# Supplementary material
Source: publisher figshare collection journal article supplement (https://gsajournals.figshare.com/ndownloader/files/10710589)
Supplement: Supplementary file 1 [file 10710589]

## Sheet: Subjects
Grb10					2018-03-12			Project licence: PPL 30/2267 (MG)						19B=1 for testing							Trevor Humby: PL 80/0339
								Enter date of test			Enter session number
													DNP		E0		E1		E2		E3		E4		E5		E6		E7		E0		E9		E0		E7
Alias	Gender	DoB	Genotype	ID	Age (d)	Age (M)		CMT	LMA	In box	In box	SNP	First	Last	First	Last	First	Last	First	Last	First	Last	First	Last	First	Last	First	Last	First	Last	First	Last	First	Last	First	Last	First	Last
GB0	M												16	19	20	29	30	34	35	39	40	44	48	52	53	57	58	62	63	67	68	72	73	77	78	82	83	87
GB1	M												20	23	24	36	37	41	42	46	48	52	53	57	58	62	63	67			68	72	73	77	78	82	83	87
GF0	M												16	19	20	34	35	39	40	44	48	52	53	57	58	62	63	67			68	72	73	77	78	82	83	87
GF1	M												16	19	20	34	35	39	40	44	48	52	53	57	58	62	63	67			68	72	73	77	78	82	83	87
GC0	M		*										16	19	20	36	37	41	42	46	48	52	53	57	58	62	63	67			68	72	73	77	78	82	83	87
GC1	M												16	19	20	35	36	40	41	45	48	52	53	57	58	62	63	67			68	72	73	77	78	82	83	87
GC2	M		*										16	19	20	34	35	39	40	44	48	52	53	57	58	62	63	67			68	72	73	77	78	82	83	87
GC3	M		*										16	19	20	29	30	34	35	39	40	44	48	52	53	57	58	62	63	67	68	72	73	77	78	82	83	87
GE0	M		*										20	23	24	29	30	34	35	39	40	44	48	52	53	57	58	62	63	67	68	72	73	77	78	82	83	87
GE1	M		*										16	19	20	29	30	34	35	39	40	44	48	52	53	57	58	62	63	67	68	72	73	77	78	82	83	87
GE2	M												16	19	20	34	35	39	40	44	48	52	53	57	58	62	63	67			68	72	73	77	78	82	83	87
GE3	M		*										16	19	20	29	30	34	35	39	40	44	48	52	53	57	58	62	63	67	68	72	73	77	78	82	83	87
GK1	M												20	23	24	37	38	42	43	47	48	52	53	57	58	62	63	67			68	72	73	77	78	82	83	87
GK2	M												16	19	20	27	F.D 25/04/11	.	.	.	.	.	.	.	.	.	.	.	.	.	.	.	.	.	.	.	.	.
GK3	M		*										16	19	20	35	36	40	41	45	48	52	53	57	58	62	63	67			68	72	73	77	78	82	83	87
GK4	M		*										16	19	20	29	30	34	35	39	40	44	48	52	53	57	58	62	63	67	68	72	73	77	78	82	83	87
GA0	M												16	19	20	34	35	39	40	44	48	52	53	57	58	62	63	67			68	72	73	77	78	82	83	87
GA1	M												16	19	20	29	30	34	35	39	40	44	48	52	53	57	58	62	63	67	68	72	73	77	78	82	83	87
GA2	M		*										16	19	20	29	30	34	35	39	40	44	48	52	53	57	58	62	63	67	68	72	73	77	78	82	83	87
GJ1	M		*										16	19	20	37	38	42	43	47	48	52	53	57	58	62	63	67			68	72	73	77	78	82	83	87
GJ2	M		*										20	23	24	34	35	39	40	44	48	52	53	57	58	62	63	67			68	72	73	77	78	82	83	87
GJ3	M												16	19	20	34	35	39	40	44	48	52	53	57	58	62	63	67			68	72	73	77	78	82	83	87
GG1	M		*										16	19	20	34	35	39	40	44	48	52	53	57	58	62	63	67			68	72	73	77	78	82	83	87
GG2	M		*										16	19	20	29	30	34	35	39	40	44	48	52	53	57	58	62	63	67	68	72	73	77	78	82	83	87
WT	0									N	0	0	24	24	24	24	23	23	23	23	23	23	23	23	23	23	23	23	9	9	23	23	23	23
Grb10	0
										Adjusted delays/block				Non-adjusted delay is 1s in all blocks
										Block	1	2	3
										E0	1	1	1
										E1	1	2	4
										E2	1	4	8
										E3	1	8	16
										E4	1	12	24
										E5	1	16	32
										E6	1	20	40
										E7	1	30	60
										E0	1	60	120
										E9	40	20	1

## Sheet: FedRep
				Panel Pushes								Beam Breaks
Alias	Genotype	DoB		4	5	6		Alias	Genotype	DoB		1	2	3	4	5	6
GB0				40	69	83		GB0				692	587	764	839	924	891
GB1				3	56	31		GB1				674	472	602	478	381	397
GF0				72	113	129		GF0				900	859	768	778	467	427
GF1				71	79	77		GF1				635	580	610	420	467	587
GC0	+ve			86	89	60		GC0	+ve			813	666	1141	1193	636	577
GC1				62	43	84		GC1				711	607	694	541	604	695
GC2	+ve			56	84	49		GC2	+ve			1482	1160	1072	803	1181	993
GC3	+ve			190	113	119		GC3	+ve			515	416	479	464	570	686
GE0	+ve			168	100	139		GE0	+ve			581	644	646	422	626	617
GE1	+ve			25	12	82		GE1	+ve			898	736	644	491	596	440
GE2				93	37	64		GE2				1043	849	996	604	840	505
GE3	+ve			91	42	43		GE3	+ve			1775	2500	2580	1605	2014	1945
GK1				60	83	86		GK1				800	896	758	597	959	860
GK2				109	192	212		GK2				679	662	680	623	898	944
GK3	+ve			62	47	56		GK3	+ve			873	587	732	538	703	790
GK4	+ve			164	164	219		GK4	+ve			347	250	517	337	280	406
GA0				161	214	258		GA0				456	405	403	351	461	326
GA1				85	179	153		GA1				793	923	803	641	676	812
GA2	+ve			65	116	101		GA2	+ve			845	819	806	600	766	726
GJ1	+ve			203	110	52		GJ1	+ve			1048	1210	1167	857	879	1036
GJ2	+ve			62	23	66		GJ2	+ve			724	830	889	681	954	871
GJ3				33	54	260		GJ3				973	933	1011	864	900	984
GG1	+ve			29	34	52		GG1	+ve			1171	844	945	718	690	1090
GG2	+ve			122	84	116		GG2	+ve			318	291	307	291	289	272
	WT	Mean		71.7273	101.727	130.636			WT	Mean	#DIV/0!	759.636	706.636	735.364	612.364	688.818	675.273
		SE		12.5952	19.2586	24.0757				SE	#DIV/0!	50.1605	57.6591	52.1904	49.7101	66.8742	71.6763
	Grb10	Mean		101.769	78.3077	88.7692			Grb10	Mean	#DIV/0!	876.154	842.538	917.308	692.308	783.385	803.769
		SE		16.9585	12.2314	13.8985				SE	#DIV/0!	116.826	159.49	156.531	101.565	122.767	117.624
	WT	11
	Grb10	13
		24

## Sheet: Trainer1
																				Trials
																				GC0	*	3	1	7	2	3	1	1	2	7
GB0	7	WT	35	0	1758.63	2449.03	322.71	54	19	35	63	35	28	906	536	370		ZZ		GC2	*	21	15	36	38	28	28	34	45	42
GB1	7	WT	14	0	5207.5	2738	246.86	23	9	14	63	14	49	517	177	340		ZZ		GC3	*	16	66	84	50	55	48	41	61	67
GF0	7	WT	6	0	9771.5	451.17	521	9	3	6	74	6	68	353	31	322		ZZ		GE0	*	4	59	66	55	64	62	71	77	79
GF1	7	WT	22	0	7230.36	283.23	568.45	27	5	22	102	22	80	904	47	857		ZZ		GE1	*	31	40	65	56	54	61	64	70	63
GC0	7	+ve	3	0	39224.7	2066	206.33	5	2	3	62	3	59	1216	73	1143		ZZ		GE3	*	51	57	80	63	80	89	75	91	90
GC1	7	WT	15	0	6853.27	4211	56.33	27	12	15	30	15	15	808	290	518		ZZ		GK3	*	27	38	24	28	29	34	24	42	37
GC2	7	+ve	21	0	3492.48	4229.48	322.57	28	7	21	32	21	11	1332	699	633		ZZ		GK4	*	91	56	61	70	85	57	67	97	121
GC3	7	+ve	16	0	6335.25	273.06	489.5	20	4	16	88	16	72	663	31	632		ZZ		GA2	*	1	29	46	53	55	52	42	65	69
GE0	7	+ve	4	0	28872.8	671.75	481.75	22	18	4	132	4	128	364	13	351		ZZ		GJ1	*	6	21	44	34	42	32	28	41	38
GE1	7	+ve	31	0	3830.97	1326.16	374.94	50	19	31	138	31	107	913	299	614		ZZ		GJ2	*	5	2	4	1	1	1	2	2	7
GE2	7	WT	19	0	6718.89	701.42	211.68	25	6	19	72	19	53	1214	79	1135		ZZ		GG1	*	4	7	5	4	15	21	14	32	35
GE3	7	+ve	51	0	2624.06	262.92	499.75	79	28	51	62	51	11	2549	75	2474		ZZ		GG2	*	11	10	27	32	27	37	34	34	44
GK1	7	WT	6	0	8902.83	6563	66.83	7	1	6	31	6	25	699	362	337		ZZ			Grb10m+/p-	20.8462	30.8462	42.2308	37.3846	41.3846	40.2308	38.2308	50.6923	53.7692
GK2	7	WT	3	0	20550.7	916.33	75.67	4	1	3	23	3	20	612	14	598		ZZ				7.09084	6.48356	7.72787	6.50398	7.50003	6.92372	6.96526	8.28838	8.93434
GK3	7	+ve	27	0	4668.78	1202.81	489.81	36	9	27	52	27	25	1108	241	867		ZZ
GK4	7	+ve	91	0	870.76	596.52	404.62	157	66	91	142	91	51	578	250	328		ZZ		GB0		35	27	30	36	29	33	24	34	47
GA0	7	WT	49	0	1558.18	1676.63	357.76	77	28	49	177	49	128	596	369	227		ZZ		GB1		14	10	6	3	4	3	4	5	2
GA1	7	WT	58	0	1350.4	1139.55	378.26	72	14	58	83	58	25	1194	534	660		ZZ		GF0		6	3	12	22	22	19	15	26	24
GA2	7	+ve	1	0	1531	552	25	2	1	1	4	1	3	16	2	14		ZZ		GF1		22	40	48	24	31	31	31	35	43
GJ1	7	+ve	6	0	11508.3	419.5	579.5	10	4	6	44	6	38	775	30	745		ZZ		GC1		15	19	15	23	30	16	25	22	28
GJ2	7	+ve	5	0	29293.6	1819.6	108.8	8	3	5	105	5	100	605	68	537		ZZ		GE2		19	17	35	34	37	46	49	47	41
GJ3	7	WT	8	0	9333.62	3450.62	13.25	11	3	8	51	8	43	829	191	638		ZZ		GK1		6	11	5	5	4	1	1	1	6
GG1	7	+ve	4	0	37558.2	1580.25	709.5	4	0	4	46	4	42	1100	55	1045		ZZ		GK2		3	1	21	52	54	45	33	53	70
GG2	7	+ve	11	0	9604.36	708.18	332.82	16	5	11	45	11	34	424	53	371		ZZ		GA0		49	53	55	54	52	44	55	65	63
																				GA1		58	54	60	59	64	60	53	79	76
WT	11	Mean	21.3636	0	7203.26	2234.54	256.255	30.5455	9.18182	21.3636	69.9091	21.3636	48.5455	784.727	239.091	545.636				GJ3		8	30	26	39	35	45	35	55	61
Grb10	13	Mean	20.8462	0	15806.9	1264.45	375.496	22.1818	8.27273	13.9091	68.9091	13.9091	55	905.182	127.091	778.091					WT	21.3636	24.0909	28.4545	31.9091	32.9091	31.1818	29.5455	38.3636	41.9091
		SE	5.54367	0	1630.07	580.021	57.7416	7.77217	2.55776	5.54367	12.9513	5.54367	10.0917	80.5708	58.1819	81.8879						5.54367	5.60106	5.79555	5.63827	5.73261	5.78685	5.51916	7.31533	7.49843
		SE	7.09084	0	3993.81	300.883	52.6508	11.9102	5.00404	7.09084	12.1935	7.09084	10.9384	172.588	53.5618	166.823
GB0	8	WT	27	0	2908.15	3384.93	102.26	40	13	27	52	27	25	971	518	453		ZZ
GB1	8	WT	10	0	4351.3	11093.2	370	16	6	10	35	10	25	512	358	154		ZZ
GF0	8	WT	3	0	55595.3	1054	795.33	3	0	3	25	3	22	1009	8	1001		ZZ
GF1	8	WT	40	0	1980.53	1737.57	419.05	48	8	40	62	40	22	865	395	470		ZZ
GC0	8	+ve	1	0	0	0	0	0	0	0	56	0	56	1122	0	1122		ZZ
GC1	8	WT	19	0	3528.11	5196	136.58	42	23	19	78	19	59	969	490	479		ZZ
GC2	8	+ve	15	0	10885.8	354.93	542.73	19	4	15	99	15	84	1303	40	1263		ZZ
GC3	8	+ve	66	0	994.85	1217.89	367.8	108	42	66	108	66	42	654	335	319		ZZ
GE0	8	+ve	59	0	1803.02	577.71	397.86	74	15	59	134	59	75	814	225	589		ZZ
GE1	8	+ve	40	0	3593.23	363.6	469.73	47	7	40	150	40	110	991	114	877		ZZ
GE2	8	WT	17	0	5164.65	646.24	203.35	18	1	17	59	17	42	902	56	846		ZZ
GE3	8	+ve	57	0	635.42	1754.35	446.02	86	29	57	64	57	7	2062	1594	468		ZZ
GK1	8	WT	11	0	8685.18	6105	102.36	12	1	11	102	11	91	1056	496	560		ZZ
GK2	8	WT	1	0	12664	561	20	2	1	1	14	1	13	173	6	167		ZZ
GK3	8	+ve	38	0	1389.16	2134.63	453.58	56	18	38	47	38	9	887	462	425		ZZ
GK4	8	+ve	56	0	2228.62	729.21	236.2	80	24	56	92	56	36	585	194	391		ZZ
GA0	8	WT	53	0	1775.85	1345.19	217.72	78	25	53	85	53	32	772	466	306		ZZ
GA1	8	WT	54	0	1226.8	1547.06	442.91	79	25	54	70	54	16	1010	556	454		ZZ
GA2	8	+ve	29	0	5152.48	697.03	55.59	48	19	29	98	29	69	1338	115	1223		ZZ
GJ1	8	+ve	21	0	7088.43	359.43	563.95	36	15	21	64	21	43	1453	60	1393		ZZ
GJ2	8	+ve	2	0	78119.5	4464	217.5	2	0	2	41	2	39	860	104	756		ZZ
GJ3	8	WT	30	0	2598.5	673.93	207.53	33	3	30	125	30	95	1125	252	873		ZZ
GG1	8	+ve	7	0	21984.1	1763.29	478.29	26	19	7	120	7	113	1294	90	1204		ZZ
GG2	8	+ve	10	0	16149.3	926.5	506.7	16	6	10	125	10	115	465	24	441		ZZ
WT	11	Mean	24.0909	0	9134.4	3031.28	274.281	33.7273	9.63636	24.0909	64.2727	24.0909	40.1818	851.273	327.364	523.909
Grb10	13	Mean	30.8462	0	11540.3	1180.2	364.304	46	15.2308	30.7692	92.1538	30.7692	61.3846	1063.69	258.231	805.462
		SE	5.60106	0	4758.42	987.33	66.4354	8.14984	3.07267	5.60106	9.94173	5.60106	8.76856	84.1704	64.1606	84.265
		SE	6.48356	0	5848.07	326.638	50.5006	9.36099	3.36108	6.51345	9.75064	6.51345	10.2053	119.639	117.091	108.67
GB0	9	WT	30	0	2978.2	2529.7	162.67	35	5	30	63	30	33	1034	494	540		ZZ
GB1	9	WT	6	0	17934.7	10195	402.83	9	3	6	31	6	25	520	193	327		ZZ
GF0	9	WT	12	0	9667.58	820.5	435.17	27	15	12	46	12	34	1032	82	950		ZZ
GF1	9	WT	48	0	1999.94	1239.85	395.06	55	7	48	60	48	12	823	375	448		ZZ
GC0	9	+ve	7	0	17750.6	7090.29	165	15	8	7	53	7	46	1482	438	1044		ZZ
GC1	9	WT	15	0	3736.73	7639.2	77.73	23	8	15	36	15	21	792	422	370		ZZ
GC2	9	+ve	36	0	2477.72	2050.78	300	44	8	36	86	36	50	1220	621	599		ZZ
GC3	9	+ve	84	0	602.82	1175.12	286.1	125	41	84	105	84	21	648	367	281		ZZ
GE0	9	+ve	66	0	1910.14	453.14	342.24	80	14	66	140	66	74	791	170	621		ZZ
GE1	9	+ve	65	0	1329.72	899.78	373.55	83	18	65	82	65	17	1001	525	476		ZZ
GE2	9	WT	35	0	1434.29	3024.31	164.8	51	16	35	52	35	17	1553	963	590		ZZ
GE3	9	+ve	80	0	580.14	1111.06	498.52	92	12	80	86	80	6	1845	1224	621		ZZ
GK1	9	WT	5	0	18974.2	13170.2	20.8	6	1	5	54	5	49	1214	497	717		ZZ
GK2	9	WT	21	0	7645.19	809.57	45.24	33	12	21	152	21	131	895	78	817		ZZ
GK3	9	+ve	24	0	3013.12	3567.5	363.67	29	5	24	36	24	12	975	574	401		ZZ
GK4	9	+ve	61	0	1802.74	699.28	338.48	86	25	61	96	61	35	486	165	321		ZZ
GA0	9	WT	55	0	1874.07	1109.22	272.35	71	16	55	107	55	52	909	419	490		ZZ
GA1	9	WT	60	0	985.37	1656.3	333.1	76	16	60	71	60	11	1276	780	496		ZZ
GA2	9	+ve	46	0	1628.91	2164.33	60.04	75	29	46	94	46	48	1378	834	544		ZZ
GJ1	9	+ve	44	0	2702.41	845.39	428.23	65	21	44	71	44	27	1311	348	963		ZZ
GJ2	9	+ve	4	0	30183.2	12739.8	247.75	6	2	4	22	4	18	761	297	464		ZZ
GJ3	9	WT	26	0	6257.04	312.38	255.92	34	8	26	119	26	93	1328	116	1212		ZZ
GG1	9	+ve	5	0	12996.2	447	504.8	7	2	5	33	5	28	635	32	603		ZZ
GG2	9	+ve	27	0	2957.81	2302.85	479.89	46	19	27	54	27	27	464	184	280		ZZ
WT	11	Mean	28.4545	0	6680.66	3864.2	233.243	38.1818	9.72727	28.4545	71.9091	28.4545	43.4545	1034.18	401.727	632.455
Grb10	13	Mean	42.2308	0	6148.89	2734.33	337.559	57.9231	15.6923	42.2308	73.6923	42.2308	31.4615	999.769	444.538	555.231
		SE	5.79555	0	1942.73	1327.95	44.9303	6.90957	1.67381	5.79555	11.4562	5.79555	11.285	87.8528	85.7779	81.0939
		SE	7.72787	0	2463.56	971.822	36.0977	10.1939	3.17519	7.72787	9.20938	7.72787	5.20677	117.244	89.2396	65.1602
GB0	10	WT	36	0	3443.92	1178.56	175.89	40	4	36	89	36	53	959	267	692		ZZ
GB1	10	WT	3	0	28688.3	11941.3	380.67	5	2	3	13	3	10	330	112	218		ZZ
GF0	10	WT	22	0	5000.86	666.09	343.68	31	9	22	51	22	29	946	153	793		ZZ
GF1	10	WT	24	0	4923.75	279.58	465.29	34	10	24	41	24	17	577	55	522		ZZ
GC0	10	+ve	2	0	48464	4910.5	173.5	3	1	2	21	2	19	815	92	723		ZZ
GC1	10	WT	23	0	6273.65	1063.04	121.57	33	10	23	43	23	20	908	162	746		ZZ
GC2	10	+ve	38	0	1637.18	2777.89	200.95	48	10	38	69	38	31	1359	887	472		ZZ
GC3	10	+ve	50	0	1586.4	1207.46	320.3	79	29	50	70	50	20	559	266	293		ZZ
GE0	10	+ve	55	0	2311.31	550.89	358.16	64	9	55	111	55	56	867	191	676		ZZ
GE1	10	+ve	56	0	1363.62	1314.93	425.36	87	31	56	62	56	6	792	406	386		ZZ
GE2	10	WT	34	0	1876.26	3107.85	158.24	47	13	34	58	34	24	1682	1049	633		ZZ
GE3	10	+ve	63	0	820.33	1503.14	481.54	81	18	63	71	63	8	2518	1792	726		ZZ
GK1	10	WT	5	0	25373.8	4710.2	250.6	5	0	5	63	5	58	1028	182	846		ZZ
GK2	10	WT	52	0	1554.19	1355.29	24.42	70	18	52	219	52	167	816	342	474		ZZ
GK3	10	+ve	28	0	1994.04	3564.86	400.11	33	5	28	39	28	11	895	534	361		ZZ
GK4	10	+ve	70	0	1554.11	593.49	317.36	104	34	70	110	70	40	559	197	362		ZZ
GA0	10	WT	54	0	2172.07	264.59	396.94	58	4	54	84	54	30	492	85	407		ZZ
GA1	10	WT	59	0	782.97	1855.92	374.69	85	26	59	61	59	2	1029	727	302		ZZ
GA2	10	+ve	53	0	828.45	2010.66	39.02	78	25	53	80	53	27	1086	735	351		ZZ
GJ1	10	+ve	34	0	2183.74	2356.15	432.62	58	24	34	50	34	16	1222	567	655		ZZ
GJ2	10	+ve	1	0	0	0	0	0	0	0	0	0	0	0	0	0		ZZ
GJ3	10	WT	39	0	3605.67	212.69	226.08	41	2	39	85	39	46	1110	113	997		ZZ
GG1	10	+ve	4	0	41832.5	490.75	618.5	7	3	4	59	4	55	1230	24	1206		ZZ
GG2	10	+ve	32	0	2772.5	1999.84	461.66	40	8	32	59	32	27	497	184	313		ZZ
WT	11	Mean	31.9091	0	7608.68	2421.38	265.279	40.8182	8.90909	31.9091	73.3636	31.9091	41.4545	897.909	295.182	602.727
Grb10	13	Mean	37.3846	0	8257.55	1790.81	325.314	52.4615	15.1538	37.3077	61.6154	37.3077	24.3077	953.769	451.923	501.846
		SE	5.63827	0	2946.15	1037.41	41.4111	7.32842	2.36818	5.63827	16.0433	5.63827	13.6131	108.586	94.2467	72.6197
		SE	6.50398	0	4560.76	382.161	49.5847	9.4744	3.37572	6.5402	8.56239	6.5402	4.89425	165.312	135.013	82.2894
GB0	11	WT	29	0	2656.86	2923.07	76.48	36	7	29	43	29	14	891	527	364		ZZ
GB1	11	WT	4	0	15229.8	27768	614.75	5	1	4	10	4	6	485	317	168		ZZ
GF0	11	WT	22	0	4089.18	2403.5	157.41	30	8	22	48	22	26	668	274	394		ZZ
GF1	11	WT	31	0	3004.26	1830.87	508.77	38	7	31	45	31	14	812	299	513		ZZ
GC0	11	+ve	3	0	35395.7	4311	1330	4	1	3	37	3	34	0	0	0		ZZ
GC1	11	WT	30	0	4678.97	928.97	75.77	37	7	30	48	30	18	695	165	530		ZZ
GC2	11	+ve	28	0	3987.57	1816.46	372.68	38	10	28	61	28	33	1354	487	867		ZZ
GC3	11	+ve	55	0	1194.56	1741.31	301.07	77	22	55	82	55	27	547	281	266		ZZ
GE0	11	+ve	64	0	1711.87	594.87	355.12	81	17	64	98	64	34	736	203	533		ZZ
GE1	11	+ve	54	0	1614.85	736.17	386.41	69	15	54	64	54	10	672	268	404		ZZ
GE2	11	WT	37	0	952.05	3680.24	152.16	44	7	37	58	37	21	1339	1083	256		ZZ
GE3	11	+ve	80	0	1000.86	679.8	473.98	88	8	80	114	80	34	2697	1089	1608		ZZ
GK1	11	WT	4	0	34474.8	1012.75	428.5	4	0	4	194	4	190	0	0	0		ZZ
GK2	11	WT	54	0	1925	1172.65	27.33	73	19	54	184	54	130	704	317	387		ZZ
GK3	11	+ve	29	0	2529.48	2440.38	416.38	36	7	29	43	29	14	759	355	404		ZZ
GK4	11	+ve	85	0	1483.73	206.52	385.48	117	32	85	143	85	58	551	149	402		ZZ
GA0	11	WT	52	0	1224.42	1507.56	249.04	63	11	52	78	52	26	606	326	280		ZZ
GA1	11	WT	64	0	641.12	1613.72	401.91	78	14	64	72	64	8	1040	699	341		ZZ
GA2	11	+ve	55	0	847.07	2253.78	29.31	77	22	55	134	55	79	1205	791	414		ZZ
GJ1	11	+ve	42	0	1459.12	2339.26	416.86	56	14	42	51	42	9	1422	1000	422		ZZ
GJ2	11	+ve	1	0	8713	2925	1070	2	1	1	8	1	7	0	0	0		ZZ
GJ3	11	WT	35	0	2565.97	761.8	191.43	42	7	35	95	35	60	855	242	613		ZZ
GG1	11	+ve	15	0	5115.6	360.4	618	24	9	15	30	15	15	885	75	810		ZZ
GG2	11	+ve	27	0	4134.85	1308.81	407.15	34	7	27	55	27	28	521	142	379		ZZ
WT	11	Mean	32.9091	0	6494.76	4145.74	262.141	40.9091	8	32.9091	79.5455	32.9091	46.6364	735.909	386.273	349.636
Grb10	13	Mean	41.3846	0	5322.17	1670.29	504.803	54.0769	12.6923	41.3846	70.7692	41.3846	29.3846	873	372.308	500.692
		SE	5.73261	0	3051.46	2377.82	59.1567	7.21294	1.6068	5.73261	17.6142	5.73261	17.91	101.306	88.1871	52.3171
		SE	7.50003	0	2580.89	329.669	93.8823	9.5491	2.47133	7.50003	11.3923	7.50003	5.71832	194.481	101.679	115.205
GB0	12	WT	33	0	2371.12	1364.85	231.09	33	0	33	70	33	37	558	251	307		ZZ
GB1	12	WT	3	0	46101	2354	764	3	0	3	17	3	14	386	46	340		ZZ
GF0	12	WT	19	0	3642.53	1759.16	190.89	26	7	19	34	19	15	636	260	376		ZZ
GF1	12	WT	31	0	3709.23	1147.32	461.19	39	8	31	86	31	55	914	281	633		ZZ
GC0	12	+ve	1	0	2588	446	871	2	1	1	2	1	1	0	0	0		ZZ
GC1	12	WT	16	0	8856	2065.56	79	19	3	16	36	16	20	618	179	439		ZZ
GC2	12	+ve	28	0	2230.29	3657.75	466.82	47	19	28	37	28	9	1091	718	373		ZZ
GC3	12	+ve	48	0	874.17	2243.48	304.54	60	12	48	65	48	17	484	288	196		ZZ
GE0	12	+ve	62	0	1646.66	925.32	233.24	86	24	62	125	62	63	606	261	345		ZZ
GE1	12	+ve	61	0	1292.44	718.02	434.38	78	17	61	71	61	10	573	212	361		ZZ
GE2	12	WT	46	0	2126.37	1218.63	127.83	50	4	46	67	46	21	1205	395	810		ZZ
GE3	12	+ve	89	0	1212.24	371.99	425.55	103	14	89	133	89	44	2247	560	1687		ZZ
GK1	12	WT	1	0	57155	1168	527	1	0	1	16	1	15	0	0	0		ZZ
GK2	12	WT	45	0	1644.29	2305.02	25.96	71	26	45	138	45	93	680	396	284		ZZ
GK3	12	+ve	34	0	2150.12	2403.44	453.97	39	5	34	42	34	8	802	437	365		ZZ
GK4	12	+ve	57	0	1494.79	288.68	378.11	80	23	57	67	57	10	244	84	160		ZZ
GA0	12	WT	44	0	2501.43	1202.7	274.3	65	21	44	162	44	118	443	222	221		ZZ
GA1	12	WT	60	0	771.8	1591	421.45	78	18	60	71	60	11	998	676	322		ZZ
GA2	12	+ve	52	0	557.15	2265.31	37.58	73	21	52	65	52	13	986	649	337		ZZ
GJ1	12	+ve	32	0	2174.53	1861.5	382.41	49	17	32	53	32	21	1008	481	527		ZZ
GJ2	12	+ve	1	0	0	0	0	0	0	0	25	0	25	0	0	0		ZZ
GJ3	12	WT	45	0	2218.56	1589.4	170.67	52	7	45	94	45	49	1106	489	617		ZZ
GG1	12	+ve	21	0	7161.95	202.14	459.52	24	3	21	52	21	31	1215	69	1146		ZZ
GG2	12	+ve	37	0	1747.78	2119.3	401.86	63	26	37	55	37	18	424	255	169		ZZ
WT	11	Mean	31.1818	0	11917.9	1615.06	297.58	39.7273	8.54545	31.1818	71.9091	31.1818	40.7273	685.818	290.455	395.364
Grb10	13	Mean	40.2308	0	1933.09	1346.38	372.998	54.1538	14	40.1538	60.9231	40.1538	20.7692	744.615	308.769	435.846
		SE	5.78685	0	5999.75	136.697	67.0898	7.89141	2.73816	5.78685	14.1636	5.78685	10.7577	106.099	58.3047	67.0935
		SE	6.92372	0	480.074	315.668	59.6023	8.76096	2.51661	6.96037	9.91726	6.96037	4.70427	166.183	67.2779	131.446
GB0	13	WT	24	0	3663.25	928.58	175.87	26	2	24	60	24	36	598	124	474		ZZ
GB1	13	WT	4	0	39300.8	1118	581.25	5	1	4	17	4	13	408	23	385		ZZ
GF0	13	WT	15	0	9225.53	1704.4	50	17	2	15	37	15	22	735	171	564		ZZ
GF1	13	WT	31	0	4512.1	587.9	633.16	33	2	31	58	31	27	955	147	808		ZZ
GC0	13	+ve	1	0	144984	3033	1146	1	0	1	18	1	17	0	0	0		ZZ
GC1	13	WT	25	0	4387.24	2214.32	59.76	41	16	25	46	25	21	575	255	320		ZZ
GC2	13	+ve	34	0	2523.56	2231.85	403.44	46	12	34	47	34	13	887	408	479		ZZ
GC3	13	+ve	41	0	1028.15	2763.46	358.07	59	18	41	51	41	10	485	348	137		ZZ
GE0	13	+ve	71	0	1935.8	230.58	352.76	76	5	71	165	71	94	592	90	502		ZZ
GE1	13	+ve	64	0	1287.42	1020.89	416.55	70	6	64	73	64	9	580	254	326		ZZ
GE2	13	WT	49	0	2080.22	1479.06	93.33	54	5	49	72	49	23	1655	633	1022		ZZ
GE3	13	+ve	75	0	1556.12	280.12	401.36	86	11	75	91	75	16	2115	333	1782		ZZ
GK1	13	WT	1	0	0	0	0	0	0	0	75	0	75	0	0	0		ZZ
GK2	13	WT	33	0	2380.58	2906.09	29.67	41	8	33	116	33	83	622	374	248		ZZ
GK3	13	+ve	24	0	908.25	5635.62	305.37	31	7	24	26	24	2	583	412	171		ZZ
GK4	13	+ve	67	0	1203.64	103.73	343.93	91	24	67	72	67	5	416	89	327		ZZ
GA0	13	WT	55	0	1116.82	456.64	405.53	64	9	55	71	55	16	359	139	220		ZZ
GA1	13	WT	53	0	813.77	1312.08	419.09	61	8	53	61	53	8	814	474	340		ZZ
GA2	13	+ve	42	0	1241.26	1776.1	35.33	62	20	42	64	42	22	865	537	328		ZZ
GJ1	13	+ve	28	0	2735.25	1611.18	369.07	36	8	28	63	28	35	980	402	578		ZZ
GJ2	13	+ve	2	0	51069.5	1774	693	2	0	2	41	2	39	0	0	0		ZZ
GJ3	13	WT	35	0	1500.74	1046.83	178.69	37	2	35	71	35	36	730	349	381		ZZ
GG1	13	+ve	14	0	6945.71	188.86	372.93	17	3	14	31	14	17	764	52	712		ZZ
GG2	13	+ve	34	0	1006.44	1944.97	367.94	44	10	34	38	34	4	359	270	89		ZZ
WT	11	Mean	29.5455	0	6271	1250.35	238.759	34.4545	5	29.4545	62.1818	29.4545	32.7273	677.364	244.455	432.909
Grb10	13	Mean	38.2308	0	16801.9	1738.03	428.135	47.7692	9.53846	38.2308	60	38.2308	21.7692	663.538	245.769	417.769
		SE	5.51916	0	3390.18	247.307	69.4322	6.38516	1.45227	5.56673	7.55202	5.56673	7.38314	124.688	58.8376	85.2748
		SE	6.96526	0	11332.5	425.232	70.8986	8.24944	2.06502	6.96526	10.4942	6.96526	6.7626	147.469	49.9411	129.244
GB0	14	WT	34	0	3156.62	2010.5	54.12	35	1	34	108	34	74	901	318	583		ZZ
GB1	14	WT	5	0	33950.4	754.2	522.2	6	1	5	43	5	38	478	26	452		ZZ
GF0	14	WT	26	0	1619.23	391.65	148.58	36	10	26	56	26	30	373	61	312		ZZ
GF1	14	WT	35	0	2785.51	1635.89	523.83	45	10	35	44	35	9	801	369	432		ZZ
GC0	14	+ve	2	0	69793.5	2082.5	1167.5	6	4	2	31	2	29	0	0	0		ZZ
GC1	14	WT	22	0	2156.59	5878.05	102.18	39	17	22	84	22	62	792	524	268		ZZ
GC2	14	+ve	45	0	2046.18	1377.33	438	62	17	45	74	45	29	975	450	525		ZZ
GC3	14	+ve	61	0	954.05	1336.93	366.74	73	12	61	65	61	4	563	274	289		ZZ
GE0	14	+ve	77	0	1345.7	693.47	271.68	82	5	77	130	77	53	625	160	465		ZZ
GE1	14	+ve	70	0	1392.24	728.8	431.74	83	13	70	81	70	11	604	181	423		ZZ
GE2	14	WT	47	0	1928.87	1335.66	54.38	54	7	47	60	47	13	1448	490	958		ZZ
GE3	14	+ve	91	0	1103.19	251.58	411.56	102	11	91	105	91	14	1829	415	1414		ZZ
GK1	14	WT	1	0	140376	2804	574	1	0	1	36	1	35	0	0	0		ZZ
GK2	14	WT	53	0	976.45	1219.7	24.75	59	6	53	133	53	80	730	381	349		ZZ
GK3	14	+ve	42	0	1318.71	2288.38	464.62	46	4	42	52	42	10	678	406	272		ZZ
GK4	14	+ve	97	0	1289.64	145.78	387.4	122	25	97	104	97	7	428	160	268		ZZ
GA0	14	WT	65	0	1203.85	1005.89	263.46	76	11	65	86	65	21	681	288	393		ZZ
GA1	14	WT	79	0	906.95	819.63	437.35	90	11	79	87	79	8	891	417	474		ZZ
GA2	14	+ve	65	0	878.03	1756.63	35.94	85	20	65	101	65	36	823	445	378		ZZ
GJ1	14	+ve	41	0	1295.73	2312.07	428.46	49	8	41	53	41	12	1126	733	393		ZZ
GJ2	14	+ve	2	0	84255.5	984	913.5	3	1	2	28	2	26	0	0	0		ZZ
GJ3	14	WT	55	0	2531.09	382.15	210.65	59	4	55	166	55	111	1350	265	1085		ZZ
GG1	14	+ve	32	0	3000.97	2195.09	361.22	40	8	32	43	32	11	1182	475	707		ZZ
GG2	14	+ve	34	0	1339.91	3220.35	332.53	44	10	34	53	34	19	463	281	182		ZZ
WT	11	Mean	38.3636	0	17417.4	1657.94	265.045	45.4545	7.09091	38.3636	82.0909	38.3636	43.7273	767.727	285.364	482.364
Grb10	13	Mean	50.6923	0	13078	1490.22	462.376	61.3077	10.6154	50.6923	70.7692	50.6923	20.0769	715.077	306.154	408.923
		SE	7.31533	0	12634.5	474.047	63.8109	8.05138	1.59804	7.31533	12.2915	7.31533	10.1499	123.383	55.0058	92.2683
		SE	8.28838	0	7915.18	254.111	78.6935	9.65254	1.90996	8.28838	8.77508	8.28838	3.86546	136.825	57.7353	99.8709
GB0	15	WT	47	0	2817.4	771.06	128.15	50	3	47	145	47	98	814	175	639
GB1	15	WT	2	0	79545	903	2351	2	0	2	26	2	24	481	9	472
GF0	15	WT	24	0	4769.62	349.58	172.62	25	1	24	42	24	18	591	47	544
GF1	15	WT	43	0	2115.4	515.07	511.91	62	19	43	63	43	20	762	255	507
GC0	15	+ve	7	0	16129.4	883.14	882	8	1	7	56	7	49	0	0	0
GC1	15	WT	28	0	3817.79	2160.75	100	34	6	28	79	28	51	1013	442	571
GC2	15	+ve	42	0	2261.69	1300.79	431.57	55	13	42	59	42	17	1124	423	701
GC3	15	+ve	67	0	558.84	1527.84	343.33	84	17	67	77	67	10	655	429	226
GE0	15	+ve	79	0	1611.75	277.01	316.82	94	15	79	111	79	32	652	124	528
GE1	15	+ve	63	0	1354.56	292.95	453.73	68	5	63	72	63	9	506	121	385
GE2	15	WT	41	0	3108.39	1173.49	51.88	59	18	41	83	41	42	1788	413	1375
GE3	15	+ve	90	0	1117.62	513.7	342.67	102	12	90	109	90	19	2065	799	1266
GK1	15	WT	6	0	21862.7	1487	773.83	14	8	6	48	6	42	0	0	0
GK2	15	WT	70	0	1883.93	318.56	20.74	77	7	70	190	70	120	907	271	636
GK3	15	+ve	37	0	1664.43	2509.11	332.24	38	1	37	43	37	6	839	473	366
GK4	15	+ve	121	0	985.01	144.36	327.93	153	32	121	162	121	41	697	214	483
GA0	15	WT	63	0	1802.71	611.98	325.38	77	14	63	91	63	28	514	148	366
GA1	15	WT	76	0	1089.8	502.63	458.53	83	7	76	87	76	11	748	258	490
GA2	15	+ve	69	0	1026.8	969.93	22.3	93	24	69	109	69	40	979	427	552
GJ1	15	+ve	38	0	2066.53	1532.53	433.53	44	6	38	47	38	9	1015	494	521
GJ2	15	+ve	7	0	16097.6	747.57	1211.71	13	6	7	39	7	32	0	0	0
GJ3	15	WT	61	0	936.51	1403.72	211.05	69	8	61	179	61	118	1012	602	410
GG1	15	+ve	35	0	2731.34	1668.74	380.46	42	7	35	49	35	14	1151	421	730
GG2	15	+ve	44	0	842.64	1759.45	425.59	50	6	44	56	44	12	350	225	125
WT	11	Mean	41.9091	0	11249.9	926.985	464.099	50.1818	8.27273	41.9091	93.9091	41.9091	52	784.545	238.182	546.364
Grb10	13	Mean	53.7692	0	3726.79	1086.7	454.145	64.9231	11.1538	53.7692	76.0769	53.7692	22.3077	771.769	319.231	452.538
		SE	7.49843	0	7059.15	173.239	200.88	8.31955	1.90736	7.49843	16.4734	7.49843	12.2541	133.037	57.5365	98.339
		SE	8.93434	0	1533.97	194.901	81.0583	11.0607	2.52385	8.93434	10.1061	8.93434	4.04206	150.22	63.5659	94.7964
GB1	16	WT	6	0	28818.8	496.33	384.33	11	5	6	35	6	29	711	15	696	ZZ
GC0	16	+ve	11	0	12017.2	786.18	804.27	22	11	11	125	11	114	676	21	655	ZZ
GK1	16	WT	10	0	16172.7	808.3	49.8	15	5	10	53	10	43	1092	33	1059	ZZ
GJ2	16	+ve	5	0	25102.8	887.2	1476.6	22	17	5	60	5	55	516	16	500	ZZ
WT	2	Mean	8	0	22495.8	652.315	217.065	13	5	8	44	8	36	901.5	24	877.5
Grb10	2	Mean	8	0	18560	836.69	1140.43	22	14	8	92.5	8	84.5	596	18.5	577.5
		SE	2	0	6323.07	155.985	167.265	2	0	2	9	2	7	190.5	9	181.5
		SE	3	0	6542.81	50.51	336.165	0	3	3	32.5	3	29.5	80	2.5	77.5
GB1	17	WT	11	0	10066.5	365.18	339.45	14	3	11	28	11	17	600	18	582		ZZ
GC0	17	+ve	31	0	4387.52	641.03	701.52	51	20	31	96	31	65	841	65	776		ZZ
GK1	17	WT	19	0	4783.95	3344.79	86.89	30	11	19	80	19	61	1072	450	622		ZZ
GJ2	17	+ve	36	0	3065.28	428.94	627.31	63	27	36	50	36	14	756	119	637		ZZ
WT	2	Mean	15	0	7425.25	1854.98	213.17	22	7	15	54	15	39	836	234	602
Grb10	2	Mean	33.5	0	3726.4	534.985	664.415	57	23.5	33.5	73	33.5	39.5	798.5	92	706.5
		SE	4	0	2641.3	1489.8	126.28	8	4	4	26	4	22	236	216	20
		SE	2.5	0	661.12	106.045	37.105	6	3.5	2.5	23	2.5	25.5	42.5	27	69.5
GB1	18	WT	14	0	11569.4	282.86	403.79	24	10	14	32	14	18	696	24	672		ZZ
GC0	18	+ve	38	0	2214.79	1219.05	671.55	64	26	38	102	38	64	513	151	362		ZZ
GK1	18	WT	19	0	3264.11	4376.26	61.95	33	14	19	59	19	40	975	659	316		ZZ
GJ2	18	+ve	51	0	2560.29	249.88	516.06	77	26	51	60	51	9	654	126	528		ZZ
WT	2	Mean	16.5	0	7416.77	2329.56	232.87	28.5	12	16.5	45.5	16.5	29	835.5	341.5	494
Grb10	2	Mean	44.5	0	2387.54	734.465	593.805	70.5	26	44.5	81	44.5	36.5	583.5	138.5	445
		SE	2.5	0	4152.66	2046.7	170.92	4.5	2	2.5	13.5	2.5	11	139.5	317.5	178
		SE	6.5	0	172.75	484.585	77.745	6.5	0	6.5	21	6.5	27.5	70.5	12.5	83
GB1	19	WT	19	0	8748.37	256.11	343.95	21	2	19	46	19	27	651	25	626		ZZ
GC0	19	+ve	40	0	2164.82	785.33	726.45	61	21	40	85	40	45	446	112	334		ZZ
GK1	19	WT	23	0	1935.96	4218.3	51.39	46	23	23	49	23	26	930	591	339		ZZ
GJ2	19	+ve	54	0	2433.74	373.87	489.17	58	4	54	62	54	8	557	162	395		ZZ
WT	2	Mean	21	0	5342.17	2237.2	197.67	33.5	12.5	21	47.5	21	26.5	790.5	308	482.5
Grb10	2	Mean	47	0	2299.28	579.6	607.81	59.5	12.5	47	73.5	47	26.5	501.5	137	364.5
		SE	2	0	3406.2	1981.1	146.28	12.5	10.5	2	1.5	2	0.5	139.5	283	143.5
		SE	7	0	134.46	205.73	118.64	1.5	8.5	7	11.5	7	18.5	55.5	25	30.5
GB1	20	WT
GC0	20	+ve
GK1	20	WT
GJ2	20	+ve
WT	2	Mean	#DIV/0!	#DIV/0!	#DIV/0!	#DIV/0!	#DIV/0!	#DIV/0!	#DIV/0!	#DIV/0!	#DIV/0!	#DIV/0!	#DIV/0!	#DIV/0!	#DIV/0!	#DIV/0!
Grb10	2	Mean	#DIV/0!	#DIV/0!	#DIV/0!	#DIV/0!	#DIV/0!	#DIV/0!	#DIV/0!	#DIV/0!	#DIV/0!	#DIV/0!	#DIV/0!	#DIV/0!	#DIV/0!	#DIV/0!
		SE	#DIV/0!	#DIV/0!	#DIV/0!	#DIV/0!	#DIV/0!	#DIV/0!	#DIV/0!	#DIV/0!	#DIV/0!	#DIV/0!	#DIV/0!	#DIV/0!	#DIV/0!	#DIV/0!
		SE	#DIV/0!	#DIV/0!	#DIV/0!	#DIV/0!	#DIV/0!	#DIV/0!	#DIV/0!	#DIV/0!	#DIV/0!	#DIV/0!	#DIV/0!	#DIV/0!	#DIV/0!	#DIV/0!

## Sheet: DNP
Tau - DelRei				Double Nping - Centre light=40s, stimuli=20s durations
							Correct		Incorrect			All trials				Left Responses				Right Responses
				Trials	DNS	Omits	Left	Right	Total	Left	Right	CPL	RL	MagL	Eat D	CPL	RL	MagL	Eat D	CPL	RL	MagL	Eat D	CNP	LNP	RNP	PP	BB		% responding	R/L	%DNS	CNP	LNP	RNP	PP	BB		Pref side	Subject	Gtype
GB0	16	WT	Train1	40	10	7	11	11	1	0	1	792.364	513.318	539.591	3043	937.545	676	611.455	1580	647.182	350.636	467.727	1463	43	23	20	64	589	ZZ	55	50	25	1.075	0.575	0.5	1.6	14.725		Right	GB0	WT			+ve	65	82.5	72.5	75
GF0	16	WT	Train1	40	29	3	4	4	0	0	0	1495.5	863.75	534.125	1073	1758.25	979	533.25	425	1232.75	748.5	535	648	16	7	11	24	1121	ZZ	20	.	72.5	0.4	0.175	0.275	0.6	28.025		Right	GF0	WT			+ve	47.5	47.5	47.5	47.5
GF1	16	WT	Train1	40	7	5	11	15	2	1	1	408.5	250.192	129.731	13294	255.727	257.182	118	5292	520.533	245.067	138.333	8002	52	16	18	44	491	ZZ	65	57.6923	17.5	1.3	0.4	0.45	1.1	12.275		Right	GF1	WT			+ve	90	92.5	80	75
GC1	16	WT	Train1	40	24	3	3	9	1	1	0	1259.92	570.417	1283.75	2231	917.333	373	4150.33	420	1374.11	636.222	328.222	1811	22	5	16	47	665	ZZ	30	75	60	0.55	0.125	0.4	1.175	16.625		Right	GC1	WT			+ve	82.5	90	95	82.5
GC2	16	+ve	Train1	40	12	2	8	18	0	0	0	950.192	463.654	1599.73	11279	1254	476.125	2176.25	2534	815.167	458.111	1343.5	8745	39	10	20	49	949	ZZ	65	69.2308	30	0.975	0.25	0.5	1.225	23.725		Right	GC2	+ve			+ve	90	97.5	95	100
GC3	16	+ve	Train1	40	3	14	0	19	4	4	0	382	290.474	109.684	8662	0	0	0	0	382	290.474	109.684	8662	59	0	34	92	366	ZZ	47.5	100	7.5	1.475	0	0.85	2.3	9.15		Right	GC3	+ve			+ve	57.5	80	60	87.5
GE0	16	+ve	Train1	40	0	0	20	16	4	2	2	187.056	225.056	174.417	13263	247.4	231.85	187.6	7038	111.625	216.562	157.938	6225	57	32	28	48	162	ZZ	90	44.4444	0	1.425	0.8	0.7	1.2	4.05		Left	GE0	+ve			+ve	47.5	45	47.5	47.5
GE1	16	+ve	Train1	40	4	2	19	14	1	0	1	559.455	117.576	239.97	13270	617.474	150.368	140.474	7678	480.714	73.0714	375	5592	48	24	17	40	340	ZZ	82.5	42.4242	10	1.2	0.6	0.425	1	8.5		Left	GE1	+ve			+ve	95	95	90	85
GE2	16	WT	Train1	40	5	8	9	13	5	2	3	970.545	293	570.136	1479	1230.44	146.889	599.222	673	790.615	394.154	550	806	57	18	20	53	742	ZZ	55	59.0909	12.5	1.425	0.45	0.5	1.325	18.55		Right	GE2	WT			+ve	42.5	75	67.5	75
GE3	16	+ve	Train1	40	0	0	17	19	4	0	4	170.5	221.917	78.9167	14762	127.235	179.353	72.4118	6983	209.211	260	84.7368	7779	53	28	29	57	339	ZZ	90	52.7778	0	1.325	0.7	0.725	1.425	8.475		Right	GE3	+ve			+ve	35	50	47.5	52.5
GK2	16	WT	Train1	40	0	0	21	14	5	3	2	441.714	276.914	397.657	1326	409.286	225.714	355.952	914	490.357	353.714	460.214	412	49	30	18	76	389	ZZ	87.5	40	0	1.225	0.75	0.45	1.9	9.725		Left	GK2	WT			+ve	22.5	15	32.5	35
GK3	16	+ve	Train1	40	10	6	11	12	1	1	0	929.043	395.87	202.087	11913	870.182	393.636	164.636	5816	983	397.917	236.417	6097	38	15	19	33	695	ZZ	57.5	52.1739	25	0.95	0.375	0.475	0.825	17.375		Right	GK3	+ve			WT	55	72.5	67.5	75
GK4	16	+ve	Train1	40	0	9	0	19	12	12	0	596.737	328.947	156.421	10052	0	0	0	0	596.737	328.947	156.421	10052	94	0	76	80	264	ZZ	47.5	100	0	2.35	0	1.9	2	6.6		Right	GK4	+ve			WT	20	35	30	22.5
GA0	16	WT	Train1	40	2	1	18	17	2	2	0	320.543	271.886	148.029	12339	253.667	180.833	172.667	5798	391.353	368.294	121.941	6541	56	25	27	51	230	ZZ	87.5	48.5714	5	1.4	0.625	0.675	1.275	5.75		Left	GA0	WT			WT	65	65	82.5	85
GA1	16	WT	Train1	40	2	3	16	19	0	0	0	262.629	413.629	100.514	16855	204.875	460.5	96.0625	7925	311.263	374.158	104.263	8930	43	22	24	52	298	ZZ	87.5	54.2857	5	1.075	0.55	0.6	1.3	7.45		Right	GA1	WT			WT	30	47.5	30	32.5
GA2	16	+ve	Train1	40	0	0	18	20	2	1	1	242.974	203.395	810.684	1107	263.556	150.778	746.722	569	224.45	250.75	868.25	538	54	22	32	47	246	ZZ	95	.	0	1.35	0.55	0.8	1.175	6.15		Right	GA2	+ve			WT	55	65	75	62.5
GJ1	16	+ve	Train1	40	16	5	8	9	2	1	1	481.706	303.294	143.882	8279	309.5	115	126.125	3935	634.778	470.667	159.667	4344	32	12	16	21	767	ZZ	42.5	52.9412	40	0.8	0.3	0.4	0.525	19.175		Right	GJ1	+ve			WT	87.5	90	82.5	92.5
GJ3	16	WT	Train1	40	6	1	13	17	3	3	0	632.767	302.9	596.333	4989	948.231	359.923	1150.85	2137	391.529	259.294	172.294	2852	40	16	23	93	596	ZZ	75	56.6667	15	1	0.4	0.575	2.325	14.9		Right	GJ3	WT			WT	87.5	90	85	85
GG1	16	+ve	Train1	40	20	6	10	4	0	0	0	1245.79	186.143	449.214	6024	661.5	197.9	486.2	4380	2706.5	156.75	356.75	1644	28	15	13	23	859	ZZ	35	28.5714	50	0.7	0.375	0.325	0.575	21.475		Left	GG1	+ve			WT	87.5	92.5	100	95
GG2	16	+ve	Train1	40	21	10	0	9	0	0	0	1477.67	333.889	671.444	4911	0	0	0	0	1477.67	333.889	671.444	4911	25	0	14	42	398	ZZ	22.5	100	52.5	0.625	0	0.35	1.05	9.95		Right	GG2	+ve			WT	75	82.5	82.5	80
																																													1	2	3	4
WT	9		Mean	40	9.44444	3.44444	11.7778	13.2222	2.11111	1.33333	0.777778	731.609	417.334	477.763	6292.11	768.373	406.56	865.31	2796	683.299	414.449	319.777	3496.11	42	18	19.6667	56	569	#DIV/0!	62.5	55.1634	23.6111	1.05	0.45	0.491667	1.4	14.225							WT	62.5	71.1111	70.5556	70
Grb10	11		Mean	40	7.81818	4.90909	10.0909	14.4545	2.72727	1.90909	0.818182	656.647	279.11	421.496	9411.09	395.531	172.274	372.765	3539.36	783.804	294.285	410.892	5871.73	47.9091	14.3636	27.0909	48.3636	489.545	#DIV/0!	61.3636	64.2564	19.5455	1.19773	0.359091	0.677273	1.20909	12.2386							Grb10m+/p-	61.3636	70	66.8182	69.3182
			SE	0	3.3998	0.91456	2.00539	1.55258	0.633431	0.408248	0.364302	144.844	67.6297	121.209	2044.58	176.805	89.7448	425.046	933.762	127.172	55.9592	62.5017	1126.39	4.79004	2.71825	1.57233	6.59545	89.1179	#DIV/0!	8.34374	3.37682	8.4995	0.119751	0.0679563	0.0393083	0.164886	2.22795							WT	8.34374	6.70705	8.18384	8.68028
			SE	0	2.51113	1.40424	2.34115	1.6032	1.04526	1.07411	0.377026	132.41	30.2339	138.4	1246.97	123.227	46.5969	193.173	927.797	226.118	36.7345	119.485	889.263	5.83478	3.42789	5.3758	6.55088	82.7335	#DIV/0!	7.50275	8.04402	6.27783	0.145869	0.0856972	0.134395	0.163772	2.06834							Grb10m+/p-	7.50275	8.04815	6.51999	6.17998
GB0	17	WT	Train1	40	6	2	18	11	3	1	2	678.483	126.621	750.414	4214	770.056	125.778	681	2401	528.636	128	864	1813	74	36	21	61	450	ZZ	72.5	37.931	15	1.85	0.9	0.525	1.525	11.25		Left	GB0	WT
GF0	17	WT	Train1	40	24	2	5	9	0	0	0	1165.14	709.286	304.857	2749	1423.8	588.4	297.6	1066	1021.44	776.444	308.889	1683	22	7	13	34	776	ZZ	35	.	60	0.55	0.175	0.325	0.85	19.4		Right	GF0	WT
GF1	17	WT	Train1	40	9	0	12	14	5	2	3	503.654	204.462	115.731	13317	418.833	186.25	98.75	6139	576.357	220.071	130.286	7178	46	18	21	40	346	ZZ	65	53.8462	22.5	1.15	0.45	0.525	1	8.65		Right	GF1	WT
GC1	17	WT	Train1	40	16	5	7	12	0	0	0	1251.68	293	230.947	4778	1124.43	117	202.571	1501	1325.92	395.667	247.5	3277	33	10	16	57	537	ZZ	47.5	63.1579	40	0.825	0.25	0.4	1.425	13.425		Right	GC1	WT
GC2	17	+ve	Train1	40	4	3	15	18	0	0	0	526.727	408.879	218.333	17647	603.267	577.333	298.333	7057	462.944	268.5	151.667	10590	45	19	23	49	525	ZZ	82.5	54.5455	10	1.125	0.475	0.575	1.225	13.125		Right	GC2	+ve
GC3	17	+ve	Train1	40	0	12	0	19	9	9	0	331.421	86.8947	77.7895	13344	0	0	0	0	331.421	86.8947	77.7895	13344	94	0	70	61	314	ZZ	47.5	100	0	2.35	0	1.75	1.525	7.85		Right	GC3	+ve
GE0	17	+ve	Train1	40	0	0	21	16	3	1	2	211.297	147.784	174.027	13353	221.286	179.143	171.19	7613	198.188	106.625	177.75	5740	59	34	30	44	148	ZZ	92.5	43.2432	0	1.475	0.85	0.75	1.1	3.7		Left	GE0	+ve
GE1	17	+ve	Train1	40	3	0	20	16	1	0	1	679.278	154.444	132.028	15443	546.35	117.35	128.45	7991	845.438	200.812	136.5	7452	44	27	21	54	269	ZZ	90	44.4444	7.5	1.1	0.675	0.525	1.35	6.725		Left	GE1	+ve
GE2	17	WT	Train1	40	3	2	12	14	9	3	6	499.423	368.346	561.038	2826	627.25	411.083	498.917	1251	389.857	331.714	614.286	1575	51	26	34	50	614	ZZ	65	53.8462	7.5	1.275	0.65	0.85	1.25	15.35		Right	GE2	WT
GE3	17	+ve	Train1	40	0	0	17	22	1	0	1	118.128	133.359	78	17272	111.471	112	74.1176	7504	123.273	149.864	81	9768	47	23	38	40	342	ZZ	97.5	56.4103	0	1.175	0.575	0.95	1	8.55		Right	GE3	+ve
GK2	17	WT	Train1	40	0	0	23	13	4	1	3	684.583	190.306	377.389	926	757.826	119.696	316.957	524	555	315.231	484.308	402	52	52	20	74	458	ZZ	90	36.1111	0	1.3	1.3	0.5	1.85	11.45		Left	GK2	WT
GK3	17	+ve	Train1	40	3	0	15	17	5	4	1	552.75	209.875	193.25	19352	574.467	206.4	142.533	9732	533.588	212.941	238	9620	57	18	30	40	421	ZZ	80	53.125	7.5	1.425	0.45	0.75	1	10.525		Right	GK3	+ve
GK4	17	+ve	Train1	40	1	3	0	18	18	18	0	282.167	80.7778	109.722	9404	0	0	0	0	282.167	80.7778	109.722	9404	112	0	88	33	217	ZZ	45	100	2.5	2.8	0	2.2	0.825	5.425		Right	GK4	+ve
GA0	17	WT	Train1	40	0	0	22	14	4	0	4	317.472	101.944	126.778	13611	322.5	72.8636	144.364	8216	309.571	147.643	99.1429	5395	68	35	25	42	171	ZZ	90	38.8889	0	1.7	0.875	0.625	1.05	4.275		Left	GA0	WT
GA1	17	WT	Train1	40	0	2	19	18	1	0	1	360.027	220	116.514	18227	354.737	245.737	127.263	9319	365.611	192.833	105.167	8908	53	26	20	42	233	ZZ	92.5	48.6486	0	1.325	0.65	0.5	1.05	5.825		Left	GA1	WT
GA2	17	+ve	Train1	40	0	0	18	20	2	1	1	258.342	96.8421	575.868	1075	179.222	77.6111	544	551	329.55	114.15	604.55	524	45	31	30	57	177	ZZ	95	.	0	1.125	0.775	0.75	1.425	4.425		Right	GA2	+ve
GJ1	17	+ve	Train1	40	5	4	15	15	1	1	0	315.267	205.9	114.1	13173	376.867	98.8667	119.067	6701	253.667	312.933	109.133	6472	41	22	31	33	508	ZZ	75	50	12.5	1.025	0.55	0.775	0.825	12.7		Right	GJ1	+ve
GJ3	17	WT	Train1	40	0	0	15	18	7	4	3	376	269.091	140.485	8192	485.533	279.733	125.467	3581	284.722	260.222	153	4611	53	29	35	100	291	ZZ	82.5	54.5455	0	1.325	0.725	0.875	2.5	7.275		Right	GJ3	WT
GG1	17	+ve	Train1	40	13	4	15	5	3	1	2	1126.4	394.25	163.35	9479	1323.07	224.133	142.8	7376	536.4	904.6	225	2103	35	24	14	27	690	ZZ	50	25	32.5	0.875	0.6	0.35	0.675	17.25		Left	GG1	+ve
GG2	17	+ve	Train1	40	25	7	0	6	2	2	0	681.333	335.667	172	5697	0	0	0	0	681.333	335.667	172	5697	20	0	14	21	376	ZZ	15	100	62.5	0.5	0	0.35	0.525	9.4		Right	GG2	+ve
WT	9		Mean	40	6.44444	1.44444	14.7778	13.6667	3.66667	1.22222	2.44444	648.497	275.895	302.684	7648.89	698.329	238.505	276.988	3777.56	595.235	307.536	334.064	3871.33	50.2222	26.5556	22.7778	55.5556	430.667	#DIV/0!	71.1111	48.3719	16.1111	1.25556	0.663889	0.569444	1.38889	10.7667
Grb10	11		Mean	40	4.90909	3	12.3636	15.6364	4.09091	3.36364	0.727273	462.101	204.97	182.588	12294.5	357.818	144.803	147.317	4956.82	416.179	252.16	189.374	7337.64	54.4545	18	35.3636	41.7273	362.455	#DIV/0!	70	62.6768	12.2727	1.36136	0.45	0.884091	1.04318	9.06136
			SE	0	2.84854	0.555556	2.10672	0.986013	1.0274	0.493789	0.647884	114.456	60.6456	74.9818	2015.13	123.845	55.9906	66.1199	1101.9	117.55	65.5246	89.1276	956.403	5.28567	4.63115	2.48203	6.92442	64.3847	#DIV/0!	6.70705	3.25141	7.12136	0.132142	0.115779	0.0620509	0.17311	1.60962
			SE	0	2.31381	1.14416	2.47266	1.62521	1.58088	1.66391	0.237062	87.5249	36.4967	41.68	1656.46	119.473	49.5165	47.901	1175.43	65.8764	70.5925	44.4807	1135.68	7.9731	3.76104	6.97694	3.83546	49.6847	#DIV/0!	8.04815	8.2057	5.78453	0.199327	0.0940261	0.174423	0.0958865	1.24212
GB0	18	WT	Train1	40	6	1	16	11	6	0	6	559.296	115.852	573.185	5392	744.938	98.75	736.688	3310	289.273	140.727	335.364	2082	53	41	20	66	323	ZZ	67.5	40.7407	15	1.325	1.025	0.5	1.65	8.075		Left	GB0	WT
GF0	18	WT	Train1	40	22	3	9	3	3	0	3	655.5	298.167	307.917	1584	680.444	323.889	259.111	1369	580.667	221	454.333	215	22	20	4	63	671	ZZ	30	.	55	0.55	0.5	0.1	1.575	16.775		Left	GF0	WT
GF1	18	WT	Train1	40	2	1	14	19	4	2	2	430.242	93.9697	125.273	16039	550.071	98.6429	108.643	6846	341.947	90.5263	137.526	9193	53	22	29	35	238	ZZ	82.5	57.5758	5	1.325	0.55	0.725	0.875	5.95		Right	GF1	WT
GC1	18	WT	Train1	40	24	4	7	5	0	0	0	1552	474	190.333	1929	1316.86	405.429	198	905	1881.2	570	179.6	1024	21	8	7	36	397	ZZ	30	41.6667	60	0.525	0.2	0.175	0.9	9.925		Left	GC1	WT
GC2	18	+ve	Train1	40	7	3	10	19	1	1	0	927.724	292.069	1033.69	11567	594	355.5	215.3	4695	1103.37	258.684	1464.42	6872	50	18	26	38	674	ZZ	72.5	65.5172	17.5	1.25	0.45	0.65	0.95	16.85		Right	GC2	+ve
GC3	18	+ve	Train1	40	0	8	0	19	13	13	0	237.526	57.1053	81.2632	15703	0	0	0	0	237.526	57.1053	81.2632	15703	71	0	59	44	209	ZZ	47.5	100	0	1.775	0	1.475	1.1	5.225		Right	GC3	+ve
GE0	18	+ve	Train1	40	0	0	14	18	8	6	2	190.688	114.531	167.875	10796	158.5	86.2857	174.5	4539	215.722	136.5	162.722	6257	59	21	42	37	129	ZZ	80	56.25	0	1.475	0.525	1.05	0.925	3.225		Right	GE0	+ve
GE1	18	+ve	Train1	40	2	0	21	17	0	0	0	418.658	142.211	128.684	16412	400.381	103.81	127.095	9218	441.235	189.647	130.647	7194	58	24	24	44	241	ZZ	95	44.7368	5	1.45	0.6	0.6	1.1	6.025		Left	GE1	+ve
GE2	18	WT	Train1	40	0	4	17	13	6	4	2	553.133	228.267	829.133	2326	352	219.353	489.765	1572	816.154	239.923	1272.92	754	52	33	25	45	576	ZZ	75	43.3333	0	1.3	0.825	0.625	1.125	14.4		Left	GE2	WT
GE3	18	+ve	Train1	40	0	0	17	21	2	0	2	172.947	150.132	80.3158	17251	189.529	193.059	75.2941	7821	159.524	115.381	84.381	9430	48	26	27	40	314	ZZ	95	55.2632	0	1.2	0.65	0.675	1	7.85		Right	GE3	+ve
GK2	18	WT	Train1	40	0	0	21	12	7	0	7	379.061	139.97	268.515	831	443.714	121.095	236.333	500	265.917	173	324.833	331	46	44	12	80	259	ZZ	82.5	36.3636	0	1.15	1.1	0.3	2	6.475		Left	GK2	WT
GK3	18	+ve	Train1	40	9	1	10	14	6	4	2	955.5	278.542	203.458	16375	981.4	321.8	227.1	7073	937	247.643	186.571	9302	38	23	31	27	586	ZZ	60	58.3333	22.5	0.95	0.575	0.775	0.675	14.65		Right	GK3	+ve
GK4	18	+ve	Train1	40	0	3	0	19	18	18	0	273.789	67.5263	139.579	10143	0	0	0	0	273.789	67.5263	139.579	10143	107	0	139	30	110	ZZ	47.5	100	0	2.675	0	3.475	0.75	2.75		Right	GK4	+ve
GA0	18	WT	Train1	40	0	0	15	19	6	3	3	145.206	98.5294	104.324	12565	96.3333	85.4	112.4	5462	183.789	108.895	97.9474	7103	78	40	34	37	101	ZZ	85	55.8824	0	1.95	1	0.85	0.925	2.525		Right	GA0	WT
GA1	18	WT	Train1	40	0	0	19	21	0	0	0	152.425	160.9	93.825	19719	146.421	81.7895	86.7368	9550	157.857	232.476	100.238	10169	69	21	28	49	126	ZZ	100	52.5	0	1.725	0.525	0.7	1.225	3.15		Right	GA1	WT
GA2	18	+ve	Train1	40	0	0	22	14	4	0	4	220.972	111.806	585.333	1182	242.5	108	582.591	698	187.143	117.786	589.643	484	43	28	22	58	154	ZZ	90	.	0	1.075	0.7	0.55	1.45	3.85		Left	GA2	+ve
GJ1	18	+ve	Train1	40	8	1	17	10	4	1	3	348.259	177	107.556	10405	343.765	143.471	120.529	6631	355.9	234	85.5	3774	43	25	12	32	558	ZZ	67.5	37.037	20	1.075	0.625	0.3	0.8	13.95		Left	GJ1	+ve
GJ3	18	WT	Train1	40	0	0	18	15	7	4	3	329.545	176.939	110.303	7630	292.278	260.889	101	4165	374.267	76.2	121.467	3465	56	31	21	114	304	ZZ	82.5	45.4545	0	1.4	0.775	0.525	2.85	7.6		Left	GJ3	WT
GG1	18	+ve	Train1	40	13	4	11	8	4	2	2	1633.68	384.842	163.316	10171	1217.09	342.909	139.182	5780	2206.5	442.5	196.5	4391	38	23	36	76	907	ZZ	47.5	42.1053	32.5	0.95	0.575	0.9	1.9	22.675		Left	GG1	+ve
GG2	18	+ve	Train1	40	8	11	0	13	8	8	0	707.154	441.077	169.615	10602	0	0	0	0	707.154	441.077	169.615	10602	57	0	32	22	244	ZZ	32.5	100	20	1.425	0	0.8	0.55	6.1		Right	GG2	+ve
WT	9		Mean	40	6	1.44444	15.1111	13.1111	4.33333	1.44444	2.88889	528.49	198.51	289.201	7557.22	513.673	188.36	258.742	3742.11	543.452	205.861	336.026	3815.11	50	28.8889	20	58.3333	332.778	#DIV/0!	70.5556	46.6896	15	1.25	0.722222	0.5	1.45833	8.31944
Grb10	11		Mean	40	4.27273	2.81818	11.0909	15.6364	6.18182	4.81818	1.36364	553.355	201.531	260.062	11873.4	375.197	150.439	151.054	4223.18	620.442	209.804	299.168	7650.18	55.6364	17.0909	40.9091	40.7273	375.091	#DIV/0!	66.8182	65.9243	10.6818	1.39091	0.427273	1.02273	1.01818	9.37727
			SE	0	3.28295	0.580017	1.52247	2.07126	0.927961	0.603488	0.789593	140.69	40.7866	84.4883	2326.13	124.545	39.8381	73.0686	1024.63	180.825	49.9352	124.392	1320.2	6.2849	3.98764	3.44803	8.66987	63.4104	#DIV/0!	8.18384	2.57217	8.20738	0.157123	0.0996909	0.0862007	0.216747	1.58526
			SE	0	1.44657	1.10221	2.46228	1.25244	1.62267	1.80815	0.432177	138.743	38.8834	88.0525	1380.62	122.368	41.155	49.7743	1046.6	185.605	40.3128	124.095	1226.33	5.97308	3.39908	10.4651	4.5887	79.5676	#DIV/0!	6.51999	7.5205	3.61642	0.149327	0.0849769	0.261626	0.114718	1.98919
GB0	19	WT	Train1	40	2	0	21	9	8	0	8	267.2	100.9	181.867	8667	250.476	53.2381	146.714	6094	306.222	212.111	263.889	2573	57	41	12	60	151	ZZ	75	30	5	1.425	1.025	0.3	1.5	3.775		Left	GB0	WT
GF0	19	WT	Train1	40	26	3	4	5	2	0	2	840.222	420.111	305.111	570	653.5	368.75	348.75	304	989.6	461.2	270.2	266	23	9	10	36	827	ZZ	22.5	.	65	0.575	0.225	0.25	0.9	20.675		Right	GF0	WT
GF1	19	WT	Train1	40	4	0	16	18	2	1	1	418.618	195	117.176	21181	303.125	137.75	101.688	10623	521.278	245.889	130.944	10558	47	29	24	36	234	ZZ	85	52.9412	10	1.175	0.725	0.6	0.9	5.85		Right	GF1	WT
GC1	19	WT	Train1	40	19	5	3	10	3	2	1	849.769	613.846	305.462	2537	1066.67	758	225.333	800	784.7	570.6	329.5	1737	28	6	17	33	456	ZZ	32.5	76.9231	47.5	0.7	0.15	0.425	0.825	11.4		Right	GC1	WT
GC2	19	+ve	Train1	40	5	1	10	20	4	4	0	354.933	135.5	262.433	15942	650.9	298.2	223.1	4881	206.95	54.15	282.1	11061	49	16	35	37	446	ZZ	75	66.6667	12.5	1.225	0.4	0.875	0.925	11.15		Right	GC2	+ve
GC3	19	+ve	Train1	40	0	2	0	19	19	19	0	127.105	50.7368	76.0526	16068	0	0	0	0	127.105	50.7368	76.0526	16068	65	0	58	39	159	ZZ	47.5	100	0	1.625	0	1.45	0.975	3.975		Right	GC3	+ve
GE0	19	+ve	Train1	40	0	0	16	14	10	6	4	362.433	64.3	219.833	5052	452.75	72.5625	206.25	3308	259.214	54.8571	235.357	1744	49	25	27	59	168	ZZ	75	46.6667	0	1.225	0.625	0.675	1.475	4.2		Left	GE0	+ve
GE1	19	+ve	Train1	40	1	0	22	11	6	0	6	255.97	104.515	109.303	15789	274.682	88.6818	107.591	10740	218.545	136.182	112.727	5049	51	37	17	36	172	ZZ	82.5	33.3333	2.5	1.275	0.925	0.425	0.9	4.3		Left	GE1	+ve
GE2	19	WT	Train1	40	5	3	17	8	7	0	7	411.48	169.08	480.52	2255	391.882	114.353	497.706	1740	453.125	285.375	444	515	51	41	17	37	551	ZZ	62.5	32	12.5	1.275	1.025	0.425	0.925	13.775		Left	GE2	WT
GE3	19	+ve	Train1	40	0	0	17	23	0	0	0	156.45	125.95	76.1	19112	130.294	124.412	73.0588	8286	175.783	127.087	78.3478	10826	53	19	29	41	292	ZZ	100	57.5	0	1.325	0.475	0.725	1.025	7.3		Right	GE3	+ve
GK2	19	WT	Train1	40	0	0	23	14	3	1	2	410.514	127	273.351	956	397.13	79.4783	198.826	415	432.5	205.071	395.786	541	50	36	19	98	369	ZZ	92.5	37.8378	0	1.25	0.9	0.475	2.45	9.225		Left	GK2	WT
GK3	19	+ve	Train1	40	2	1	19	16	2	0	2	596.886	248.286	168.229	19101	381.105	268.053	139.211	11206	853.125	224.812	202.688	7895	42	33	25	39	353	ZZ	87.5	45.7143	5	1.05	0.825	0.625	0.975	8.825		Left	GK3	+ve
GK4	19	+ve	Train1	40	0	1	0	19	20	20	0	152.632	63.5789	142.526	13944	0	0	0	0	152.632	63.5789	142.526	13944	87	0	111	27	100	ZZ	47.5	100	0	2.175	0	2.775	0.675	2.5		Right	GK4	+ve
GA0	19	WT	Train1	40	0	0	17	17	6	5	1	252.912	77.4412	138.029	9687	181.059	78.0588	167	4209	324.765	76.8235	109.059	5478	57	21	37	43	106	ZZ	85	50	0	1.425	0.525	0.925	1.075	2.65		Right	GA0	WT
GA1	19	WT	Train1	40	0	0	19	19	2	1	1	129.053	83.4737	100.842	20914	168.842	75.5263	96.3158	10242	89.2632	91.4211	105.368	10672	63	30	24	39	107	ZZ	95	50	0	1.575	0.75	0.6	0.975	2.675		Right	GA1	WT
GA2	19	+ve	Train1	40	1	0	18	16	5	0	5	226.941	72.7353	646.735	1223	252.278	54.6667	664.944	648	198.438	93.0625	626.25	575	42	29	23	53	196	ZZ	85	.	2.5	1.05	0.725	0.575	1.325	4.9		Left	GA2	+ve
GJ1	19	+ve	Train1	40	5	1	16	14	4	1	3	253.3	122.267	98.4333	12066	198.812	112	111.812	6207	315.571	134	83.1429	5859	44	27	21	37	372	ZZ	75	46.6667	12.5	1.1	0.675	0.525	0.925	9.3		Left	GJ1	+ve
GJ3	19	WT	Train1	40	0	0	11	21	8	8	0	337.344	116.781	118.688	6996	308.727	210.182	110.545	2377	352.333	67.8571	122.952	4619	52	22	37	104	360	ZZ	80	65.625	0	1.3	0.55	0.925	2.6	9		Right	GJ3	WT
GG1	19	+ve	Train1	40	11	3	13	8	5	1	4	1053.95	251.619	133.19	10798	1092	167	106.538	6761	992.125	389.125	176.5	4037	43	34	45	59	776	ZZ	52.5	38.0952	27.5	1.075	0.85	1.125	1.475	19.4		Left	GG1	+ve
GG2	19	+ve	Train1	40	14	5	0	14	7	7	0	701.357	169.643	171	9780	0	0	0	0	701.357	169.643	171	9780	41	0	34	30	283	ZZ	35	100	35	1.025	0	0.85	0.75	7.075		Right	GG2	+ve
WT	9		Mean	40	6.22222	1.22222	14.5556	13.4444	4.55556	2	2.55556	435.235	211.515	224.561	8195.89	413.49	208.371	210.32	4089.33	472.643	246.261	241.3	4106.56	47.5556	26.1111	21.8889	54	351.222	#DIV/0!	70	49.4159	15.5556	1.18889	0.652778	0.547222	1.35	8.78056
Grb10	11		Mean	40	3.54545	1.27273	11.9091	15.8182	7.45455	5.27273	2.18182	385.633	128.103	191.258	12625	312.075	107.78	148.41	4730.64	381.895	136.112	198.79	7894.36	51.4545	20	38.6364	41.5455	301.545	#DIV/0!	69.3182	63.4643	8.86364	1.28636	0.5	0.965909	1.03864	7.53864
			SE	0	3.19191	0.640698	2.36943	1.87906	0.883665	0.912871	0.959038	83.5092	61.2576	42.2108	2667.02	94.9111	76.0986	44.5325	1352.35	89.7528	57.7711	43.4977	1370.31	4.47248	4.25717	3.25083	9.27661	79.1672	#DIV/0!	8.68028	5.41431	7.97977	0.111812	0.106429	0.0812708	0.231915	1.97918
			SE	0	1.46078	0.468865	2.48433	1.29206	1.95571	2.25264	0.698286	86.634	21.1833	48.7942	1699.54	99.5745	30.8993	56.595	1289.24	93.7526	30.274	47.2711	1489.67	4.13052	4.29164	8.04789	3.26236	57.2647	#DIV/0!	6.17998	8.09118	3.65196	0.103263	0.107291	0.201197	0.0815589	1.43162
GB1	20	WT	Train1	40	24	9	1	6	0	0	0	1688.71	438.571	226.429	1331	266	523	196	114	1925.83	424.5	231.5	1217	20	1	7	20	588	ZZ	17.5	85.7143	60	0.5	0.025	0.175	0.5	14.7		Right	GB1	WT
GC0	20	+ve	Train1	40	1	4	12	8	15	6	9	1088.6	779.25	290.9	21546	978	848.917	343.667	13722	1254.5	674.75	211.75	7824	82	61	37	74	473	ZZ	50	40	2.5	2.05	1.525	0.925	1.85	11.825		Left	GC0	+ve
GK1	20	WT	Train1	40	8	2	15	11	4	2	2	956.731	592.846	5599.85	3776	974.4	561.8	4412.6	2583	932.636	635.182	7218.82	1193	57	29	29	66	1628	ZZ	65	42.3077	20	1.425	0.725	0.725	1.65	40.7		Left	GK1	WT
GJ2	20	+ve	Train1	40	1	2	18	15	4	2	2	794.394	390.515	134.576	20901	844.667	377.278	124.333	10820	734.067	406.4	146.867	10081	63	38	26	46	415	ZZ	82.5	45.4545	2.5	1.575	0.95	0.65	1.15	10.375		Left	GJ2	+ve
WT	2		Mean	40	16	5.5	8	8.5	2	1	1	1322.72	515.709	2913.14	2553.5	620.2	542.4	2304.3	1348.5	1429.23	529.841	3725.16	1205	38.5	15	18	43	1108	#DIV/0!	41.25	64.011	40	0.9625	0.375	0.45	1.075	27.7
Grb10	2		Mean	40	1	3	15	11.5	9.5	4	5.5	941.497	584.883	212.738	21223.5	911.333	613.097	234	12271	994.283	540.575	179.308	8952.5	72.5	49.5	31.5	60	444	#DIV/0!	66.25	42.7273	2.5	1.8125	1.2375	0.7875	1.5	11.1
			SE	0	8	3.5	7	2.5	2	1	1	365.992	77.1374	2686.71	1222.5	354.2	19.4	2108.3	1234.5	496.598	105.341	3493.66	12	18.5	14	11	23	520	#DIV/0!	23.75	21.7033	20	0.4625	0.35	0.275	0.575	13
			SE	0	0	1	3	3.5	5.5	2	3.5	147.103	194.367	78.1621	322.5	66.6667	235.819	109.667	1451	260.217	134.175	32.4417	1128.5	9.5	11.5	5.5	14	29	#DIV/0!	16.25	2.72727	0	0.2375	0.2875	0.1375	0.35	0.725
GB1	21	WT	Train1	40	20	7	4	9	0	0	0	1541.85	555.846	217.923	4320	796	336	181.5	1181	1873.33	653.556	234.111	3139	30	8	15	46	634	ZZ	32.5	69.2308	50	0.75	0.2	0.375	1.15	15.85		Right	GB1	WT
GC0	21	+ve	Train1	40	2	3	11	10	14	6	8	1158	634.333	318.81	15658	1212.91	825.091	351.727	8299	1097.6	424.5	282.6	7359	66	48	38	67	407	ZZ	52.5	47.619	5	1.65	1.2	0.95	1.675	10.175		Left	GC0	+ve
GK1	21	WT	Train1	40	16	5	11	4	4	1	3	1119.47	486.533	1893.4	1569	1159.45	371	1378.82	1004	1009.5	804.25	3308.5	565	32	28	15	32	867	ZZ	37.5	26.6667	40	0.8	0.7	0.375	0.8	21.675		Left	GK1	WT
GJ2	21	+ve	Train1	40	2	3	14	12	9	4	5	1033.81	493.154	157.923	18306	793.786	571.786	153.571	9655	1313.83	401.417	163	8651	77	39	33	29	416	ZZ	65	46.1538	5	1.925	0.975	0.825	0.725	10.4		Left	GJ2	+ve
WT	2		Mean	40	18	6	7.5	6.5	2	0.5	1.5	1330.66	521.19	1055.66	2944.5	977.727	353.5	780.159	1092.5	1441.42	728.903	1771.31	1852	31	18	15	39	750.5	#DIV/0!	35	47.9487	45	0.775	0.45	0.375	0.975	18.7625
Grb10	2		Mean	40	2	3	12.5	11	11.5	5	6.5	1095.9	563.744	238.366	16982	1003.35	698.438	252.649	8977	1205.72	412.958	222.8	8005	71.5	43.5	35.5	48	411.5	#DIV/0!	58.75	46.8864	5	1.7875	1.0875	0.8875	1.2	10.2875
			SE	0	2	1	3.5	2.5	2	0.5	1.5	211.19	34.6564	837.738	1375.5	181.727	17.5	598.659	88.5	431.917	75.3472	1537.19	1287	1	10	0	7	116.5	#DIV/0!	2.5	21.2821	5	0.025	0.25	0	0.175	2.9125
			SE	0	0	0	1.5	1	2.5	1	1.5	62.0962	70.5897	80.4432	1324	209.562	126.653	99.0779	678	108.117	11.5417	59.8	646	5.5	4.5	2.5	19	4.5	#DIV/0!	6.25	0.732601	0	0.1375	0.1125	0.0625	0.475	0.1125
GB1	22	WT	Train1	40	24	7	2	7	0	0	0	1434.11	512.667	281	2425	2072.5	163.5	339	454	1251.71	612.429	264.429	1971	20	3	13	32	500	ZZ	22.5	77.7778	60	0.5	0.075	0.325	0.8	12.5		Right	GB1	WT
GC0	22	+ve	Train1	40	0	0	10	12	18	9	9	684.818	408.409	321.955	18790	786.7	806.1	271	8879	599.917	77	364.417	9911	59	58	62	45	226	ZZ	55	54.5455	0	1.475	1.45	1.55	1.125	5.65		Right	GC0	+ve
GK1	22	WT	Train1	40	6	2	19	7	6	0	6	765.5	270.692	3597.23	2954	779.263	178.158	3364.42	2293	728.143	521.857	4229.14	661	45	42	15	38	962	ZZ	65	26.9231	15	1.125	1.05	0.375	0.95	24.05		Left	GK1	WT
GJ2	22	+ve	Train1	40	5	1	16	10	8	3	5	945.308	427.462	140.885	17179	759.562	438.75	137.562	10340	1242.5	409.4	146.2	6839	62	47	20	30	385	ZZ	65	38.4615	12.5	1.55	1.175	0.5	0.75	9.625		Left	GJ2	+ve
WT	2		Mean	40	15	4.5	10.5	7	3	0	3	1099.81	391.679	1939.12	2689.5	1425.88	170.829	1851.71	1373.5	989.929	567.143	2246.79	1316	32.5	22.5	14	35	731	#DIV/0!	43.75	52.3504	37.5	0.8125	0.5625	0.35	0.875	18.275
Grb10	2		Mean	40	2.5	0.5	13	11	13	6	7	815.063	417.935	231.42	17984.5	773.131	622.425	204.281	9609.5	921.208	243.2	255.308	8375	60.5	52.5	41	37.5	305.5	#DIV/0!	60	46.5035	6.25	1.5125	1.3125	1.025	0.9375	7.6375
			SE	0	9	2.5	8.5	0	3	0	3	334.306	120.987	1658.12	264.5	646.618	7.32895	1512.71	919.5	261.786	45.2857	1982.36	655	12.5	19.5	1	3	231	#DIV/0!	21.25	25.4274	22.5	0.3125	0.4875	0.025	0.075	5.775
			SE	0	2.5	0.5	3	1	5	3	2	130.245	9.52622	90.535	805.5	13.5688	183.675	66.7188	730.5	321.292	166.2	109.108	1536	1.5	5.5	21	7.5	79.5	#DIV/0!	5	8.04196	6.25	0.0375	0.1375	0.525	0.1875	1.9875
GB1	23	WT	Train1	40	30	3	1	3	3	2	1	2400	264.75	8666	1211	706	807	134	455	2964.67	84	11510	756	13	5	13	8	591	ZZ	10	75	75	0.325	0.125	0.325	0.2	14.775		Right	GB1	WT
GC0	23	+ve	Train1	40	0	1	2	15	22	16	6	991.647	108.059	195.176	12787	1036.5	482.5	275	2107	985.667	58.1333	184.533	10680	55	49	48	26	211	ZZ	42.5	88.2353	0	1.375	1.225	1.2	0.65	5.275		Right	GC0	+ve
GK1	23	WT	Train1	40	12	0	17	7	4	0	4	1094.38	146.583	1303.58	1920	843.118	88.1765	1640.53	1253	1704.57	288.429	485.286	667	45	41	13	42	703	ZZ	60	29.1667	30	1.125	1.025	0.325	1.05	17.575		Left	GK1	WT
GJ2	23	+ve	Train1	40	3	2	14	12	9	4	5	838.538	314.423	141.615	19382	808.071	354.786	133.857	10365	874.083	267.333	150.667	9017	67	41	26	28	376	ZZ	65	46.1538	7.5	1.675	1.025	0.65	0.7	9.4		Left	GJ2	+ve
WT	2		Mean	40	21	1.5	9	5	3.5	1	2.5	1747.19	205.667	4984.79	1565.5	774.559	447.588	887.265	854	2334.62	186.214	5997.64	711.5	29	23	13	25	647	#DIV/0!	35	52.0833	52.5	0.725	0.575	0.325	0.625	16.175
Grb10	2		Mean	40	1.5	1.5	8	13.5	15.5	10	5.5	915.093	211.241	168.396	16084.5	922.286	418.643	204.429	6236	929.875	162.733	167.6	9848.5	61	45	37	27	293.5	#DIV/0!	53.75	67.1946	3.75	1.525	1.125	0.925	0.675	7.3375
			SE	0	9	1.5	8	2	0.5	1	1.5	652.812	59.0833	3681.21	354.5	68.5588	359.412	753.265	399	630.048	102.214	5512.36	44.5	16	18	0	17	56	#DIV/0!	25	22.9167	22.5	0.4	0.45	0	0.425	1.4
			SE	0	1.5	0.5	6	1.5	6.5	6	0.5	76.5543	103.182	26.7805	3297.5	114.214	63.8571	70.5714	4129	55.7917	104.6	16.9333	831.5	6	4	11	1	82.5	#DIV/0!	11.25	21.0407	3.75	0.15	0.1	0.275	0.025	2.0625
Final session
BE0	19	+ve	Train1																										ZZ	#DIV/0!	#DIV/0!	#DIV/0!	#DIV/0!	#DIV/0!	#DIV/0!	#DIV/0!	#DIV/0!		Right	BE0	+ve
BE2	23	+ve	Train1																										ZZ	#DIV/0!	#DIV/0!	#DIV/0!	#DIV/0!	#DIV/0!	#DIV/0!	#DIV/0!	#DIV/0!		Right	BE2	+ve
BF1	19	+ve	Train1																										ZZ	#DIV/0!	#DIV/0!	#DIV/0!	#DIV/0!	#DIV/0!	#DIV/0!	#DIV/0!	#DIV/0!		Right	BF1	+ve
BH2	19	WT	Train1																										ZZ	#DIV/0!	#DIV/0!	#DIV/0!	#DIV/0!	#DIV/0!	#DIV/0!	#DIV/0!	#DIV/0!		Right	BH2	WT
BH3	19	WT	Train1																										ZZ	#DIV/0!	#DIV/0!	#DIV/0!	#DIV/0!	#DIV/0!	#DIV/0!	#DIV/0!	#DIV/0!		Right	BH3	WT
BI0	19	WT	Train1																										ZZ	#DIV/0!	#DIV/0!	#DIV/0!	#DIV/0!	#DIV/0!	#DIV/0!	#DIV/0!	#DIV/0!		Right	BI0	WT
BI1	19	+ve	Train1																										ZZ	#DIV/0!	#DIV/0!	#DIV/0!	#DIV/0!	#DIV/0!	#DIV/0!	#DIV/0!	#DIV/0!		Right	BI1	+ve
BI2	#REF!	+ve	Train1																																				Right	BI2	+ve
BJ0	19	+ve	Train1																										ZZ	#DIV/0!	#DIV/0!	#DIV/0!	#DIV/0!	#DIV/0!	#DIV/0!	#DIV/0!	#DIV/0!		Right	BJ0	+ve
BJ1	23	+ve	Train1																										ZZ	#DIV/0!	#DIV/0!	#DIV/0!	#DIV/0!	#DIV/0!	#DIV/0!	#DIV/0!	#DIV/0!		Right	BJ1	+ve
BL0	19	+ve	Train1																										ZZ	#DIV/0!	#DIV/0!	#DIV/0!	#DIV/0!	#DIV/0!	#DIV/0!	#DIV/0!	#DIV/0!		Right	BL0	+ve
BL1	19	+ve	Train1																										ZZ	#DIV/0!	#DIV/0!	#DIV/0!	#DIV/0!	#DIV/0!	#DIV/0!	#DIV/0!	#DIV/0!		Right	BL1	+ve
BM0	19	WT	Train1																										ZZ	#DIV/0!	#DIV/0!	#DIV/0!	#DIV/0!	#DIV/0!	#DIV/0!	#DIV/0!	#DIV/0!		Right	BM0	WT
BM1	23	WT	Train1																										ZZ	#DIV/0!	#DIV/0!	#DIV/0!	#DIV/0!	#DIV/0!	#DIV/0!	#DIV/0!	#DIV/0!		Right	BM1	WT
BN0	19	+ve	Train1																										ZZ	#DIV/0!	#DIV/0!	#DIV/0!	#DIV/0!	#DIV/0!	#DIV/0!	#DIV/0!	#DIV/0!		Right	BN0	+ve
BN1	19	+ve	Train1																										ZZ	#DIV/0!	#DIV/0!	#DIV/0!	#DIV/0!	#DIV/0!	#DIV/0!	#DIV/0!	#DIV/0!		Right	BN1	+ve
BN2	19	+ve	Train1																										ZZ	#DIV/0!	#DIV/0!	#DIV/0!	#DIV/0!	#DIV/0!	#DIV/0!	#DIV/0!	#DIV/0!		Right	BN2	+ve
BP1	19	WT	Train1																										ZZ	#DIV/0!	#DIV/0!	#DIV/0!	#DIV/0!	#DIV/0!	#DIV/0!	#DIV/0!	#DIV/0!		Right	BP1	WT
BP2	19	WT	Train1																										ZZ	#DIV/0!	#DIV/0!	#DIV/0!	#DIV/0!	#DIV/0!	#DIV/0!	#DIV/0!	#DIV/0!		Right	BP2	WT
BQ0	19	WT	Train1																										ZZ	#DIV/0!	#DIV/0!	#DIV/0!	#DIV/0!	#DIV/0!	#DIV/0!	#DIV/0!	#DIV/0!		Right	BQ0	WT
BQ1	19	+ve	Train1																										ZZ	#DIV/0!	#DIV/0!	#DIV/0!	#DIV/0!	#DIV/0!	#DIV/0!	#DIV/0!	#DIV/0!		Right	BQ1	+ve
BT0	23	WT	Train1																										ZZ	#DIV/0!	#DIV/0!	#DIV/0!	#DIV/0!	#DIV/0!	#DIV/0!	#DIV/0!	#DIV/0!		Right	BT0	WT
BT1	19	WT	Train1																										ZZ	#DIV/0!	#DIV/0!	#DIV/0!	#DIV/0!	#DIV/0!	#DIV/0!	#DIV/0!	#DIV/0!		Right	BT1	WT
BT3	19	WT	Train1																										ZZ	#DIV/0!	#DIV/0!	#DIV/0!	#DIV/0!	#DIV/0!	#DIV/0!	#DIV/0!	#DIV/0!		Right	BT3	WT
BU1	19	+ve	Train1																										ZZ	#DIV/0!	#DIV/0!	#DIV/0!	#DIV/0!	#DIV/0!	#DIV/0!	#DIV/0!	#DIV/0!		Right	BU1	+ve
BU2	#REF!	+ve	Train1																										ZZ	#DIV/0!	#DIV/0!	#DIV/0!	#DIV/0!	#DIV/0!	#DIV/0!	#DIV/0!	#DIV/0!		Right	BU2	+ve
BU3	#REF!	+ve	Train1																										ZZ	#DIV/0!	#DIV/0!	#DIV/0!	#DIV/0!	#DIV/0!	#DIV/0!	#DIV/0!	#DIV/0!		Right	BU3	+ve
WT	11		Mean	#DIV/0!	#DIV/0!	#DIV/0!	#DIV/0!	#DIV/0!	#DIV/0!	#DIV/0!	#DIV/0!	#DIV/0!	#DIV/0!	#DIV/0!	#DIV/0!	#DIV/0!	#DIV/0!	#DIV/0!	#DIV/0!	#DIV/0!	#DIV/0!	#DIV/0!	#DIV/0!	#DIV/0!	#DIV/0!	#DIV/0!	#DIV/0!	#DIV/0!		#DIV/0!	#DIV/0!	#DIV/0!	#DIV/0!	#DIV/0!	#DIV/0!	#DIV/0!	#DIV/0!
Tau	16		Mean	#DIV/0!	#DIV/0!	#DIV/0!	#DIV/0!	#DIV/0!	#DIV/0!	#DIV/0!	#DIV/0!	#DIV/0!	#DIV/0!	#DIV/0!	#DIV/0!	#DIV/0!	#DIV/0!	#DIV/0!	#DIV/0!	#DIV/0!	#DIV/0!	#DIV/0!	#DIV/0!	#DIV/0!	#DIV/0!	#DIV/0!	#DIV/0!	#DIV/0!		#DIV/0!	#DIV/0!	#DIV/0!	#DIV/0!	#DIV/0!	#DIV/0!	#DIV/0!	#DIV/0!
			SE	#DIV/0!	#DIV/0!	#DIV/0!	#DIV/0!	#DIV/0!	#DIV/0!	#DIV/0!	#DIV/0!	#DIV/0!	#DIV/0!	#DIV/0!	#DIV/0!	#DIV/0!	#DIV/0!	#DIV/0!	#DIV/0!	#DIV/0!	#DIV/0!	#DIV/0!	#DIV/0!	#DIV/0!	#DIV/0!	#DIV/0!	#DIV/0!	#DIV/0!		#DIV/0!	#DIV/0!	#DIV/0!	#DIV/0!	#DIV/0!	#DIV/0!	#DIV/0!	#DIV/0!
			SE	#DIV/0!	#DIV/0!	#DIV/0!	#DIV/0!	#DIV/0!	#DIV/0!	#DIV/0!	#DIV/0!	#DIV/0!	#DIV/0!	#DIV/0!	#DIV/0!	#DIV/0!	#DIV/0!	#DIV/0!	#DIV/0!	#DIV/0!	#DIV/0!	#DIV/0!	#DIV/0!	#DIV/0!	#DIV/0!	#DIV/0!	#DIV/0!	#DIV/0!		#DIV/0!	#DIV/0!	#DIV/0!	#DIV/0!	#DIV/0!	#DIV/0!	#DIV/0!	#DIV/0!

## Sheet: E0-First
Grb10 - DelRei									First E0 session				Delays are : Adjusted=1s, non-adjusted=1s in all blocks									FE0F										The following data are responses/zone (as in parts of each trial):								Z0:Initiation Stimulus on, Z1: Choice stimuli on, Z2: in delay to reward, Z3:Reward delivery, Z4: In ITI
																	All latencines are in s				All latencines are in s				All latencines are in s
				% Responses				All		Responses				% (AD/NA)	Latency to Initiate (CP)				Latency to respond (NP)			Latency to collect			Duration of first eat (PP)			Number of NPs				All NPs						Centre NPs only						Adjusted NPs only
Subject	Session	Gtype	Task	DNS	Omits	AD	NA	Bias	Trials	DNS	Omits	AD	NA	Bias	All	Omits	AD	NA	All	AD	NA	All	AD	NA	All	AD	NA	All	Centre	AD	NA	0	1	2	3	4	5	0	1	2	3	4	5	0	1	2	3	4	5
Choice - B1		C1
GB0	20	WT	E0	0	0	87.5	12.5	0.875	8	0	0	7	1	0.875	376.5	0	369	429	91.875	92.7143	86	222.75	237.857	117	102.875	69.2857	338	54	27	14	13	8	9	11	2	6	18	8	1	7	1	2	8	0	7	2	1	0	4
GB1	24	WT	E0	75	0	12.5	12.5	0.125	8	6	0	1	1	0.5	1999	0	2063	1935	121.5	66	177	585	680	490	105.5	170	41	6	2	2	2	3	2	1	0	0	0	2	0	0	0	0	0	1	1	0	0	0	0
GF0	20	WT	E0	12.5	0	50	37.5	0.5	8	1	0	4	3	0.571429	1438.43	0	1431	1448.33	276.429	245.25	318	588	735.75	391	165.286	178.25	148	27	10	10	7	10	10	4	0	0	3	7	3	0	0	0	0	1	4	3	0	0	2
GF1	20	WT	E0	0	0	75	25	0.75	8	0	0	6	2	0.75	246	0	284.667	130	147.875	173.5	71	102.75	102.333	104	713.25	816	405	45	22	12	11	9	10	5	0	0	21	8	2	3	0	0	9	1	6	2	0	0	3
GC0	24	+ve	E0	0	0	87.5	12.5	0.875	8	0	0	7	1	0.875	346.5	0	203.571	1347	135.5	72.4286	577	134.75	124.143	209	1116.12	1190	599	41	16	14	11	12	10	2	1	0	16	8	2	1	0	0	5	0	7	1	1	0	5
GC1	20	WT	E0	0	0	25	75	0.25	8	0	0	2	6	0.25	904.125	0	806	936.833	254.375	812.5	68.3333	226	489.5	138.167	146.125	54	176.833	24	11	5	8	11	10	0	1	0	2	8	2	0	1	0	0	2	2	0	0	0	1
GC2	20	+ve	E0	0	0	37.5	62.5	0.375	8	0	0	3	5	0.375	645	0	718.667	600.8	87.25	64.3333	101	425.125	858	165.4	415.125	356.333	450.4	24	13	4	7	8	10	2	0	0	4	8	2	0	0	0	3	0	3	0	0	0	1
GC3	20	+ve	E0	0	0	100	0	1	8	0	0	8	0	1	352.25	0	352.25	0	50.125	50.125	0	85.875	85.875	0	1545.75	1545.75	0	53	17	36	0	10	11	6	0	0	26	8	3	0	0	0	6	2	8	6	0	0	20
GE0	20	+ve	E0	0	0	12.5	87.5	0.125	8	0	0	1	7	0.125	517.125	0	284	550.429	68.5	52	70.8571	141	170	136.857	285.5	421	266.143	69	29	24	16	8	10	13	2	0	36	8	2	8	0	0	11	0	1	4	2	0	17
GE1	20	+ve	E0	0	0	87.5	12.5	0.875	8	0	0	7	1	0.875	293.875	0	236.714	694	95.75	102.714	47	103.375	102.714	108	950.625	999.857	606	53	28	21	4	8	9	7	1	0	28	8	1	4	0	0	15	0	7	2	1	0	11
GE2	20	WT	E0	0	0	75	25	0.75	8	0	0	6	2	0.75	391.25	0	388	401	144.75	117.833	225.5	347.375	374.333	266.5	236.25	241.667	220	54	19	23	12	9	10	8	1	0	26	8	2	0	1	0	8	1	6	6	0	0	10
GE3	20	+ve	E0	0	0	62.5	37.5	0.625	8	0	0	5	3	0.625	100.5	0	85	126.333	123.75	152	76.6667	144.625	36.4	325	583.875	836.4	163	49	20	14	15	10	8	3	0	0	28	8	0	2	0	0	10	0	5	1	0	0	8
GK1	24	WT	E0	0	0	100	0	1	8	0	0	8	0	1	1116.12	0	1116.12	0	419.5	419.5	0	589.75	589.75	0	131.5	131.5	0	19	9	8	2	10	9	0	0	0	0	8	1	0	0	0	0	0	8	0	0	0	0
GK2	20	WT	E0	0	0	62.5	37.5	0.625	8	0	0	5	3	0.625	227.25	0	257.2	177.333	90.75	78.2	111.667	579.75	846.8	134.667	24.75	32.2	12.3333	37	21	11	5	9	8	6	1	0	13	8	0	3	1	0	9	1	5	2	0	0	3
GK3	20	+ve	E0	0	0	62.5	37.5	0.625	8	0	0	5	3	0.625	547.375	0	383.8	820	128.625	174.4	52.3333	169.375	194	128.333	724.875	939.6	367	37	11	19	7	11	8	3	0	0	15	8	0	1	0	0	2	0	5	2	0	0	12
GK4	20	+ve	E0	0	0	100	0	1	8	0	0	8	0	1	193.375	0	193.375	0	100.375	100.375	0	129	129	0	1038.75	1038.75	0	86	35	51	0	10	10	7	3	0	56	8	2	2	1	0	22	2	8	5	2	0	34
GA0	20	WT	E0	0	0	75	25	0.75	8	0	0	6	2	0.75	523.25	0	558.5	417.5	84.25	76.6667	107	151.25	169.167	97.5	173.25	165.667	196	47	23	13	11	8	11	1	0	6	21	8	3	1	0	2	9	0	6	0	0	0	7
GA1	20	WT	E0	0	0	25	75	0.25	8	0	0	2	6	0.25	377.125	0	575.5	311	65.75	90	57.6667	103.25	107.5	101.833	549.875	1127.5	357.333	49	27	8	14	8	11	6	3	0	21	8	3	2	3	0	11	0	2	0	0	0	6
GA2	20	+ve	E0	0	0	87.5	12.5	0.875	8	0	0	7	1	0.875	217.75	0	202.714	323	221.875	200.143	374	1150.75	1248.71	465	30.25	33.5714	7	61	26	15	20	8	8	8	2	0	35	8	0	4	1	0	13	0	7	4	1	0	3
GJ1	20	+ve	E0	0	0	50	50	0.5	8	0	0	4	4	0.5	785.125	0	348.5	1221.75	308.875	155.75	462	98	108.75	87.25	499.5	681.75	317.25	26	13	7	6	9	8	1	0	0	8	8	0	1	0	0	4	0	4	0	0	0	3
GJ2	24	+ve	E0	0	0	62.5	37.5	0.625	8	0	0	5	3	0.625	680.5	0	692.4	660.667	274.5	285.4	256.333	120.875	114.6	131.333	956.75	1264	444.667	36	15	14	7	13	13	3	1	0	6	8	5	0	0	0	2	4	5	2	1	0	2
GJ3	20	WT	E0	0	0	50	50	0.5	8	0	0	4	4	0.5	229.5	0	229.75	229.25	94.125	64.75	123.5	166	210.25	121.75	196.125	200.25	192	46	16	12	18	16	8	2	3	0	17	8	0	1	0	0	7	0	4	0	1	0	7
GG1	20	+ve	E0	12.5	0	37.5	50	0.375	8	1	0	3	4	0.428571	1732.57	0	1076.67	2224.5	488.143	156.667	736.75	132.143	110.667	148.25	580.429	854.667	374.75	34	15	9	10	15	10	2	0	0	7	7	3	1	0	0	4	5	3	0	0	0	1
GG2	20	+ve	E0	0	0	100	0	1	8	0	0	8	0	1	576.375	0	576.375	0	176	176	0	131.375	131.375	0	950.625	950.625	0	34	19	15	0	9	12	0	0	0	13	8	4	0	0	0	7	1	8	0	0	0	6
WT	11		Mean	7.95455	0	57.9545	34.0909	0.579545	8	0.636364	0	4.63636	2.72727	0.62013	711.687	0	734.431	583.205	162.834	203.356	122.333	332.898	413.022	178.402	231.344	289.665	189.682	37.0909	17	10.7273	9.36364	9.18182	8.90909	4	1	1.09091	12.9091	7.36364	1.54545	1.54545	0.636364	0.363636	5.54545	0.636364	4.63636	1.36364	0.181818	0	3.90909
Grb10	13		Mean	0.961538	0	68.2692	30.7692	0.682692	8	0.0769231	0	5.46154	2.46154	0.686813	537.563	0	411.849	659.114	173.79	134.026	211.842	228.174	262.634	146.494	744.475	854.793	276.555	46.3846	19.7692	18.6923	7.92308	10.0769	9.76923	4.38462	0.769231	0	21.3846	7.92308	1.84615	1.84615	0.153846	0	8	1.07692	5.46154	2.07692	0.615385	0	9.46154
			SE	6.79922	0	8.47334	7.36448	0.0847334	0	0.543937	0	0.677867	0.589158	0.0716753	176.647	0	175.697	183.276	33.0252	68.9281	26.6775	63.6659	81.0896	43.7279	62.8817	105.607	41.4369	4.78721	2.44206	1.63535	1.52716	0.922627	0.756241	1.07872	0.356753	0.731804	2.95559	0.543937	0.365902	0.651762	0.278722	0.243935	1.35756	0.203279	0.677867	0.576395	0.121967	0	0.976585
			SE	0.961538	0	7.83128	7.57116	0.0783128	0	0.0769231	0	0.626502	0.605693	0.0770619	115.062	0	77.5814	178.717	34.0516	19.0338	68.7528	80.4399	100.354	36.48	111.492	112.37	62.305	4.9595	2.05736	3.50528	1.76309	0.604063	0.440772	1.00345	0.280883	0	4.21465	0.0769231	0.450728	0.638971	0.104154	0	1.6525	0.473145	0.626502	0.571341	0.21299	0	2.64966
Choice - B2		C2
GB0	20	WT	E0	25	0	37.5	37.5	0.375	8	2	0	3	3	0.5	1165.67	0	1176.33	1155	111.833	92.6667	131	1208.67	241	2176.33	220.167	271.333	169	24	15	5	4	6	11	4	0	0	3	6	5	2	0	0	2	0	3	1	0	0	1
GB1	24	WT	E0	62.5	12.5	25	0	0.25	8	5	1	2	0	1	2142.33	2112	2157.5	0	98	98	0	388.5	388.5	0	62.5	62.5	0	10	3	6	1	3	2	3	0	0	2	3	0	0	0	0	0	0	2	3	0	0	1
GF0	20	WT	E0	100	0	0	0	0	8	8	0	0	0	0	0	0	0	0	0	0	0	0	0	0	0	0	0	0	0	0	0	0	0	0	0	0	0	0	0	0	0	0	0	0	0	0	0	0	0
GF1	20	WT	E0	25	0	75	0	0.75	8	2	0	6	0	1	1150.17	0	1150.17	0	520.5	520.5	0	118.5	118.5	0	1088.33	1088.33	0	15	8	7	0	6	6	3	0	0	0	6	0	2	0	0	0	0	6	1	0	0	0
GC0	24	+ve	E0	0	0	100	0	1	8	0	0	8	0	1	772.5	0	772.5	0	54.75	54.75	0	70	70	0	1109.12	1109.12	0	43	19	12	12	18	8	0	0	0	17	8	0	0	0	0	11	3	8	0	0	0	1
GC1	20	WT	E0	50	37.5	0	12.5	0	8	4	3	0	1	0	2475.25	3150.67	0	449	123	0	123	90	0	90	208	0	208	5	4	0	1	4	1	0	0	0	0	4	0	0	0	0	0	0	0	0	0	0	0
GC2	20	+ve	E0	12.5	0	62.5	25	0.625	8	1	0	5	2	0.714286	1435.57	0	1475.2	1336.5	282	113.6	703	540.857	582	438	465.429	538.2	283.5	22	8	8	6	10	8	1	0	2	1	7	1	0	0	0	0	2	5	0	0	0	1
GC3	20	+ve	E0	0	0	100	0	1	8	0	0	8	0	1	409.375	0	409.375	0	82.375	82.375	0	78.625	78.625	0	1464.88	1464.88	0	25	12	13	0	8	10	3	0	0	4	8	2	0	0	0	2	0	8	3	0	0	2
GE0	20	+ve	E0	0	0	62.5	37.5	0.625	8	0	0	5	3	0.625	1009.62	0	621.2	1657	125.75	85	193.667	159.625	168.6	144.667	308.25	338.4	258	40	19	13	8	8	12	0	1	0	19	8	4	0	1	0	6	0	5	0	0	0	8
GE1	20	+ve	E0	0	0	87.5	12.5	0.875	8	0	0	7	1	0.875	599.875	0	603.857	572	147.375	85.8571	578	91.875	83.4286	151	773.625	830.714	374	22	10	9	3	8	10	2	0	0	2	8	2	0	0	0	0	0	7	2	0	0	0
GE2	20	WT	E0	37.5	0	50	12.5	0.5	8	3	0	4	1	0.8	944.8	0	661.5	2078	177	173.5	191	2358	2882.75	259	59.8	19.25	222	14	6	4	4	8	5	0	0	0	1	5	0	0	0	0	1	0	4	0	0	0	0
GE3	20	+ve	E0	0	0	50	50	0.5	8	0	0	4	4	0.5	200.25	0	78.75	321.75	213.75	230.5	197	209.875	269	150.75	475.375	659.25	291.5	33	18	6	9	9	11	3	0	0	10	8	3	1	0	0	6	1	4	0	0	0	1
GK1	24	WT	E0	62.5	0	37.5	0	0.375	8	5	0	3	0	1	1872.67	0	1872.67	0	550.333	550.333	0	3221.33	3221.33	0	30.3333	30.3333	0	9	5	3	1	4	5	0	0	0	0	3	2	0	0	0	0	0	3	0	0	0	0
GK2	20	WT	E0	0	0	25	75	0.25	8	0	0	2	6	0.25	586.5	0	455	630.333	106.75	80	115.667	351.375	657.5	249.333	28.125	15.5	32.3333	41	16	7	18	9	9	3	1	0	19	8	1	2	0	0	5	0	2	0	0	0	5
GK3	20	+ve	E0	12.5	25	37.5	25	0.375	8	1	2	3	2	0.6	1020.29	837.5	1086	1104.5	334.8	326.667	347	181.4	172.333	195	714.4	948.667	363	21	10	8	3	11	7	2	0	0	1	7	2	1	0	0	0	4	3	1	0	0	0
GK4	20	+ve	E0	0	0	100	0	1	8	0	0	8	0	1	261.625	0	261.625	0	228.875	228.875	0	189.25	189.25	0	963.75	963.75	0	128	62	66	0	11	16	13	12	0	76	8	8	7	7	0	32	3	8	6	5	0	44
GA0	20	WT	E0	0	0	37.5	62.5	0.375	8	0	0	3	5	0.375	774.125	0	1492.33	343.2	222.625	163	258.4	194.25	163	213	229.875	160.333	271.6	51	22	10	19	9	14	6	2	2	18	8	6	0	0	0	8	1	3	3	0	1	2
GA1	20	WT	E0	0	0	25	75	0.25	8	0	0	2	6	0.25	488.375	0	551.5	467.333	224.75	137	254	106.125	77	115.833	556	1302	307.333	23	10	6	7	8	8	2	0	0	5	8	0	1	0	0	1	0	2	1	0	0	3
GA2	20	+ve	E0	12.5	0	87.5	0	0.875	8	1	0	7	0	1	244.429	0	244.429	0	140.714	140.714	0	2319.71	2319.71	0	56.4286	56.4286	0	30	12	9	9	8	8	3	0	1	10	7	1	1	0	0	3	0	7	2	0	0	0
GJ1	20	+ve	E0	62.5	37.5	0	0	0	8	5	3	0	0	0	1163.67	1163.67	0	0	0	0	0	0	0	0	0	0	0	6	3	3	0	4	0	0	0	0	2	3	0	0	0	0	0	1	0	0	0	0	2
GJ2	24	+ve	E0	50	0	37.5	12.5	0.375	8	4	0	3	1	0.75	1785	0	1450.67	2788	320	274	458	160.75	149.667	194	872	1040	368	13	7	4	2	4	7	2	0	0	0	4	3	0	0	0	0	0	3	1	0	0	0
GJ3	20	WT	E0	0	0	62.5	37.5	0.625	8	0	0	5	3	0.625	493.625	0	465.2	541	154	131.8	191	188.375	219.4	136.667	124.75	118.8	134.667	23	8	7	8	10	8	0	0	2	3	8	0	0	0	0	0	0	5	0	0	2	0
GG1	20	+ve	E0	25	12.5	37.5	25	0.375	8	2	1	3	2	0.6	1581.83	1043	2255.67	840.5	434.2	277	670	195.6	183.333	214	563.8	770	254.5	19	8	4	7	8	5	3	0	1	2	6	0	2	0	0	0	0	3	1	0	0	0
GG2	20	+ve	E0	87.5	12.5	0	0	0	8	7	1	0	0	0	3086	3086	0	0	0	0	0	0	0	0	0	0	0	7	4	3	0	4	3	0	0	0	0	1	3	0	0	0	0	3	0	0	0	0	0
WT	11		Mean	32.9545	4.54545	34.0909	28.4091	0.340909	8	2.63636	0.363636	2.72727	2.27273	0.527273	1099.41	478.424	907.473	514.897	208.072	176.982	114.915	747.739	724.453	294.561	237.08	278.944	122.267	19.5455	8.81818	5	5.72727	6.09091	6.27273	1.90909	0.272727	0.363636	4.63636	5.36364	1.27273	0.636364	0	0	1.54545	0.0909091	2.72727	0.818182	0	0.272727	1.09091
Grb10	13		Mean	20.1923	6.73077	58.6538	14.4231	0.586538	8	1.61538	0.538462	4.69231	1.15385	0.666484	1043.85	471.551	712.251	663.096	181.891	146.103	242.051	322.89	328.15	114.417	597.466	670.724	168.654	31.4615	14.7692	12.1538	4.53846	8.53846	8.07692	2.46154	1	0.307692	11.0769	6.38462	2.23077	0.923077	0.615385	0	4.61538	1.30769	4.69231	1.23077	0.384615	0	4.53846
			SE	10.0103	3.48402	6.96805	9.24584	0.0696805	0	0.800826	0.278722	0.557444	0.739667	0.116309	232.131	328.488	217.464	189.823	52.337	56.1363	30.8452	325.141	352.266	190.617	97.4523	139.566	36.1901	4.61295	1.96246	0.924416	2.07185	0.928876	1.29398	0.624566	0.194978	0.243935	2.12463	0.800826	0.661828	0.278722	0	0	0.790439	0.0909091	0.557444	0.352089	0	0.194978	0.494599
			SE	7.94846	3.35392	9.84501	4.66123	0.0984501	0	0.635877	0.268313	0.787601	0.372898	0.0955534	223.815	250.334	189.507	239.468	37.351	30.3417	76.8793	170.597	170.975	36.6525	123.833	128.179	46.2694	8.62437	4.19425	4.59493	1.15811	1.03537	1.12353	0.944725	0.919866	0.174848	5.69577	0.635877	0.600788	0.536627	0.537545	0	2.47173	0.414243	0.787601	0.482433	0.384615	0	3.34284
Choice - B3		C3
GB0	20	WT	E0	25	0	50	25	0.5	8	2	0	4	2	0.666667	757.167	0	935.75	400	103.5	115	80.5	322	379	208	187.167	251.75	58	38	17	9	12	6	10	16	0	0	6	6	4	7	0	0	0	0	4	4	0	0	1
GB1	24	WT	E0	75	12.5	12.5	0	0.125	8	6	1	1	0	1	2155	3357	953	0	97	97	0	424	424	0	205	205	0	10	3	5	2	7	1	0	0	0	2	2	0	0	0	0	1	3	1	0	0	0	1
GF0	20	WT	E0	87.5	12.5	0	0	0	8	7	1	0	0	0	3528	3528	0	0	0	0	0	0	0	0	0	0	0	1	1	0	0	1	0	0	0	0	0	1	0	0	0	0	0	0	0	0	0	0	0
GF1	20	WT	E0	100	0	0	0	0	8	8	0	0	0	0	0	0	0	0	0	0	0	0	0	0	0	0	0	5	0	2	3	3	0	0	0	0	2	0	0	0	0	0	0	0	0	0	0	0	2
GC0	24	+ve	E0	50	25	25	0	0.25	8	4	2	2	0	1	631	363.5	898.5	0	306	306	0	206.5	206.5	0	812	812	0	34	15	10	9	7	3	0	0	0	24	4	1	0	0	0	10	0	2	0	0	0	8
GC1	20	WT	E0	87.5	0	12.5	0	0.125	8	7	0	1	0	1	1207	0	1207	0	597	597	0	7223	7223	0	4	4	0	5	1	3	1	2	1	0	0	0	2	1	0	0	0	0	0	1	1	0	0	0	1
GC2	20	+ve	E0	25	0	37.5	37.5	0.375	8	2	0	3	3	0.5	866.333	0	772.333	960.333	549.5	206.333	892.667	2362.33	4464.67	260	148.5	61.3333	235.667	15	6	6	3	6	6	2	0	0	1	6	0	0	0	0	0	0	3	2	0	0	1
GC3	20	+ve	E0	0	0	100	0	1	8	0	0	8	0	1	889.25	0	889.25	0	116.75	116.75	0	88.625	88.625	0	1213.25	1213.25	0	32	12	20	0	10	12	5	1	0	4	8	4	0	0	0	0	2	8	5	1	0	4
GE0	20	+ve	E0	12.5	0	62.5	25	0.625	8	1	0	5	2	0.714286	1857.29	0	1873	1818	300	388.4	79	225	232.6	206	257.429	280.4	200	37	14	16	7	7	8	6	2	0	14	7	1	0	0	0	6	0	5	5	1	0	5
GE1	20	+ve	E0	25	12.5	25	37.5	0.25	8	2	1	2	3	0.4	1317.67	1072	1401	1344	627.4	803	510.333	331.2	575.5	168.333	601.2	857.5	430.333	16	7	3	6	7	6	2	0	0	1	6	1	0	0	0	0	0	2	0	0	0	1
GE2	20	WT	E0	62.5	25	12.5	0	0.125	8	5	2	1	0	1	2340.33	2357.5	2306	0	81	81	0	3135	3135	0	116	116	0	12	8	3	1	4	2	0	0	0	6	3	1	0	0	0	4	1	1	0	0	0	1
GE3	20	+ve	E0	0	0	50	50	0.5	8	0	0	4	4	0.5	411.25	0	279.25	543.25	202.875	185.25	220.5	220.5	275	166	373.125	476.5	269.75	23	11	5	7	8	8	0	0	0	7	8	0	0	0	0	3	0	4	0	0	0	1
GK1	24	WT	E0	75	0	25	0	0.25	8	6	0	2	0	1	2188.5	0	2188.5	0	92.5	92.5	0	26792.5	26792.5	0	33	33	0	9	4	4	1	4	3	1	0	0	1	2	1	0	0	0	1	1	2	1	0	0	0
GK2	20	WT	E0	0	0	25	75	0.25	8	0	0	2	6	0.25	245.75	0	385.5	199.167	83.375	59	91.5	183.25	368.5	121.5	18.125	14	19.5	36	15	9	12	10	8	2	0	0	16	8	0	2	0	0	5	2	2	0	0	0	5
GK3	20	+ve	E0	37.5	12.5	50	0	0.5	8	3	1	4	0	1	1939.8	1292	2101.75	0	967.75	967.75	0	275.5	275.5	0	643	643	0	15	5	7	3	9	4	1	0	0	1	5	0	0	0	0	0	2	4	1	0	0	0
GK4	20	+ve	E0	25	0	75	0	0.75	8	2	0	6	0	1	123.167	0	123.167	0	170.667	170.667	0	170.5	170.5	0	1106	1106	0	84	49	35	0	9	14	10	5	0	46	6	8	5	3	0	27	3	6	5	2	0	19
GA0	20	WT	E0	0	0	62.5	37.5	0.625	8	0	0	5	3	0.625	997.875	0	1154.6	736.667	421.125	565	181.333	184.875	220.2	126	173.75	153.4	207.667	31	10	14	7	8	9	5	3	1	5	8	1	0	0	0	1	0	5	4	3	0	2
GA1	20	WT	E0	12.5	0	37.5	50	0.375	8	1	0	3	4	0.428571	811.857	0	979.667	686	621.857	732.667	538.75	126.571	146	112	708	1205.33	335	21	13	3	5	7	12	2	0	0	0	7	5	1	0	0	0	0	3	0	0	0	0
GA2	20	+ve	E0	0	0	62.5	37.5	0.625	8	0	0	5	3	0.625	528.625	0	534.4	519	91.25	87.6	97.3333	2194	2338.4	1953.33	47.5	43.8	53.6667	30	13	8	9	9	10	2	0	0	9	8	2	0	0	0	3	0	5	2	0	0	1
GJ1	20	+ve	E0	62.5	25	0	12.5	0	8	5	2	0	1	0	1755.67	1051	0	3165	915	0	915	258	0	258	730	0	730	7	3	2	2	5	1	0	0	0	1	3	0	0	0	0	0	2	0	0	0	0	0
GJ2	24	+ve	E0	87.5	12.5	0	0	0	8	7	1	0	0	0	3780	3780	0	0	0	0	0	0	0	0	0	0	0	3	1	2	0	3	0	0	0	0	0	1	0	0	0	0	0	2	0	0	0	0	0
GJ3	20	WT	E0	0	0	75	25	0.75	8	0	0	6	2	0.75	956.375	0	1019.5	767	184.75	150.667	287	262.375	297.667	156.5	198.75	216.5	145.5	21	10	7	4	10	9	1	0	0	1	8	1	0	0	0	1	1	6	0	0	0	0
GG1	20	+ve	E0	50	12.5	25	12.5	0.25	8	4	1	2	1	0.666667	2214.5	2577	2804	673	914.667	1155	434	129.667	138	113	628	775.5	333	18	4	6	8	10	3	1	0	0	4	4	0	0	0	0	0	3	2	1	0	0	0
GG2	20	+ve	E0	75	12.5	12.5	0	0.125	8	6	1	1	0	1	3132.5	2880	3385	0	95	95	0	449	449	0	617	617	0	5	2	3	0	4	1	0	0	0	0	2	0	0	0	0	0	2	1	0	0	0	0
WT	11		Mean	47.7273	4.54545	28.4091	19.3182	0.284091	8	3.81818	0.363636	2.27273	1.54545	0.610931	1380.71	840.227	1011.77	253.53	207.464	226.348	107.189	3513.96	3544.17	65.8182	149.436	199.908	69.6061	17.1818	7.45455	5.36364	4.36364	5.63636	5	2.45455	0.272727	0.0909091	3.72727	4.18182	1.18182	0.909091	0	0	1.18182	0.818182	2.27273	0.818182	0.272727	0	1.18182
Grb10	13		Mean	34.6154	8.65385	40.3846	16.3462	0.403846	8	2.76923	0.692308	3.23077	1.30769	0.646612	1495.93	1001.19	1158.59	694.045	404.374	344.75	242.218	531.602	708.792	240.359	552.077	529.714	173.263	24.5385	10.9231	9.46154	4.15385	7.23077	5.84615	2.23077	0.615385	0	8.61538	5.23077	1.30769	0.384615	0.230769	0	3.76923	1.23077	3.23077	1.61538	0.307692	0	3.07692
			SE	12.133	2.54099	7.5549	7.79052	0.075549	0	0.970643	0.203279	0.604392	0.623241	0.11825	316.909	442.187	224.988	99.7349	68.9749	80.4983	51.6958	2420.46	2416.39	23.986	61.5895	104.612	33.9746	3.94466	1.81591	1.2156	1.29526	0.927094	1.3817	1.42933	0.272727	0.0909091	1.39539	0.970643	0.519058	0.638956	0	0	0.519058	0.295979	0.604392	0.482761	0.272727	0	0.443502
			SE	8.02563	2.60386	8.27147	5.17804	0.0827147	0	0.64205	0.208309	0.661717	0.414243	0.100316	303.27	360.27	303.103	263.194	96.9116	105.949	94.2074	217.353	355.429	145.658	104.543	117.37	62.5269	5.83932	3.43896	2.59836	1.00541	0.621762	1.21869	0.840893	0.400936	0	3.65944	0.64205	0.64435	0.384615	0.230769	0	2.11573	0.342574	0.661717	0.572203	0.174848	0	1.49126
Forced - B1		F1		DNS	Omits	Left	Right	Inco	Trials	DNS	Omits	Left	Right	Inco
GB0	20	WT	E0	0	0	50	50	0.5	4	0	0	2	2	0	358.5	0	240	477	126.5	131.5	121.5	383	536.5	229.5	135.5	126.5	144.5	37	17	14	6	4	5	6	0	0	22	4	1	1	0	0	11	0	2	3	0	0	9
GB1	24	WT	E0	25	50	0	25	0	4	1	2	0	1	0	1582	1874.5	0	997	58	0	58	387	0	387	76	0	76	8	3	3	2	6	1	1	0	0	0	3	0	0	0	0	0	3	0	0	0	0	0
GF0	20	WT	E0	0	25	25	25	0.25	4	0	1	1	1	1	1695.75	892	2902	1502	370	199	541	652.5	1113	192	121	81	161	18	8	4	6	6	5	1	0	0	6	4	2	0	0	0	2	0	2	0	0	0	2
GF1	20	WT	E0	0	0	50	25	0.5	4	0	0	2	1	1	154.75	0	193	122	117	72.5	206	107.667	88	147	910	1148	434	27	12	9	6	6	5	2	0	0	14	4	1	1	0	0	6	2	3	0	0	0	4
GC0	24	+ve	E0	0	0	50	0	0.5	4	0	0	2	0	2	819.5	0	553	0	59	59	0	209	209	0	1187	1187	0	23	8	9	6	9	4	0	1	0	9	4	0	0	0	0	4	1	4	0	1	0	3
GC1	20	WT	E0	0	0	50	50	0.5	4	0	0	2	2	0	756	0	212	1300	198.5	265	132	146.5	145.5	147.5	83.25	55	111.5	10	5	3	2	4	4	2	0	0	0	4	0	1	0	0	0	0	2	1	0	0	0
GC2	20	+ve	E0	0	0	50	50	0.5	4	0	0	2	2	0	237	0	151	323	54.5	43	66	602.75	944	261.5	289.25	327	251.5	33	20	11	2	4	5	2	1	0	21	4	1	0	1	0	14	0	2	2	0	0	7
GC3	20	+ve	E0	0	0	50	0	0.5	4	0	0	2	0	2	503.5	0	492	0	49	49	0	83.5	83.5	0	1705.5	1705.5	0	27	10	17	0	4	7	2	0	0	14	4	3	0	0	0	3	0	4	2	0	0	11
GE0	20	+ve	E0	0	0	50	50	0.5	4	0	0	2	2	0	463.25	0	85	841.5	96	142.5	49.5	187.5	174.5	200.5	324	383	265	45	19	12	14	4	6	3	1	0	31	4	2	2	0	0	11	0	2	0	1	0	9
GE1	20	+ve	E0	0	0	50	50	0.5	4	0	0	2	2	0	211	0	57	365	57.5	40.5	74.5	98.25	94.5	102	833.75	1150.5	517	43	25	12	6	4	4	5	0	0	30	4	0	3	0	0	18	0	2	2	0	0	8
GE2	20	WT	E0	0	0	50	25	0.5	4	0	0	2	1	1	203.25	0	30.5	710	151.667	205	45	524.333	626.5	320	202.333	244	119	49	19	17	13	6	6	3	1	2	31	4	2	0	1	1	11	2	3	2	0	0	10
GE3	20	+ve	E0	0	0	50	50	0.5	4	0	0	2	2	0	216.75	0	324	109.5	94.25	93	95.5	98.5	115.5	81.5	682.25	941.5	423	33	21	4	8	4	4	4	1	0	20	4	0	2	1	0	14	0	2	0	0	0	2
GK1	24	WT	E0	0	0	50	50	0.5	4	0	0	2	2	0	816	0	704	928	423.25	57	789.5	603.25	851	355.5	114	100.5	127.5	28	10	8	10	6	5	2	0	0	15	4	1	0	0	0	5	1	2	1	0	0	4
GK2	20	WT	E0	0	0	50	50	0.5	4	0	0	2	2	0	818.75	0	597.5	1040	81	100	62	537.25	945	129.5	17	10.5	23.5	17	8	4	5	4	5	1	0	0	7	4	1	0	0	0	3	0	2	0	0	0	2
GK3	20	+ve	E0	0	0	25	25	0.25	4	0	0	1	1	2	325.75	0	656	325	246	72	420	121	58	184	661	1025	297	21	11	7	3	4	5	1	0	0	11	4	1	1	0	0	5	0	2	0	0	0	5
GK4	20	+ve	E0	0	25	50	0	0.5	4	0	1	2	0	1	309	174	284	0	47.5	47.5	0	99.5	99.5	0	871.5	871.5	0	49	29	20	0	4	9	0	0	0	36	4	6	0	0	0	19	0	3	0	0	0	17
GA0	20	WT	E0	0	0	50	50	0.5	4	0	0	2	2	0	395.25	0	485.5	305	112	95.5	128.5	185.25	238	132.5	231.75	198.5	265	34	16	4	14	4	5	4	1	0	20	4	1	1	0	0	10	0	2	1	0	0	1
GA1	20	WT	E0	0	0	50	50	0.5	4	0	0	2	2	0	97.5	0	100	95	96.75	123	70.5	116	118.5	113.5	703.75	990	417.5	46	22	18	6	5	4	4	0	0	33	4	0	0	0	0	18	1	2	2	0	0	13
GA2	20	+ve	E0	0	0	50	50	0.5	4	0	0	2	2	0	126.25	0	43	209.5	92.25	107.5	77	858.75	1269.5	448	31	23	39	29	17	5	7	4	4	0	1	0	20	4	0	0	1	0	12	0	2	0	0	0	3
GJ1	20	+ve	E0	0	0	50	50	0.5	4	0	0	2	2	0	269.75	0	352.5	187	304.25	264.5	344	128.5	100.5	156.5	429.5	577.5	281.5	22	9	6	7	5	4	4	0	0	9	4	0	0	0	0	5	1	2	1	0	0	2
GJ2	24	+ve	E0	0	0	50	50	0.5	4	0	0	2	2	0	898.75	0	919.5	878	173	225.5	120.5	132	107	157	881.75	1281.5	482	12	5	5	2	4	4	2	0	0	2	4	0	0	0	0	1	0	2	2	0	0	1
GJ3	20	WT	E0	0	0	25	25	0.25	4	0	0	1	1	2	239	0	43	376	269.5	451	88	241.5	230	253	184	362	6	18	9	4	5	4	5	1	0	0	8	4	1	1	0	0	3	0	2	0	0	0	2
GG1	20	+ve	E0	0	0	50	50	0.5	4	0	0	2	2	0	243.25	0	160	326.5	187.75	39	336.5	87.25	83.5	91	547.75	789.5	306	16	6	6	4	6	4	4	0	0	2	4	0	1	0	0	1	2	2	2	0	0	0
GG2	20	+ve	E0	0	25	50	0	0.5	4	0	1	2	0	1	703.5	377	1058	0	57	57	0	138.5	138.5	0	1153.5	1153.5	0	21	14	7	0	5	5	1	0	0	10	4	2	0	0	0	8	1	3	1	0	0	2
WT	11		Mean	2.27273	6.81818	40.9091	38.6364	0.409091	4	0.0909091	0.272727	1.63636	1.54545	0.454545	646.977	251.5	500.682	713.818	182.197	154.5	203.818	353.114	444.727	218.818	252.598	301.455	171.409	26.5455	11.7273	8	6.81818	5	4.54545	2.45455	0.181818	0.181818	14.1818	3.90909	0.909091	0.454545	0.0909091	0.0909091	6.27273	0.818182	2	0.909091	0	0	4.27273
Grb10	13		Mean	0	3.84615	48.0769	32.6923	0.480769	4	0	0.153846	1.92308	1.30769	0.615385	409.788	42.3846	395	274.231	116.769	95.3846	121.808	218.846	267.5	129.385	738.288	878.154	220.154	28.7692	14.9231	9.30769	4.53846	4.69231	5	2.15385	0.384615	0	16.5385	4	1.15385	0.692308	0.230769	0	8.84615	0.384615	2.46154	0.923077	0.153846	0	5.38462
			SE	2.27273	4.87446	5.08197	3.93648	0.0508197	0	0.0909091	0.194978	0.203279	0.157459	0.207305	167.828	181.249	250.545	143.585	36.6114	37.2615	72.1181	61.5893	117.288	29.5375	85.7583	119.246	43.2446	4.16121	1.81954	1.73729	1.18949	0.301511	0.389957	0.492925	0.121967	0.181818	3.42668	0.0909091	0.211254	0.157459	0.0909091	0.0909091	1.6954	0.325246	0.23355	0.314918	0	0	1.32864
			SE	0	2.60386	1.92308	6.56856	0.0192308	0	0	0.104154	0.0769231	0.262742	0.241217	69.6351	30.9104	90.7709	81.7283	23.3809	20.3537	40.5895	65.4657	105.517	35.8045	123.282	126.508	53.3822	3.16056	2.09536	1.36055	1.1187	0.398468	0.423659	0.478327	0.140442	0	3.02684	0	0.491546	0.286101	0.121626	0	1.72778	0.180401	0.215293	0.264612	0.104154	0	1.34707
Forced - B2		F2		DNS	Omits	Left	Right	Inco	Trials	DNS	Omits	Left	Right	Inco
GB0	20	WT	E0	0	0	50	50	0.5	4	0	0	2	2	0	202	0	38.5	365.5	70.5	68.5	72.5	368.5	619	118	134.75	147	122.5	42	23	4	15	4	6	8	0	0	24	4	2	3	0	0	14	0	2	1	0	0	1
GB1	24	WT	E0	25	0	50	0	0.5	4	1	0	2	0	1	1492.33	0	1661	0	54.5	54.5	0	399.5	399.5	0	52	52	0	20	9	7	4	8	9	1	0	0	2	3	6	0	0	0	0	1	3	1	0	0	2
GF0	20	WT	E0	50	0	0	25	0	4	2	0	0	1	1	2446	0	0	1099	432	0	432	433	0	433	86	0	86	10	2	1	7	7	2	0	0	0	1	2	0	0	0	0	0	0	0	0	0	0	1
GF1	20	WT	E0	0	0	50	50	0.5	4	0	0	2	2	0	734.5	0	405.5	1063.5	412.5	449.5	375.5	98.75	91.5	106	719	945.5	492.5	10	5	2	3	4	5	1	0	0	0	4	1	0	0	0	0	0	2	0	0	0	0
GC0	24	+ve	E0	0	0	50	25	0.5	4	0	0	2	1	1	737.5	0	1091	262	73	56	107	103.333	90	130	825.333	953.5	569	22	9	9	4	6	4	1	0	0	11	4	0	1	0	0	4	0	3	0	0	0	6
GC1	20	WT	E0	0	25	50	25	0.5	4	0	1	2	1	0	954.25	586	1399.5	432	238	316	82	412.667	526.5	185	83.3333	39.5	171	9	6	2	1	4	5	0	0	0	0	4	2	0	0	0	0	0	2	0	0	0	0
GC2	20	+ve	E0	0	0	50	50	0.5	4	0	0	2	2	0	960.5	0	1526.5	394.5	94.5	57.5	131.5	280.75	323.5	238	762.25	954.5	570	9	4	2	3	4	4	1	0	0	0	4	0	0	0	0	0	0	2	0	0	0	0
GC3	20	+ve	E0	0	25	50	0	0.5	4	0	1	2	0	1	251	316	182	0	87.5	87.5	0	94	94	0	1433.5	1433.5	0	21	7	14	0	5	6	1	0	0	9	4	3	0	0	0	0	1	3	1	0	0	9
GE0	20	+ve	E0	0	0	50	50	0.5	4	0	0	2	2	0	377.75	0	364.5	391	82.75	63	102.5	151	130	172	373.75	476.5	271	34	15	15	4	4	4	2	2	1	21	4	0	1	2	1	7	0	2	0	0	0	13
GE1	20	+ve	E0	0	0	50	50	0.5	4	0	0	2	2	0	176.5	0	260	93	147.5	127	168	115.25	89	141.5	683	954	412	19	9	4	6	4	6	3	0	0	6	4	2	1	0	0	2	0	2	2	0	0	0
GE2	20	WT	E0	25	0	25	50	0.25	4	1	0	1	2	0	484.667	0	739	357.5	173	45	237	151	142	155.5	130.667	81	155.5	11	6	3	2	4	4	2	1	0	0	3	1	1	1	0	0	1	1	1	0	0	0
GE3	20	+ve	E0	0	0	50	50	0.5	4	0	0	2	2	0	164	0	135.5	192.5	204.25	177.5	231	44.25	21	67.5	544.5	779.5	309.5	20	13	3	4	4	4	1	0	0	11	4	0	0	0	0	9	0	2	1	0	0	0
GK1	24	WT	E0	25	25	25	25	0.25	4	1	1	1	1	0	2761.67	2857	3062	2366	750.5	286	1215	216.5	149	284	4	4	4	6	3	2	1	3	2	1	0	0	0	3	0	0	0	0	0	0	1	1	0	0	0
GK2	20	WT	E0	0	0	50	50	0.5	4	0	0	2	2	0	702.5	0	715.5	689.5	118	165	71	402	595.5	208.5	11	8	14	23	10	8	5	5	4	5	0	0	9	4	0	3	0	0	3	1	2	2	0	0	3
GK3	20	+ve	E0	0	0	50	50	0.5	4	0	0	2	2	0	528.25	0	493.5	563	278	97	459	179.5	171.5	187.5	683.5	1012	355	20	12	5	3	4	11	0	1	0	4	4	7	0	1	0	0	0	2	0	0	0	3
GK4	20	+ve	E0	0	0	50	0	0.5	4	0	0	2	0	2	321.5	0	614	0	61	61	0	176.5	176.5	0	1266.5	1266.5	0	30	17	13	0	4	8	1	1	0	16	4	4	1	1	0	7	0	4	0	0	0	9
GA0	20	WT	E0	0	0	50	50	0.5	4	0	0	2	2	0	429.5	0	620.5	238.5	269.25	470	68.5	217.25	317.5	117	184.25	196	172.5	32	17	4	11	4	5	3	0	0	20	4	1	2	0	0	10	0	2	0	0	0	2
GA1	20	WT	E0	0	0	50	50	0.5	4	0	0	2	2	0	295	0	270	320	91.25	81.5	101	221	88.5	353.5	742	1155	329	10	4	3	3	4	4	2	0	0	0	4	0	0	0	0	0	0	2	1	0	0	0
GA2	20	+ve	E0	0	0	50	50	0.5	4	0	0	2	2	0	289.5	0	339.5	239.5	108.75	78.5	139	758.25	1144.5	372	35.25	50.5	20	19	4	6	9	5	4	2	1	0	7	4	0	0	0	0	0	0	2	2	1	0	1
GJ1	20	+ve	E0	100	0	0	0	0	4	4	0	0	0	0	0	0	0	0	0	0	0	0	0	0	0	0	0	0	0	0	0	0	0	0	0	0	0	0	0	0	0	0	0	0	0	0	0	0	0
GJ2	24	+ve	E0	0	0	50	50	0.5	4	0	0	2	2	0	1998.25	0	2086	1910.5	344.25	341.5	347	139.75	141.5	138	500.25	570.5	430	18	5	9	4	11	5	2	0	0	0	4	1	0	0	0	0	6	2	1	0	0	0
GJ3	20	WT	E0	0	0	50	25	0.5	4	0	0	2	1	1	228.25	0	241.5	270	93.6667	80	121	292.333	380.5	116	232	278.5	139	23	7	7	9	7	4	1	3	2	6	4	0	0	1	1	1	0	3	1	0	1	2
GG1	20	+ve	E0	50	25	0	25	0	4	2	1	0	1	0	1073	118	0	2028	390	0	390	91	0	91	374	0	374	5	2	0	3	2	1	1	0	0	1	2	0	0	0	0	0	0	0	0	0	0	0
GG2	20	+ve	E0	25	50	25	0	0.25	4	1	2	1	0	0	1058.67	596.5	1983	0	57	57	0	97	97	0	884	884	0	4	3	1	0	3	1	0	0	0	0	3	0	0	0	0	0	0	1	0	0	0	0
WT	11		Mean	11.3636	4.54545	40.9091	36.3636	0.409091	4	0.454545	0.181818	1.63636	1.45455	0.272727	975.515	313	832.091	654.682	245.742	183.273	252.318	292.045	300.864	188.773	216.273	264.227	153.273	17.8182	8.36364	3.90909	5.54545	4.90909	4.54545	2.18182	0.363636	0.181818	5.63636	3.54545	1.18182	0.818182	0.181818	0.0909091	2.54545	0.272727	1.81818	0.727273	0	0.0909091	1
Grb10	13		Mean	13.4615	7.69231	40.3846	30.7692	0.403846	4	0.538462	0.307692	1.61538	1.23077	0.307692	610.494	79.2692	698.115	467.231	148.346	92.5769	159.615	171.583	190.654	118.269	643.526	718.077	254.654	17	7.69231	6.23077	3.07692	4.30769	4.46154	1.15385	0.384615	0.0769231	6.61538	3.46154	1.30769	0.307692	0.307692	0.0769231	2.23077	0.538462	1.92308	0.538462	0.0769231	0	3.15385
			SE	5.18262	3.04918	5.08197	5.18262	0.0508197	0	0.207305	0.121967	0.203279	0.207305	0.140836	268.188	259.863	273.321	199.493	64.2283	50.908	104.719	35.356	66.2661	37.5746	79.3838	120.925	44.4657	3.42668	1.91773	0.719274	1.35756	0.494599	0.577827	0.723856	0.278722	0.181818	2.60863	0.207305	0.536287	0.377026	0.121967	0.0909091	1.46078	0.140836	0.26348	0.194978	0	0.0909091	0.330289
			SE	8.30864	4.37121	5.32476	6.42626	0.0532476	0	0.332346	0.174848	0.21299	0.25705	0.174848	152.257	49.8655	203.435	191.519	33.2859	24.4753	43.2747	52.4515	82.9809	30.6691	115.475	130.442	61.8002	2.76424	1.47363	1.47263	0.73782	0.692308	0.821314	0.249259	0.180401	0.0769231	1.88291	0.332346	0.603246	0.133235	0.174848	0.0769231	0.927872	0.461538	0.309291	0.215293	0.0769231	0	1.26007
Forced - B3		F3		DNS	Omits	Left	Right	Inco	Trials	DNS	Omits	Left	Right	Inco
GB0	20	WT	E0	50	0	0	50	0	4	2	0	0	2	0	459	0	0	459	78.5	0	78.5	114.5	0	114.5	190	0	190	19	9	6	4	3	2	5	1	0	8	2	0	3	1	0	3	1	0	0	0	0	5
GB1	24	WT	E0	50	25	25	0	0.25	4	2	1	1	0	0	2582	1394	3770	0	1504	1504	0	574	574	0	473	473	0	13	2	7	4	3	1	1	0	0	8	2	0	0	0	0	0	1	1	1	0	0	4
GF0	20	WT	E0	100	0	0	0	0	4	4	0	0	0	0	0	0	0	0	0	0	0	0	0	0	0	0	0	0	0	0	0	0	0	0	0	0	0	0	0	0	0	0	0	0	0	0	0	0	0
GF1	20	WT	E0	75	25	0	0	0	4	3	1	0	0	0	1107	1107	0	0	0	0	0	0	0	0	0	0	0	3	1	1	1	2	0	0	0	0	1	1	0	0	0	0	0	0	0	0	0	0	1
GC0	24	+ve	E0	25	0	50	0	0.5	4	1	0	2	0	1	1967	0	2804.5	0	404.5	404.5	0	89.5	89.5	0	951.5	951.5	0	21	7	8	6	10	3	1	0	0	7	3	0	0	0	0	4	3	3	1	0	0	1
GC1	20	WT	E0	100	0	0	0	0	4	4	0	0	0	0	0	0	0	0	0	0	0	0	0	0	0	0	0	2	0	1	1	1	0	0	0	0	1	0	0	0	0	0	0	0	0	0	0	0	1
GC2	20	+ve	E0	75	0	25	0	0.25	4	3	0	1	0	0	38	0	38	0	107	107	0	984	984	0	223	223	0	2	1	1	0	1	1	0	0	0	0	1	0	0	0	0	0	0	1	0	0	0	0
GC3	20	+ve	E0	0	0	50	0	0.5	4	0	0	2	0	2	627.25	0	754	0	51.5	51.5	0	86	86	0	1424	1424	0	11	5	6	0	4	5	1	0	0	1	4	1	0	0	0	0	0	4	1	0	0	1
GE0	20	+ve	E0	25	0	25	50	0.25	4	1	0	1	2	0	417.667	0	605	324	211.667	63	286	111	85	124	209.333	295	166.5	8	4	1	3	4	3	0	0	0	1	3	0	0	0	0	1	0	1	0	0	0	0
GE1	20	+ve	E0	25	25	50	0	0.5	4	1	1	2	0	0	719	1663	247	0	218	218	0	120	120	0	750.5	750.5	0	9	5	3	1	3	3	1	0	0	2	3	1	0	0	0	1	0	2	1	0	0	0
GE2	20	WT	E0	50	0	25	25	0.25	4	2	0	1	1	0	3222	0	3314	3130	157.5	74	241	8547.5	9791	7304	140	7	273	6	4	1	1	2	4	0	0	0	0	2	2	0	0	0	0	0	1	0	0	0	0
GE3	20	+ve	E0	0	0	50	50	0.5	4	0	0	2	2	0	146.75	0	218.5	75	261	171.5	350.5	19.75	22	17.5	594	841	347	18	9	2	7	4	5	0	0	0	9	4	1	0	0	0	4	0	2	0	0	0	0
GK1	24	WT	E0	75	0	0	25	0	4	3	0	0	1	0	2708	0	0	2708	1369	0	1369	2265	0	2265	13558	0	13558	4	3	0	1	1	3	0	0	0	0	1	2	0	0	0	0	0	0	0	0	0	0
GK2	20	WT	E0	0	0	50	50	0.5	4	0	0	2	2	0	656.75	0	603.5	710	247.5	402.5	92.5	403.5	685	122	20.25	28	12.5	13	6	4	3	4	5	2	0	0	2	4	1	0	0	0	1	0	2	1	0	0	1
GK3	20	+ve	E0	50	25	0	0	0	4	2	1	0	0	1	1159.5	937	0	0	0	0	0	0	0	0	0	0	0	5	2	0	3	3	1	0	0	0	1	2	0	0	0	0	0	0	0	0	0	0	0
GK4	20	+ve	E0	0	0	50	0	0.5	4	0	0	2	0	2	936	0	1358.5	0	97.5	97.5	0	166.5	166.5	0	1035.5	1035.5	0	59	38	21	0	6	19	4	3	0	27	4	15	3	1	0	15	2	4	1	2	0	12
GA0	20	WT	E0	0	0	50	50	0.5	4	0	0	2	2	0	2524.25	0	2076.5	2972	242	98.5	385.5	162.5	187	138	212	171	253	11	5	2	4	4	5	2	0	0	0	4	1	0	0	0	0	0	2	0	0	0	0
GA1	20	WT	E0	0	0	50	50	0.5	4	0	0	2	2	0	242	0	272.5	211.5	259.5	307.5	211.5	118.25	112	124.5	746.5	1134.5	358.5	10	5	3	2	5	4	0	0	0	1	4	0	0	0	0	1	1	2	0	0	0	0
GA2	20	+ve	E0	0	0	50	50	0.5	4	0	0	2	2	0	597.25	0	375	819.5	110.25	125.5	95	4347.5	6689.5	2005.5	21.5	29.5	13.5	19	7	2	10	5	5	0	0	8	1	4	1	0	0	2	0	0	2	0	0	0	0
GJ1	20	+ve	E0	100	0	0	0	0	4	4	0	0	0	0	0	0	0	0	0	0	0	0	0	0	0	0	0	3	2	0	1	1	0	0	0	0	2	0	0	0	0	0	2	0	0	0	0	0	0
GJ2	24	+ve	E0	75	0	0	25	0	4	3	0	0	1	0	1980	0	0	1980	1223	0	1223	480	0	480	385	0	385	6	1	4	1	4	1	0	0	0	1	1	0	0	0	0	0	3	0	0	0	0	1
GJ3	20	WT	E0	0	0	50	50	0.5	4	0	0	2	2	0	662	0	732	592	590	874	306	96.5	63	130	146.5	140.5	152.5	10	6	2	2	4	4	1	0	0	1	4	0	1	0	0	1	0	2	0	0	0	0
GG1	20	+ve	E0	75	0	0	25	0	4	3	0	0	1	0	1529	0	0	1529	435	0	435	252	0	252	363	0	363	2	1	0	1	1	1	0	0	0	0	1	0	0	0	0	0	0	0	0	0	0	0
GG2	20	+ve	E0	100	0	0	0	0	4	4	0	0	0	0	0	0	0	0	0	0	0	0	0	0	0	0	0	0	0	0	0	0	0	0	0	0	0	0	0	0	0	0	0	0	0	0	0	0	0
WT	11		Mean	45.4545	4.54545	22.7273	27.2727	0.227273	4	1.81818	0.181818	0.909091	1.09091	0	1287.55	227.364	978.955	980.227	404.364	296.409	244	1116.52	1037.45	927.091	1407.84	177.636	1345.23	8.27273	3.72727	2.45455	2.09091	2.63636	2.54545	1	0.0909091	0	2	2.18182	0.545455	0.363636	0.0909091	0	0.545455	0.272727	0.909091	0.181818	0	0	1.09091
Grb10	13		Mean	42.3077	3.84615	26.9231	15.3846	0.269231	4	1.69231	0.153846	1.07692	0.615385	0.461538	778.263	200	492.346	363.654	239.955	95.2692	183.808	512.019	634.038	221.462	458.256	426.923	98.0769	12.5385	6.30769	3.69231	2.53846	3.53846	3.61538	0.538462	0.230769	0.615385	4	2.30769	1.46154	0.230769	0.0769231	0.153846	2.07692	0.615385	1.46154	0.307692	0.153846	0	1.15385
			SE	12.069	3.04918	7.11476	7.11476	0.0711476	0	0.482761	0.121967	0.28459	0.28459	0	367.817	153.743	425.759	387.341	162.475	145.577	119.812	768.897	878.4	668.129	1217	105.034	1221.92	1.73777	0.853771	0.705351	0.435985	0.472377	0.60848	0.467099	0.0909091	0	0.914529	0.482761	0.247299	0.278722	0.0909091	0	0.281672	0.140836	0.28459	0.121967	0	0	0.530087
			SE	10.736	2.60386	6.61531	6.03041	0.0661531	0	0.429439	0.104154	0.264612	0.241217	0.215293	195.107	141.502	222.815	184.69	91.1558	32.61	96.7225	328.409	509.882	153.882	128.24	139.691	44.0905	4.31695	2.75352	1.59882	0.888786	0.730432	1.37998	0.312463	0.230769	0.615385	2.06311	0.429439	1.13576	0.230769	0.0769231	0.153846	1.15171	0.330859	0.417799	0.133235	0.153846	0	0.91179
Choice Total		CT		DNS	Omits	Left	Right	All Bias
GB0	20	WT	E0	16.6667	0	58.3333	25	0.583333	24	4	0	14	6	0.7	727.45	0	703.929	782.333	101.35	99.0714	106.667	548.3	278.857	1177	163.35	164.714	160.167	116	59	28	29	20	30	31	2	6	27	20	10	16	1	2	10	0	14	7	1	0	6
GB1	24	WT	E0	70.8333	8.33333	16.6667	4.16667	0.166667	24	17	2	4	1	0.8	2105	2734.5	1832.75	1935	107.2	89.75	177	474.2	470.25	490	108.2	125	41	26	8	13	5	13	5	4	0	0	4	7	0	0	0	0	1	4	4	3	0	0	2
GF0	20	WT	E0	66.6667	4.16667	16.6667	12.5	0.166667	24	16	1	4	3	0.571429	1699.62	3528	1431	1448.33	276.429	245.25	318	588	735.75	391	165.286	178.25	148	28	11	10	7	11	10	4	0	0	3	8	3	0	0	0	0	1	4	3	0	0	2
GF1	20	WT	E0	41.6667	0	50	8.33333	0.5	24	10	0	12	2	0.857143	633.5	0	717.417	130	307.571	347	71	109.5	110.417	104	874	952.167	405	65	30	21	14	18	16	8	0	0	23	14	2	5	0	0	9	1	12	3	0	0	5
GC0	24	+ve	E0	16.6667	8.33333	70.8333	4.16667	0.708333	24	4	2	17	1	0.944444	573.8	363.5	553.059	1347	118.556	91.5882	577	113.944	108.353	209	1079.22	1107.47	599	118	50	36	32	37	21	2	1	0	57	20	3	1	0	0	26	3	17	1	1	0	14
GC1	20	WT	E0	45.8333	12.5	12.5	29.1667	0.125	24	11	3	3	7	0.3	1410.85	3150.67	939.667	867.143	275.5	740.667	76.1429	912.1	2734	131.286	138.1	37.3333	181.286	34	16	8	10	17	12	0	1	0	4	13	2	0	1	0	0	3	3	0	0	0	2
GC2	20	+ve	E0	12.5	0	45.8333	41.6667	0.458333	24	3	0	11	10	0.52381	971.762	0	1077.18	855.8	284.238	125.455	458.9	1017.19	1716.18	248.3	355.714	358.545	352.6	61	27	18	16	24	24	5	0	2	6	21	3	0	0	0	3	2	11	2	0	0	3
GC3	20	+ve	E0	0	0	100	0	1	24	0	0	24	0	1	550.292	0	550.292	0	83.0833	83.0833	0	84.375	84.375	0	1407.96	1407.96	0	110	41	69	0	28	33	14	1	0	34	24	9	0	0	0	8	4	24	14	1	0	26
GE0	20	+ve	E0	4.16667	0	45.8333	50	0.458333	24	1	0	11	12	0.478261	1096.3	0	1159.55	1038.33	158.87	219.909	102.917	173.043	197.818	150.333	284.87	319.545	253.083	146	62	53	31	23	30	19	5	0	69	23	7	8	1	0	23	0	11	9	3	0	30
GE1	20	+ve	E0	8.33333	4.16667	66.6667	20.8333	0.666667	24	2	1	16	5	0.761905	684.364	1072	542.875	1059.6	242	182.875	431.2	153.238	153.375	152.8	800	908.062	454.2	91	45	33	13	23	25	11	1	0	31	22	4	4	0	0	15	0	16	4	1	0	12
GE2	20	WT	E0	33.3333	8.33333	45.8333	12.5	0.458333	24	8	2	11	3	0.785714	929.688	2357.5	661.818	960	151.714	134.727	214	1264.57	1537.45	264	164.643	149.364	220.667	80	33	30	17	21	17	8	1	0	33	16	3	0	1	0	13	2	11	6	0	0	11
GE3	20	+ve	E0	0	0	54.1667	45.8333	0.541667	24	0	0	13	11	0.541667	237.333	0	142.846	349	180.125	186.385	172.727	191.667	181.385	203.818	477.458	671.154	248.545	105	49	25	31	27	27	6	0	0	45	24	3	3	0	0	19	1	13	1	0	0	10
GK1	24	WT	E0	45.8333	0	54.1667	0	0.541667	24	11	0	13	0	1	1455.69	0	1455.69	0	399.385	399.385	0	5228.23	5228.23	0	93	93	0	37	18	15	4	18	17	1	0	0	1	13	4	0	0	0	1	1	13	1	0	0	0
GK2	20	WT	E0	0	0	37.5	62.5	0.375	24	0	0	9	15	0.375	353.167	0	329.667	367.267	93.625	74.3333	105.2	371.458	698.444	175.267	23.6667	24.4444	23.2	114	52	27	35	28	25	11	2	0	48	24	1	7	1	0	19	3	9	2	0	0	13
GK3	20	+ve	E0	16.6667	12.5	50	20.8333	0.5	24	4	3	12	5	0.705882	1061	989	1132	933.8	386.706	476.917	170.2	197.882	215.75	155	702.529	843	365.4	73	26	34	13	31	19	6	0	0	17	20	2	2	0	0	2	6	12	4	0	0	12
GK4	20	+ve	E0	8.33333	0	91.6667	0	0.916667	24	2	0	22	0	1	199.045	0	199.045	0	166.273	166.273	0	162.227	162.227	0	1029.82	1029.82	0	298	146	152	0	30	40	30	20	0	178	22	18	14	11	0	81	8	22	16	9	0	97
GA0	20	WT	E0	0	0	58.3333	41.6667	0.583333	24	0	0	14	10	0.583333	765.083	0	971.5	476.1	242.667	269.571	205	176.792	186.071	163.8	192.292	160.143	237.3	129	55	37	37	25	34	12	5	9	44	24	10	1	0	2	18	1	14	7	3	1	11
GA1	20	WT	E0	4.16667	0	29.1667	66.6667	0.291667	24	1	0	7	16	0.304348	548.13	0	741.857	463.375	290.304	378.857	251.562	111.348	115.286	109.625	600.13	1210.71	333	93	50	17	26	23	31	10	3	0	26	23	8	4	3	0	12	0	7	1	0	0	9
GA2	20	+ve	E0	4.16667	0	79.1667	16.6667	0.791667	24	1	0	19	4	0.826087	334	0	305.368	470	151.739	148.632	166.5	1869.39	1930.05	1581.25	44.2174	44.6842	42	121	51	32	38	25	26	13	2	1	54	23	3	5	1	0	19	0	19	8	1	0	4
GJ1	20	+ve	E0	41.6667	20.8333	16.6667	20.8333	0.166667	24	10	5	4	5	0.444444	1074.21	1118.6	348.5	1610.4	376.222	155.75	552.6	115.778	108.75	121.4	525.111	681.75	399.8	39	19	12	8	18	9	1	0	0	11	14	0	1	0	0	4	3	4	0	0	0	5
GJ2	24	+ve	E0	45.8333	4.16667	33.3333	16.6667	0.333333	24	11	1	8	4	0.666667	1258.77	3780	976.75	1192.5	289.667	281.125	306.75	134.167	127.75	147	928.5	1180	425.5	52	23	20	9	20	20	5	1	0	6	13	8	0	0	0	2	6	8	3	1	0	2
GJ3	20	WT	E0	0	0	62.5	37.5	0.625	24	0	0	15	9	0.625	559.833	0	624.133	452.667	144.292	121.467	182.333	205.583	248.267	134.444	173.208	179.6	162.556	90	34	26	30	36	25	3	3	2	21	24	1	1	0	0	8	1	15	0	1	2	7
GG1	20	+ve	E0	29.1667	8.33333	33.3333	29.1667	0.333333	24	7	2	8	7	0.533333	1792.76	1810	1950.62	1607.43	555.467	451.375	674.429	152.8	144.75	162	584.4	803.125	334.429	71	27	19	25	33	18	6	0	1	13	17	3	3	0	0	4	8	8	2	0	0	1
GG2	20	+ve	E0	54.1667	8.33333	37.5	0	0.375	24	13	2	9	0	1	1269.27	2983	888.444	0	167	167	0	166.667	166.667	0	913.556	913.556	0	46	25	21	0	17	16	0	0	0	13	11	7	0	0	0	7	6	9	0	0	0	6
WT	11		Mean	29.5455	3.0303	40.1515	27.2727	0.401515	24	7.09091	0.727273	9.63636	6.54545	0.627452	1017.09	1070.06	946.312	716.565	217.276	263.644	155.173	908.189	1122.09	285.493	245.08	297.703	173.834	73.8182	33.2727	21.0909	19.4545	20.9091	20.1818	8.36364	1.54545	1.54545	21.2727	16.9091	4	3.09091	0.636364	0.363636	8.27273	1.54545	9.63636	3	0.454545	0.272727	6.18182
Grb10	13		Mean	18.5897	5.12821	55.7692	20.5128	0.557692	24	4.46154	1.23077	13.3846	4.92308	0.725115	854.071	932.008	755.887	804.912	243.073	210.49	277.94	348.644	407.495	240.839	702.566	789.898	267.274	102.385	45.4615	40.3077	16.6154	25.8462	23.6923	9.07692	2.38462	0.307692	41.0769	19.5385	5.38462	3.15385	1	0	16.3846	3.61538	13.3846	4.92308	1.30769	0	17.0769
			SE	8.09224	1.38659	5.62599	6.86641	0.0562599	0	1.94214	0.332782	1.35024	1.64794	0.069549	169.727	455.406	134.799	172.612	30.8448	60.043	27.834	445.173	474.559	98.4947	76.9536	119.199	37.7291	11.4858	5.59398	2.78455	3.72061	2.11684	2.84387	2.57001	0.492925	0.927985	5.0165	1.94214	1.09545	1.48602	0.278722	0.243935	2.11527	0.389957	1.35024	0.786245	0.281672	0.194978	1.32677
			SE	5.07282	1.77492	6.81294	4.79878	0.0681294	0	1.21748	0.425981	1.63511	1.15171	0.0588782	130.597	346.051	140.626	162.89	36.864	34.3157	65.8585	143.388	174.97	113.954	103.649	104.798	55.1576	18.6481	9.18096	10.2572	3.72541	1.64022	2.20833	2.31899	1.51716	0.174848	12.8195	1.21748	1.27871	1.12002	0.839719	0	5.87535	0.820713	1.63511	1.46086	0.682986	0	7.10224
Forced Total		FT		DNS	Omits	Left	Right	Inco	Trials	DNS	Omits	Left	Right	Inco
GB0	20	WT	E0	16.6667	0	33.3333	50	0.333333	12	2	0	4	6	0	316	0	139.25	433.833	94.5	100	90.8333	323.5	577.75	154	146.1	136.75	152.333	98	49	24	25	11	13	19	1	0	54	10	3	7	1	0	28	1	4	4	0	0	15
GB1	24	WT	E0	33.3333	25	25	8.33333	0.25	12	4	3	3	1	1	1798.38	1714.33	2364	997	417.75	537.667	58	440	457.667	387	163.25	192.333	76	41	14	17	10	17	11	3	0	0	10	8	6	0	0	0	0	5	4	2	0	0	6
GF0	20	WT	E0	50	8.33333	8.33333	16.6667	0.0833333	12	6	1	1	2	2	1945.83	892	2902	1300.5	390.667	199	486.5	579.333	1113	312.5	109.333	81	123.5	28	10	5	13	13	7	1	0	0	7	6	2	0	0	0	2	0	2	0	0	0	3
GF1	20	WT	E0	25	8.33333	33.3333	25	0.333333	12	3	1	4	3	1	518.222	1107	299.25	749.667	285.857	261	319	102.571	89.75	119.667	800.857	1046.75	473	40	18	12	10	12	10	3	0	0	15	9	2	1	0	0	6	2	5	0	0	0	5
GC0	24	+ve	E0	8.33333	0	50	8.33333	0.5	12	1	0	6	1	4	1102.64	0	1482.83	262	163.714	173.167	107	129.571	129.5	130	964.714	1030.67	569	66	24	26	16	25	11	2	1	0	27	11	0	1	0	0	12	4	10	1	1	0	10
GC1	20	WT	E0	33.3333	8.33333	33.3333	25	0.333333	12	4	1	4	3	0	855.125	586	805.75	1010.67	215.429	290.5	115.333	260.571	336	160	83.2857	47.25	131.333	21	11	6	4	9	9	2	0	0	1	8	2	1	0	0	0	0	4	1	0	0	1
GC2	20	+ve	E0	25	0	41.6667	33.3333	0.416667	12	3	0	5	4	0	536.444	0	678.6	358.75	78.1111	61.6	98.75	502	703.8	249.75	492.111	557.2	410.75	44	25	14	5	9	10	3	1	0	21	9	1	0	1	0	14	0	5	2	0	0	7
GC3	20	+ve	E0	0	8.33333	50	0	0.5	12	0	1	6	0	5	460.583	316	476	0	62.6667	62.6667	0	87.8333	87.8333	0	1521	1521	0	59	22	37	0	13	18	4	0	0	24	12	7	0	0	0	3	1	11	4	0	0	21
GE0	20	+ve	E0	8.33333	0	41.6667	50	0.416667	12	1	0	5	6	0	419.727	0	300.8	518.833	122.727	94.8	146	153.364	138.8	165.5	310.818	402.8	234.167	87	38	28	21	12	13	5	3	1	53	11	2	3	2	1	19	0	5	0	1	0	22
GE1	20	+ve	E0	8.33333	8.33333	50	33.3333	0.5	12	1	1	6	4	0	337	1663	188	229	125.6	128.5	121.25	109.4	101.167	121.75	756.8	951.667	464.5	71	39	19	13	11	13	9	0	0	38	11	3	4	0	0	21	0	6	5	0	0	8
GE2	20	WT	E0	25	0	33.3333	33.3333	0.333333	12	3	0	4	4	1	967.889	0	1028.5	1138.75	161.125	132.25	190	2390.12	2796.5	1983.75	159.875	144	175.75	66	29	21	16	12	14	5	2	2	31	9	5	1	2	1	11	3	5	3	0	0	10
GE3	20	+ve	E0	0	0	50	50	0.5	12	0	0	6	6	0	175.833	0	226	125.667	186.5	147.333	225.667	54.1667	52.8333	55.5	606.917	854	359.833	71	43	9	19	12	13	5	1	0	40	12	1	2	1	0	27	0	6	1	0	0	2
GK1	24	WT	E0	33.3333	8.33333	25	33.3333	0.25	12	4	1	3	4	0	1782.12	2857	1490	1732.5	651.857	133.333	1040.75	730.143	617	815	2003.14	68.3333	3454.25	38	16	10	12	10	10	3	0	0	15	8	3	0	0	0	5	1	3	2	0	0	4
GK2	20	WT	E0	0	0	50	50	0.5	12	0	0	6	6	0	726	0	638.833	813.167	148.833	222.5	75.1667	447.583	741.833	153.333	16.0833	15.5	16.6667	53	24	16	13	13	14	8	0	0	18	12	2	3	0	0	7	1	6	3	0	0	6
GK3	20	+ve	E0	16.6667	8.33333	25	25	0.25	12	2	1	3	3	3	573.5	937	547.667	483.667	267.333	88.6667	446	160	133.667	186.333	676	1016.33	335.667	46	25	12	9	11	17	1	1	0	16	10	8	1	1	0	5	0	4	0	0	0	8
GK4	20	+ve	E0	0	8.33333	50	0	0.5	12	0	1	6	0	5	522.167	174	752.167	0	68.6667	68.6667	0	147.5	147.5	0	1057.83	1057.83	0	138	84	54	0	14	36	5	4	0	79	12	25	4	2	0	41	2	11	1	2	0	38
GA0	20	WT	E0	0	0	50	50	0.5	12	0	0	6	6	0	1116.33	0	1060.83	1171.83	207.75	221.333	194.167	188.333	247.5	129.167	209.333	188.5	230.167	77	38	10	29	12	15	9	1	0	40	12	3	3	0	0	20	0	6	1	0	0	3
GA1	20	WT	E0	0	0	50	50	0.5	12	0	0	6	6	0	211.5	0	214.167	208.833	149.167	170.667	127.667	151.75	106.333	197.167	730.75	1093.17	368.333	66	31	24	11	14	12	6	0	0	34	12	0	0	0	0	19	2	6	3	0	0	13
GA2	20	+ve	E0	0	0	50	50	0.5	12	0	0	6	6	0	337.667	0	252.5	422.833	103.75	103.833	103.667	1988.17	3034.5	941.833	29.25	34.3333	24.1667	67	28	13	26	14	13	2	2	8	28	12	1	0	1	2	12	0	6	2	1	0	4
GJ1	20	+ve	E0	66.6667	0	16.6667	16.6667	0.166667	12	8	0	2	2	0	269.75	0	352.5	187	304.25	264.5	344	128.5	100.5	156.5	429.5	577.5	281.5	25	11	6	8	6	4	4	0	0	11	4	0	0	0	0	7	1	2	1	0	0	2
GJ2	24	+ve	E0	25	0	33.3333	41.6667	0.333333	12	3	0	4	5	0	1507.56	0	1502.75	1511.4	365.778	283.5	431.6	174.111	124.25	214	657	926	441.8	36	11	18	7	19	10	4	0	0	3	9	1	0	0	0	1	9	4	3	0	0	2
GJ3	20	WT	E0	0	0	41.6667	33.3333	0.416667	12	0	0	5	4	3	376.417	0	398	457.5	353.333	471.8	205.25	194	223.4	157.25	183.333	240	112.5	51	22	13	16	15	13	3	3	2	15	12	1	2	1	1	5	0	7	1	0	1	4
GG1	20	+ve	E0	41.6667	8.33333	16.6667	33.3333	0.166667	12	5	1	2	4	0	664	118	160	1052.5	262.667	39	374.5	115.333	83.5	131.25	488	789.5	337.25	23	9	6	8	9	6	5	0	0	3	7	0	1	0	0	1	2	2	2	0	0	0
GG2	20	+ve	E0	41.6667	25	25	0	0.25	12	5	3	3	0	1	855.714	523.333	1366.33	0	57	57	0	124.667	124.667	0	1063.67	1063.67	0	25	17	8	0	8	6	1	0	0	10	7	2	0	0	0	8	1	4	1	0	0	2
WT	11		Mean	19.697	5.30303	34.8485	34.0909	0.348485	12	2.36364	0.636364	4.18182	4.09091	0.727273	964.893	650.576	1030.96	910.386	279.661	249.095	263.879	527.992	664.248	415.348	418.668	295.78	483.076	52.6364	23.8182	14.3636	14.4545	12.5455	11.6364	5.63636	0.636364	0.363636	21.8182	9.63636	2.63636	1.63636	0.363636	0.181818	9.36364	1.36364	4.72727	1.81818	0	0.0909091	6.36364
Grb10	13		Mean	18.5897	5.12821	38.4615	26.2821	0.384615	12	2.23077	0.615385	4.61538	3.15385	1.38462	597.121	287.026	637.396	396.281	166.828	121.018	184.495	298.047	381.732	180.955	696.432	829.423	266.049	58.3077	28.9231	19.2308	10.1538	12.5385	13.0769	3.84615	1	0.692308	27.1538	9.76923	3.92308	1.23077	0.615385	0.230769	13.1538	1.53846	5.84615	1.76923	0.384615	0	9.69231
			SE	5.30303	2.32268	3.86289	4.41739	0.0386289	0	0.636364	0.278722	0.463547	0.530087	0.30424	189.529	283.006	271.23	132.315	49.2825	42.0117	86.2578	195.123	232.054	168.326	176.583	117.226	299.735	6.82811	3.64771	2.00578	2.12929	0.679085	0.741898	1.53311	0.309625	0.243935	4.81063	0.636364	0.509415	0.636364	0.203279	0.121967	2.76429	0.472377	0.449058	0.400413	0	0.0909091	1.3367
			SE	5.7514	2.01014	3.71942	5.40771	0.0371942	0	0.690168	0.241217	0.446331	0.648926	0.572203	102.388	138.455	138.343	122.292	28.4414	21.6301	45.3033	144.025	225.798	67.3763	106.857	102.5	55.1111	8.75257	5.48946	3.87985	2.32833	1.37568	2.22302	0.597496	0.358057	0.61378	5.95587	0.690168	1.89284	0.425981	0.21299	0.166173	3.19825	0.703611	0.846154	0.410657	0.180401	0	3.05586
[truncated: 103 more columns]

## Sheet: E0-Last
Grb10 - DelRei									First E2 session				Delays are : Adjusted=1s, non-adjusted=1s in all blocks									FE0F										The following data are responses/zone (as in parts of each trial):								Z0:Initiation Stimulus on, Z1: Choice stimuli on, Z2: in delay to reward, Z3:Reward delivery, Z4: In ITI
																	All latencines are in s				All latencines are in s				All latencines are in s
				% Responses				All		Responses				% (AD/NA)	Latency to Initiate (CP)				Latency to respond (NP)			Latency to collect			Duration of first eat (PP)			Number of NPs				All NPs						Centre NPs only						Adjusted NPs only
Subject	Session	Gtype	Task	DNS	Omits	AD	NA	Bias	Trials	DNS	Omits	AD	NA	Bias	All	Omits	AD	NA	All	AD	NA	All	AD	NA	All	AD	NA	All	Centre	AD	NA	0	1	2	3	4	5	0	1	2	3	4	5	0	1	2	3	4	5
Choice - B1		C1
GB0	29	WT	E0	0	0	100	0	1	8	0	0	8	0	1	389.375	0	389.375	0	84.625	84.625	0	1612.62	1612.62	0	113	113	0	83	28	43	12	23	10	6	0	16	28	8	2	0	0	4	14	14	8	6	0	6	9
GB1	36	WT	E0	12.5	0	75	12.5	0.75	8	1	0	6	1	0.857143	1809.57	0	1839.83	1628	381	423.667	125	75.2857	68	119	1062.71	1169.17	424	20	9	10	1	10	9	1	0	0	0	7	2	0	0	0	0	3	6	1	0	0	0
GF0	34	WT	E0	12.5	0	50	37.5	0.5	8	1	0	4	3	0.571429	785	0	691.25	910	532.143	838.5	123.667	479.714	664.75	233	146.714	110.75	194.667	24	12	9	3	8	12	1	0	0	3	7	5	0	0	0	0	1	4	1	0	0	3
GF1	34	WT	E0	0	0	100	0	1	8	0	0	8	0	1	531.625	0	531.625	0	285.875	285.875	0	77.75	77.75	0	1318.25	1318.25	0	31	14	15	2	10	9	2	0	0	10	8	1	0	0	0	5	2	8	2	0	0	3
GC0	36	+ve	E0	0	0	87.5	12.5	0.875	8	0	0	7	1	0.875	618.25	0	662	312	273.625	124.143	1320	90.25	84.4286	131	1147.25	1183	897	50	18	13	19	21	9	3	0	0	17	8	1	1	0	0	8	4	7	0	0	0	2
GC1	35	WT	E0	0	0	62.5	37.5	0.625	8	0	0	5	3	0.625	348.625	0	454.4	172.333	248.375	185.4	353.333	136	153	107.667	323.375	306.4	351.667	31	15	13	3	8	14	2	0	0	7	8	6	0	0	0	1	0	5	2	0	0	6
GC2	34	+ve	E0	0	0	100	0	1	8	0	0	8	0	1	312.25	0	312.25	0	58.25	58.25	0	75.625	75.625	0	1050.88	1050.88	0	34	18	14	2	8	11	1	0	0	14	8	3	0	0	0	7	0	8	1	0	0	5
GC3	29	+ve	E0	12.5	0	87.5	0	0.875	8	1	0	7	0	1	134.143	0	134.143	0	41.8571	41.8571	0	74.4286	74.4286	0	1126.43	1126.43	0	31	8	23	0	7	7	11	1	0	5	7	0	0	0	0	1	0	7	11	1	0	4
GE0	29	+ve	E0	0	0	100	0	1	8	0	0	8	0	1	493.625	0	493.625	0	100.625	100.625	0	59	59	0	537.375	537.375	0	44	14	27	3	17	10	3	0	0	14	8	2	0	0	0	4	9	8	3	0	0	7
GE1	29	+ve	E0	0	0	100	0	1	8	0	0	8	0	1	97.375	0	97.375	0	79	79	0	204.375	204.375	0	560.125	560.125	0	26	9	13	4	8	8	0	0	0	10	8	0	0	0	0	1	0	8	0	0	0	5
GE2	34	WT	E0	0	0	75	25	0.75	8	0	0	6	2	0.75	773.125	0	857.333	520.5	189.25	196.667	167	1123.88	1405.17	280	42.875	51.5	17	32	13	15	4	19	11	2	0	0	0	8	3	2	0	0	0	9	6	0	0	0	0
GE3	29	+ve	E0	0	0	100	0	1	8	0	0	8	0	1	155.625	0	155.625	0	76.375	76.375	0	714.625	714.625	0	511.5	511.5	0	29	9	20	0	17	9	0	0	3	0	8	1	0	0	0	0	9	8	0	0	3	0
GK1	37	WT	E0	0	0	75	25	0.75	8	0	0	6	2	0.75	437.25	0	490.167	278.5	345.625	330.667	390.5	90.25	87.3333	99	844.375	945.833	540	37	17	10	10	10	13	3	0	0	11	8	5	0	0	0	4	0	6	3	0	0	1
GK2	27	WT	E0	0	0	87.5	12.5	0.875	8	0	0	7	1	0.875	236.125	0	262.857	49	111	108.857	126	283.375	292.857	217	24.75	23.4286	34	58	23	23	12	9	14	5	1	14	15	8	6	0	0	4	5	0	7	5	1	5	5
GK3	35	+ve	E0	0	0	87.5	12.5	0.875	8	0	0	7	1	0.875	88.875	0	86.8571	103	55.375	57.1429	43	72.5	62	146	869.125	949.286	308	49	19	22	8	13	9	0	0	0	27	8	1	0	0	0	10	1	7	0	0	0	14
GK4	29	+ve	E0	0	0	100	0	1	8	0	0	8	0	1	72.375	0	72.375	0	193.75	193.75	0	135	135	0	904.125	904.125	0	166	72	94	0	9	33	24	3	0	97	8	25	2	0	0	37	1	8	22	3	0	60
GA0	34	WT	E0	0	0	100	0	1	8	0	0	8	0	1	520.875	0	520.875	0	153	153	0	68.125	68.125	0	436.875	436.875	0	51	16	31	4	15	9	0	0	3	24	8	1	0	0	2	5	7	8	0	0	1	15
GA1	29	WT	E0	0	0	100	0	1	8	0	0	8	0	1	201.25	0	201.25	0	79.125	79.125	0	50.625	50.625	0	724.5	724.5	0	33	15	13	5	13	11	1	0	0	8	8	3	0	0	0	4	3	8	1	0	0	1
GA2	29	+ve	E0	0	0	87.5	12.5	0.875	8	0	0	7	1	0.875	312	0	282	522	128.5	114.286	228	1551.38	1400.86	2605	36.375	33.4286	57	39	17	20	2	9	13	0	0	4	13	8	5	0	0	0	4	1	7	0	0	3	9
GJ1	37	+ve	E0	12.5	0	62.5	25	0.625	8	1	0	5	2	0.714286	860.857	0	858.2	867.5	524.714	553.2	453.5	65.8571	74.4	44.5	791.429	929.6	446	19	10	7	2	9	10	0	0	0	0	7	3	0	0	0	0	2	5	0	0	0	0
GJ2	34	+ve	E0	0	0	100	0	1	8	0	0	8	0	1	1651.25	0	1651.25	0	116.625	116.625	0	117.75	117.75	0	1038.12	1038.12	0	63	12	50	1	42	9	3	0	0	9	8	1	0	0	0	3	33	8	3	0	0	6
GJ3	34	WT	E0	0	0	87.5	12.5	0.875	8	0	0	7	1	0.875	250	0	229.571	393	117.5	123.143	78	101.625	101.429	103	282.25	307.143	108	39	14	22	3	14	9	2	0	0	14	8	1	1	0	0	4	6	7	1	0	0	8
GG1	34	+ve	E0	12.5	0	50	37.5	0.5	8	1	0	4	3	0.571429	392.714	0	561.25	168	318.286	129.75	569.667	175.143	83.25	297.667	540.286	771.5	232	27	9	8	10	10	7	3	0	0	7	7	0	0	0	0	2	2	4	2	0	0	0
GG2	29	+ve	E0	0	0	100	0	1	8	0	0	8	0	1	190.375	0	190.375	0	78.625	78.625	0	106.75	106.75	0	823.375	823.375	0	47	18	29	0	9	12	3	0	0	23	8	4	0	0	0	6	1	8	3	0	0	17
WT	11		Mean	2.27273	0	82.9545	14.7727	0.829545	8	0.181818	0	6.63636	1.18182	0.845779	571.166	0	588.049	359.212	229.774	255.411	123.955	372.659	416.515	105.333	483.607	500.622	151.758	39.9091	16	18.5455	5.36364	12.6364	11	2.27273	0.0909091	3	10.9091	7.81818	3.18182	0.272727	0	0.909091	3.81818	4.09091	6.63636	2	0.0909091	1.09091	4.63636
Grb10	13		Mean	2.88462	0	89.4231	7.69231	0.894231	8	0.230769	0	7.15385	0.615385	0.916209	413.824	0	427.487	151.731	157.354	132.587	201.09	264.821	245.576	248.013	764.338	801.442	149.231	48	17.9231	26.1538	3.92308	13.7692	11.3077	3.92308	0.307692	0.538462	18.1538	7.76923	3.53846	0.230769	0	0	6.38462	4.84615	7.15385	3.46154	0.307692	0.461538	9.92308
			SE	1.52459	0	5.13254	4.40112	0.0513254	0	0.121967	0	0.410603	0.352089	0.0466449	137.411	0	138.453	153.568	43.6123	66.9431	41.4608	156.738	171.983	30.7327	132.946	140.606	59.7507	5.42294	1.58974	3.1748	1.2081	1.45398	0.603023	0.54089	0.0909091	1.81409	2.72181	0.121967	0.600275	0.194978	0	0.494599	1.20467	1.35146	0.410603	0.587754	0.0909091	0.666804	1.39657
			SE	1.52033	0	4.44116	3.33087	0.0444116	0	0.121626	0	0.355292	0.266469	0.0376308	121.884	0	123.052	74.3316	38.7184	36.7545	107.439	117.511	107.79	197.994	87.9542	88.4887	74.505	10.3972	4.65263	6.4419	1.52526	2.64127	1.87215	1.86555	0.237093	0.36891	6.92806	0.121626	1.84188	0.166173	0	0	2.69743	2.49832	0.355292	1.75636	0.237093	0.312463	4.4151
Choice - B2		C2
GB0	29	WT	E0	0	0	100	0	1	8	0	0	8	0	1	378.125	0	378.125	0	81.375	81.375	0	913	913	0	130.75	130.75	0	38	15	18	5	12	11	1	0	0	14	8	3	0	0	0	4	4	8	1	0	0	5
GB1	36	WT	E0	75	12.5	0	12.5	0	8	6	1	0	1	0	2324	1468	0	3180	471	0	471	77	0	77	296	0	296	4	2	0	2	3	1	0	0	0	0	2	0	0	0	0	0	0	0	0	0	0	0
GF0	34	WT	E0	87.5	0	0	12.5	0	8	7	0	0	1	0	2957	0	0	2957	1580	0	1580	258	0	258	322	0	322	6	3	1	2	1	3	0	0	0	2	1	2	0	0	0	0	0	0	0	0	0	1
GF1	34	WT	E0	12.5	0	50	37.5	0.5	8	1	0	4	3	0.571429	1260.29	0	1686.25	692.333	535.286	606.75	440	99.4286	98.75	100.333	576.429	776.25	310	19	8	6	5	11	7	0	0	0	1	7	0	0	0	0	1	2	4	0	0	0	0
GC0	36	+ve	E0	0	0	75	25	0.75	8	0	0	6	2	0.75	557.5	0	338.333	1215	342.625	275.667	543.5	141	137	153	936.25	1113.5	404.5	45	13	20	12	17	8	3	0	0	17	8	0	0	0	0	5	6	6	2	0	0	6
GC1	35	WT	E0	0	0	75	25	0.75	8	0	0	6	2	0.75	640	0	760.167	279.5	252.25	228.5	323.5	117.625	118.167	116	238.25	226.833	272.5	34	12	17	5	12	12	7	0	0	3	8	4	0	0	0	0	4	6	4	0	0	3
GC2	34	+ve	E0	25	0	50	25	0.5	8	2	0	4	2	0.666667	366.5	0	426.5	246.5	96	77.75	132.5	230.167	87.75	515	870.333	1108	395	25	11	10	4	6	7	1	0	0	11	6	1	1	0	0	3	0	4	0	0	0	6
GC3	29	+ve	E0	0	0	100	0	1	8	0	0	8	0	1	178.875	0	178.875	0	51.375	51.375	0	68.125	68.125	0	1020.38	1020.38	0	40	13	27	0	8	11	17	0	0	4	8	3	0	0	0	2	0	8	17	0	0	2
GE0	29	+ve	E0	0	0	100	0	1	8	0	0	8	0	1	369.125	0	369.125	0	70.875	70.875	0	139.875	139.875	0	413.125	413.125	0	42	15	22	5	9	10	4	0	1	18	8	2	0	0	1	4	1	8	4	0	0	9
GE1	29	+ve	E0	0	0	100	0	1	8	0	0	8	0	1	273.25	0	273.25	0	154	154	0	201.125	201.125	0	574.75	574.75	0	26	16	10	0	9	12	1	0	0	4	8	4	0	0	0	4	1	8	1	0	0	0
GE2	34	WT	E0	12.5	12.5	62.5	12.5	0.625	8	1	1	5	1	0.833333	2271.71	3871	2159.2	1235	90.5	84.6	120	1992.67	1767.2	3120	38.6667	45.2	6	21	8	9	4	14	6	1	0	0	0	7	0	1	0	0	0	4	5	0	0	0	0
GE3	29	+ve	E0	0	0	87.5	12.5	0.875	8	0	0	7	1	0.875	181.125	0	187.143	139	141.75	113.143	342	1371.12	1556	77	409.375	420.571	331	20	10	8	2	9	9	1	0	1	0	8	1	0	0	1	0	1	7	0	0	0	0
GK1	37	WT	E0	50	12.5	25	12.5	0.25	8	4	1	2	1	0.666667	825.25	884	746.5	924	1617.67	1567.5	1718	203	264	81	638	811	292	29	8	13	8	5	6	6	1	2	9	4	3	0	0	0	1	1	2	5	1	2	2
GK2	27	WT	E0	0	0	87.5	12.5	0.875	8	0	0	7	1	0.875	382.875	0	430.857	47	140.375	105	388	247.75	261.857	149	23	20.1429	43	40	14	17	9	10	11	2	0	7	10	8	3	0	0	1	2	1	7	2	0	4	3
GK3	35	+ve	E0	0	0	100	0	1	8	0	0	8	0	1	1113.38	0	1113.38	0	74.125	74.125	0	198.5	198.5	0	631.25	631.25	0	20	8	9	3	12	8	0	0	0	0	8	0	0	0	0	0	1	8	0	0	0	0
GK4	29	+ve	E0	0	0	100	0	1	8	0	0	8	0	1	147.25	0	147.25	0	138.125	138.125	0	89.375	89.375	0	1007.38	1007.38	0	162	78	84	0	21	31	19	3	0	88	8	23	6	1	0	40	13	8	13	2	0	48
GA0	34	WT	E0	25	0	75	0	0.75	8	2	0	6	0	1	831.167	0	831.167	0	305.333	305.333	0	91.1667	91.1667	0	232.5	232.5	0	21	8	12	1	11	6	1	0	3	0	6	0	0	0	2	0	5	6	1	0	0	0
GA1	29	WT	E0	0	0	50	50	0.5	8	0	0	4	4	0.5	361.5	0	334.25	388.75	148.5	171	126	73.125	54.5	91.75	579	825	333	22	9	9	4	12	9	1	0	0	0	8	1	0	0	0	0	4	4	1	0	0	0
GA2	29	+ve	E0	12.5	0	62.5	25	0.625	8	1	0	5	2	0.714286	2172.71	0	2120.2	2304	551.571	458.4	784.5	1461.14	1709.8	839.5	25.4286	28	19	17	9	5	3	7	9	1	0	0	0	7	2	0	0	0	0	0	5	0	0	0	0
GJ1	37	+ve	E0	37.5	0	37.5	25	0.375	8	3	0	3	2	0.6	2512.2	0	2867.33	1979.5	1141	864.333	1556	1769.4	130	4228.5	342.4	525.667	67.5	18	5	6	7	10	5	1	0	0	2	5	0	0	0	0	0	3	3	0	0	0	0
GJ2	34	+ve	E0	37.5	0	62.5	0	0.625	8	3	0	5	0	1	934.4	0	934.4	0	156.4	156.4	0	113.2	113.2	0	654	654	0	31	11	17	3	17	7	1	0	0	6	5	2	0	0	0	4	10	5	1	0	0	1
GJ3	34	WT	E0	0	0	100	0	1	8	0	0	8	0	1	242.5	0	242.5	0	187.625	187.625	0	94.25	94.25	0	215.125	215.125	0	26	14	12	0	10	11	0	0	0	5	8	3	0	0	0	3	2	8	0	0	0	2
GG1	34	+ve	E0	50	0	37.5	12.5	0.375	8	4	0	3	1	0.75	1479.5	0	1468	1514	311	310.667	312	148.25	148.333	148	583.75	708.333	210	22	10	6	6	10	9	2	0	0	1	4	5	0	0	0	1	1	3	2	0	0	0
GG2	29	+ve	E0	37.5	0	62.5	0	0.625	8	3	0	5	0	1	625.4	0	625.4	0	205.6	205.6	0	287.2	287.2	0	726.2	726.2	0	16	5	11	0	6	5	4	0	0	1	5	0	0	0	0	0	1	5	4	0	0	1
WT	11		Mean	23.8636	3.40909	56.8182	15.9091	0.568182	8	1.90909	0.272727	4.54545	1.27273	0.654221	1134.04	565.727	688.092	882.144	491.81	303.426	469.682	378.819	332.99	363.008	299.065	298.436	170.409	23.6364	9.18182	10.3636	4.09091	9.18182	7.54545	1.72727	0.0909091	1.09091	4	6.09091	1.72727	0.0909091	0	0.272727	1	2.45455	4.54545	1.27273	0.0909091	0.545455	1.45455
Grb10	13		Mean	15.3846	0	75	9.61538	0.75	8	1.23077	0	6	0.769231	0.873535	839.324	0	849.937	569.077	264.188	226.958	282.346	478.345	374.329	458.538	630.355	687.011	109.769	37.2308	15.6923	18.0769	3.46154	10.8462	10.0769	4.23077	0.230769	0.153846	11.6923	6.76923	3.30769	0.538462	0.0769231	0.153846	4.84615	2.92308	6	3.38462	0.153846	0	5.61538
			SE	9.74891	1.76045	10.8402	4.79432	0.108402	0	0.779913	0.140836	0.867217	0.383546	0.110185	286.164	361.821	204.994	348.843	170.816	136.42	183.952	177.023	162.9	276.637	64.5425	101.468	46.7355	3.50395	1.29206	1.85017	0.836166	1.27078	1.08178	0.739667	0.0909091	0.666804	1.4771	0.779913	0.468865	0.0909091	0	0.194978	0.426401	0.545455	0.867217	0.523813	0.0909091	0.389957	0.511035
			SE	5.32476	0	6.78776	3.21313	0.0678776	0	0.425981	0	0.543021	0.25705	0.0427765	216.456	0	234.529	238.388	82.6205	62.1004	127.286	169.337	155.985	321.934	80.2762	87.6331	45.403	10.7502	5.27377	5.81384	0.964866	1.29519	1.83436	1.73262	0.230769	0.104154	6.58999	0.425981	1.69987	0.461538	0.0769231	0.104154	2.97607	1.15726	0.543021	1.50016	0.153846	0	3.62777
Choice - B3		C3
GB0	29	WT	E0	12.5	0	87.5	0	0.875	8	1	0	7	0	1	440.571	0	440.571	0	68	68	0	879.143	879.143	0	121.429	121.429	0	28	9	16	3	16	7	1	0	0	4	7	0	0	0	0	2	8	7	1	0	0	0
GB1	36	WT	E0	62.5	12.5	12.5	12.5	0.125	8	5	1	1	1	0.5	1142.33	1077	2095	255	508	168	848	798	92	1504	535	1056	14	9	4	2	3	6	3	0	0	0	0	3	1	0	0	0	0	1	1	0	0	0	0
GF0	34	WT	E0	75	0	25	0	0.25	8	6	0	2	0	1	1594.5	0	1594.5	0	339.5	339.5	0	1191.5	1191.5	0	25	25	0	7	3	3	1	3	3	1	0	0	0	2	1	0	0	0	0	0	2	1	0	0	0
GF1	34	WT	E0	50	0	37.5	12.5	0.375	8	4	0	3	1	0.75	518.25	0	556.667	403	599.25	187.667	1834	5950.75	7494	1321	534.5	602.667	330	17	7	7	3	6	4	0	0	5	2	4	0	0	0	3	0	1	3	0	0	2	1
GC0	36	+ve	E0	100	0	0	0	0	8	8	0	0	0	0	0	0	0	0	0	0	0	0	0	0	0	0	0	33	7	12	14	7	0	0	0	0	26	0	0	0	0	0	7	4	0	0	0	0	8
GC1	35	WT	E0	0	12.5	75	12.5	0.75	8	0	1	6	1	0.857143	1155.12	1324	670.667	3893	330.286	343.667	250	206.714	218	139	96.4286	84.3333	169	15	8	6	1	8	7	0	0	0	0	8	0	0	0	0	0	0	6	0	0	0	0
GC2	34	+ve	E0	50	0	37.5	12.5	0.375	8	4	0	3	1	0.75	2159.5	0	2516	1090	546.25	696.667	95	2566.25	2770	1955	170.5	114.333	339	15	7	6	2	6	6	0	1	1	1	4	2	0	0	0	1	1	3	0	1	1	0
GC3	29	+ve	E0	0	0	100	0	1	8	0	0	8	0	1	648.625	0	648.625	0	113.125	113.125	0	100.75	100.75	0	547.5	547.5	0	28	11	17	0	8	11	9	0	0	0	8	3	0	0	0	0	0	8	9	0	0	0
GE0	29	+ve	E0	0	0	87.5	12.5	0.875	8	0	0	7	1	0.875	760.5	0	780.286	622	149.125	136.286	239	173	174.429	163	319.25	341.286	165	19	8	9	2	9	8	1	0	1	0	8	0	0	0	0	0	1	7	1	0	0	0
GE1	29	+ve	E0	0	12.5	62.5	25	0.625	8	0	1	5	2	0.714286	577.875	75	626.8	707	265.571	90	704.5	83.1429	36.8	199	490.571	586	252	18	9	5	4	8	8	2	0	0	0	8	1	0	0	0	0	0	5	0	0	0	0
GE2	34	WT	E0	62.5	0	12.5	25	0.125	8	5	0	1	2	0.333333	503.667	0	81	715	106	27	145.5	617.667	651	601	110	20	155	12	3	3	6	9	3	0	0	0	0	3	0	0	0	0	0	2	1	0	0	0	0
GE3	29	+ve	E0	12.5	0	87.5	0	0.875	8	1	0	7	0	1	962.571	0	962.571	0	137.571	137.571	0	661.143	661.143	0	532.571	532.571	0	19	10	9	0	8	10	0	0	0	1	7	3	0	0	0	0	1	7	0	0	0	1
GK1	37	WT	E0	100	0	0	0	0	8	8	0	0	0	0	0	0	0	0	0	0	0	0	0	0	0	0	0	12	2	3	7	4	0	0	0	0	8	0	0	0	0	0	2	0	0	0	0	0	3
GK2	27	WT	E0	0	12.5	50	37.5	0.5	8	0	1	4	3	0.571429	637.5	154	1067.25	225.667	228.571	150.25	333	307.857	418.25	160.667	33.8571	32.5	35.6667	35	15	13	7	10	11	1	0	0	13	8	4	0	0	0	3	1	4	1	0	0	7
GK3	35	+ve	E0	75	0	12.5	12.5	0.125	8	6	0	1	1	0.5	2221	0	3996	446	186	255	117	2685.5	4214	1157	407.5	85	730	8	2	3	3	5	2	0	0	0	1	2	0	0	0	0	0	2	1	0	0	0	0
GK4	29	+ve	E0	0	0	100	0	1	8	0	0	8	0	1	405	0	405	0	268.625	268.625	0	107.625	107.625	0	806.375	806.375	0	101	61	40	0	11	45	25	9	0	11	8	37	8	1	0	7	3	8	17	8	0	4
GA0	34	WT	E0	12.5	0	87.5	0	0.875	8	1	0	7	0	1	843.571	0	843.571	0	311.714	311.714	0	116.714	116.714	0	401	401	0	26	8	15	3	13	8	1	0	0	4	7	1	0	0	0	0	6	7	1	0	0	1
GA1	29	WT	E0	0	0	100	0	1	8	0	0	8	0	1	816.75	0	816.75	0	253.375	253.375	0	64.625	64.625	0	853	853	0	28	11	15	2	16	10	1	0	0	1	8	2	0	0	0	1	6	8	1	0	0	0
GA2	29	+ve	E0	62.5	0	25	12.5	0.25	8	5	0	2	1	0.666667	542.333	0	662	303	350	295.5	459	1222.33	1472.5	722	23	29	11	10	6	3	1	3	5	1	0	0	1	3	2	0	0	0	1	0	2	1	0	0	0
GJ1	37	+ve	E0	62.5	12.5	25	0	0.25	8	5	1	2	0	1	1491	1987	1243	0	980.5	980.5	0	1275	1275	0	26.5	26.5	0	12	4	7	1	6	3	1	0	0	2	3	1	0	0	0	0	3	2	1	0	0	1
GJ2	34	+ve	E0	25	12.5	37.5	25	0.375	8	2	1	3	2	0.6	1110.5	1062	463	2106	368.4	327.333	430	208.2	266.333	121	301.2	404	147	37	10	21	6	16	7	4	2	0	8	6	2	0	0	0	2	8	3	3	2	0	5
GJ3	34	WT	E0	25	12.5	50	12.5	0.5	8	2	1	4	1	0.8	1838.17	3487	1388.75	1987	424.6	141.5	1557	91.6	87	110	204.8	241	60	16	6	7	3	11	5	0	0	0	0	6	0	0	0	0	0	3	4	0	0	0	0
GG1	34	+ve	E0	62.5	0	37.5	0	0.375	8	5	0	3	0	1	1175.33	0	1175.33	0	98	98	0	777.333	777.333	0	529.333	529.333	0	11	3	5	3	6	3	2	0	0	0	3	0	0	0	0	0	0	3	2	0	0	0
GG2	29	+ve	E0	75	12.5	12.5	0	0.125	8	6	1	1	0	1	2435	948	3922	0	352	352	0	897	897	0	357	357	0	9	3	6	0	5	2	0	0	0	2	2	1	0	0	0	0	3	1	0	0	0	2
WT	11		Mean	36.3636	4.54545	48.8636	10.2273	0.488636	8	2.90909	0.363636	3.90909	0.818182	0.710173	862.767	549.273	868.611	679.879	288.118	180.97	451.591	929.506	1019.29	348.697	265.001	312.448	69.4242	18.6364	6.90909	8.18182	3.54545	9.27273	5.54545	0.454545	0	0.454545	2.90909	5.09091	0.818182	0	0	0.272727	0.727273	2.54545	3.90909	0.454545	0	0.181818	1.09091
Grb10	13		Mean	40.3846	3.84615	48.0769	7.69231	0.480769	8	3.23077	0.307692	3.84615	0.615385	0.777381	1114.56	313.231	1338.51	405.692	293.474	288.508	157.269	827.483	980.993	332.077	347.023	335.3	126.462	24.6154	10.8462	11	2.76923	7.53846	8.46154	3.46154	0.923077	0.153846	4.07692	4.76923	4	0.615385	0.0769231	0	1.38462	2	3.84615	2.61538	0.846154	0.0769231	1.61538
			SE	10.5871	1.9015	10.4521	3.69973	0.104521	0	0.846968	0.15212	0.836166	0.295979	0.0989504	161.638	327.207	191.615	366.911	55.4434	36.4158	201.318	515.947	657.849	167.549	83.541	111.8	32.1272	2.75771	1.17902	1.66142	0.651762	1.34226	1.01232	0.157459	0	0.454545	1.26817	0.846968	0.377026	0	0	0.272727	0.332782	0.85667	0.836166	0.157459	0	0.181818	0.653029
			SE	9.82151	1.66543	9.79008	2.66238	0.0979008	0	0.785721	0.133235	0.783206	0.21299	0.081516	210.796	173.665	362.342	172.856	69.9398	75.4559	64.5596	252.725	346.081	166.587	67.2446	72.7069	59.5053	6.8627	4.259	2.83296	1.0631	0.903096	3.18171	1.92359	0.69302	0.104154	2.05208	0.785721	2.76656	0.615385	0.0769231	0	0.711971	0.630425	0.783206	1.37998	0.618581	0.0769231	0.70291
Forced - B1		F1		DNS	Omits	Left	Right	Inco	Trials	DNS	Omits	Left	Right	Inco
GB0	29	WT	E0	0	0	50	50	0.5	4	0	0	2	2	0	410	0	197	623	183	70.5	295.5	588.5	878.5	298.5	163.75	188	139.5	22	12	5	5	7	6	1	0	0	8	4	2	0	0	0	6	3	2	0	0	0	0
GB1	36	WT	E0	0	0	50	50	0.5	4	0	0	2	2	0	857.5	0	900.5	814.5	308.75	283	334.5	106.5	110	103	863	1289.5	436.5	11	7	2	2	4	5	2	0	0	0	4	1	2	0	0	0	0	2	0	0	0	0
GF0	34	WT	E0	0	0	50	50	0.5	4	0	0	2	2	0	415.5	0	397	434	252.75	188.5	317	117.25	91	143.5	87.75	46.5	129	21	5	11	5	9	5	3	0	1	3	4	1	0	0	0	0	5	2	2	0	0	2
GF1	34	WT	E0	0	0	50	25	0.5	4	0	0	2	1	1	169.75	0	234	75	311.667	381.5	172	70.6667	70	72	1038.33	1318.5	478	25	14	8	3	5	8	0	0	0	12	4	4	0	0	0	6	1	3	0	0	0	4
GC0	36	+ve	E0	0	0	50	25	0.5	4	0	0	2	1	1	1763.75	0	1943	2326	1115	953.5	1438	132	141.5	113	1006.33	1152	715	30	13	10	7	11	9	2	0	0	8	4	5	0	0	0	4	4	3	1	0	0	2
GC1	35	WT	E0	0	0	50	50	0.5	4	0	0	2	2	0	694.75	0	662.5	727	401.25	289.5	513	103	96	110	369	430.5	307.5	25	11	8	6	4	11	4	0	0	6	4	7	0	0	0	0	0	2	0	0	0	6
GC2	34	+ve	E0	0	0	50	25	0.5	4	0	0	2	1	1	234	0	236	433	362.667	391	306	236.333	311.5	86	778.667	997.5	341	25	9	10	6	4	6	4	0	0	11	4	2	0	0	0	3	0	3	4	0	0	3
GC3	29	+ve	E0	0	50	50	0	0.5	4	0	2	2	0	0	165.75	113.5	218	0	37.5	37.5	0	73	73	0	1622	1622	0	27	21	6	0	4	14	4	0	0	5	4	12	0	0	0	5	0	2	4	0	0	0
GE0	29	+ve	E0	0	0	50	25	0.5	4	0	0	2	1	1	364.75	0	370	599	298.333	250	395	99.6667	74.5	150	172.333	123.5	270	28	14	8	6	6	5	1	0	7	9	4	1	0	0	5	4	1	3	0	0	1	3
GE1	29	+ve	E0	0	0	50	50	0.5	4	0	0	2	2	0	112	0	70	154	192.5	110.5	274.5	330.25	622.5	38	390.5	433	348	16	8	2	6	4	7	1	0	0	4	4	3	0	0	0	1	0	2	0	0	0	0
GE2	34	WT	E0	0	0	50	50	0.5	4	0	0	2	2	0	1233	0	655.5	1810.5	587	314.5	859.5	1138.75	1951	326.5	42.5	45	40	16	8	5	3	8	7	1	0	0	0	4	3	1	0	0	0	3	2	0	0	0	0
GE3	29	+ve	E0	0	0	50	25	0.5	4	0	0	2	1	1	138.25	0	160	104	66.6667	59	82	64.6667	79	36	854.333	1119	325	10	5	4	1	5	5	0	0	0	0	4	1	0	0	0	0	1	3	0	0	0	0
GK1	37	WT	E0	0	0	50	50	0.5	4	0	0	2	2	0	219	0	143.5	294.5	218.5	83	354	67.5	58.5	76.5	663.25	895	431.5	19	8	4	7	6	5	2	0	0	6	4	1	1	0	0	2	0	2	0	0	0	2
GK2	27	WT	E0	0	0	25	50	0.25	4	0	0	1	2	1	963.75	0	60	1461.5	268.667	92	357	330.333	519	236	65	68	63.5	24	10	7	7	5	4	6	0	0	9	4	0	1	0	0	5	0	1	3	0	0	3
GK3	35	+ve	E0	0	0	50	25	0.5	4	0	0	2	1	1	452.75	0	799	143	68	45	114	189.333	216.5	135	716	891.5	365	22	10	8	4	5	4	1	0	0	12	4	0	1	0	0	5	1	3	0	0	0	4
GK4	29	+ve	E0	0	25	50	0	0.5	4	0	1	2	0	1	306	376	326	0	186.5	186.5	0	103.5	103.5	0	859	859	0	91	47	44	0	15	19	5	2	0	50	4	16	1	1	0	25	11	3	4	1	0	25
GA0	34	WT	E0	0	0	50	25	0.5	4	0	0	2	1	1	181.25	0	155.5	220	231.667	206	283	166	196.5	105	336.333	282.5	444	45	18	20	7	7	4	7	0	4	23	4	0	1	0	3	10	2	3	4	0	1	10
GA1	29	WT	E0	0	0	50	50	0.5	4	0	0	2	2	0	156.75	0	111	202.5	289	256	322	76	76	76	645	937	353	18	9	6	3	4	6	0	0	0	8	4	2	0	0	0	3	0	2	0	0	0	4
GA2	29	+ve	E0	0	0	50	25	0.5	4	0	0	2	1	1	321.75	0	372.5	78	203.333	267.5	75	820.333	856.5	748	20	26.5	7	25	8	16	1	4	4	4	1	0	12	4	0	0	0	0	4	0	3	4	1	0	8
GJ1	37	+ve	E0	0	0	50	50	0.5	4	0	0	2	2	0	664.5	0	890	439	626.75	1000.5	253	54.5	62	47	597	808.5	385.5	10	6	2	2	4	6	0	0	0	0	4	2	0	0	0	0	0	2	0	0	0	0
GJ2	34	+ve	E0	25	0	50	25	0.5	4	1	0	2	1	0	855	0	1193	179	669.333	300	1408	164.333	159	175	761	1011.5	260	11	3	6	2	5	3	1	0	0	2	3	0	0	0	0	0	2	2	1	0	0	1
GJ3	34	WT	E0	0	0	50	0	0.5	4	0	0	2	0	2	406.25	0	694	0	63	63	0	90.5	90.5	0	297.5	297.5	0	18	7	9	2	6	5	0	0	0	7	4	1	0	0	0	2	2	4	0	0	0	3
GG1	34	+ve	E0	0	0	50	25	0.5	4	0	0	2	1	1	689.75	0	492.5	1577	276.333	284.5	260	136.333	66.5	276	672.333	839	339	37	8	18	11	14	5	0	0	0	18	4	1	0	0	0	3	4	3	0	0	0	11
GG2	29	+ve	E0	0	0	50	0	0.5	4	0	0	2	0	2	805	0	875	0	69	69	0	91.5	91.5	0	952.5	952.5	0	21	7	14	0	4	5	1	0	0	11	4	1	0	0	0	2	0	4	1	0	0	9
WT	11		Mean	0	0	47.7273	40.9091	0.477273	4	0	0	1.90909	1.63636	0.454545	518.864	0	382.773	605.682	283.205	202.5	346.136	259.545	376.091	140.636	415.583	527.091	256.591	22.1818	9.90909	7.72727	4.54545	5.90909	6	2.36364	0	0.454545	7.45455	4	2	0.545455	0	0.272727	3.09091	1.45455	2.27273	0.818182	0	0.0909091	3.09091
Grb10	13		Mean	1.92308	5.76923	50	23.0769	0.5	4	0.0769231	0.230769	2	0.923077	0.769231	528.712	37.6538	611.154	464	320.917	304.192	354.269	191.981	219.808	138.769	723.231	833.5	258.115	27.1538	12.2308	11.3846	3.53846	6.53846	7.07692	1.84615	0.230769	0.538462	10.9231	3.92308	3.38462	0.153846	0.0769231	0.384615	4.30769	1.84615	2.76923	1.46154	0.153846	0.0769231	5.07692
			SE	0	0	2.27273	5.08197	0.0227273	0	0	0	0.0909091	0.203279	0.207305	110.604	0	88.4886	173.957	39.799	33.7207	63.9472	99.9078	175.347	30.892	102.574	148.384	55.5154	2.61053	1.11563	1.44027	0.60848	0.51265	0.617914	0.729542	0	0.365902	1.90866	0	0.617914	0.207305	0	0.272727	0.995029	0.511035	0.237062	0.443502	0	0.0909091	0.899035
			SE	1.92308	4.15432	0	4.44116	0	0	0.0769231	0.166173	0	0.177646	0.166173	124.609	29.5074	145.382	194.977	86.6217	88.5705	136.36	56.5624	68.2509	55.5742	110.591	118.696	58.0359	5.78996	3.16462	3.04988	0.951486	1.11295	1.26319	0.491546	0.166173	0.538462	3.57423	0.0769231	1.37998	0.104154	0.0769231	0.384615	1.79881	0.861172	0.166173	0.501477	0.104154	0.0769231	1.95285
Forced - B2		F2		DNS	Omits	Left	Right	Inco	Trials	DNS	Omits	Left	Right	Inco
GB0	29	WT	E0	0	0	50	25	0.5	4	0	0	2	1	1	566.75	0	423	1064	81.3333	42	160	2639.33	3820.5	277	112.333	110.5	116	22	9	10	3	8	5	2	0	1	6	4	1	0	0	1	3	4	3	1	0	0	2
GB1	36	WT	E0	25	0	50	25	0.5	4	1	0	2	1	0	2223	0	2035.5	2598	485.667	277	903	55.6667	52.5	62	849	1104.5	338	8	4	3	1	4	3	1	0	0	0	3	0	1	0	0	0	1	2	0	0	0	0
GF0	34	WT	E0	50	0	25	0	0.25	4	2	0	1	0	1	431	0	307	0	179	179	0	760	760	0	43	43	0	20	6	10	4	4	5	1	1	0	9	2	3	0	0	0	1	2	2	1	1	0	4
GF1	34	WT	E0	0	0	50	25	0.5	4	0	0	2	1	1	993.75	0	926.5	440	384	149	854	79.3333	74	90	831.667	1064.5	366	20	9	6	5	5	7	0	0	0	8	4	3	0	0	0	2	0	3	0	0	0	3
GC0	36	+ve	E0	0	0	25	0	0.25	4	0	0	1	0	3	695	0	627	0	601	601	0	175	175	0	1159	1159	0	29	10	10	9	11	5	1	0	0	12	4	1	0	0	0	5	2	3	1	0	0	4
GC1	35	WT	E0	0	0	50	25	0.5	4	0	0	2	1	1	495	0	411.5	549	245.333	162.5	411	103.333	99.5	111	354	441	180	19	8	9	2	9	7	2	0	0	1	4	3	0	0	0	1	4	3	2	0	0	0
GC2	34	+ve	E0	25	0	50	25	0.5	4	1	0	2	1	0	974	0	1108.5	705	301.333	49	806	130.333	75	241	803.667	1039	333	17	7	9	1	3	4	1	0	0	9	3	1	0	0	0	3	0	2	1	0	0	6
GC3	29	+ve	E0	0	25	50	0	0.5	4	0	1	2	0	1	230.25	81	224.5	0	36	36	0	79.5	79.5	0	1158.5	1158.5	0	15	7	8	0	4	5	3	1	0	2	4	2	0	0	0	1	0	3	3	1	0	1
GE0	29	+ve	E0	0	0	50	0	0.5	4	0	0	2	0	2	284.25	0	296	0	87.5	87.5	0	70	70	0	631	631	0	18	8	10	0	4	4	1	0	0	9	4	0	0	0	0	4	0	4	1	0	0	5
GE1	29	+ve	E0	0	0	50	50	0.5	4	0	0	2	2	0	157	0	84.5	229.5	192	69	315	13.5	7	20	485	676.5	293.5	18	7	9	2	6	5	0	0	0	7	4	1	0	0	0	2	2	2	0	0	0	5
GE2	34	WT	E0	0	0	50	25	0.5	4	0	0	2	1	1	783.5	0	1010.5	913	82.6667	28.5	191	1169	1605	297	35.6667	43.5	20	22	5	14	3	14	4	0	0	0	4	4	0	0	0	0	1	9	3	0	0	0	2
GE3	29	+ve	E0	0	0	50	25	0.5	4	0	0	2	1	1	133.5	0	193.5	105	135	146	113	546	816	6	508.667	571	384	12	6	5	1	5	6	0	0	0	1	4	2	0	0	0	0	1	3	0	0	0	1
GK1	37	WT	E0	0	25	0	50	0	4	0	1	0	2	1	960.75	2973	0	383.5	535	0	535	101.5	0	101.5	391	0	391	20	10	1	9	4	8	3	0	0	5	4	5	0	0	0	1	0	0	0	0	0	1
GK2	27	WT	E0	0	0	25	50	0.25	4	0	0	1	2	1	207.25	0	102	156	295	102	391.5	126.667	89	145.5	90	24	123	30	12	11	7	6	7	0	0	4	13	4	3	0	0	1	4	2	1	0	0	2	6
GK3	35	+ve	E0	0	0	50	25	0.5	4	0	0	2	1	1	245.75	0	199.5	363	238.333	44.5	626	149	60.5	326	597	796.5	198	17	6	9	2	7	6	0	0	0	4	4	2	0	0	0	0	2	3	0	0	0	4
GK4	29	+ve	E0	0	0	50	0	0.5	4	0	0	2	0	2	62	0	119	0	520	520	0	85.5	85.5	0	992.5	992.5	0	118	50	68	0	10	28	6	3	0	71	4	24	0	0	0	22	6	4	6	3	0	49
GA0	34	WT	E0	0	0	50	0	0.5	4	0	0	2	0	2	268.5	0	278	0	123	123	0	65.5	65.5	0	59.5	59.5	0	24	10	11	3	6	5	1	0	8	4	4	1	0	0	4	1	2	4	1	0	2	2
GA1	29	WT	E0	0	0	50	25	0.5	4	0	0	2	1	1	331.25	0	257.5	263	171.667	47	421	65.6667	56.5	84	684	859.5	333	16	6	9	1	9	5	1	0	0	1	4	1	0	0	0	1	5	3	1	0	0	0
GA2	29	+ve	E0	0	0	50	0	0.5	4	0	0	2	0	2	1369.25	0	509	0	124	124	0	1833.5	1833.5	0	46	46	0	26	8	16	2	6	7	0	0	0	13	4	3	0	0	0	1	2	4	0	0	0	10
GJ1	37	+ve	E0	75	0	25	0	0.25	4	3	0	1	0	0	2618	0	2618	0	824	824	0	76	76	0	834	834	0	10	1	5	4	7	1	1	0	0	1	1	0	0	0	0	0	3	1	1	0	0	0
GJ2	34	+ve	E0	25	0	50	25	0.5	4	1	0	2	1	0	830	0	857	776	177.667	220.5	92	115.667	117	113	739	956.5	304	12	3	8	1	7	3	2	0	0	0	3	0	0	0	0	0	4	2	2	0	0	0
GJ3	34	WT	E0	0	0	50	0	0.5	4	0	0	2	0	2	412.75	0	382	0	42	42	0	89	89	0	304	304	0	15	6	9	0	6	4	0	0	0	5	4	0	0	0	0	2	2	4	0	0	0	3
GG1	34	+ve	E0	100	0	0	0	0	4	4	0	0	0	0	0	0	0	0	0	0	0	0	0	0	0	0	0	5	1	4	0	3	0	0	0	0	2	0	0	0	0	0	1	3	0	0	0	0	1
GG2	29	+ve	E0	0	0	50	0	0.5	4	0	0	2	0	2	232	0	239	0	58	58	0	102.5	102.5	0	780	780	0	21	8	13	0	5	6	1	0	0	9	4	2	0	0	0	2	1	4	1	0	0	7
WT	11		Mean	6.81818	2.27273	40.9091	22.7273	0.409091	4	0.272727	0.0909091	1.63636	0.909091	1.09091	697.591	270.273	557.591	578.773	238.606	104.727	351.5	477.727	610.136	106.182	341.288	368.545	169.727	19.6364	7.72727	8.45455	3.45455	6.81818	5.45455	1	0.0909091	1.18182	5.09091	3.72727	1.81818	0.0909091	0	0.545455	1.54545	2.81818	2.54545	0.545455	0.0909091	0.363636	2.09091
Grb10	13		Mean	17.3077	1.92308	42.3077	11.5385	0.423077	4	0.692308	0.0769231	1.69231	0.461538	1.07692	602.385	6.23077	544.269	167.577	253.449	213.808	150.154	259.731	269.038	54.3077	671.872	741.577	116.346	24.4615	9.38462	13.3846	1.69231	6	6.15385	1.23077	0.307692	0	10.7692	3.30769	2.92308	0	0	0	3.15385	2	2.69231	1.23077	0.307692	0	7.15385
			SE	4.87446	2.27273	5.08197	5.28134	0.0508197	0	0.194978	0.0909091	0.203279	0.211254	0.162623	172.161	270.273	174.388	228.952	50.6645	25.0116	96.925	242.388	352.863	30.7055	95.2064	131.588	48.2865	1.6748	0.751857	1.13108	0.813116	0.91272	0.474124	0.301511	0.0909091	0.77246	1.16349	0.194978	0.501238	0.0909091	0	0.365902	0.340151	0.78414	0.365902	0.207305	0.0909091	0.243935	0.563343
			SE	9.12195	1.92308	4.37121	4.57784	0.0437121	0	0.364878	0.0769231	0.174848	0.183114	0.28782	202.966	6.23077	194.674	77.1943	68.7553	72.6367	74.6303	136.369	142.664	29.8737	99.6377	102.471	43.8627	7.99328	3.4688	4.63894	0.692308	0.679366	1.90427	0.468957	0.237093	0	5.16665	0.364878	1.77757	0	0	0	1.63239	0.480384	0.346865	0.468957	0.237093	0	3.58567
Forced - B3		F3		DNS	Omits	Left	Right	Inco	Trials	DNS	Omits	Left	Right	Inco
GB0	29	WT	E0	0	0	50	0	0.5	4	0	0	2	0	2	253.5	0	116	0	45	45	0	779.5	779.5	0	144	144	0	19	10	7	2	6	5	0	0	0	8	4	1	0	0	0	5	2	4	0	0	0	1
GB1	36	WT	E0	25	25	0	0	0	4	1	1	0	0	2	1775.33	2422	0	0	0	0	0	0	0	0	0	0	0	8	5	3	0	3	4	0	0	0	1	3	2	0	0	0	0	0	2	0	0	0	1
GF0	34	WT	E0	100	0	0	0	0	4	4	0	0	0	0	0	0	0	0	0	0	0	0	0	0	0	0	0	2	0	2	0	0	0	0	0	0	2	0	0	0	0	0	0	0	0	0	0	0	2
GF1	34	WT	E0	25	25	50	0	0.5	4	1	1	2	0	0	1349.67	430	1809.5	0	828.5	828.5	0	11242	11242	0	16.5	16.5	0	17	8	5	4	4	2	1	0	8	2	3	0	0	0	3	2	0	2	1	0	2	0
GC0	36	+ve	E0	75	0	0	25	0	4	3	0	0	1	0	3017	0	0	3017	528	0	528	191	0	191	370	0	370	26	9	6	11	7	1	1	0	0	17	1	0	1	0	0	7	3	0	0	0	0	3
GC1	35	WT	E0	0	0	50	50	0.5	4	0	0	2	2	0	786.75	0	854	719.5	482	205.5	758.5	170.75	232.5	109	227.5	237	218	12	7	3	2	5	7	0	0	0	0	4	3	0	0	0	0	1	2	0	0	0	0
GC2	34	+ve	E0	0	0	25	0	0.25	4	0	0	1	0	3	893.75	0	147	0	52	52	0	115	115	0	983	983	0	10	4	4	2	4	4	0	0	0	2	4	0	0	0	0	0	0	3	0	0	0	1
GC3	29	+ve	E0	0	50	50	0	0.5	4	0	2	2	0	0	419.25	536	302.5	0	101	101	0	72	72	0	933.5	933.5	0	9	6	3	0	4	4	1	0	0	0	4	2	0	0	0	0	0	2	1	0	0	0
GE0	29	+ve	E0	0	0	50	25	0.5	4	0	0	2	1	1	216.75	0	269.5	222	339	215.5	586	80.6667	73	96	297	317.5	256	18	7	10	1	7	6	0	0	0	5	4	2	0	0	0	1	3	3	0	0	0	4
GE1	29	+ve	E0	0	0	50	25	0.5	4	0	0	2	1	1	672	0	598.5	1055	150	58.5	333	66.6667	42	116	499	591.5	314	14	8	5	1	4	8	1	0	0	1	4	4	0	0	0	0	0	3	1	0	0	1
GE2	34	WT	E0	0	0	25	25	0.25	4	0	0	1	1	2	962.75	0	1565	1370	150.5	205	96	446.5	295	598	3	4	2	14	7	3	4	5	5	0	0	0	4	4	1	0	0	0	2	0	2	0	0	0	1
GE3	29	+ve	E0	0	0	50	25	0.5	4	0	0	2	1	1	247.75	0	160	525	61.3333	49.5	85	431	641	11	412	480.5	275	9	5	3	1	4	5	0	0	0	0	4	1	0	0	0	0	0	3	0	0	0	0
GK1	37	WT	E0	75	0	25	0	0.25	4	3	0	1	0	0	2273	0	2273	0	709	709	0	113	113	0	707	707	0	12	2	7	3	4	2	2	0	0	4	1	1	0	0	0	0	3	1	2	0	0	1
GK2	27	WT	E0	0	0	50	50	0.5	4	0	0	2	2	0	145.5	0	115	176	445	688	202	176.75	153	200.5	13.25	11	15.5	26	7	14	5	8	6	2	0	1	9	4	2	0	0	0	1	3	2	2	0	1	6
GK3	35	+ve	E0	25	0	25	25	0.25	4	1	0	1	1	1	1780	0	3021	2210	746	474	1018	4658	4390	4926	56	24	88	13	6	3	4	4	4	2	0	2	1	3	1	0	0	2	0	0	2	1	0	0	0
GK4	29	+ve	E0	0	0	50	0	0.5	4	0	0	2	0	2	127.75	0	71.5	0	251	251	0	83	83	0	768.5	768.5	0	82	43	39	0	10	19	6	0	0	47	4	15	3	0	0	21	6	4	3	0	0	26
GA0	34	WT	E0	0	0	50	50	0.5	4	0	0	2	2	0	804.25	0	515	1093.5	871	842	900	84.25	97.5	71	167.75	71	264.5	17	6	5	6	6	5	0	0	2	4	4	1	0	0	1	0	2	2	0	0	1	0
GA1	29	WT	E0	0	0	50	50	0.5	4	0	0	2	2	0	370.25	0	612.5	128	363.75	589.5	138	105.5	120.5	90.5	638.25	982.5	294	9	5	2	2	4	5	0	0	0	0	4	1	0	0	0	0	0	2	0	0	0	0
GA2	29	+ve	E0	100	0	0	0	0	4	4	0	0	0	0	0	0	0	0	0	0	0	0	0	0	0	0	0	0	0	0	0	0	0	0	0	0	0	0	0	0	0	0	0	0	0	0	0	0	0
GJ1	37	+ve	E0	75	25	0	0	0	4	3	1	0	0	0	3815	3815	0	0	0	0	0	0	0	0	0	0	0	4	1	2	1	1	0	0	0	0	3	1	0	0	0	0	0	0	0	0	0	0	2
GJ2	34	+ve	E0	25	0	50	25	0.5	4	1	0	2	1	0	818.667	0	1105.5	245	595	740	305	138	130.5	153	512.333	688.5	160	24	8	8	8	4	8	7	0	0	5	3	5	0	0	0	0	0	2	5	0	0	1
GJ3	34	WT	E0	0	0	50	0	0.5	4	0	0	2	0	2	678.75	0	1006.5	0	310	310	0	108.5	108.5	0	276.5	276.5	0	15	5	10	0	9	4	0	0	0	2	4	0	0	0	0	1	5	4	0	0	0	1
GG1	34	+ve	E0	0	0	50	25	0.5	4	0	0	2	1	1	1189.75	0	737.5	2163	103.333	104	102	345.333	422	192	341.333	418	188	14	7	5	2	5	7	0	0	0	2	4	3	0	0	0	0	0	3	0	0	0	2
GG2	29	+ve	E0	50	25	25	0	0.25	4	2	1	1	0	0	1778	3221	335	0	1841	1841	0	251	251	0	619	619	0	4	3	1	0	2	2	0	0	0	0	2	1	0	0	0	0	0	1	0	0	0	0
WT	11		Mean	20.4545	4.54545	36.3636	20.4545	0.363636	4	0.818182	0.181818	1.45455	0.818182	0.727273	854.523	259.273	806.045	317	382.25	402.045	190.409	1202.43	1194.68	97.1818	199.432	222.682	72.1818	13.7273	5.63636	5.54545	2.54545	4.90909	4.09091	0.454545	0	1	3.27273	3.18182	1.09091	0	0	0.363636	1	1.45455	2.09091	0.454545	0	0.363636	1.18182
Grb10	13		Mean	26.9231	7.69231	32.6923	13.4615	0.326923	4	1.07692	0.307692	1.30769	0.538462	0.769231	1151.97	582.462	519.077	725.923	366.744	298.962	227.462	494.744	478.423	437.308	445.513	448	127	17.4615	8.23077	6.84615	2.38462	4.30769	5.23077	1.38462	0	0.153846	6.38462	2.92308	2.61538	0.307692	0	0.153846	2.23077	0.923077	2	0.846154	0	0	3.07692
			SE	10.5627	3.04918	6.18249	7.39946	0.0618249	0	0.422507	0.121967	0.247299	0.295979	0.30424	212.849	219.742	236.502	151.727	96.4792	101.051	97.9598	1006.29	1006.81	53.8541	76.7078	99.0181	36.5379	1.90736	0.834187	1.13108	0.623241	0.731804	0.609837	0.247299	0	0.726135	0.895351	0.422507	0.28459	0	0	0.278722	0.467099	0.511035	0.342572	0.247299	0	0.203279	0.519058
			SE	9.9926	4.37121	5.92732	3.59775	0.0592732	0	0.399704	0.174848	0.237093	0.14391	0.25705	323.95	365.201	227.537	292.123	140.006	141.844	87.9774	348.759	330.093	374.67	89.7713	99.1374	38.8676	5.76863	2.99391	2.78468	0.944203	0.728404	1.37819	0.655729	0	0.153846	3.61361	0.399704	1.12397	0.237093	0	0.153846	1.6531	0.524545	0.375534	0.421325	0	0	1.94297
Choice Total		CT		DNS	Omits	Left	Right	All Bias
GB0	29	WT	E0	4.16667	0	95.8333	0	0.958333	24	1	0	23	0	1	401.043	0	401.043	0	78.4348	78.4348	0	1146.04	1146.04	0	121.739	121.739	0	149	52	77	20	51	28	8	0	16	46	23	5	0	0	4	20	26	23	8	0	6	14
GB1	36	WT	E0	50	8.33333	29.1667	12.5	0.291667	24	12	2	7	3	0.7	1728.5	1272.5	1876.29	1687.67	415.4	387.143	481.333	220	71.4286	566.667	880.5	1153	244.667	33	15	12	6	19	13	1	0	0	0	12	3	0	0	0	0	4	7	1	0	0	0
GF0	34	WT	E0	58.3333	0	25	16.6667	0.25	24	14	0	6	4	0.6	1164.1	0	992.333	1421.75	598.4	672.167	487.75	599.9	840.333	239.25	139.9	82.1667	226.5	37	18	13	6	12	18	2	0	0	5	10	8	0	0	0	0	1	6	2	0	0	4
GF1	34	WT	E0	20.8333	0	62.5	16.6667	0.625	24	5	0	15	4	0.789474	797.263	0	844.533	620	443.737	351.8	788.5	1322.16	1566.6	405.5	879.947	1030.6	315	67	29	28	10	27	20	2	0	5	13	19	1	0	0	3	6	5	15	2	0	2	4
GC0	36	+ve	E0	33.3333	0	54.1667	12.5	0.541667	24	8	0	13	3	0.8125	587.875	0	512.615	914	308.125	194.077	802.333	115.625	108.692	145.667	1041.75	1150.92	568.667	128	38	45	45	45	17	6	0	0	60	16	1	1	0	0	20	14	13	2	0	0	16
GC1	35	WT	E0	0	4.16667	70.8333	25	0.708333	24	0	1	17	6	0.73913	714.583	1324	638.647	828.167	274.652	256.471	326.167	151.13	163.647	115.667	224.696	199.941	294.833	80	35	36	9	28	33	9	0	0	10	24	10	0	0	0	1	4	17	6	0	0	9
GC2	34	+ve	E0	25	0	62.5	12.5	0.625	24	6	0	15	3	0.833333	740.833	0	783.467	527.667	179.278	191.133	120	680.611	617.733	995	795.056	878.8	376.333	74	36	30	8	20	24	2	1	1	26	18	6	1	0	0	11	1	15	1	1	1	11
GC3	29	+ve	E0	4.16667	0	95.8333	0	0.958333	24	1	0	23	0	1	328.652	0	328.652	0	69.9565	69.9565	0	81.3913	81.3913	0	888.174	888.174	0	99	32	67	0	23	29	37	1	0	9	23	6	0	0	0	3	0	23	37	1	0	6
GE0	29	+ve	E0	0	0	95.8333	4.16667	0.958333	24	0	0	23	1	0.958333	541.083	0	537.565	622	106.875	101.13	239	123.958	122.261	163	423.25	434.478	165	105	37	58	10	35	28	8	0	2	32	24	4	0	0	1	8	11	23	8	0	0	16
GE1	29	+ve	E0	0	4.16667	87.5	8.33333	0.875	24	0	1	21	2	0.913043	316.167	75	290.429	707	161.87	110.19	704.5	166.348	163.238	199	544.043	571.857	252	70	34	28	8	25	28	3	0	0	14	24	5	0	0	0	5	1	21	1	0	0	5
GE2	34	WT	E0	25	4.16667	50	20.8333	0.5	24	6	1	12	5	0.705882	1311	3871	1335.08	741.2	139.706	135.833	149	1341.18	1493.17	976.4	53.2353	46.25	70	65	24	27	14	42	20	3	0	0	0	18	3	3	0	0	0	15	12	0	0	0	0
GE3	29	+ve	E0	4.16667	0	91.6667	4.16667	0.916667	24	1	0	22	1	0.956522	410.087	0	422.409	139	117.739	107.545	342	926.696	965.318	77	482.391	489.273	331	68	29	37	2	34	28	1	0	4	1	23	5	0	0	1	0	11	22	0	0	3	1
GK1	37	WT	E0	50	4.16667	33.3333	12.5	0.333333	24	12	1	8	3	0.727273	566.583	884	554.25	493.667	692.545	639.875	833	121	131.5	93	788.091	912.125	457.333	78	27	26	25	19	19	9	1	2	28	12	8	0	0	0	7	1	8	8	1	2	6
GK2	27	WT	E0	0	4.16667	75	20.8333	0.75	24	0	1	18	5	0.782609	418.833	154	506.944	154.6	157	116.556	302.6	278.435	308.667	169.6	26.913	24.1667	36.8	133	52	53	28	29	36	8	1	21	38	24	13	0	0	5	10	2	18	8	1	9	15
GK3	35	+ve	E0	25	0	66.6667	8.33333	0.666667	24	6	0	16	2	0.888889	781.111	0	844.438	274.5	78.2222	78	80	418.833	389.75	651.5	712.111	736.25	519	77	29	34	14	30	19	0	0	0	28	18	1	0	0	0	10	4	16	0	0	0	14
GK4	29	+ve	E0	0	0	100	0	1	24	0	0	24	0	1	208.208	0	208.208	0	200.167	200.167	0	110.667	110.667	0	905.958	905.958	0	429	211	218	0	41	109	68	15	0	196	24	85	16	2	0	84	17	24	52	13	0	112
GA0	34	WT	E0	12.5	0	87.5	0	0.875	24	3	0	21	0	1	717.095	0	717.095	0	249.429	249.429	0	90.9048	90.9048	0	366.524	366.524	0	98	32	58	8	39	23	2	0	6	28	21	2	0	0	4	5	18	21	2	0	1	16
GA1	29	WT	E0	0	0	83.3333	16.6667	0.833333	24	0	0	20	4	0.833333	459.833	0	474.05	388.75	160.333	167.2	126	62.7917	57	91.75	718.833	796	333	83	35	37	11	41	30	3	0	0	9	24	6	0	0	0	5	13	20	3	0	0	1
GA2	29	+ve	E0	25	0	58.3333	16.6667	0.583333	24	6	0	14	4	0.777778	1074	0	992.786	1358.25	329.944	263.071	564	1461.44	1521.43	1251.5	29.8889	30.8571	26.5	66	32	28	6	19	27	2	0	4	14	18	9	0	0	0	5	1	14	1	0	3	9
GJ1	37	+ve	E0	37.5	4.16667	41.6667	16.6667	0.416667	24	9	1	10	4	0.714286	1537.33	1987	1537.9	1423.5	809.929	732	1004.75	847	331.2	2136.5	521.786	627.8	256.75	49	19	20	10	25	18	2	0	0	4	15	4	0	0	0	0	8	10	1	0	0	1
GJ2	34	+ve	E0	20.8333	4.16667	66.6667	8.33333	0.666667	24	5	1	16	2	0.888889	1291.84	1062	1204.44	2106	197.611	168.562	430	141.611	144.188	121	726.722	799.188	147	131	33	88	10	75	23	8	2	0	23	19	5	0	0	0	9	51	16	7	2	0	12
GJ3	34	WT	E0	8.33333	4.16667	79.1667	8.33333	0.791667	24	2	1	19	2	0.904762	680.409	3487	479.053	1190	217.333	154.158	817.5	96.4286	95.3684	106.5	238.238	254.474	84	81	34	41	6	35	25	2	0	0	19	22	4	1	0	0	7	11	19	1	0	0	10
GG1	34	+ve	E0	41.6667	0	41.6667	16.6667	0.416667	24	10	0	10	4	0.714286	870.929	0	1017.5	504.5	269	174.5	505.25	296.5	311	260.25	550.357	679.9	226.5	60	22	19	19	26	19	7	0	0	8	14	5	0	0	0	3	3	10	6	0	0	0
GG2	29	+ve	E0	37.5	4.16667	58.3333	0	0.583333	24	9	1	14	0	1	634.667	948	612.286	0	143.5	143.5	0	227.643	227.643	0	755.357	755.357	0	72	26	46	0	20	19	7	0	0	26	15	5	0	0	0	6	5	14	7	0	0	20
WT	11		Mean	20.8333	2.65152	62.8788	13.6364	0.628788	24	5	0.636364	15.0909	3.27273	0.798406	814.477	999.318	801.756	684.164	311.543	291.733	391.986	493.633	542.242	251.303	403.511	453.362	187.467	82.1818	32.0909	37.0909	13	31.0909	24.0909	4.45455	0.181818	4.54545	17.8182	19	5.72727	0.363636	0	1.45455	5.54545	9.09091	15.0909	3.72727	0.181818	1.81818	7.18182
Grb10	13		Mean	19.5513	1.28205	70.8333	8.33333	0.708333	24	4.69231	0.307692	17	2	0.881374	717.138	313.231	714.822	659.724	228.632	194.91	368.603	430.641	391.885	461.571	644.373	688.37	220.673	109.846	44.4615	55.2308	10.1538	32.1538	29.8462	11.6154	1.46154	0.846154	33.9231	19.3077	10.8462	1.38462	0.153846	0.153846	12.6154	9.76923	17	9.46154	1.30769	0.538462	17.1538
			SE	6.69502	0.846995	7.50535	2.45483	0.0750535	0	1.6068	0.203279	1.80129	0.589158	0.0381771	126.37	429.97	135.889	169.898	60.334	61.5408	95.3153	157.383	181.762	89.0355	103.393	130.021	47.106	10.5777	3.57378	5.8906	2.3741	3.54056	2.11684	0.985012	0.121967	2.2048	4.64331	1.6068	1.11266	0.278722	0	0.623241	1.77541	2.46597	1.80129	0.944755	0.121967	0.902705	1.80815
			SE	4.41021	0.555144	5.77813	1.76525	0.0577813	0	1.05845	0.133235	1.38675	0.423659	0.028703	109.724	173.665	109.245	178.995	53.5266	47.3526	92.5583	118.073	116.985	178.157	72.4491	76.3882	53.1771	27.5054	13.9659	14.6235	3.31052	4.22727	6.70997	5.38462	1.14139	0.421325	14.1645	1.05845	6.20571	1.22233	0.153846	0.104154	6.12743	3.75901	1.38675	4.46872	0.989591	0.312463	8.10021
Forced Total		FT		DNS	Omits	Left	Right	Inco	Trials	DNS	Omits	Left	Right	Inco
GB0	29	WT	E0	0	0	50	25	0.5	12	0	0	6	3	3	410.083	0	245.333	770	118.444	52.5	250.333	1314.56	1826.17	291.333	142.222	147.5	131.667	63	31	22	10	21	16	3	0	1	22	12	4	0	0	1	14	9	9	1	0	0	3
GB1	36	WT	E0	16.6667	8.33333	33.3333	25	0.333333	12	2	1	4	3	2	1542.5	2422	1468	1409	384.571	280	524	84.7143	81.25	89.3333	857	1197	403.667	27	16	8	3	11	12	3	0	0	1	10	3	3	0	0	0	1	6	0	0	0	1
GF0	34	WT	E0	50	0	25	16.6667	0.25	12	6	0	3	2	1	420.667	0	367	434	238	185.333	317	245.8	314	143.5	78.8	45.3333	129	43	11	23	9	13	10	4	1	1	14	6	4	0	0	0	1	7	4	3	1	0	8
GF1	34	WT	E0	8.33333	8.33333	50	16.6667	0.5	12	1	1	6	2	2	791.182	430	990	257.5	468	453	513	2866.75	3795.33	81	705.375	799.833	422	62	31	19	12	14	17	1	0	8	22	11	7	0	0	3	10	1	8	1	0	2	7
GC0	36	+ve	E0	25	0	25	16.6667	0.25	12	3	0	3	2	4	1428	0	1504.33	2671.5	894.8	836	983	152.4	152.667	152	909.6	1154.33	542.5	85	32	26	27	29	15	4	0	0	37	9	6	1	0	0	16	9	6	2	0	0	9
GC1	35	WT	E0	0	0	50	41.6667	0.5	12	0	0	6	5	1	658.833	0	642.667	688.4	388.091	219.167	590.8	127.727	142.667	109.8	313.455	369.5	246.2	56	26	20	10	18	25	6	0	0	7	12	13	0	0	0	1	5	7	2	0	0	6
GC2	34	+ve	E0	8.33333	0	41.6667	16.6667	0.416667	12	1	0	5	2	4	675.727	0	567.2	569	292	186.4	556	173.571	177.6	163.5	818.571	1011.2	337	52	20	23	9	11	14	5	0	0	22	11	3	0	0	0	6	0	8	5	0	0	10
GC3	29	+ve	E0	0	41.6667	50	0	0.5	12	0	5	6	0	1	271.75	276	248.333	0	58.1667	58.1667	0	74.8333	74.8333	0	1238	1238	0	51	34	17	0	12	23	8	1	0	7	12	16	0	0	0	6	0	7	8	1	0	1
GE0	29	+ve	E0	0	0	50	16.6667	0.5	12	0	0	6	2	4	288.583	0	311.833	410.5	260.875	184.333	490.5	85.125	72.5	123	333.75	357.333	263	64	29	28	7	17	15	2	0	7	23	12	3	0	0	5	9	4	10	1	0	1	12
GE1	29	+ve	E0	0	0	50	41.6667	0.5	12	0	0	6	5	1	313.667	0	251	364.4	180.727	79.3333	302.4	143.182	223.833	46.4	454.455	567	319.4	48	23	16	9	14	20	2	0	0	12	12	8	0	0	0	3	2	7	1	0	0	6
GE2	34	WT	E0	0	0	41.6667	33.3333	0.416667	12	0	0	5	4	3	993.083	0	979.4	1476	321.889	178.2	501.5	995	1481.4	387	31.4444	36.2	25.5	52	20	22	10	27	16	1	0	0	8	12	4	1	0	0	3	12	7	0	0	0	3
GE3	29	+ve	E0	0	0	50	25	0.5	12	0	0	6	3	3	173.167	0	171.167	244.667	87.6667	84.8333	93.3333	347.222	512	17.6667	591.667	723.5	328	31	16	12	3	14	16	0	0	0	1	12	4	0	0	0	0	2	9	0	0	0	1
GK1	37	WT	E0	25	8.33333	25	33.3333	0.25	12	3	1	3	4	1	776.889	2973	853.333	339	379	291.667	444.5	83.7143	76.6667	89	591.714	832.333	411.25	51	20	12	19	14	15	7	0	0	15	9	7	1	0	0	3	3	3	2	0	0	4
GK2	27	WT	E0	0	0	33.3333	50	0.333333	12	0	0	4	6	2	438.833	0	98	597.833	347.1	392.5	316.833	207.8	228.5	194	51.8	28.5	67.3333	80	29	32	19	19	17	8	0	5	31	12	5	1	0	1	10	5	4	5	0	3	15
GK3	35	+ve	E0	8.33333	0	41.6667	25	0.416667	12	1	0	5	3	3	739.455	0	1003.6	905.333	301.375	130.6	586	1291.38	988.8	1795.67	506.375	680	217	52	22	20	10	16	14	3	0	2	17	11	3	1	0	2	5	3	8	1	0	0	8
GK4	29	+ve	E0	0	8.33333	50	0	0.5	12	0	1	6	0	5	165.25	376	172.167	0	319.167	319.167	0	90.6667	90.6667	0	873.333	873.333	0	291	140	151	0	35	66	17	5	0	168	12	55	4	1	0	68	23	11	13	4	0	100
GA0	34	WT	E0	0	0	50	25	0.5	12	0	0	6	3	3	418	0	316.167	802.333	491.667	390.333	694.333	107.333	119.833	82.3333	199.889	137.667	324.333	86	34	36	16	19	14	8	0	14	31	12	2	1	0	8	11	6	9	5	0	4	12
GA1	29	WT	E0	0	0	50	41.6667	0.5	12	0	0	6	5	1	286.083	0	327	184.8	284.182	297.5	268.2	83.9091	84.3333	83.4	653.182	926.333	325.4	43	20	17	6	17	16	1	0	0	9	12	4	0	0	0	4	5	7	1	0	0	4
GA2	29	+ve	E0	33.3333	0	33.3333	8.33333	0.333333	12	4	0	4	1	3	845.5	0	440.75	78	171.6	195.75	75	1225.6	1345	748	30.4	36.25	7	51	16	32	3	10	11	4	1	0	25	8	3	0	0	0	5	2	7	4	1	0	18
GJ1	37	+ve	E0	50	8.33333	25	16.6667	0.25	12	6	1	3	2	0	1515.17	3815	1466	439	666.2	941.667	253	58.8	66.6667	47	644.4	817	385.5	24	8	9	7	12	7	1	0	0	4	6	2	0	0	0	0	3	3	1	0	0	2
GJ2	34	+ve	E0	25	0	50	25	0.5	12	3	0	6	3	0	834.556	0	1051.83	400	480.667	420.167	601.667	139.333	135.5	147	670.778	885.5	241.333	47	14	22	11	16	14	10	0	0	7	9	5	0	0	0	0	6	6	8	0	0	2
GJ3	34	WT	E0	0	0	50	0	0.5	12	0	0	6	0	6	499.25	0	694.167	0	138.333	138.333	0	96	96	0	292.667	292.667	0	48	18	28	2	21	13	0	0	0	14	12	1	0	0	0	5	9	12	0	0	0	7
GG1	34	+ve	E0	33.3333	0	33.3333	16.6667	0.333333	12	4	0	4	2	2	939.75	0	615	1870	189.833	194.25	181	240.833	244.25	234	506.833	628.5	263.5	56	16	27	13	22	12	0	0	0	22	8	4	0	0	0	4	7	6	0	0	0	14
GG2	29	+ve	E0	16.6667	8.33333	41.6667	0	0.416667	12	2	1	5	0	4	770.4	3221	512.6	0	419	419	0	127.8	127.8	0	816.8	816.8	0	46	18	28	0	11	13	2	0	0	20	10	4	0	0	0	4	1	9	2	0	0	16
WT	11		Mean	9.09091	2.27273	41.6667	28.0303	0.416667	12	1.09091	0.272727	5	3.36364	2.27273	657.764	529.545	634.642	632.624	323.571	261.685	401.864	564.846	749.65	140.973	356.141	437.533	226.032	55.5455	23.2727	21.7273	10.5455	17.6364	15.5455	3.81818	0.0909091	2.63636	15.8182	10.9091	4.90909	0.636364	0	1.18182	5.63636	5.72727	6.90909	1.81818	0.0909091	0.818182	6.36364
Grb10	13		Mean	15.3846	5.12821	41.6667	16.0256	0.416667	12	1.84615	0.615385	5	1.92308	2.61538	689.305	591.385	639.678	611.723	332.467	311.513	317.069	319.288	324.009	267.249	645.766	752.981	223.403	69.0769	29.8462	31.6154	7.61538	16.8462	18.4615	4.46154	0.538462	0.692308	28.0769	10.1538	8.92308	0.461538	0.0769231	0.538462	9.69231	4.76923	7.46154	3.53846	0.461538	0.0769231	15.3077
			SE	4.82713	1.17363	3.17821	4.24513	0.0317821	0	0.579256	0.140836	0.381385	0.509415	0.449058	109.272	327.596	124.254	142.484	36.4183	36.477	58.5432	262.655	356.327	33.3737	88.8077	127.375	48.5252	5.0836	2.21191	2.46093	1.72871	1.37029	1.15494	0.902705	0.0909091	1.38349	2.93821	0.579256	0.976585	0.278722	0	0.736308	1.44142	1.02772	0.791484	0.552978	0.0909091	0.443502	1.25244
			SE	4.60766	3.20513	2.6688	3.33087	0.026688	0	0.552919	0.384615	0.320256	0.399704	0.460469	123.056	363.389	130.19	221.193	65.5044	78.3149	84.6197	117.592	110.562	138.708	83.4422	88.786	48.122	18.9268	9.40734	10.1233	2.03034	2.09348	4.10693	1.32343	0.385895	0.547542	11.9869	0.552919	3.97018	0.312463	0.0769231	0.402164	5.00177	1.69143	0.573064	1.09554	0.312463	0.0769231	7.23452
[truncated: 103 more columns]

## Sheet: E0-Averages
Grb10 - DelRei									Last E1 session				Delays are : Adjusted=1s, non-adjusted=1s in all blocks									FE0F										The following data are responses/zone (as in parts of each trial):								Z0:Initiation Stimulus on, Z1: Choice stimuli on, Z2: in delay to reward, Z3:Reward delivery, Z4: In ITI
																	All latencines are in s				All latencines are in s				All latencines are in s
				% Responses				All		Responses				% (AD/NA)	Latency to Initiate (CP)				Latency to respond (NP)			Latency to collect			Duration of first eat (PP)			Number of NPs				All NPs						Centre NPs only						Adjusted NPs only
Subject	Session	Gtype	Task	DNS	Omits	AD	NA	Bias	Trials	DNS	Omits	AD	NA	Bias	All	Omits	AD	NA	All	AD	NA	All	AD	NA	All	AD	NA	All	Centre	AD	NA	0	1	2	3	4	5	0	1	2	3	4	5	0	1	2	3	4	5
Session Last -1
Choice - B1		C1
GB0	28	WT	E0	0	0	100	0	1	8	0	0	8	0	1	390.75	0	390.75	0	173.125	173.125	0	1039.38	1039.38	0	165.125	165.125	0	48	22	17	9	14	11	1	0	0	22	8	3	0	0	0	11	6	8	1	0	0	2
GB1	35	WT	E0	37.5	12.5	25	25	0.25	8	3	1	2	2	0.5	1002.6	454	1326	953.5	801.75	881.5	722	101	76.5	125.5	654	958.5	349.5	18	11	4	3	6	8	2	0	0	2	5	4	2	0	0	0	0	2	0	0	0	2
GF0	33	WT	E0	37.5	0	25	37.5	0.25	8	3	0	2	3	0.4	810.2	0	1090	623.667	267.6	344.5	216.333	407.6	666.5	235	130.4	93	155.333	20	6	9	5	12	5	2	0	0	1	5	0	1	0	0	0	6	2	1	0	0	0
GF1	33	WT	E0	0	0	87.5	12.5	0.875	8	0	0	7	1	0.875	285.75	0	303.571	161	159.375	162.286	139	82.875	75.4286	135	1129	1224.71	459	28	15	9	4	9	8	0	0	0	11	8	0	0	0	0	7	1	7	0	0	0	1
GC0	35	+ve	E0	0	0	37.5	62.5	0.375	8	0	0	3	5	0.375	1154.62	0	2206.67	523.4	421	140.333	589.4	135.375	92	161.4	731.625	1154.67	477.8	63	22	24	17	27	10	5	0	0	21	8	2	4	0	0	8	11	3	0	0	0	10
GC1	34	WT	E0	0	12.5	37.5	50	0.375	8	0	1	3	4	0.428571	725.375	1788	463	656.5	303.429	166.667	406	137.857	104.667	162.75	277.571	390.667	192.75	49	28	13	8	12	23	6	0	0	8	8	16	4	0	0	0	4	3	1	0	0	5
GC2	33	+ve	E0	0	0	100	0	1	8	0	0	8	0	1	365.75	0	365.75	0	57.75	57.75	0	616	616	0	544.125	544.125	0	24	11	11	2	8	11	1	0	0	4	8	3	0	0	0	0	0	8	1	0	0	2
GC3	28	+ve	E0	0	0	100	0	1	8	0	0	8	0	1	168	0	168	0	39.25	39.25	0	81.875	81.875	0	1109.5	1109.5	0	40	9	31	0	11	9	19	1	0	0	8	1	0	0	0	0	3	8	19	1	0	0
GE0	28	+ve	E0	0	0	87.5	12.5	0.875	8	0	0	7	1	0.875	372.875	0	405.143	147	190.875	172	323	104.25	108.714	73	263.5	269.286	223	38	14	18	6	9	10	4	1	3	11	8	2	0	0	2	2	1	7	3	0	0	7
GE1	28	+ve	E0	0	0	100	0	1	8	0	0	8	0	1	93.75	0	93.75	0	100	100	0	213.875	213.875	0	562.125	562.125	0	28	12	15	1	10	9	1	0	0	8	8	1	0	0	0	3	2	8	1	0	0	4
GE2	33	WT	E0	0	0	87.5	12.5	0.875	8	0	0	7	1	0.875	868	0	790.143	1413	144.25	77	615	1141	1260.43	305	22.375	21.7143	27	32	10	19	3	19	9	1	0	0	3	8	1	1	0	0	0	9	7	0	0	0	3
GE3	28	+ve	E0	0	0	100	0	1	8	0	0	8	0	1	203.875	0	203.875	0	66.375	66.375	0	1478.75	1478.75	0	166.875	166.875	0	34	10	24	0	13	8	0	0	3	10	8	0	0	0	1	1	5	8	0	0	2	9
GK1	36	WT	E0	0	0	62.5	37.5	0.625	8	0	0	5	3	0.625	316.375	0	343.2	271.667	309.25	183.8	518.333	85.625	63.4	122.667	766.125	953.4	454	52	19	15	18	10	13	8	0	0	21	8	5	0	0	0	6	0	5	4	0	0	6
GK2	26	WT	E0	0	0	62.5	37.5	0.625	8	0	0	5	3	0.625	324.5	0	328.4	318	123.375	92.6	174.667	382	533.2	130	31.5	33.8	27.6667	72	25	34	13	9	13	8	2	6	34	8	5	2	0	2	8	1	5	5	2	0	21
GK3	34	+ve	E0	0	0	100	0	1	8	0	0	8	0	1	170.625	0	170.625	0	81.625	81.625	0	197.75	197.75	0	888	888	0	43	18	24	1	10	9	0	0	0	24	8	1	0	0	0	9	2	8	0	0	0	14
GK4	28	+ve	E0	0	0	100	0	1	8	0	0	8	0	1	121.375	0	121.375	0	203.25	203.25	0	129	129	0	852.375	852.375	0	180	74	106	0	23	37	21	12	0	87	8	29	4	0	0	33	15	8	17	12	0	54
GA0	33	WT	E0	0	0	100	0	1	8	0	0	8	0	1	305.875	0	305.875	0	230.75	230.75	0	96.625	96.625	0	128.875	128.875	0	42	17	24	1	14	8	0	0	10	10	8	0	0	0	5	4	6	8	0	0	4	6
GA1	28	WT	E0	0	0	75	25	0.75	8	0	0	6	2	0.75	175.625	0	194.667	118.5	57.75	51.1667	77.5	48.875	40.6667	73.5	669	798.333	281	33	15	16	2	8	11	1	0	0	13	8	3	1	0	0	3	0	6	0	0	0	10
GA2	28	+ve	E0	0	0	87.5	12.5	0.875	8	0	0	7	1	0.875	380.75	0	353.429	572	117.625	74.7143	418	894.5	944.429	545	30.75	30.5714	32	34	15	16	3	10	8	1	0	0	15	8	0	1	0	0	6	2	7	0	0	0	7
GJ1	36	+ve	E0	0	12.5	50	37.5	0.5	8	0	1	4	3	0.571429	616.375	419	774	472	553.429	866.25	136.333	71.4286	80.5	59.3333	713.571	956.5	389.667	19	9	5	5	10	8	0	0	0	1	8	1	0	0	0	0	1	4	0	0	0	0
GJ2	33	+ve	E0	12.5	0	75	12.5	0.75	8	1	0	6	1	0.857143	646.714	0	657.667	581	131.143	141.667	68	251.857	234	359	733.143	818.167	223	46	12	31	3	19	9	2	0	0	16	7	2	0	0	0	3	10	6	2	0	0	13
GJ3	33	WT	E0	0	0	87.5	12.5	0.875	8	0	0	7	1	0.875	253.125	0	250	275	59.625	58	71	108.25	107.571	113	85.25	89.7143	54	35	12	21	2	13	8	2	0	8	4	8	0	1	0	3	0	5	7	1	0	5	3
GG1	33	+ve	E0	12.5	0	87.5	0	0.875	8	1	0	7	0	1	573.143	0	573.143	0	157.857	157.857	0	138.429	138.429	0	720.857	720.857	0	43	14	23	6	11	10	1	0	0	21	7	3	0	0	0	4	1	7	1	0	0	14
GG2	28	+ve	E0	0	0	100	0	1	8	0	0	8	0	1	175.375	0	175.375	0	103.5	103.5	0	120.5	120.5	0	945.875	945.875	0	57	21	36	0	15	12	3	0	0	27	8	4	0	0	0	9	7	8	3	0	0	18
WT	11		Mean	6.81818	2.27273	68.1818	22.7273	0.681818	8	0.545455	0.181818	5.45455	1.81818	0.723052	496.198	203.818	525.964	435.53	239.116	220.127	267.258	330.098	369.487	127.492	369.02	441.622	181.841	39	16.3636	16.4545	6.18182	11.4545	10.6364	2.81818	0.181818	2.18182	11.7273	7.45455	3.36364	1.09091	0	0.909091	3.54545	3.45455	5.45455	1.18182	0.181818	0.818182	5.36364
Grb10	12		Mean	1.92308	0.961538	86.5385	10.5769	0.865385	8	0.153846	0.0769231	6.92308	0.846154	0.888736	387.941	32.2308	482.215	176.569	171.052	169.582	118.056	341.045	341.217	92.1333	635.563	693.763	103.497	49.9231	18.5385	28	3.38462	13.5385	11.5385	4.46154	1.07692	0.461538	18.8462	7.84615	3.76923	0.692308	0	0.230769	6	4.61538	6.92308	3.61538	1	0.153846	11.6923
			SE	4.57378	1.52459	8.48857	5.00516	0.0848857	0	0.365902	0.121967	0.679085	0.400413	0.066295	88.4769	163.654	113.076	132.447	62.1372	70.9872	77.1656	119.182	132.968	26.9737	112.234	135.996	53.9252	4.74054	2.01933	2.47299	1.61143	1.08178	1.4351	0.91272	0.181818	1.15851	3.09278	0.365902	1.40307	0.368154	0	0.51265	1.19365	0.956923	0.679085	0.519058	0.181818	0.552978	1.78005
			SE	1.35509	1.0008	5.97694	5.48161	0.0597694	0	0.108407	0.0800641	0.478155	0.438529	0.0568271	86.3734	33.5468	162.074	73.4936	43.582	62.0454	57.0375	120.584	122.699	49.3326	91.3405	103.222	48.6885	11.8172	4.96182	7.20243	1.34649	1.70219	2.23487	2.04333	0.953514	0.325222	6.41271	0.108407	2.2147	0.431158	0	0.172958	2.53037	1.36187	0.478155	1.87283	0.957427	0.160128	4.01626
Choice - B2		C2
GB0	28	WT	E0	0	0	100	0	1	8	0	0	8	0	1	852.875	0	852.875	0	160.625	160.625	0	2011.5	2011.5	0	79.375	79.375	0	39	12	17	10	15	11	3	0	3	7	8	3	0	0	0	1	6	8	3	0	0	0
GB1	35	WT	E0	37.5	12.5	50	0	0.5	8	3	1	4	0	1	1986.6	1960	1993.25	0	574.25	574.25	0	80.5	80.5	0	918	918	0	10	6	4	0	5	5	0	0	0	0	5	1	0	0	0	0	0	4	0	0	0	0
GF0	33	WT	E0	87.5	0	12.5	0	0.125	8	7	0	1	0	1	2668	0	2668	0	206	206	0	1115	1115	0	29	29	0	4	2	2	0	2	2	0	0	0	0	1	1	0	0	0	0	1	1	0	0	0	0
GF1	33	WT	E0	50	25	25	0	0.25	8	4	2	2	0	1	1728.5	1382.5	2074.5	0	148	148	0	2305.5	2305.5	0	650	650	0	9	6	2	1	5	3	0	0	0	1	4	1	0	0	0	1	0	2	0	0	0	0
GC0	35	+ve	E0	25	12.5	12.5	50	0.125	8	2	1	1	4	0.2	2072.17	2197	1443	2198.25	860.2	620	920.25	137.6	95	148.25	503.4	916	400.25	44	18	7	19	13	11	2	0	0	18	6	6	0	0	0	6	3	1	0	0	0	3
GC1	34	WT	E0	0	0	75	25	0.75	8	0	0	6	2	0.75	732.25	0	691.5	854.5	313.625	257.833	481	117.25	108.5	143.5	247.375	262.667	201.5	42	13	25	4	9	11	5	0	0	17	8	3	0	0	0	2	1	6	3	0	0	15
GC2	33	+ve	E0	50	0	50	0	0.5	8	4	0	4	0	1	1637.25	0	1637.25	0	160.5	160.5	0	508.5	508.5	0	691.5	691.5	0	8	4	4	0	4	4	0	0	0	0	4	0	0	0	0	0	0	4	0	0	0	0
GC3	28	+ve	E0	0	0	100	0	1	8	0	0	8	0	1	454.5	0	454.5	0	49.25	49.25	0	77.5	77.5	0	1022.25	1022.25	0	41	10	31	0	15	9	15	1	0	1	8	1	0	0	0	1	7	8	15	1	0	0
GE0	28	+ve	E0	0	0	87.5	12.5	0.875	8	0	0	7	1	0.875	371	0	401	161	176.125	152.429	342	119.125	116.286	139	172.5	164.571	228	28	10	13	5	8	8	3	0	0	9	8	0	0	0	0	2	0	7	3	0	0	3
GE1	28	+ve	E0	0	0	100	0	1	8	0	0	8	0	1	210.25	0	210.25	0	73.5	73.5	0	24.875	24.875	0	620.25	620.25	0	26	11	12	3	9	11	1	0	0	5	8	3	0	0	0	0	1	8	1	0	0	2
GE2	33	WT	E0	12.5	0	75	12.5	0.75	8	1	0	6	1	0.857143	1542.29	0	1494	1832	148.714	103.667	419	1278.29	1444.5	281	27.7143	27.8333	27	32	13	14	5	19	11	1	0	0	1	7	4	1	0	0	1	8	6	0	0	0	0
GE3	28	+ve	E0	0	0	87.5	12.5	0.875	8	0	0	7	1	0.875	374.25	0	125.857	2113	164.5	158.571	206	594.75	668.714	77	511.125	540.286	307	22	13	8	1	8	11	1	2	0	0	8	3	1	1	0	0	0	7	0	1	0	0
GK1	36	WT	E0	100	0	0	0	0	8	8	0	0	0	0	0	0	0	0	0	0	0	0	0	0	0	0	0	24	2	3	19	3	0	0	0	0	21	0	0	0	0	0	2	0	0	0	0	0	3
GK2	26	WT	E0	0	0	37.5	62.5	0.375	8	0	0	3	5	0.375	559.375	0	149.667	805.2	221.5	85.6667	303	211.125	230.667	199.4	38	19.3333	49.2	61	24	20	17	11	17	5	1	4	23	8	9	1	0	0	6	2	3	2	1	3	9
GK3	34	+ve	E0	0	0	100	0	1	8	0	0	8	0	1	543.625	0	543.625	0	70.625	70.625	0	340.5	340.5	0	646	646	0	28	11	16	1	15	9	1	0	0	3	8	1	0	0	0	2	6	8	1	0	0	1
GK4	28	+ve	E0	0	0	100	0	1	8	0	0	8	0	1	132.625	0	132.625	0	170.375	170.375	0	134.25	134.25	0	868.5	868.5	0	106	42	64	0	13	26	16	7	3	41	8	18	2	0	0	14	5	8	14	7	3	27
GA0	33	WT	E0	0	0	100	0	1	8	0	0	8	0	1	358.625	0	358.625	0	189	189	0	65.375	65.375	0	213.375	213.375	0	48	20	25	3	16	9	1	0	5	17	8	1	0	0	2	9	8	8	1	0	3	5
GA1	28	WT	E0	0	0	87.5	12.5	0.875	8	0	0	7	1	0.875	426.625	0	235.143	1767	59.5	51.8571	113	57.25	53.2857	85	737.25	803.857	271	26	12	11	3	10	10	1	0	0	5	8	2	0	0	0	2	2	7	1	0	0	1
GA2	28	+ve	E0	0	0	100	0	1	8	0	0	8	0	1	310.125	0	310.125	0	189.5	189.5	0	1369.62	1369.62	0	21.625	21.625	0	24	10	14	0	8	8	1	0	0	7	8	0	0	0	0	2	0	8	1	0	0	5
GJ1	36	+ve	E0	87.5	12.5	0	0	0	8	7	1	0	0	0	1045	1045	0	0	0	0	0	0	0	0	0	0	0	3	2	1	0	2	0	0	0	0	1	1	0	0	0	0	1	1	0	0	0	0	0
GJ2	33	+ve	E0	12.5	0	62.5	25	0.625	8	1	0	5	2	0.714286	1287.57	0	1490.6	780	265.286	302	173.5	149	143.6	162.5	673.857	843.2	250.5	44	15	26	3	20	12	5	0	0	7	7	5	1	0	0	2	13	5	4	0	0	4
GJ3	33	WT	E0	0	0	62.5	37.5	0.625	8	0	0	5	3	0.625	261.5	0	261	262.333	65.375	61.6	71.6667	203.75	213.2	188	61.75	62.8	60	44	15	23	6	16	9	3	0	1	15	8	1	1	0	0	5	7	5	2	0	1	8
GG1	33	+ve	E0	50	12.5	37.5	0	0.375	8	4	1	3	0	1	1310.5	68	1724.67	0	59.6667	59.6667	0	285	285	0	501.333	501.333	0	13	4	3	6	5	3	0	0	0	5	4	0	0	0	0	0	0	3	0	0	0	0
GG2	28	+ve	E0	12.5	0	87.5	0	0.875	8	1	0	7	0	1	849.429	0	849.429	0	275.286	275.286	0	128.429	128.429	0	681.429	681.429	0	24	12	12	0	10	10	1	0	0	3	7	3	0	0	0	2	3	7	1	0	0	1
WT	11		Mean	26.1364	3.40909	56.8182	13.6364	0.568182	8	2.09091	0.272727	4.54545	1.09091	0.771104	1010.6	303.864	979.869	501.912	189.69	167.136	126.152	676.867	693.457	81.5364	272.894	278.749	55.3364	30.8182	11.3636	13.2727	6.18182	10.0909	8	1.72727	0.0909091	1.18182	9.72727	5.90909	2.36364	0.272727	0	0.181818	2.63636	3.18182	4.54545	1.09091	0.0909091	0.636364	3.72727
Grb10	12		Mean	18.2692	2.88462	71.1538	7.69231	0.711538	8	1.46154	0.230769	5.69231	0.615385	0.82033	815.253	254.615	717.148	404.019	193.447	175.516	126.288	297.627	299.406	40.5192	531.828	578.226	91.2115	31.6154	12.4615	16.2308	2.92308	10	9.38462	3.53846	0.769231	0.230769	7.69231	6.53846	3.07692	0.307692	0.0769231	0	2.46154	3	5.69231	3.07692	0.692308	0.230769	3.53846
			SE	11.3636	2.43723	10.4397	6.18249	0.104397	0	0.909091	0.194978	0.835177	0.494599	0.0978615	254.989	207.523	278.719	216.475	46.434	46.6507	55.725	257.839	261.561	31.443	100.429	103.724	28.1408	5.45364	2.10313	2.82872	1.96708	1.7656	1.50151	0.589158	0.0909091	0.569181	2.71055	0.909091	0.754052	0.140836	0	0.181818	0.855705	1.00741	0.835177	0.368154	0.0909091	0.363636	1.51412
			SE	8.01683	1.58241	10.247	4.30461	0.10247	0	0.641346	0.126592	0.819761	0.344369	0.0962211	176.004	187.836	183.173	232.877	62.6262	46.1252	75.8758	106.401	108.581	19.056	88.0812	95.6764	42.5758	7.41483	2.86893	4.8278	1.51594	1.45774	1.7738	1.58384	0.567081	0.240192	3.21106	0.641346	1.42137	0.181988	0.0800641	0	1.10312	1.12423	0.819761	1.50675	0.557582	0.240192	2.09369
Choice - B3		C3
GB0	28	WT	E0	25	0	50	25	0.5	8	2	0	4	2	0.666667	1162.83	0	1482.25	524	264.5	220.25	353	514.667	664.5	215	161.833	128	229.5	23	10	6	7	8	6	3	0	0	6	6	0	2	0	0	2	2	4	0	0	0	0
GB1	35	WT	E0	62.5	0	25	12.5	0.25	8	5	0	2	1	0.666667	2077	0	1466	3299	1151.67	775	1905	3408	88	10048	569.333	829	50	7	3	3	1	3	3	1	0	0	0	3	0	0	0	0	0	0	2	1	0	0	0
GF0	33	WT	E0	75	0	0	25	0	8	6	0	0	2	0	1861	0	0	1861	122.5	0	122.5	386.5	0	386.5	103.5	0	103.5	10	3	2	5	5	2	0	0	0	3	2	0	0	0	0	1	0	0	0	0	0	2
GF1	33	WT	E0	62.5	0	25	12.5	0.25	8	5	0	2	1	0.666667	632.667	0	625	648	443	224	881	3398.33	3723.5	2748	435.333	643	20	16	7	2	7	3	5	1	0	2	5	3	2	0	0	0	2	0	2	0	0	0	0
GC0	35	+ve	E0	75	12.5	12.5	0	0.125	8	6	1	1	0	1	1832	810	2854	0	365	365	0	170	170	0	811	811	0	33	13	5	15	12	3	0	0	0	18	2	2	0	0	0	9	0	1	0	0	0	4
GC1	34	WT	E0	25	0	75	0	0.75	8	2	0	6	0	1	874.333	0	874.333	0	300	300	0	135.833	135.833	0	262.667	262.667	0	28	12	15	1	10	11	1	0	0	6	6	5	0	0	0	1	4	6	1	0	0	4
GC2	33	+ve	E0	12.5	0	75	12.5	0.75	8	1	0	6	1	0.857143	1084.14	0	1115	899	300.714	58.5	1754	4058.29	4157.5	3463	51.7143	52.3333	48	18	7	8	3	9	7	1	0	0	1	7	0	0	0	0	0	0	6	1	0	0	1
GC3	28	+ve	E0	0	0	100	0	1	8	0	0	8	0	1	569.625	0	569.625	0	55.25	55.25	0	82.125	82.125	0	931.625	931.625	0	33	10	23	0	8	10	14	1	0	0	8	2	0	0	0	0	0	8	14	1	0	0
GE0	28	+ve	E0	0	0	87.5	12.5	0.875	8	0	0	7	1	0.875	582.5	0	471.143	1362	317.375	342.857	139	160.125	105	546	151.5	150.429	159	25	9	13	3	9	9	2	0	0	5	8	1	0	0	0	0	0	7	2	0	0	4
GE1	28	+ve	E0	0	0	100	0	1	8	0	0	8	0	1	498.5	0	498.5	0	136.25	136.25	0	49.875	49.875	0	521.125	521.125	0	23	10	13	0	10	10	3	0	0	0	8	2	0	0	0	0	2	8	3	0	0	0
GE2	33	WT	E0	50	0	25	25	0.25	8	4	0	2	2	0.5	1988	0	2460.5	1515.5	144.25	38	250.5	957.25	812.5	1102	23	36	10	21	7	5	9	9	4	1	0	6	1	4	0	1	0	2	0	1	2	0	0	1	1
GE3	28	+ve	E0	25	0	75	0	0.75	8	2	0	6	0	1	891.167	0	891.167	0	141	141	0	489.5	489.5	0	582.5	582.5	0	16	7	9	0	7	7	2	0	0	0	6	1	0	0	0	0	1	6	2	0	0	0
GK1	36	WT	E0	50	12.5	25	12.5	0.25	8	4	1	2	1	0.666667	1622.75	2961	1009	1512	727.333	141.5	1899	310.667	371.5	189	547	684.5	272	26	9	9	8	10	7	1	0	0	8	4	4	0	0	0	1	3	2	1	0	0	3
GK2	26	WT	E0	12.5	0	62.5	25	0.625	8	1	0	5	2	0.714286	227.857	0	129.8	473	114.857	114	117	190.143	205.2	152.5	38.2857	29	61.5	62	23	23	16	16	11	4	0	7	24	7	4	0	0	1	11	5	5	4	0	5	4
GK3	34	+ve	E0	50	0	25	25	0.25	8	4	0	2	2	0.5	1592.25	0	1751.5	1433	145.25	49.5	241	5707	1896	9518	325.25	450.5	200	11	4	4	3	6	4	0	0	1	0	4	0	0	0	0	0	1	2	0	0	1	0
GK4	28	+ve	E0	0	0	100	0	1	8	0	0	8	0	1	197.75	0	197.75	0	166	166	0	151.625	151.625	0	835	835	0	72	28	44	0	10	28	29	4	1	0	8	20	0	0	0	0	2	8	29	4	1	0
GA0	33	WT	E0	0	0	87.5	12.5	0.875	8	0	0	7	1	0.875	1351.88	0	1502.14	300	332.875	366.714	96	145.625	158.429	56	205.5	200.429	241	24	13	10	1	10	13	1	0	0	0	8	5	0	0	0	0	2	7	1	0	0	0
GA1	28	WT	E0	0	0	87.5	12.5	0.875	8	0	0	7	1	0.875	170.875	0	186	65	76.125	81.1429	41	49.625	43.8571	90	828.75	912	246	24	10	13	1	13	9	1	0	0	1	8	1	0	0	0	1	5	7	1	0	0	0
GA2	28	+ve	E0	0	0	100	0	1	8	0	0	8	0	1	1198.88	0	1198.88	0	278.125	278.125	0	1351.25	1351.25	0	20.625	20.625	0	22	12	10	0	9	12	1	0	0	0	8	4	0	0	0	0	1	8	1	0	0	0
GJ1	36	+ve	E0	87.5	0	0	12.5	0	8	7	0	0	1	0	3127	0	0	3127	839	0	839	169	0	169	263	0	263	6	1	3	2	3	1	1	0	0	1	1	0	0	0	0	0	2	0	0	0	0	1
GJ2	33	+ve	E0	37.5	0	62.5	0	0.625	8	3	0	5	0	1	2249	0	2249	0	391.6	391.6	0	121.4	121.4	0	829	829	0	56	5	51	0	46	5	2	0	0	3	5	0	0	0	0	0	41	5	2	0	0	3
GJ3	33	WT	E0	0	0	100	0	1	8	0	0	8	0	1	278.625	0	278.625	0	124.875	124.875	0	169.25	169.25	0	102.75	102.75	0	21	8	13	0	11	8	1	0	0	1	8	0	0	0	0	0	3	8	1	0	0	1
GG1	33	+ve	E0	87.5	12.5	0	0	0	8	7	1	0	0	0	3667	3667	0	0	0	0	0	0	0	0	0	0	0	7	3	2	2	4	2	0	0	0	1	1	2	0	0	0	0	2	0	0	0	0	0
GG2	28	+ve	E0	37.5	37.5	25	0	0.25	8	3	3	2	0	1	1941.4	2498	1106.5	0	340	340	0	864	864	0	310.5	310.5	0	11	8	3	0	6	4	0	0	0	1	5	2	0	0	0	1	1	2	0	0	0	0
WT	11		Mean	32.9545	1.13636	51.1364	14.7727	0.511364	8	2.63636	0.0909091	4.09091	1.18182	0.693723	1113.44	269.182	910.332	927.045	345.635	216.862	515	878.718	579.324	1362.45	297.996	347.94	112.136	23.8182	9.54545	9.18182	5.09091	8.90909	7.18182	1.36364	0	1.36364	5	5.36364	1.90909	0.272727	0	0.272727	1.72727	2.27273	4.09091	0.909091	0	0.545455	1.36364
Grb10	12		Mean	31.7308	4.80769	58.6538	4.80769	0.586538	8	2.53846	0.384615	4.69231	0.384615	0.787088	1494.71	536.538	992.543	524.692	267.351	178.776	228.692	1028.78	726.021	1053.54	433.295	422.664	51.5385	25.6154	9	14.4615	2.15385	10.6923	7.84615	4.23077	0.384615	0.153846	2.30769	5.46154	2.76923	0	0	0	0.769231	4.07692	4.69231	4.15385	0.384615	0.153846	1
			SE	8.47334	1.13636	10.0361	2.82952	0.100361	0	0.677867	0.0909091	0.802887	0.226362	0.0839624	218.023	269.182	230.478	308.788	99.0254	64.8852	219.935	383.804	323.846	902.395	78.8297	104.774	33.6324	4.29761	1.65345	1.96246	1.48602	1.20947	1.07719	0.337712	0	0.789392	2.07583	0.677867	0.653029	0.194978	0	0.194978	0.954329	0.57352	0.802887	0.342572	0	0.454545	0.491246
			SE	9.8398	3.13833	11.6354	2.34709	0.116354	0	0.787184	0.251066	0.930835	0.187767	0.108549	303.427	339.532	249.963	275.327	60.985	42.2063	148.556	515.202	342.845	783.874	97.8138	102.867	26.6436	5.59829	1.9329	4.5592	1.1776	3.14772	2.00294	2.39836	0.323575	0.108407	1.42588	0.787184	1.53276	0	0	0	0.718349	3.21122	0.930835	2.40903	0.323575	0.108407	0.456435
Forced - B1		F1		DNS	Omits	Left	Right	Inco	Trials	DNS	Omits	Left	Right	Inco
GB0	28	WT	E0	0	0	50	50	0.5	4	0	0	2	2	0	440.5	0	284.5	596.5	283.5	202.5	364.5	519.75	770	269.5	218.25	316.5	120	10	6	2	2	4	6	0	0	0	0	4	2	0	0	0	0	0	2	0	0	0	0
GB1	35	WT	E0	25	0	25	50	0.25	4	1	0	1	2	0	1383	0	598	1775.5	975.333	550	1188	78.6667	88	74	597	956	417.5	9	5	1	3	3	4	1	0	0	1	3	1	1	0	0	0	0	1	0	0	0	0
GF0	33	WT	E0	0	0	50	25	0.5	4	0	0	2	1	1	834	0	813.5	589	218.333	269	117	448.333	610.5	124	107.667	63.5	196	19	6	11	2	8	6	2	0	0	3	4	2	0	0	0	0	3	3	2	0	0	3
GF1	33	WT	E0	0	0	50	50	0.5	4	0	0	2	2	0	136.75	0	186	87.5	344.5	280.5	408.5	97.25	116.5	78	887	1296	478	26	12	11	3	5	7	1	0	0	13	4	3	0	0	0	5	1	2	0	0	0	8
GC0	35	+ve	E0	0	0	50	25	0.5	4	0	0	2	1	1	1698	0	541.5	3578	554.333	662	339	116.333	107	135	952.333	1111.5	634	23	10	9	4	11	8	0	0	0	4	4	4	0	0	0	2	5	3	0	0	0	1
GC1	34	WT	E0	0	0	50	25	0.5	4	0	0	2	1	1	483.5	0	318	1190	650.333	785	381	138	133.5	147	302.667	379	150	17	6	8	3	6	5	2	0	0	4	4	1	0	0	0	1	2	3	1	0	0	2
GC2	33	+ve	E0	0	0	50	50	0.5	4	0	0	2	2	0	115.75	0	64	167.5	102	34.5	169.5	435.25	722.5	148	414.75	453	376.5	35	15	15	5	4	5	1	0	0	25	4	1	0	0	0	10	0	2	1	0	0	12
GC3	28	+ve	E0	0	25	50	0	0.5	4	0	1	2	0	1	191.25	522	65	0	51.5	51.5	0	70.5	70.5	0	1317.5	1317.5	0	22	6	16	0	6	3	6	0	0	7	4	0	0	0	0	2	2	3	6	0	0	5
GE0	28	+ve	E0	0	0	50	50	0.5	4	0	0	2	2	0	177.25	0	266.5	88	217.5	248	187	103.75	85	122.5	203.5	191.5	215.5	21	7	11	3	5	5	3	0	0	8	4	1	1	0	0	1	1	2	2	0	0	6
GE1	28	+ve	E0	0	0	50	50	0.5	4	0	0	2	2	0	151.75	0	107.5	196	132.25	42.5	222	30.5	15	46	605	843	367	15	9	2	4	4	7	0	0	0	4	4	3	0	0	0	2	0	2	0	0	0	0
GE2	33	WT	E0	0	25	50	0	0.5	4	0	1	2	0	1	1332	921	1784.5	0	698.5	698.5	0	2059.5	2059.5	0	21.5	21.5	0	19	6	9	4	11	3	2	0	0	3	4	0	0	0	0	2	3	3	2	0	0	1
GE3	28	+ve	E0	0	0	50	25	0.5	4	0	0	2	1	1	197	0	244	72	126.667	132.5	115	1338.33	1996	23	552.667	659	340	13	6	6	1	4	5	1	0	0	3	4	1	0	0	0	1	0	3	1	0	0	2
GK1	36	WT	E0	0	0	25	50	0.25	4	0	0	1	2	1	629.25	0	982	197	264.333	261	266	98.3333	71	112	696.333	1258	415.5	18	6	1	11	4	4	2	0	0	8	4	0	0	0	0	2	0	1	0	0	0	0
GK2	26	WT	E0	0	0	50	50	0.5	4	0	0	2	2	0	396.5	0	471	322	231.5	63.5	399.5	244	332.5	155.5	16.75	12	21.5	26	11	7	8	4	4	2	0	1	15	4	0	0	0	0	7	0	2	0	0	0	5
GK3	34	+ve	E0	0	0	50	25	0.5	4	0	0	2	1	1	113	0	175	44	86.3333	53.5	152	318.333	376	203	648	811.5	321	18	8	8	2	5	5	1	0	0	7	4	1	1	0	0	2	1	3	0	0	0	4
GK4	28	+ve	E0	0	0	50	0	0.5	4	0	0	2	0	2	151.75	0	241	0	107	107	0	109	109	0	869	869	0	67	28	39	0	16	13	3	1	0	34	4	9	2	0	0	13	12	4	1	1	0	21
GA0	33	WT	E0	0	0	50	25	0.5	4	0	0	2	1	1	178.25	0	263	88	132	166	64	98	76.5	141	359	379.5	318	33	17	14	2	5	8	1	0	0	19	4	4	1	0	0	8	1	3	0	0	0	10
GA1	28	WT	E0	0	0	50	25	0.5	4	0	0	2	1	1	198.5	0	181	134	56.3333	48	73	67.3333	61.5	79	677	863.5	304	18	8	9	1	4	5	0	0	0	9	4	1	0	0	0	3	0	3	0	0	0	6
GA2	28	+ve	E0	0	0	50	50	0.5	4	0	0	2	2	0	312.5	0	290.5	334.5	303	152	454	1250	1682	818	42.75	61.5	24	21	9	7	5	4	4	1	0	0	12	4	0	0	0	0	5	0	2	0	0	0	5
GJ1	36	+ve	E0	0	0	50	50	0.5	4	0	0	2	2	0	288.5	0	324.5	252.5	902.75	1320	485.5	56.75	50.5	63	685	909	461	12	6	3	3	5	6	0	0	0	1	4	2	0	0	0	0	1	2	0	0	0	0
GJ2	33	+ve	E0	25	25	50	0	0.5	4	1	1	2	0	0	2337.33	3684	1664	0	64	64	0	233.5	233.5	0	1077	1077	0	12	3	7	2	10	2	0	0	0	0	3	0	0	0	0	0	5	2	0	0	0	0
GJ3	33	WT	E0	0	0	50	0	0.5	4	0	0	2	0	2	528.25	0	764	0	44	44	0	141.5	141.5	0	95.5	95.5	0	15	7	7	1	5	4	0	0	0	6	4	0	0	0	0	3	1	4	0	0	0	2
GG1	33	+ve	E0	0	0	50	50	0.5	4	0	0	2	2	0	998.25	0	99.5	1897	990.75	961.5	1020	186.25	117	255.5	580	855	305	17	8	5	4	4	5	2	0	0	6	4	1	1	0	0	2	0	2	1	0	0	2
GG2	28	+ve	E0	0	0	50	0	0.5	4	0	0	2	0	2	196.25	0	153.5	0	62.5	62.5	0	95.5	95.5	0	899	899	0	20	6	14	0	4	5	1	0	0	10	4	1	0	0	0	1	0	4	1	0	0	9
WT	11		Mean	2.27273	2.27273	45.4545	31.8182	0.454545	4	0.0909091	0.0909091	1.81818	1.27273	0.727273	594.591	83.7273	604.136	452.682	354.424	306.182	296.5	362.788	405.545	107.273	361.697	512.818	220.045	19.0909	8.18182	7.27273	3.63636	5.36364	5.09091	1.18182	0	0.0909091	7.36364	3.90909	1.27273	0.181818	0	0	2.81818	1	2.45455	0.454545	0	0	3.36364
Grb10	12		Mean	1.92308	3.84615	50	28.8462	0.5	4	0.0769231	0.153846	2	1.15385	0.615385	532.968	323.538	325.885	509.962	284.66	299.346	241.846	334.154	435.346	139.538	680.5	773.654	234.154	22.7692	9.30769	10.9231	2.53846	6.30769	5.61538	1.46154	0.0769231	0	9.30769	3.92308	1.84615	0.384615	0	0	3.15385	2.07692	2.61538	1	0.0769231	0	5.15385
			SE	2.27273	2.27273	3.04918	5.92655	0.0304918	0	0.0909091	0.0909091	0.121967	0.237062	0.194978	129.455	83.7273	143.89	170.373	89.0887	78.126	101.921	175.887	180.464	22.8512	92.2887	148.646	53.2685	2.12541	1.11043	1.30099	0.936849	0.691148	0.45636	0.26348	0	0.0909091	1.84525	0.0909091	0.406558	0.121967	0	0	0.84011	0.356753	0.281672	0.247299	0	0	1.03812
			SE	2.0016	2.71018	0	6.48593	0	0	0.0800641	0.108407	0	0.259437	0.221687	204.948	294.434	122.014	303.646	93.6538	119.906	82.7519	127.38	188.715	63.6963	100.631	102.738	61.0576	4.21992	1.81577	2.74485	0.535093	1.07616	0.777625	0.494629	0.0800641	0	2.81214	0.0800641	0.705594	0.187767	0	0	1.14167	1.0032	0.221687	0.471405	0.0800641	0	1.73143
Forced - B2		F2		DNS	Omits	Left	Right	Inco	Trials	DNS	Omits	Left	Right	Inco
GB0	28	WT	E0	0	0	25	25	0.25	4	0	0	1	1	2	463.75	0	415	989	43.5	33	54	1853	3619	87	296	235	357	21	14	3	4	4	6	1	0	0	10	4	2	1	0	0	7	0	2	0	0	0	1
GB1	35	WT	E0	100	0	0	0	0	4	4	0	0	0	0	0	0	0	0	0	0	0	0	0	0	0	0	0	4	0	3	1	3	0	0	0	0	1	0	0	0	0	0	0	3	0	0	0	0	0
GF0	33	WT	E0	50	25	0	25	0	4	2	1	0	1	0	1318	1412	0	1224	176	0	176	142	0	142	303	0	303	5	2	0	3	3	1	1	0	0	0	2	0	0	0	0	0	0	0	0	0	0	0
GF1	33	WT	E0	0	0	50	50	0.5	4	0	0	2	2	0	423.75	0	168	679.5	458.5	275.5	641.5	82	86	78	708	1056	360	13	5	4	4	4	4	2	0	0	3	4	0	0	0	0	1	0	2	1	0	0	1
GC0	35	+ve	E0	0	0	50	25	0.5	4	0	0	2	1	1	1519.75	0	1569	2629	525.667	625.5	326	186.667	107.5	345	877.667	1049	535	21	12	5	4	6	7	1	0	0	7	4	3	1	0	0	4	1	3	0	0	0	1
GC1	34	WT	E0	0	0	50	50	0.5	4	0	0	2	2	0	948.25	0	582.5	1314	322.25	99	545.5	147.75	126.5	169	132.75	69	196.5	26	11	5	10	6	10	1	1	0	8	4	6	0	0	0	1	2	2	0	0	0	1
GC2	33	+ve	E0	0	0	50	25	0.5	4	0	0	2	1	1	1810	0	1927	1000	306.667	204.5	511	620.333	837.5	186	321	302	359	11	5	3	3	4	5	2	0	0	0	4	1	0	0	0	0	0	3	0	0	0	0
GC3	28	+ve	E0	0	0	50	0	0.5	4	0	0	2	0	2	277.25	0	217	0	44.5	44.5	0	83	83	0	1036	1036	0	25	6	19	0	11	5	4	1	0	4	4	1	0	0	0	1	7	4	4	1	0	3
GE0	28	+ve	E0	0	0	50	50	0.5	4	0	0	2	2	0	299.75	0	203.5	396	290.5	344.5	236.5	91	61	121	151	107.5	194.5	12	4	5	3	4	4	4	0	0	0	4	0	0	0	0	0	0	2	3	0	0	0
GE1	28	+ve	E0	0	0	50	25	0.5	4	0	0	2	1	1	129	0	111.5	105	134.333	55	293	252.667	369	20	433.333	512	276	12	7	4	1	4	5	0	0	0	3	4	1	0	0	0	2	0	3	0	0	0	1
GE2	33	WT	E0	0	0	50	0	0.5	4	0	0	2	0	2	1016.75	0	578.5	0	49.5	49.5	0	1309	1309	0	33.5	33.5	0	18	7	10	1	9	4	0	0	0	5	4	0	0	0	0	3	4	4	0	0	0	2
GE3	28	+ve	E0	0	0	50	0	0.5	4	0	0	2	0	2	180.25	0	112.5	0	46	46	0	2230.5	2230.5	0	43	43	0	17	8	9	0	5	7	0	0	0	5	4	3	0	0	0	1	1	4	0	0	0	4
GK1	36	WT	E0	25	0	25	25	0.25	4	1	0	1	1	1	816.333	0	321	335	731.5	552	911	77	79	75	674	994	354	14	7	5	2	6	3	0	0	0	5	3	0	0	0	0	4	2	2	0	0	0	1
GK2	26	WT	E0	0	0	50	50	0.5	4	0	0	2	2	0	594.75	0	306.5	883	109.5	132	87	219.5	313.5	125.5	40	54.5	25.5	26	12	7	7	6	5	2	0	4	9	4	1	0	0	3	4	2	2	1	0	1	1
GK3	34	+ve	E0	0	0	50	25	0.5	4	0	0	2	1	1	218	0	322	227	101.333	57	190	76.3333	74	81	683.333	885	280	20	6	10	4	4	5	1	0	0	10	4	1	0	0	0	1	0	3	0	0	0	7
GK4	28	+ve	E0	0	0	50	0	0.5	4	0	0	2	0	2	225.25	0	64	0	45.5	45.5	0	94.5	94.5	0	524.5	524.5	0	64	23	41	0	4	11	9	0	0	40	4	7	0	0	0	12	0	4	9	0	0	28
GA0	33	WT	E0	0	0	50	0	0.5	4	0	0	2	0	2	187.5	0	172.5	0	38.5	38.5	0	66	66	0	307.5	307.5	0	28	11	16	1	5	4	0	0	0	19	4	0	0	0	0	7	0	4	0	0	0	12
GA1	28	WT	E0	0	0	50	25	0.5	4	0	0	2	1	1	181	0	135	411	258.667	57.5	661	80	72	96	633.667	814	273	26	15	7	4	7	7	0	0	0	12	4	3	0	0	0	8	0	3	0	0	0	4
GA2	28	+ve	E0	0	0	50	25	0.5	4	0	0	2	1	1	507.75	0	162.5	994	140.667	58.5	305	273.667	64.5	692	57	66.5	38	12	4	7	1	6	4	0	0	0	2	4	0	0	0	0	0	2	3	0	0	0	2
GJ1	36	+ve	E0	100	0	0	0	0	4	4	0	0	0	0	0	0	0	0	0	0	0	0	0	0	0	0	0	1	0	1	0	0	0	0	0	0	1	0	0	0	0	0	0	0	0	0	0	0	1
GJ2	33	+ve	E0	25	0	25	25	0.25	4	1	0	1	1	1	574.667	0	260	1060	276	62	490	208	137	279	544.5	783	306	16	9	5	2	3	7	1	0	0	5	3	4	0	0	0	2	0	2	0	0	0	3
GJ3	33	WT	E0	0	0	50	0	0.5	4	0	0	2	0	2	124	0	90	0	82	82	0	133.5	133.5	0	76.5	76.5	0	20	9	10	1	4	6	0	0	0	10	4	2	0	0	0	3	0	4	0	0	0	6
GG1	33	+ve	E0	50	0	50	0	0.5	4	2	0	2	0	0	1066	0	1066	0	90	90	0	266.5	266.5	0	468	468	0	8	5	3	0	2	3	1	0	0	2	2	1	0	0	0	2	0	2	1	0	0	0
GG2	28	+ve	E0	0	0	50	0	0.5	4	0	0	2	0	2	798.5	0	937.5	0	136.5	136.5	0	104.5	104.5	0	1108	1108	0	23	10	13	0	5	9	0	0	0	9	4	5	0	0	0	1	1	4	0	0	0	8
WT	11		Mean	15.9091	2.27273	36.3636	22.7273	0.363636	4	0.636364	0.0909091	1.45455	0.909091	0.909091	552.189	128.364	251.727	530.5	206.356	119.909	279.636	373.614	527.682	70.2273	291.356	330.909	169.909	18.2727	8.45455	6.36364	3.45455	5.18182	4.54545	0.636364	0.0909091	0.363636	7.45455	3.36364	1.27273	0.0909091	0	0.272727	3.45455	1.18182	2.27273	0.181818	0	0.0909091	2.63636
Grb10	12		Mean	13.4615	0	44.2308	15.3846	0.442308	4	0.538462	0	1.76923	0.615385	1.07692	585.09	0	534.808	493.154	164.436	136.115	180.885	345.205	340.731	132.615	480.564	529.577	152.962	18.6154	7.61538	9.61538	1.38462	4.46154	5.53846	1.76923	0.0769231	0	6.76923	3.46154	2.07692	0.0769231	0	0	2	0.923077	2.84615	1.30769	0.0769231	0	4.46154
			SE	9.69579	2.27273	6.18249	6.26548	0.0618249	0	0.387831	0.0909091	0.247299	0.250619	0.28459	128.42	128.364	62.5554	154.617	67.6335	49.0566	102.569	184.466	328.951	18.7613	81.0993	125.254	49.5806	2.54091	1.44199	1.32303	0.867217	0.552978	0.835177	0.243935	0.0909091	0.363636	1.64794	0.387831	0.57352	0.0909091	0	0.272727	0.867217	0.443502	0.428335	0.121967	0	0.0909091	1.08102
			SE	8.64791	0	4.32395	4.69417	0.0432395	0	0.345916	0	0.172958	0.187767	0.219265	162.694	0	182.336	221.752	42.5267	49.8145	56.091	169.548	175.691	59.1196	106.89	118.354	52.601	4.3693	1.5966	3.06082	0.464556	0.732342	0.795957	0.746788	0.0800641	0	3.02571	0.345916	0.628728	0.0800641	0	0	0.927961	0.558539	0.330113	0.767252	0.0800641	0	2.17184
Forced - B3		F3		DNS	Omits	Left	Right	Inco	Trials	DNS	Omits	Left	Right	Inco
GB0	28	WT	E0	0	0	50	0	0.5	4	0	0	2	0	2	1161.5	0	638	0	424.5	424.5	0	972.5	972.5	0	231.5	231.5	0	17	10	7	0	6	10	1	0	0	0	4	6	0	0	0	0	2	4	1	0	0	0
GB1	35	WT	E0	25	25	0	50	0	4	1	1	0	2	0	1023	1224	0	922.5	153	0	153	9962.5	0	9962.5	15	0	15	9	3	0	6	4	2	3	0	0	0	3	0	0	0	0	0	0	0	0	0	0	0
GF0	33	WT	E0	50	0	50	0	0.5	4	2	0	2	0	0	2162	0	2162	0	177.5	177.5	0	7825.5	7825.5	0	31	31	0	10	4	6	0	4	4	0	0	0	2	2	2	0	0	0	0	2	2	0	0	0	2
GF1	33	WT	E0	100	0	0	0	0	4	4	0	0	0	0	0	0	0	0	0	0	0	0	0	0	0	0	0	5	2	2	1	0	0	0	0	0	5	0	0	0	0	0	2	0	0	0	0	0	2
GC0	35	+ve	E0	25	25	0	0	0	4	1	1	0	0	2	1563.67	1145	0	0	0	0	0	0	0	0	0	0	0	11	5	2	4	4	4	0	0	0	3	3	2	0	0	0	0	0	1	0	0	0	1
GC1	34	WT	E0	0	0	50	25	0.5	4	0	0	2	1	1	501.5	0	468.5	905	272.667	313.5	191	116.667	115	120	133.333	123	154	17	9	7	1	4	4	1	0	0	8	4	0	0	0	0	5	0	3	1	0	0	3
GC2	33	+ve	E0	25	0	25	50	0.25	4	1	0	1	2	0	3398.33	0	2633	3781	592.333	89	844	353.667	729	166	301.333	182	361	9	4	1	4	5	4	0	0	0	0	3	1	0	0	0	0	0	1	0	0	0	0
GC3	28	+ve	E0	0	50	50	0	0.5	4	0	2	2	0	0	236.75	387	86.5	0	53.5	53.5	0	77.5	77.5	0	1108.5	1108.5	0	21	13	8	0	4	7	5	0	0	5	4	5	0	0	0	4	0	2	5	0	0	1
GE0	28	+ve	E0	0	0	50	0	0.5	4	0	0	2	0	2	625	0	891	0	45.5	45.5	0	256.5	256.5	0	34.5	34.5	0	23	8	15	0	4	4	0	0	0	15	4	0	0	0	0	4	0	4	0	0	0	11
GE1	28	+ve	E0	0	0	50	25	0.5	4	0	0	2	1	1	85.5	0	80	46	195.333	190.5	205	23	16	37	446.333	569	201	15	10	4	1	5	7	0	0	0	3	4	3	0	0	0	3	1	3	0	0	0	0
GE2	33	WT	E0	25	0	25	25	0.25	4	1	0	1	1	1	1795.67	0	880	2002	123.5	39	208	1499.5	1784	1215	3.5	2	5	9	3	3	3	6	3	0	0	0	0	3	0	0	0	0	0	1	2	0	0	0	0
GE3	28	+ve	E0	0	0	50	25	0.5	4	0	0	2	1	1	291.75	0	469	139	79	71	95	1044.33	1356	421	11.6667	11.5	12	9	5	3	1	4	5	0	0	0	0	4	1	0	0	0	0	0	3	0	0	0	0
GK1	36	WT	E0	50	25	0	0	0	4	2	1	0	0	1	1719	1413	0	0	0	0	0	0	0	0	0	0	0	7	5	0	2	3	3	0	0	0	1	2	2	0	0	0	1	0	0	0	0	0	0
GK2	26	WT	E0	0	0	50	50	0.5	4	0	0	2	2	0	181.75	0	48	315.5	234.75	142.5	327	257.25	323	191.5	15	13	17	28	13	9	6	5	8	3	0	0	12	4	4	0	0	0	5	1	2	3	0	0	3
GK3	34	+ve	E0	25	0	0	25	0	4	1	0	0	1	2	349.667	0	0	66	56	0	56	210	0	210	293	0	293	10	5	2	3	3	5	1	0	0	1	3	2	0	0	0	0	0	1	0	0	0	1
GK4	28	+ve	E0	0	0	50	0	0.5	4	0	0	2	0	2	98.5	0	178.5	0	242	242	0	93.5	93.5	0	822.5	822.5	0	70	34	36	0	4	24	7	3	0	32	4	20	0	0	0	10	0	4	7	3	0	22
GA0	33	WT	E0	0	0	50	25	0.5	4	0	0	2	1	1	269.25	0	257	414	390.333	216	739	70.3333	67	77	165.667	103.5	290	20	5	12	3	6	5	1	0	3	5	4	1	0	0	0	0	2	3	0	0	3	4
GA1	28	WT	E0	0	0	50	50	0.5	4	0	0	2	2	0	155.5	0	135.5	175.5	66.75	51.5	82	63	49	77	469.75	669.5	270	12	7	2	3	4	5	1	0	0	2	4	1	0	0	0	2	0	2	0	0	0	0
GA2	28	+ve	E0	0	0	50	25	0.5	4	0	0	2	1	1	219	0	225.5	205	416.667	291	668	1803.33	2421.5	567	14.3333	17.5	8	21	10	7	4	4	6	1	0	4	6	4	2	0	0	1	3	0	3	1	0	3	0
GJ1	36	+ve	E0	100	0	0	0	0	4	4	0	0	0	0	0	0	0	0	0	0	0	0	0	0	0	0	0	3	0	3	0	3	0	0	0	0	0	0	0	0	0	0	0	3	0	0	0	0	0
GJ2	33	+ve	E0	25	0	0	25	0	4	1	0	0	1	2	582	0	0	419	85	0	85	401	0	401	261	0	261	28	6	19	3	17	4	0	0	0	7	3	1	0	0	0	2	14	1	0	0	0	4
GJ3	33	WT	E0	0	0	50	0	0.5	4	0	0	2	0	2	192	0	216.5	0	48.5	48.5	0	292.5	292.5	0	35.5	35.5	0	16	8	8	0	5	6	0	0	0	5	4	2	0	0	0	2	1	4	0	0	0	3
GG1	33	+ve	E0	50	0	25	25	0.25	4	2	0	1	1	0	1677.5	0	2251	1104	192.5	274	111	2852	177	5527	430	612	248	10	2	5	3	5	2	0	0	2	1	2	0	0	0	0	0	3	1	0	0	0	1
GG2	28	+ve	E0	100	0	0	0	0	4	4	0	0	0	0	0	0	0	0	0	0	0	0	0	0	0	0	0	0	0	0	0	0	0	0	0	0	0	0	0	0	0	0	0	0	0	0	0	0	0
WT	11		Mean	22.7273	4.54545	34.0909	20.4545	0.340909	4	0.909091	0.181818	1.36364	0.818182	0.727273	832.833	239.727	436.864	430.409	171.955	128.455	154.545	1914.52	1038.95	1058.45	100.023	109.909	68.2727	13.6364	6.27273	5.09091	2.27273	4.27273	4.54545	0.909091	0	0.272727	3.63636	3.09091	1.63636	0	0	0	1.54545	0.818182	2	0.454545	0	0.272727	1.54545
Grb10	12		Mean	26.9231	5.76923	26.9231	15.3846	0.269231	4	1.07692	0.230769	1.07692	0.615385	1	702.128	117.846	524.192	443.077	150.603	96.6538	158.769	547.295	394.385	563.769	286.397	258.269	106.462	17.6923	7.84615	8.07692	1.76923	4.76923	5.53846	1.07692	0.230769	0.461538	5.61538	2.92308	2.84615	0	0	0.0769231	2	1.61538	1.84615	1	0.230769	0.230769	3.15385
			SE	9.80175	3.04918	6.96805	6.58699	0.0696805	0	0.39207	0.121967	0.278722	0.26348	0.237062	234.28	161.318	193.283	189.305	44.0803	42.8497	67.4335	1059.76	698.721	896.797	43.9125	60.0892	34.3752	2.02831	1.03652	1.1867	0.661828	0.523813	0.835177	0.342572	0	0.272727	1.15422	0.39207	0.576395	0	0	0	0.577827	0.26348	0.447214	0.281672	0	0.272727	0.474124
			SE	10.4006	4.32395	6.88543	4.69417	0.0688543	0	0.416025	0.172958	0.275417	0.187767	0.263523	282.064	94.2902	257.364	302.834	51.7019	32.3887	79.2584	249.912	209.562	434.201	101.015	110.905	40.7449	5.09818	2.5272	2.90465	0.502132	1.12518	1.72649	0.650444	0.240192	0.345916	2.59417	0.416025	1.54491	0	0	0.0800641	0.841625	1.12137	0.405623	0.656167	0.240192	0.240192	1.85535
Choice Total		CT		DNS	Omits	Left	Right	All Bias
GB0	28	WT	E0	8.33333	0	83.3333	8.33333	0.833333	24	2	0	20	2	0.909091	769.364	0	793.9	524	193.5	177.55	353	1249.77	1353.25	215	133.045	123.4	229.5	110	44	40	26	37	28	7	0	3	35	22	6	2	0	0	14	14	20	4	0	0	2
GB1	35	WT	E0	45.8333	8.33333	33.3333	12.5	0.333333	24	11	2	8	3	0.727273	1629	1207	1694.62	1735.33	814.455	701.25	1116.33	995.455	81.375	3433	726.909	905.875	249.667	35	20	11	4	14	16	3	0	0	2	13	5	2	0	0	0	0	8	1	0	0	2
GF0	33	WT	E0	66.6667	0	12.5	20.8333	0.125	24	16	0	3	5	0.375	1305.12	0	1616	1118.6	223.625	298.333	178.8	490.75	816	295.6	111	71.6667	134.6	34	11	13	10	19	9	2	0	0	4	8	1	1	0	0	1	7	3	1	0	0	2
GF1	33	WT	E0	37.5	8.33333	45.8333	8.33333	0.458333	24	9	2	11	2	0.846154	739.867	1382.5	684	404.5	223.077	170.909	510	1189.92	1144.18	1441.5	895.231	1014.45	239.5	53	28	13	12	17	16	1	0	2	17	15	3	0	0	0	10	1	11	0	0	0	1
GC0	35	+ve	E0	33.3333	8.33333	20.8333	37.5	0.208333	24	8	2	5	9	0.357143	1583.38	1503.5	2183.4	1267.78	573.857	281.2	736.444	138.643	108.2	155.556	655.786	1038.2	443.333	140	53	36	51	52	24	7	0	0	57	16	10	4	0	0	23	14	5	0	0	0	17
GC1	34	WT	E0	8.33333	4.16667	62.5	25	0.625	24	2	1	15	6	0.714286	768.5	1788	718.933	722.5	306.333	256.467	431	129.429	118.667	156.333	261.81	288.267	195.667	119	53	53	13	31	45	12	0	0	31	22	24	4	0	0	3	9	15	5	0	0	24
GC2	33	+ve	E0	20.8333	0	75	4.16667	0.75	24	5	0	18	1	0.947368	898.105	0	898.056	899	168.895	80.8333	1754	1861.58	1772.61	3463	393.737	412.944	48	50	22	23	5	21	22	2	0	0	5	19	3	0	0	0	0	0	18	2	0	0	3
GC3	28	+ve	E0	0	0	100	0	1	24	0	0	24	0	1	397.375	0	397.375	0	47.9167	47.9167	0	80.5	80.5	0	1021.12	1021.12	0	114	29	85	0	34	28	48	3	0	1	24	4	0	0	0	1	10	24	48	3	0	0
GE0	28	+ve	E0	0	0	87.5	12.5	0.875	24	0	0	21	3	0.875	442.125	0	425.762	556.667	228.125	222.429	268	127.833	110	252.667	195.833	194.762	203.333	91	33	44	14	26	27	9	1	3	25	24	3	0	0	2	4	1	21	8	0	0	14
GE1	28	+ve	E0	0	0	100	0	1	24	0	0	24	0	1	267.5	0	267.5	0	103.25	103.25	0	96.2083	96.2083	0	567.833	567.833	0	77	33	40	4	29	30	5	0	0	13	24	6	0	0	0	3	5	24	5	0	0	6
GE2	33	WT	E0	20.8333	0	62.5	16.6667	0.625	24	5	0	15	4	0.789474	1352.21	0	1294.4	1569	145.895	82.4667	383.75	1152.89	1274.33	697.5	24.4737	26.0667	18.5	85	30	38	17	47	24	3	0	6	5	19	5	3	0	2	1	18	15	0	0	1	4
GE3	28	+ve	E0	8.33333	0	87.5	4.16667	0.875	24	2	0	21	1	0.954545	453.273	0	374.238	2113	122.409	118.429	206	887.5	926.095	77	405.409	410.095	307	72	30	41	1	28	26	3	2	3	10	22	4	1	1	1	1	6	21	2	1	2	9
GK1	36	WT	E0	50	4.16667	29.1667	16.6667	0.291667	24	12	1	7	4	0.636364	751.833	2961	533.429	581.75	423.273	171.714	863.5	147	151.429	139.25	706.364	876.571	408.5	102	30	27	45	23	20	9	0	0	50	12	9	0	0	0	9	3	7	5	0	0	12
GK2	26	WT	E0	4.16667	0	54.1667	41.6667	0.541667	24	1	0	13	10	0.565217	376.783	0	210.769	592.6	154.913	99.2308	227.3	264.174	337.231	169.2	35.8261	28.6154	45.2	195	72	77	46	36	41	17	3	17	81	23	18	3	0	3	25	8	13	11	3	8	34
GK3	34	+ve	E0	16.6667	0	75	8.33333	0.75	24	4	0	18	2	0.9	604.15	0	512.056	1433	89.95	73.1667	241	1356.7	449.889	9518	678.65	731.833	200	82	33	44	5	31	22	1	0	1	27	20	2	0	0	0	11	9	18	1	0	1	15
GK4	28	+ve	E0	0	0	100	0	1	24	0	0	24	0	1	150.583	0	150.583	0	179.875	179.875	0	138.292	138.292	0	851.958	851.958	0	358	144	214	0	46	91	66	23	4	128	24	67	6	0	0	47	22	24	60	23	4	81
GA0	33	WT	E0	0	0	95.8333	4.16667	0.958333	24	0	0	23	1	0.958333	672.125	0	688.304	300	250.875	257.609	96	102.542	104.565	56	182.583	180.043	241	114	50	59	5	40	30	2	0	15	27	24	6	0	0	7	13	16	23	2	0	7	11
GA1	28	WT	E0	0	0	83.3333	16.6667	0.833333	24	0	0	20	4	0.833333	257.708	0	205.8	517.25	64.4583	61.9	77.25	51.9167	46.2	80.5	745	840.05	269.75	83	37	40	6	31	30	3	0	0	19	24	6	1	0	0	6	7	20	2	0	0	11
GA2	28	+ve	E0	0	0	95.8333	4.16667	0.958333	24	0	0	23	1	0.958333	629.917	0	632.435	572	195.083	185.391	418	1205.12	1233.83	545	24.3333	24	32	80	37	40	3	27	28	3	0	0	22	24	4	1	0	0	8	3	23	2	0	0	12
GJ1	36	+ve	E0	58.3333	8.33333	16.6667	16.6667	0.166667	24	14	2	4	4	0.5	910.3	732	774	1135.75	589.125	866.25	312	83.625	80.5	86.75	657.25	956.5	358	28	12	9	7	15	9	1	0	0	3	10	1	0	0	0	1	4	4	0	0	0	1
GJ2	33	+ve	E0	20.8333	0	66.6667	12.5	0.666667	24	5	0	16	3	0.842105	1304.47	0	1415.25	713.667	249.105	269.875	138.333	179.632	170.562	228	736.526	829.375	241.333	146	32	108	6	85	26	9	0	0	26	19	7	1	0	0	5	64	16	8	0	0	20
GJ3	33	WT	E0	0	0	83.3333	16.6667	0.833333	24	0	0	20	4	0.833333	264.417	0	264.2	265.5	83.2917	85.65	71.5	160.417	158.65	169.25	83.25	88.2	58.5	100	35	57	8	40	25	6	0	9	20	24	1	2	0	3	5	15	20	4	0	6	12
GG1	33	+ve	E0	50	8.33333	41.6667	0	0.416667	24	12	2	10	0	1	1076.75	1867.5	918.6	0	128.4	128.4	0	182.4	182.4	0	655	655	0	63	21	28	14	20	15	1	0	0	27	12	5	0	0	0	4	3	10	1	0	0	14
GG2	28	+ve	E0	16.6667	12.5	70.8333	0	0.708333	24	4	3	17	0	1	852.8	2498	562.471	0	202.059	202.059	0	211.235	211.235	0	762.235	762.235	0	92	41	51	0	31	26	4	0	0	31	20	9	0	0	0	12	11	17	4	0	0	19
WT	11		Mean	21.9697	2.27273	58.7121	17.0455	0.587121	24	5.27273	0.545455	14.0909	4.09091	0.744351	807.903	667.136	791.305	757.367	262.154	214.825	391.676	539.479	507.807	623.012	355.045	403.928	190.035	93.6364	37.2727	38.9091	17.4545	30.4545	25.8182	5.90909	0.272727	4.72727	26.4545	18.7273	7.63636	1.63636	0	1.36364	7.90909	8.90909	14.0909	3.18182	0.272727	2	10.4545
Grb10	12		Mean	17.3077	2.88462	72.1154	7.69231	0.721154	24	4.15385	0.692308	17.3077	1.84615	0.871884	736.21	507.769	731.671	668.528	221.388	212.236	313.368	503.79	427.717	1102	585.052	650.451	141	107.154	40	58.6923	8.46154	34.2308	28.7692	12.2308	2.23077	0.846154	28.8462	19.8462	9.61538	1	0.0769231	0.230769	9.23077	11.6923	17.3077	10.8462	2.07692	0.538462	16.2308
			SE	7.21887	1.03041	8.01385	3.04918	0.0801385	0	1.73253	0.247299	1.92332	0.731804	0.0506798	135.878	308.027	159.566	150.533	63.0217	54.2115	101.174	150.286	159.239	306.367	101.708	123.37	35.0385	13.6663	5.08669	6.49959	4.58131	3.25957	3.23565	1.5103	0.272727	1.90259	6.98877	1.73253	2.15015	0.410603	0	0.677867	2.24602	1.86086	1.92332	0.961232	0.272727	0.98165	3.14603
			SE	5.65975	1.3344	8.35334	3.06053	0.0835334	0	1.35834	0.320256	2.0048	0.734527	0.0593375	120.745	252.379	158.38	196.496	48.9892	60.6162	139.588	175.48	156.312	778.389	77.9366	91.069	45.9029	23.7238	9.46338	15.3539	3.92926	5.26143	5.64967	5.88802	1.82252	0.422397	9.61902	1.35834	5.03397	0.540062	0.0800641	0.172958	3.75306	4.85682	2.0048	5.62589	1.83129	0.345916	5.93618
Forced Total		FT		DNS	Omits	Left	Right	Inco	Trials	DNS	Omits	Left	Right	Inco
GB0	28	WT	E0	0	0	41.6667	25	0.416667	12	0	0	5	3	4	688.583	0	452	727.333	258.75	257.4	261	966.25	1420.8	208.667	241	266.2	199	48	30	12	6	14	22	2	0	0	10	12	10	1	0	0	7	2	8	1	0	0	1
GB1	35	WT	E0	50	8.33333	8.33333	33.3333	0.0833333	12	6	1	1	4	0	1203	1224	598	1349	646.4	550	670.5	4032.2	88	5018.25	364.2	956	216.25	22	8	4	10	10	6	4	0	0	2	6	1	1	0	0	0	3	1	0	0	0	0
GF0	33	WT	E0	33.3333	8.33333	33.3333	16.6667	0.333333	12	4	1	4	2	1	1287	1412	1487.75	906.5	197.667	223.25	146.5	2856.33	4218	133	114.667	47.25	249.5	34	12	17	5	15	11	3	0	0	5	8	4	0	0	0	0	5	5	2	0	0	5
GF1	33	WT	E0	33.3333	0	33.3333	33.3333	0.333333	12	4	0	4	4	0	280.25	0	177	383.5	401.5	278	525	89.625	101.25	78	797.5	1176	419	44	19	17	8	9	11	3	0	0	21	8	3	0	0	0	8	1	4	1	0	0	11
GC0	35	+ve	E0	8.33333	8.33333	33.3333	16.6667	0.333333	12	1	1	4	2	4	1596.55	1145	1055.25	3103.5	540	643.75	332.5	151.5	107.25	240	915	1080.25	584.5	55	27	16	12	21	19	1	0	0	14	11	9	1	0	0	6	6	7	0	0	0	3
GC1	34	WT	E0	0	0	50	33.3333	0.5	12	0	0	6	4	2	644.417	0	456.333	1180.75	405.8	399.167	415.75	135.5	125	151.25	183.9	190.333	174.25	60	26	20	14	16	19	4	1	0	20	12	7	0	0	0	7	4	8	2	0	0	6
GC2	33	+ve	E0	8.33333	0	41.6667	41.6667	0.416667	12	1	0	5	5	1	1627.09	0	1323	1779.4	310.5	113.4	507.6	466.3	769.8	162.8	352.6	338.4	366.8	55	24	19	12	13	14	3	0	0	25	11	3	0	0	0	10	0	6	1	0	0	12
GC3	28	+ve	E0	0	25	50	0	0.5	12	0	3	6	0	3	235.083	432	122.833	0	49.8333	49.8333	0	77	77	0	1154	1154	0	68	25	43	0	21	15	15	1	0	16	12	6	0	0	0	7	9	9	15	1	0	9
GE0	28	+ve	E0	0	0	50	33.3333	0.5	12	0	0	6	4	2	367.333	0	453.667	242	212.3	212.667	211.75	129.2	134.167	121.75	148.7	111.167	205	56	19	31	6	13	13	7	0	0	23	12	1	1	0	0	5	1	8	5	0	0	17
GE1	28	+ve	E0	0	0	50	33.3333	0.5	12	0	0	6	4	2	122.083	0	99.6667	135.75	151.8	96	235.5	94.9	133.333	37.25	505.9	641.333	302.75	42	26	10	6	13	19	0	0	0	10	12	7	0	0	0	7	1	8	0	0	0	1
GE2	33	WT	E0	8.33333	8.33333	41.6667	8.33333	0.416667	12	1	1	5	1	4	1343.82	921	1121.2	2002	290.5	307	208	1622.67	1704.2	1215	19.5	22.4	5	46	16	22	8	26	10	2	0	0	8	11	0	0	0	0	5	8	9	2	0	0	3
GE3	28	+ve	E0	0	0	50	16.6667	0.5	12	0	0	6	2	4	223	0	275.167	105.5	88.625	83.1667	105	1451.12	1860.83	222	222.375	237.833	176	39	19	18	2	13	17	1	0	0	8	12	5	0	0	0	2	1	10	1	0	0	6
GK1	36	WT	E0	25	8.33333	16.6667	25	0.166667	12	3	1	2	3	3	933.778	1413	651.5	243	451.2	406.5	481	89.8	75	99.6667	687.4	1126	395	39	18	6	15	13	10	2	0	0	14	9	2	0	0	0	7	2	3	0	0	0	1
GK2	26	WT	E0	0	0	50	50	0.5	12	0	0	6	6	0	391	0	275.167	506.833	191.917	112.667	271.167	240.25	323	157.5	23.9167	26.5	21.3333	80	36	23	21	15	17	7	0	5	36	12	5	0	0	3	16	3	6	4	0	1	9
GK3	34	+ve	E0	8.33333	0	33.3333	25	0.333333	12	1	0	4	3	4	215.727	0	248.5	112.333	88.4286	55.25	132.667	199.143	225	164.667	612.429	848.25	298	48	19	20	9	12	15	3	0	0	18	11	4	1	0	0	3	1	7	0	0	0	12
GK4	28	+ve	E0	0	0	50	0	0.5	12	0	0	6	0	6	158.5	0	161.167	0	131.5	131.5	0	99	99	0	738.667	738.667	0	201	85	116	0	24	48	19	4	0	106	12	36	2	0	0	35	12	12	17	4	0	71
GA0	33	WT	E0	0	0	50	16.6667	0.5	12	0	0	6	2	4	211.667	0	230.833	251	205.5	140.167	401.5	79.625	69.8333	109	273.625	263.5	304	81	33	42	6	16	17	2	0	3	43	12	5	1	0	0	15	3	10	0	0	3	26
GA1	28	WT	E0	0	0	50	33.3333	0.5	12	0	0	6	4	2	178.333	0	150.5	224	121.2	52.3333	224.5	69.4	60.8333	82.25	581.1	782.333	279.25	56	30	18	8	15	17	1	0	0	23	12	5	0	0	0	13	0	8	0	0	0	10
GA2	28	+ve	E0	0	0	50	33.3333	0.5	12	0	0	6	4	2	346.417	0	226.167	467	288.4	167.167	470.25	1123.1	1389.33	723.75	38.5	48.5	23.5	54	23	21	10	14	14	2	0	4	20	12	2	0	0	1	8	2	8	1	0	3	7
GJ1	36	+ve	E0	66.6667	0	16.6667	16.6667	0.166667	12	8	0	2	2	0	288.5	0	324.5	252.5	902.75	1320	485.5	56.75	50.5	63	685	909	461	16	6	7	3	8	6	0	0	0	2	4	2	0	0	0	0	4	2	0	0	0	1
GJ2	33	+ve	E0	25	8.33333	25	16.6667	0.25	12	3	1	3	2	3	1164.67	3684	1196	739.5	153	63.3333	287.5	256.8	201.333	340	700.8	979	283.5	56	18	31	7	30	13	1	0	0	12	9	5	0	0	0	4	19	5	0	0	0	7
GJ3	33	WT	E0	0	0	50	0	0.5	12	0	0	6	0	6	281.417	0	356.833	0	58.1667	58.1667	0	189.167	189.167	0	69.1667	69.1667	0	51	24	25	2	14	16	0	0	0	21	12	4	0	0	0	8	2	12	0	0	0	11
GG1	33	+ve	E0	33.3333	0	41.6667	25	0.416667	12	4	0	5	3	0	1185	0	916.4	1632.67	566	475.4	717	872.75	188.8	2012.67	514.5	651.6	286	35	15	13	7	11	10	3	0	2	9	8	2	1	0	0	4	3	5	2	0	0	3
GG2	28	+ve	E0	33.3333	0	33.3333	0	0.333333	12	4	0	4	0	4	497.375	0	545.5	0	99.5	99.5	0	100	100	0	1003.5	1003.5	0	43	16	27	0	9	14	1	0	0	19	8	6	0	0	0	2	1	8	1	0	0	17
WT	11		Mean	13.6364	3.0303	38.6364	25	0.386364	12	1.63636	0.363636	4.63636	3	2.36364	676.66	451.818	541.556	706.72	293.509	253.15	327.72	942.802	761.371	659.326	305.089	447.789	205.689	51	22.9091	18.7273	9.36364	14.8182	14.1818	2.72727	0.0909091	0.727273	18.4545	10.3636	4.18182	0.272727	0	0.272727	7.81818	3	6.72727	1.09091	0	0.363636	7.54545
Grb10	12		Mean	14.1026	3.20513	40.3846	19.8718	0.403846	12	1.69231	0.384615	4.84615	2.38462	2.69231	617.486	404.692	534.447	659.242	275.587	270.074	268.097	390.582	410.488	314.453	583.998	672.423	229.773	59.0769	24.7692	28.6154	5.69231	15.5385	16.6923	4.30769	0.384615	0.461538	21.6923	10.3077	6.76923	0.461538	0	0.0769231	7.15385	4.61538	7.30769	3.30769	0.384615	0.230769	12.7692
			SE	5.53601	1.26767	4.39133	4.20437	0.0439133	0	0.664321	0.15212	0.526959	0.504525	0.60712	135.561	192.854	126.106	182.282	51.0985	47.5044	57.6812	408.383	387.602	447.425	82.0548	139.997	44.3182	5.39697	2.71847	3.07805	1.62521	1.313	1.45738	0.557444	0.0909091	0.50616	3.81233	0.664321	0.84011	0.140836	0	0.272727	1.5887	0.64667	0.982491	0.39207	0	0.278722	2.22532
			SE	5.84198	2.09222	3.23438	3.99393	0.0323438	0	0.701037	0.251066	0.388125	0.479271	0.505314	161.963	299.773	125.531	273.14	72.4589	104.533	65.4226	132.975	166.612	157.795	96.5128	108.629	53.9124	12.859	5.46981	8.08423	1.26592	1.86568	2.89248	1.72556	0.323575	0.345916	7.54743	0.701037	2.62243	0.190591	0	0.0800641	2.54364	1.62249	0.720577	1.67657	0.323575	0.240192	5.28514
Session Last -2
Choice - B1		C1
GB0	27	WT	E0	0	0	87.5	12.5	0.875	8	0	0	7	1	0.875	885.875	0	592.286	2941	399.5	263	1355	827.375	887.714	405	73.75	69.2857	105	27	13	12	2	13	11	1	0	0	2	8	3	0	0	0	2	5	7	0	0	0	0
GB1	34	WT	E0	37.5	12.5	37.5	12.5	0.375	8	3	1	3	1	0.75	1591.8	1601	1656	1390	708.75	789.667	466	95.5	96	94	587.25	671.667	334	22	13	4	5	8	12	0	0	0	2	5	8	0	0	0	0	1	3	0	0	0	0
GF0	32	WT	E0	50	0	50	0	0.5	8	4	0	4	0	1	1040.5	0	1040.5	0	276.5	276.5	0	531.75	531.75	0	46.25	46.25	0	17	7	10	0	8	7	2	0	0	0	4	3	0	0	0	0	4	4	2	0	0	0
GF1	32	WT	E0	0	0	87.5	12.5	0.875	8	0	0	7	1	0.875	208.875	0	196.571	295	139.625	138.571	147	84.125	84.1429	84	1034.12	1109	510	48	21	18	9	10	12	3	0	0	23	8	4	0	0	0	9	2	7	3	0	0	6
GC0	34	+ve	E0	0	0	75	25	0.75	8	0	0	6	2	0.75	909.625	0	768.5	1333	587.75	582.667	603	155.75	152.5	165.5	1161.25	1337.5	632.5	49	19	17	13	17	15	3	1	0	13	8	7	0	1	0	3	5	6	2	0	0	4
GC1	33	WT	E0	0	0	50	50	0.5	8	0	0	4	4	0.5	205.75	0	91.75	319.75	153.25	182.5	124	117.25	115.25	119.25	161.25	149.5	173	32	15	7	10	10	11	2	0	0	9	8	3	0	0	0	4	2	4	0	0	0	1
GC2	32	+ve	E0	0	0	100	0	1	8	0	0	8	0	1	893.875	0	893.875	0	135.75	135.75	0	548.625	548.625	0	557.75	557.75	0	41	19	19	3	11	14	3	0	0	13	8	6	0	0	0	5	2	8	3	0	0	6
GC3	27	+ve	E0	0	0	100	0	1	8	0	0	8	0	1	461.25	0	461.25	0	46.625	46.625	0	73.625	73.625	0	957.5	957.5	0	42	9	33	0	24	9	7	2	0	0	8	1	0	0	0	0	16	8	7	2	0	0
GE0	27	+ve	E0	0	0	87.5	12.5	0.875	8	0	0	7	1	0.875	331.875	0	340.429	272	133.25	137.286	105	67.875	62.7143	104	465.125	491.571	280	55	20	27	8	8	10	4	0	1	32	8	2	0	0	0	10	0	7	1	0	1	18
GE1	27	+ve	E0	0	0	100	0	1	8	0	0	8	0	1	155.125	0	155.125	0	99.625	99.625	0	30.625	30.625	0	702.625	702.625	0	27	16	10	1	9	9	0	0	0	9	8	1	0	0	0	7	1	8	0	0	0	1
GE2	32	WT	E0	0	0	100	0	1	8	0	0	8	0	1	255.375	0	255.375	0	44.625	44.625	0	983.5	983.5	0	18.125	18.125	0	31	12	17	2	14	10	0	0	1	6	8	2	0	0	1	1	5	8	0	0	0	4
GE3	27	+ve	E0	0	0	100	0	1	8	0	0	8	0	1	163.875	0	163.875	0	103.625	103.625	0	2319.88	2319.88	0	662.25	662.25	0	31	10	20	1	14	8	1	0	7	1	8	0	0	0	2	0	6	8	1	0	4	1
GK1	35	WT	E0	25	12.5	37.5	25	0.375	8	2	1	3	2	0.6	760.5	900	189.667	1547	449.2	165.667	874.5	109.4	115.667	100	755	954	456.5	38	17	13	8	9	12	3	0	0	14	6	7	0	0	0	4	1	3	3	0	0	6
GK2	25	WT	E0	0	0	75	25	0.75	8	0	0	6	2	0.75	214.125	0	241.167	133	115	130.167	69.5	346.875	404.5	174	36.75	16.5	97.5	73	29	25	19	11	11	5	1	9	36	8	3	1	0	4	13	1	6	1	0	5	12
GK3	33	+ve	E0	0	0	100	0	1	8	0	0	8	0	1	666.875	0	666.875	0	103.375	103.375	0	321.875	321.875	0	784.875	784.875	0	29	10	13	6	9	8	0	0	0	12	8	0	0	0	0	2	0	8	0	0	0	5
GK4	27	+ve	E0	0	0	100	0	1	8	0	0	8	0	1	90.125	0	90.125	0	167.25	167.25	0	94.375	94.375	0	722.125	722.125	0	178	86	92	0	9	45	22	3	0	99	8	37	0	0	0	41	1	8	22	3	0	58
GA0	32	WT	E0	0	0	87.5	12.5	0.875	8	0	0	7	1	0.875	227.25	0	259	5	221.125	242.857	69	133	142.143	69	171.375	152.143	306	42	22	17	3	12	11	1	0	6	12	8	3	0	0	4	7	4	7	1	0	0	5
GA1	27	WT	E0	0	0	87.5	12.5	0.875	8	0	0	7	1	0.875	257.125	0	264.571	205	159.375	141.429	285	71.125	58.5714	159	682.125	743	256	35	14	13	8	10	11	3	0	0	11	8	3	0	0	0	3	1	7	0	0	0	5
GA2	27	+ve	E0	0	0	62.5	37.5	0.625	8	0	0	5	3	0.625	484.25	0	572.2	337.667	164.125	165.6	161.667	1566.75	2135.4	619	27.625	33	18.6667	47	17	24	6	11	10	4	0	3	19	8	2	0	0	2	5	3	5	3	0	1	12
GJ1	35	+ve	E0	12.5	0	50	37.5	0.5	8	1	0	4	3	0.571429	1045.29	0	791	1384.33	653.714	781.5	483.333	123.143	95	160.667	681.714	926	356	14	7	4	3	7	7	0	0	0	0	7	0	0	0	0	0	0	4	0	0	0	0
GJ2	32	+ve	E0	0	0	87.5	12.5	0.875	8	0	0	7	1	0.875	800.75	0	787.286	895	203.875	110.571	857	157.875	154.714	180	887.5	972.429	293	37	10	21	6	20	9	1	0	0	7	8	1	0	0	0	1	10	7	1	0	0	3
GJ3	32	WT	E0	0	0	87.5	12.5	0.875	8	0	0	7	1	0.875	187.75	0	174.429	281	87.375	94.2857	39	98.75	98.5714	100	182.625	183.429	177	41	16	23	2	14	9	1	0	3	14	8	1	1	0	1	5	6	7	0	0	1	9
GG1	32	+ve	E0	0	0	87.5	12.5	0.875	8	0	0	7	1	0.875	412.5	0	324.714	1027	163.5	135.429	360	95.5	97.5714	81	759.875	833.429	245	27	11	12	4	8	10	1	0	0	8	8	2	0	0	0	1	0	7	1	0	0	4
GG2	27	+ve	E0	0	0	100	0	1	8	0	0	8	0	1	277.5	0	277.5	0	93.375	93.375	0	110.625	110.625	0	730.625	730.625	0	56	15	41	0	8	11	4	0	0	33	8	3	0	0	0	4	0	8	4	0	0	29
WT	11		Mean	10.2273	2.27273	71.5909	15.9091	0.715909	8	0.818182	0.181818	5.72727	1.27273	0.815909	530.448	227.364	451.029	646.977	250.393	224.479	311.727	308.968	319.801	118.568	340.784	373.9	219.545	36.9091	16.2727	14.4545	6.18182	10.8182	10.6364	1.90909	0.0909091	1.72727	11.7273	7.18182	3.63636	0.181818	0	0.909091	4.36364	2.90909	5.72727	0.909091	0	0.545455	4.36364
Grb10	12		Mean	0.961538	0	88.4615	10.5769	0.884615	8	0.0769231	0	7.07692	0.846154	0.89011	514.839	0	484.058	403.769	204.295	204.821	197.692	435.886	476.733	100.782	700.065	747.052	140.397	48.6923	19.1538	25.6154	3.92308	11.9231	12.6923	3.84615	0.461538	0.846154	18.9231	7.92308	4.76923	0	0.0769231	0.307692	6.07692	3.38462	7.07692	3.46154	0.384615	0.461538	10.8462
			SE	5.54378	1.52459	6.96805	4.15977	0.0696805	0	0.443502	0.121967	0.557444	0.332782	0.0467431	142.526	159.675	144.976	281.205	59.5913	60.427	130.674	99.0519	102.381	33.0032	107.454	124.025	51.4169	4.52157	1.78423	1.91816	1.63939	0.658071	0.452724	0.45636	0.0909091	0.92531	3.1539	0.443502	0.621914	0.121967	0	0.475864	1.2081	0.579256	0.557444	0.368154	0	0.454545	1.18531
			SE	1.0008	0	4.76477	4.12641	0.0476477	0	0.0800641	0	0.381181	0.330113	0.0438343	92.1501	0	80.4204	158.501	54.7627	62.9346	82.9307	202.017	228.05	49.5886	77.0861	87.6252	58.64	11.7564	5.93348	6.41671	1.10844	1.53416	2.87804	1.68674	0.279269	0.58744	7.59062	0.0800641	2.86539	0	0.0800641	0.216815	3.1523	1.40207	0.381181	1.70626	0.27735	0.325222	4.74904
Choice - B2		C2
GB0	27	WT	E0	37.5	0	62.5	0	0.625	8	3	0	5	0	1	1449.8	0	1449.8	0	338	338	0	734.8	734.8	0	97.2	97.2	0	29	8	21	0	12	5	2	0	0	10	5	0	0	0	0	3	7	5	2	0	0	7
GB1	34	WT	E0	50	37.5	0	12.5	0	8	4	3	0	1	0	1562.75	1568.33	0	1546	1899	0	1899	132	0	132	285	0	285	9	6	0	3	5	3	0	0	0	1	4	2	0	0	0	0	0	0	0	0	0	0
GF0	32	WT	E0	87.5	0	12.5	0	0.125	8	7	0	1	0	1	2625	0	2625	0	965	965	0	745	745	0	35	35	0	9	5	2	2	3	1	1	0	0	4	1	0	0	0	0	4	0	1	1	0	0	0
GF1	32	WT	E0	37.5	0	62.5	0	0.625	8	3	0	5	0	1	1046	0	1046	0	325.2	325.2	0	421.8	421.8	0	789.2	789.2	0	15	6	7	2	7	5	2	0	0	1	5	0	0	0	0	1	0	5	2	0	0	0
GC0	34	+ve	E0	12.5	0	50	37.5	0.5	8	1	0	4	3	0.571429	1946.29	0	2005.5	1867.33	397	379.5	420.333	152.143	147	159	932.571	1208.5	564.667	42	10	18	14	24	7	1	0	0	10	7	0	1	0	0	2	10	4	0	0	0	4
GC1	33	WT	E0	0	0	37.5	62.5	0.375	8	0	0	3	5	0.375	384.75	0	571.333	272.8	236	176.333	271.8	173	240	132.8	181.625	227	154.4	35	14	14	7	11	10	4	0	0	10	8	2	2	0	0	2	3	3	0	0	0	8
GC2	32	+ve	E0	0	0	87.5	12.5	0.875	8	0	0	7	1	0.875	1453	0	1578.57	574	80.875	52	283	6387	3215.14	28590	66.125	72	25	21	10	9	2	8	8	0	0	5	0	8	0	0	0	2	0	0	7	0	0	2	0
GC3	27	+ve	E0	0	0	100	0	1	8	0	0	8	0	1	685.875	0	685.875	0	48.75	48.75	0	77.25	77.25	0	872.875	872.875	0	39	10	29	0	18	8	11	0	0	2	8	0	0	0	0	2	10	8	11	0	0	0
GE0	27	+ve	E0	0	0	87.5	12.5	0.875	8	0	0	7	1	0.875	294.5	0	313.429	162	230.625	255.286	58	64.25	62.7143	75	281.5	248.571	512	42	14	22	6	16	10	3	0	0	13	8	2	0	0	0	4	6	7	3	0	0	6
GE1	27	+ve	E0	0	0	100	0	1	8	0	0	8	0	1	463.5	0	463.5	0	165.25	165.25	0	34.75	34.75	0	628.5	628.5	0	18	8	10	0	8	8	1	0	0	1	8	0	0	0	0	0	0	8	1	0	0	1
GE2	32	WT	E0	12.5	0	87.5	0	0.875	8	1	0	7	0	1	810.857	0	810.857	0	61	61	0	1415	1415	0	38.1429	38.1429	0	33	11	20	2	17	8	1	0	0	7	7	1	0	0	0	3	9	7	1	0	0	3
GE3	27	+ve	E0	0	0	87.5	12.5	0.875	8	0	0	7	1	0.875	438.25	0	472.714	197	142.5	147.714	106	833.125	951.571	4	587.5	622.143	345	20	9	10	1	11	9	0	0	0	0	8	1	0	0	0	0	3	7	0	0	0	0
GK1	35	WT	E0	50	25	0	25	0	8	4	2	0	2	0	1309.75	1392	0	1227.5	816.5	0	816.5	177.5	0	177.5	259	0	259	19	12	0	7	5	6	1	0	0	7	4	4	0	0	0	4	0	0	0	0	0	0
GK2	25	WT	E0	0	0	62.5	37.5	0.625	8	0	0	5	3	0.625	314.625	0	329	290.667	137.5	94.4	209.333	341.75	478.4	114	53.25	29.8	92.3333	61	26	26	9	9	12	6	1	1	32	8	4	0	0	0	14	0	5	4	1	1	15
GK3	33	+ve	E0	12.5	0	50	37.5	0.5	8	1	0	4	3	0.571429	1791.43	0	1591.5	2058	111.714	94.75	134.333	3288.43	371.5	7177.67	281.143	392.25	133	35	12	16	7	17	10	0	0	7	1	7	3	0	0	2	0	9	4	0	0	3	0
GK4	27	+ve	E0	0	0	100	0	1	8	0	0	8	0	1	190.375	0	190.375	0	95.75	95.75	0	92.25	92.25	0	717.125	717.125	0	86	26	60	0	13	24	32	9	0	8	8	16	0	0	0	2	5	8	32	9	0	6
GA0	32	WT	E0	0	0	75	25	0.75	8	0	0	6	2	0.75	149.25	0	137.167	185.5	229.25	233.333	217	116.125	119.167	107	205.125	206.333	201.5	34	15	13	6	8	10	2	0	3	11	8	2	0	0	1	4	0	6	2	0	2	3
GA1	27	WT	E0	0	0	75	25	0.75	8	0	0	6	2	0.75	369.375	0	421.833	212	88	100.667	50	67.25	60.8333	86.5	596.625	721.833	221	22	10	10	2	10	10	2	0	0	0	8	2	0	0	0	0	2	6	2	0	0	0
GA2	27	+ve	E0	12.5	0	62.5	25	0.625	8	1	0	5	2	0.714286	842.429	0	1000.4	447.5	381.143	476.2	143.5	1823.71	2281	680.5	27.2857	33.6	11.5	30	13	13	4	8	11	3	0	0	8	7	4	0	0	0	2	1	5	1	0	0	6
GJ1	35	+ve	E0	75	0	12.5	12.5	0.125	8	6	0	1	1	0.5	2425	0	1358	3492	1288.5	1349	1228	4525.5	228	8823	450	700	200	15	3	7	5	8	2	1	0	0	4	2	0	0	0	0	1	2	1	1	0	0	3
GJ2	32	+ve	E0	0	0	87.5	12.5	0.875	8	0	0	7	1	0.875	647.875	0	681.857	410	321.25	343.429	166	122.25	122.571	120	778.375	851.571	266	29	9	17	3	14	9	2	0	0	4	8	1	0	0	0	0	4	7	2	0	0	4
GJ3	32	WT	E0	0	0	87.5	12.5	0.875	8	0	0	7	1	0.875	285.75	0	292.429	239	112.375	118.429	70	263.125	287	96	93.5	85	153	35	16	16	3	11	8	2	0	2	12	8	0	1	0	1	6	3	7	1	0	1	4
GG1	32	+ve	E0	25	0	62.5	12.5	0.625	8	2	0	5	1	0.833333	1212.17	0	1112	1713	103.5	82.6	208	1760.5	2088	123	350.167	382.6	188	17	8	6	3	7	7	2	0	1	0	6	1	1	0	0	0	0	5	1	0	0	0
GG2	27	+ve	E0	62.5	0	37.5	0	0.375	8	5	0	3	0	1	354.667	0	354.667	0	87.3333	87.3333	0	98	98	0	638.667	638.667	0	13	7	6	0	4	7	0	0	0	2	3	4	0	0	0	0	1	3	0	0	0	2
WT	11		Mean	25	5.68182	51.1364	18.1818	0.511364	8	2	0.454545	4.09091	1.45455	0.670455	937.082	269.121	698.493	361.224	473.439	219.306	321.239	417.032	409.273	76.8909	239.424	202.683	124.203	27.3636	11.7273	11.7273	3.90909	8.90909	7.09091	2.09091	0.0909091	0.545455	8.63636	6	1.54545	0.272727	0	0.181818	3.72727	2.18182	4.09091	1.36364	0.0909091	0.363636	3.63636
Grb10	12		Mean	15.3846	0	71.1538	13.4615	0.711538	8	1.23077	0	5.69231	1.07692	0.822344	980.412	0	908.338	840.064	265.707	275.197	211.321	1481.47	751.519	3519.4	508.603	566.8	172.705	31.3077	10.6923	17.1538	3.46154	12	9.23077	4.30769	0.692308	1	4.07692	6.76923	2.46154	0.153846	0	0.307692	1	3.92308	5.69231	4	0.692308	0.384615	2.46154
			SE	8.91883	3.90354	10.0361	5.92655	0.100361	0	0.713506	0.312283	0.802887	0.474124	0.115887	228.231	180.923	235.377	158.313	168.139	82.2694	173.465	122.286	128.604	19.6966	73.5656	85.6176	33.5522	4.52523	1.82453	2.65977	0.857635	1.1867	1.02207	0.494599	0.0909091	0.312283	2.67062	0.713506	0.454545	0.194978	0	0.121967	1.16846	0.951727	0.802887	0.363636	0.0909091	0.203279	1.4351
			SE	7.23997	0	7.98553	3.74465	0.0798553	0	0.579198	0	0.638842	0.299572	0.0512996	207.803	0	167.419	316.66	94.9494	101.241	95.3167	593.616	308.66	2336.69	84.39	96.2392	57.543	5.60058	1.55181	4.19961	1.14634	1.62447	1.42962	2.54511	0.720577	0.656167	1.24422	0.579198	1.25064	0.108407	0	0.216815	0.372678	1.09584	0.638842	2.57391	0.720577	0.27735	0.722797
Choice - B3		C3
GB0	27	WT	E0	37.5	0	62.5	0	0.625	8	3	0	5	0	1	1379	0	1379	0	217.6	217.6	0	554.4	554.4	0	94.2	94.2	0	19	8	11	0	10	8	1	0	0	0	5	3	0	0	0	0	5	5	1	0	0	0
GB1	34	WT	E0	50	25	12.5	12.5	0.125	8	4	2	1	1	0.5	818.5	496	1327	955	1000.5	75	1926	77.5	63	92	499.5	744	255	12	7	4	1	4	4	0	0	0	4	4	2	0	0	0	1	0	1	0	0	0	3
GF0	32	WT	E0	75	0	0	25	0	8	6	0	0	2	0	2953.5	0	0	2953.5	217	0	217	8327	0	8327	95	0	95	4	2	0	2	2	2	0	0	0	0	2	0	0	0	0	0	0	0	0	0	0	0
GF1	32	WT	E0	75	12.5	12.5	0	0.125	8	6	1	1	0	1	1553	1626	1480	0	419	419	0	17661	17661	0	2	2	0	9	3	2	4	4	2	0	0	0	3	2	1	0	0	0	0	1	1	0	0	0	0
GC0	34	+ve	E0	0	50	37.5	12.5	0.375	8	0	4	3	1	0.75	1835.25	2020	891	3929	793	795.667	785	141.25	139	148	720.75	848	339	59	18	29	12	20	9	4	1	0	25	8	5	0	0	0	5	6	3	4	1	0	15
GC1	33	WT	E0	12.5	0	62.5	25	0.625	8	1	0	5	2	0.714286	396.429	0	350	512.5	188.429	164	249.5	122	105	164.5	129.143	142.2	96.5	36	15	17	4	10	13	3	0	0	10	7	6	0	0	0	2	3	5	2	0	0	7
GC2	32	+ve	E0	25	0	62.5	12.5	0.625	8	2	0	5	1	0.833333	1496.17	0	1641.2	771	69.6667	70.4	66	2321.33	2506.8	1394	39.1667	44	15	16	7	7	2	8	6	1	0	0	1	6	0	0	0	0	1	2	5	0	0	0	0
GC3	27	+ve	E0	0	0	100	0	1	8	0	0	8	0	1	1089.5	0	1089.5	0	108.25	108.25	0	74.25	74.25	0	755.5	755.5	0	39	8	31	0	15	8	15	1	0	0	8	0	0	0	0	0	7	8	15	1	0	0
GE0	27	+ve	E0	0	0	87.5	12.5	0.875	8	0	0	7	1	0.875	624.5	0	554	1118	192.625	140.857	555	160.25	160.286	160	158.25	151	209	28	8	17	3	15	8	2	0	1	2	8	0	0	0	0	0	6	7	1	0	1	2
GE1	27	+ve	E0	12.5	0	75	12.5	0.75	8	1	0	6	1	0.857143	949.857	0	1027.33	485	487.429	453	694	101	80.5	224	564.571	614.833	263	17	8	8	1	8	8	1	0	0	0	7	1	0	0	0	0	1	6	1	0	0	0
GE2	32	WT	E0	75	0	25	0	0.25	8	6	0	2	0	1	2929.5	0	2929.5	0	262.5	262.5	0	1450.5	1450.5	0	77.5	77.5	0	8	2	4	2	6	2	0	0	0	0	2	0	0	0	0	0	2	2	0	0	0	0
GE3	27	+ve	E0	12.5	12.5	62.5	12.5	0.625	8	1	1	5	1	0.833333	840.286	1476	737.4	719	400.5	241.2	1197	333.667	373.6	134	764.5	880	187	17	7	7	3	7	6	3	0	0	1	7	0	0	0	0	0	0	5	2	0	0	0
GK1	35	WT	E0	0	0	0	0	0	8	0	0	0	0	0	0	0	0	0	0	0	0	0	0	0	0	0	0	0	0	0	0	0	0	0	0	0	0	0	0	0	0	0	0	0	0	0	0	0	0
GK2	25	WT	E0	0	0	62.5	37.5	0.625	8	0	0	5	3	0.625	231.125	0	234.6	225.333	139.125	143.2	132.333	302.25	378.6	175	35.375	25.8	51.3333	54	15	31	8	11	10	3	2	3	25	8	2	0	0	1	4	2	5	3	2	1	18
GK3	33	+ve	E0	12.5	12.5	25	50	0.25	8	1	1	2	4	0.333333	1185.43	1548	437.5	1468.75	122.667	85.5	141.25	4148	3240.5	4601.75	35.5	31.5	37.5	18	9	3	6	10	7	0	0	1	0	7	1	0	0	1	0	1	2	0	0	0	0
GK4	27	+ve	E0	0	12.5	87.5	0	0.875	8	0	1	7	0	1	583.75	1169	500.143	0	224.286	224.286	0	118	118	0	628.286	628.286	0	70	23	47	0	13	20	31	6	0	0	8	13	1	1	0	0	5	7	30	5	0	0
GA0	32	WT	E0	0	0	100	0	1	8	0	0	8	0	1	351	0	351	0	145.5	145.5	0	186	186	0	112.625	112.625	0	37	18	16	3	11	10	3	0	2	11	8	2	0	0	1	7	3	8	3	0	0	2
GA1	27	WT	E0	0	0	87.5	12.5	0.875	8	0	0	7	1	0.875	715.875	0	727	638	102.625	107.143	71	179.5	68.1429	959	682.75	745.429	244	24	8	9	7	10	8	3	1	1	1	8	0	0	0	0	0	2	7	0	0	0	0
GA2	27	+ve	E0	37.5	12.5	50	0	0.5	8	3	1	4	0	1	2155.6	3635	1785.75	0	489.75	489.75	0	1694.25	1694.25	0	38.5	38.5	0	11	5	6	0	5	4	2	0	0	0	5	0	0	0	0	0	0	4	2	0	0	0
GJ1	35	+ve	E0	100	0	0	0	0	8	8	0	0	0	0	0	0	0	0	0	0	0	0	0	0	0	0	0	3	0	0	3	1	0	0	0	0	2	0	0	0	0	0	0	0	0	0	0	0	0
GJ2	32	+ve	E0	12.5	12.5	62.5	12.5	0.625	8	1	1	5	1	0.833333	723	1376	632.6	522	198	143.6	470	127.667	124.4	144	697.833	785.2	261	44	20	20	4	13	11	4	0	0	16	7	5	0	0	0	8	5	5	4	0	0	6
GJ3	32	WT	E0	0	0	87.5	12.5	0.875	8	0	0	7	1	0.875	482.625	0	491	424	138.375	106.714	360	94.875	96.4286	84	103.5	110.286	56	23	8	14	1	13	8	1	0	0	1	8	0	0	0	0	0	5	7	1	0	0	1
GG1	32	+ve	E0	50	12.5	37.5	0	0.375	8	4	1	3	0	1	2500.25	3229	2257.33	0	392.667	392.667	0	13765.3	13765.3	0	301	301	0	24	10	6	8	8	4	1	0	9	2	4	1	0	0	4	1	2	3	1	0	0	0
GG2	27	+ve	E0	37.5	0	62.5	0	0.625	8	3	0	5	0	1	2145	0	2145	0	112	112	0	4199.2	4199.2	0	131.4	131.4	0	20	10	10	0	7	8	1	0	1	3	5	3	0	0	1	1	2	5	1	0	0	2
WT	11		Mean	29.5455	3.40909	46.5909	11.3636	0.465909	8	2.36364	0.272727	3.72727	0.909091	0.689935	1073.69	192.909	842.645	518.939	257.332	149.151	268.712	2632.28	1869.37	891.045	166.508	186.731	72.5303	20.5455	7.81818	9.81818	2.90909	7.36364	6.09091	1.27273	0.272727	0.545455	5	4.90909	1.45455	0	0	0.181818	1.27273	2.09091	3.72727	0.909091	0.181818	0.0909091	2.81818
Grb10	12		Mean	23.0769	9.61538	57.6923	9.61538	0.576923	8	1.84615	0.769231	4.61538	0.769231	0.793498	1240.66	1111.77	1053.75	693.288	276.218	250.552	300.635	2091.09	2036.62	523.519	371.943	400.709	100.885	28.1538	10.2308	14.6923	3.23077	10	7.61538	5	0.615385	0.923077	4	6.15385	2.23077	0.0769231	0.0769231	0.461538	1.23077	2.84615	4.61538	4.69231	0.538462	0.0769231	1.92308
			SE	10.1512	2.43723	11.3181	3.93648	0.113181	0	0.812099	0.194978	0.905447	0.314918	0.114652	311.694	150.168	264.484	262.387	80.7465	36.2036	169.938	1672.32	1584.27	748.321	65.7756	84.545	28.7311	4.96234	1.80815	2.82784	0.802887	1.30225	1.28243	0.428335	0.194978	0.312283	2.3316	0.919037	0.561874	0	0	0.121967	0.688753	0.546968	0.905447	0.368154	0.181818	0.0909091	1.65044
			SE	8.18171	3.94016	8.00641	3.94016	0.0800641	0	0.654537	0.315213	0.640513	0.315213	0.0862793	213.266	367.862	201.946	314.188	64.5388	64.642	115.137	1105.36	1096.32	369.804	91.8152	102.106	37.2848	5.64068	1.84147	3.94121	1.04186	1.45297	1.33613	2.51937	0.479271	0.711625	2.19848	0.654537	1.07467	0.0800641	0.0800641	0.325222	0.708616	0.743921	0.640513	2.47595	0.401653	0.0800641	1.23862
Forced - B1		F1		DNS	Omits	Left	Right	Inco	Trials	DNS	Omits	Left	Right	Inco
GB0	27	WT	E0	0	0	50	50	0.5	4	0	0	2	2	0	1073.25	0	433.5	1713	481.25	150	812.5	427.75	561.5	294	152	145	159	17	7	4	6	6	5	2	0	0	4	4	1	1	0	0	1	2	2	0	0	0	0
GB1	34	WT	E0	25	0	50	25	0.5	4	1	0	2	1	0	1501.33	0	1322.5	1859	1171.67	977	1561	85.3333	78.5	99	765.667	958.5	380	11	7	3	1	4	5	1	0	0	1	3	2	1	0	0	1	1	2	0	0	0	0
GF0	32	WT	E0	0	0	50	25	0.5	4	0	0	2	1	1	703	0	611.5	932	138.667	93.5	229	109.333	95	138	115.667	90.5	166	27	9	12	6	6	7	2	0	0	12	4	3	0	0	0	2	0	3	0	0	0	9
GF1	32	WT	E0	0	0	50	50	0.5	4	0	0	2	2	0	136.5	0	183	90	152	86	218	101.25	99.5	103	775.25	1097	453.5	29	12	13	4	4	4	2	0	0	19	4	0	0	0	0	8	0	2	1	0	0	10
GC0	34	+ve	E0	25	0	25	25	0.25	4	1	0	1	1	1	1863.67	0	198	2233	374	139	609	82.5	61	104	1320	1545	1095	31	12	10	9	12	6	0	0	0	13	3	3	0	0	0	6	5	2	0	0	0	3
GC1	33	WT	E0	0	0	50	25	0.5	4	0	0	2	1	1	807.75	0	1268.5	627	244.333	169.5	394	97.3333	100.5	91	97.3333	76	140	12	6	5	1	4	6	0	0	0	2	4	2	0	0	0	0	0	3	0	0	0	2
GC2	32	+ve	E0	0	0	50	0	0.5	4	0	0	2	0	2	363.5	0	616.5	0	280	280	0	413.5	413.5	0	626.5	626.5	0	18	8	10	0	4	7	1	0	0	6	4	3	0	0	0	1	0	4	1	0	0	5
GC3	27	+ve	E0	0	0	50	0	0.5	4	0	0	2	0	2	396.25	0	449	0	44.5	44.5	0	77.5	77.5	0	940.5	940.5	0	25	11	14	0	8	6	2	0	0	9	4	2	0	0	0	5	4	4	2	0	0	4
GE0	27	+ve	E0	0	0	50	50	0.5	4	0	0	2	2	0	243.5	0	207	280	121	156	86	98	78.5	117.5	240	212.5	267.5	36	12	18	6	6	5	5	0	0	20	4	1	1	0	0	6	0	2	3	0	0	13
GE1	27	+ve	E0	0	0	50	50	0.5	4	0	0	2	2	0	166.25	0	220	112.5	106.5	60	153	38	28.5	47.5	580.25	779.5	381	13	4	3	6	4	4	2	0	0	3	4	0	0	0	0	0	0	2	0	0	0	1
GE2	32	WT	E0	0	0	50	25	0.5	4	0	0	2	1	1	254.5	0	417	54	50.3333	55.5	40	1534.67	2148.5	307	104	148	16	40	17	15	8	6	4	0	0	3	27	4	0	0	0	1	12	2	3	0	0	1	9
GE3	27	+ve	E0	0	0	50	50	0.5	4	0	0	2	2	0	113.5	0	101	126	96.75	79.5	114	3194.5	4941	1448	393.5	584.5	202.5	26	14	9	3	4	4	0	0	16	2	4	0	0	0	8	2	0	2	0	0	7	0
GK1	35	WT	E0	0	0	50	25	0.5	4	0	0	2	1	1	423.75	0	543	142	386.333	345.5	468	64	74	44	828.667	1019	448	20	10	7	3	5	9	1	0	0	5	4	5	0	0	0	1	0	3	1	0	0	3
GK2	25	WT	E0	0	0	50	25	0.5	4	0	0	2	1	1	392.5	0	260	635	355.667	156	755	423.333	536.5	197	32.3333	31.5	34	29	10	10	9	5	6	2	0	0	16	4	2	1	0	0	3	1	3	1	0	0	5
GK3	33	+ve	E0	0	0	50	25	0.5	4	0	0	2	1	1	1527	0	946	3899	285	67	721	417.333	502	248	568.333	660.5	384	16	7	6	3	5	4	1	0	0	6	4	0	0	0	0	3	0	3	1	0	0	2
GK4	27	+ve	E0	0	0	50	0	0.5	4	0	0	2	0	2	185.75	0	254	0	137.5	137.5	0	103.5	103.5	0	765.5	765.5	0	81	42	39	0	4	29	7	0	0	41	4	25	2	0	0	11	0	4	5	0	0	30
GA0	32	WT	E0	0	0	50	25	0.5	4	0	0	2	1	1	472.25	0	453.5	319	159.667	203	73	92.3333	76	125	192.667	55	468	19	7	8	4	7	4	1	0	2	5	4	0	0	0	1	2	3	3	0	0	0	2
GA1	27	WT	E0	0	0	50	25	0.5	4	0	0	2	1	1	180	0	228	164	400	308	584	87.6667	83.5	96	656.667	832	306	15	7	6	2	4	5	1	0	0	5	4	1	1	0	0	1	0	3	0	0	0	3
GA2	27	+ve	E0	0	0	50	50	0.5	4	0	0	2	2	0	362.5	0	390	335	222	146.5	297.5	1393	1435	1351	12.5	7.5	17.5	27	8	12	7	4	4	3	0	3	13	4	0	0	0	0	4	0	2	1	0	2	7
GJ1	35	+ve	E0	0	0	50	50	0.5	4	0	0	2	2	0	1003.25	0	1925.5	81	990.5	1502.5	478.5	72.25	82.5	62	698.25	947.5	449	8	4	2	2	4	4	0	0	0	0	4	0	0	0	0	0	0	2	0	0	0	0
GJ2	32	+ve	E0	25	0	25	0	0.25	4	1	0	1	0	2	1486	0	880	0	97	97	0	162	162	0	996	996	0	21	6	15	0	15	5	0	0	0	1	3	2	0	0	0	1	12	3	0	0	0	0
GJ3	32	WT	E0	0	0	50	0	0.5	4	0	0	2	0	2	265.25	0	401	0	61	61	0	106.5	106.5	0	206	206	0	19	7	10	2	6	4	0	0	0	9	4	0	0	0	0	3	1	4	0	0	0	5
GG1	32	+ve	E0	0	0	50	0	0.5	4	0	0	2	0	2	837	0	918.5	0	357	357	0	396.5	396.5	0	608.5	608.5	0	22	8	10	4	6	5	0	0	0	11	4	1	0	0	0	3	1	4	0	0	0	5
GG2	27	+ve	E0	0	0	50	0	0.5	4	0	0	2	0	2	430.25	0	154.5	0	150	150	0	102	102	0	1178	1178	0	24	10	14	0	4	6	2	0	0	12	4	2	0	0	0	4	0	4	2	0	0	8
WT	11		Mean	2.27273	0	50	27.2727	0.5	4	0.0909091	0	2	1.09091	0.818182	564.553	0	556.5	594.091	327.356	236.818	466.773	284.5	360	135.818	356.932	423.5	233.682	21.6364	9	8.45455	4.18182	5.18182	5.36364	1.09091	0	0.454545	9.54545	3.90909	1.45455	0.363636	0	0.181818	3.09091	0.909091	2.81818	0.272727	0	0.0909091	4.36364
Grb10	12		Mean	3.84615	0	46.1538	23.0769	0.461538	4	0.153846	0	1.84615	0.923077	1.07692	690.647	0	558.462	543.577	250.904	247.423	189.154	503.891	644.885	259.846	686.756	757.846	215.115	26.7692	11.2308	12.4615	3.07692	6.15385	6.84615	1.76923	0	1.46154	10.5385	3.84615	3	0.230769	0	0.615385	3.53846	1.69231	2.92308	1.15385	0	0.692308	6
			SE	2.27273	0	0	4.06558	0	0	0.0909091	0	0	0.162623	0.181818	127.544	0	116.838	198.464	95.1149	79.2904	137.922	131.344	187.285	28.7771	97.2872	134.272	55.3169	2.63291	0.972345	1.17058	0.829218	0.325246	0.472377	0.250619	0	0.312283	2.45825	0.0909091	0.474124	0.15212	0	0.121967	1.09921	0.314918	0.181818	0.140836	0	0.0909091	1.08102
			SE	2.71018	0	2.71018	6.88543	0.0271018	0	0.108407	0	0.108407	0.275417	0.275417	171.984	0	147.406	339.25	71.0574	111.799	73.921	255.812	388.349	147.582	104.881	113.719	91.4597	5.16822	2.81157	2.65784	0.901091	1.01957	1.9431	0.62532	0	1.28352	3.12609	0.108407	1.93649	0.172958	0	0.640513	0.878883	1.01642	0.275417	0.438529	0	0.5699	2.34817
Forced - B2		F2		DNS	Omits	Left	Right	Inco	Trials	DNS	Omits	Left	Right	Inco
GB0	27	WT	E0	0	0	50	50	0.5	4	0	0	2	2	0	597	0	583.5	610.5	515.25	221	809.5	599.5	819.5	379.5	150.25	197	103.5	20	10	4	6	4	7	1	0	0	8	4	3	0	0	0	3	0	2	0	0	0	2
GB1	34	WT	E0	50	50	0	0	0	4	2	2	0	0	0	1949	1949	0	0	0	0	0	0	0	0	0	0	0	8	5	2	1	3	1	0	0	0	4	2	1	0	0	0	2	0	0	0	0	0	2
GF0	32	WT	E0	50	25	0	25	0	4	2	1	0	1	0	1906.5	628	0	3185	1004	0	1004	427	0	427	29	0	29	15	4	7	4	11	3	0	0	0	1	2	2	0	0	0	0	7	0	0	0	0	0
GF1	32	WT	E0	0	0	50	25	0.5	4	0	0	2	1	1	419.25	0	244	983	165.667	224.5	48	79	72	93	854.667	1111.5	341	15	8	5	2	4	4	1	0	0	6	4	0	0	0	0	4	0	3	1	0	0	1
GC0	34	+ve	E0	0	0	50	50	0.5	4	0	0	2	2	0	933.75	0	546.5	1321	608.25	259.5	957	177	101.5	252.5	1016.25	1358	674.5	26	11	8	7	10	8	0	0	1	7	4	4	0	0	0	3	2	2	0	0	0	4
GC1	33	WT	E0	0	0	50	50	0.5	4	0	0	2	2	0	328	0	472.5	183.5	134.75	93.5	176	133.5	121	146	197.75	223	172.5	25	6	16	3	5	6	3	1	0	10	4	2	0	0	0	0	1	2	2	1	0	10
GC2	32	+ve	E0	0	0	50	50	0.5	4	0	0	2	2	0	1210.75	0	1472	949.5	610.25	47.5	1173	1704.5	2605.5	803.5	244	210.5	277.5	12	6	2	4	4	4	1	0	3	0	4	0	0	0	2	0	0	2	0	0	0	0
GC3	27	+ve	E0	0	0	50	0	0.5	4	0	0	2	0	2	235.5	0	322	0	39.5	39.5	0	80	80	0	902.5	902.5	0	19	5	14	0	4	4	2	1	0	8	4	0	0	0	0	1	0	4	2	1	0	7
GE0	27	+ve	E0	0	0	50	50	0.5	4	0	0	2	2	0	192.25	0	227	157.5	314.25	289.5	339	88.5	80	97	210	129	291	19	7	9	3	4	4	1	0	0	10	4	0	0	0	0	3	0	2	1	0	0	6
GE1	27	+ve	E0	0	0	50	50	0.5	4	0	0	2	2	0	130.75	0	166	95.5	183.5	48	319	63	21	105	475	682	268	14	5	7	2	6	5	0	0	0	3	4	1	0	0	0	0	2	2	0	0	0	3
GE2	32	WT	E0	0	0	50	0	0.5	4	0	0	2	0	2	1086.75	0	1043.5	0	32	32	0	1092.5	1092.5	0	18.5	18.5	0	19	5	10	4	10	5	0	0	0	4	4	1	0	0	0	0	4	4	0	0	0	2
GE3	27	+ve	E0	0	0	50	0	0.5	4	0	0	2	0	2	262	0	143	0	71.5	71.5	0	3043	3043	0	575.5	575.5	0	16	7	9	0	6	6	1	0	0	3	4	2	0	0	0	1	2	4	1	0	0	2
GK1	35	WT	E0	75	25	0	0	0	4	3	1	0	0	0	3660	3660	0	0	0	0	0	0	0	0	0	0	0	6	4	1	1	1	0	0	0	0	5	1	0	0	0	0	3	0	0	0	0	0	1
GK2	25	WT	E0	0	0	25	25	0.25	4	0	0	1	1	2	439.25	0	809	260	79.5	80	79	364	543	185	39.5	26	53	37	12	13	12	9	5	3	1	0	19	4	1	0	0	0	7	4	2	0	1	0	6
GK3	33	+ve	E0	0	0	50	50	0.5	4	0	0	2	2	0	538.5	0	634	443	196.25	169.5	223	205.25	293.5	117	468	665	271	10	4	3	3	5	4	1	0	0	0	4	0	0	0	0	0	1	2	0	0	0	0
GK4	27	+ve	E0	0	0	50	0	0.5	4	0	0	2	0	2	199	0	264	0	134	134	0	84	84	0	733.5	733.5	0	60	25	35	0	11	16	8	2	0	23	4	12	0	0	0	9	7	4	8	2	0	14
GA0	32	WT	E0	0	0	50	0	0.5	4	0	0	2	0	2	91	0	66.5	0	272	272	0	70	70	0	63	63	0	21	11	9	1	4	4	1	0	4	8	4	0	0	0	3	4	0	4	1	0	0	4
GA1	27	WT	E0	0	0	50	50	0.5	4	0	0	2	2	0	490.75	0	566	415.5	200.25	279.5	121	76.75	73	80.5	623	998.5	247.5	11	4	4	3	5	4	1	0	0	1	4	0	0	0	0	0	1	2	1	0	0	0
GA2	27	+ve	E0	0	0	50	50	0.5	4	0	0	2	2	0	498.25	0	627	369.5	361.5	365.5	357.5	2421	4088.5	753.5	38.25	42	34.5	34	6	14	14	4	5	4	0	10	11	4	1	0	0	0	1	0	2	1	0	8	3
GJ1	35	+ve	E0	100	0	0	0	0	4	4	0	0	0	0	0	0	0	0	0	0	0	0	0	0	0	0	0	0	0	0	0	0	0	0	0	0	0	0	0	0	0	0	0	0	0	0	0	0	0
GJ2	32	+ve	E0	0	0	50	50	0.5	4	0	0	2	2	0	1044.5	0	823	1266	245.25	53.5	437	219.25	106	332.5	580.5	908	253	12	7	3	2	5	6	0	0	0	1	4	2	0	0	0	1	1	2	0	0	0	0
GJ3	32	WT	E0	0	0	50	0	0.5	4	0	0	2	0	2	235.25	0	321.5	0	59	59	0	270	270	0	72.5	72.5	0	20	7	13	0	6	4	0	0	0	10	4	0	0	0	0	3	2	4	0	0	0	7
GG1	32	+ve	E0	0	0	50	50	0.5	4	0	0	2	2	0	1406.25	0	1712.5	1100	196	262.5	129.5	1056	523	1589	310.25	371.5	249	14	7	2	5	6	7	1	0	0	0	4	3	0	0	0	0	0	2	0	0	0	0
GG2	27	+ve	E0	0	0	50	0	0.5	4	0	0	2	0	2	329	0	364.5	0	141	141	0	90.5	90.5	0	669	669	0	17	9	8	0	5	8	0	0	0	4	4	4	0	0	0	1	1	4	0	0	0	3
WT	11		Mean	15.9091	9.09091	34.0909	20.4545	0.340909	4	0.636364	0.363636	1.36364	0.818182	0.818182	1018.43	567	373.318	512.5	223.856	114.682	203.409	282.932	278.273	119.182	186.197	246.364	86.0455	17.9091	6.90909	7.63636	3.36364	5.63636	3.90909	0.909091	0.181818	0.363636	6.90909	3.36364	0.909091	0	0	0.272727	2.36364	1.72727	2.09091	0.454545	0.181818	0	3.18182
Grb10	12		Mean	7.69231	0	46.1538	30.7692	0.461538	4	0.307692	0	1.84615	1.23077	0.615385	536.962	0	561.654	438.615	238.558	144.731	302.692	710.154	855.115	311.538	478.673	557.423	178.346	19.4615	7.61538	8.76923	3.07692	5.38462	5.92308	1.46154	0.230769	1.07692	5.38462	3.69231	2.23077	0	0	0.153846	1.53846	1.23077	2.46154	1	0.230769	0.615385	3.23077
			SE	8.44281	5.08197	6.96805	6.58699	0.0696805	0	0.337712	0.203279	0.278722	0.26348	0.295979	326.662	357.418	107.1	283.932	90.0901	33.8877	107.125	99.7716	113.263	46.785	85.8577	122.977	35.7025	2.59179	0.888866	1.49102	1.0115	0.936849	0.609837	0.342572	0.121967	0.363636	1.53418	0.337712	0.314918	0	0	0.272727	0.677867	0.701828	0.475864	0.207305	0.121967	0	0.970643
			SE	8.00641	0	4.0032	7.30882	0.040032	0	0.320256	0	0.160128	0.292353	0.27735	132.348	0	148.497	151.956	55.7301	33.5408	108.738	297.447	405.416	136.55	90.0761	113.915	57.4702	4.21244	1.68135	2.61182	1.14541	0.795285	1.06368	0.652084	0.172958	0.811904	1.90226	0.320256	0.95127	0	0	0.160128	0.713125	0.5547	0.345916	0.634648	0.172958	0.640513	1.15563
Forced - B3		F3		DNS	Omits	Left	Right	Inco	Trials	DNS	Omits	Left	Right	Inco
GB0	27	WT	E0	0	0	50	25	0.5	4	0	0	2	1	1	1386.25	0	1959.5	331	440.667	451.5	419	640.333	812	297	144	124.5	183	29	7	11	11	13	5	0	0	0	11	4	1	0	0	0	2	8	3	0	0	0	0
GB1	34	WT	E0	50	25	0	0	0	4	2	1	0	0	1	3084	2911	0	0	0	0	0	0	0	0	0	0	0	8	5	3	0	2	3	0	0	0	3	2	2	0	0	0	1	0	1	0	0	0	2
GF0	32	WT	E0	50	0	25	25	0.25	4	2	0	1	1	0	1463	0	1630	1296	741.5	854	629	439.5	441	438	32	5	59	7	3	2	2	3	3	1	0	0	0	2	1	0	0	0	0	1	1	0	0	0	0
GF1	32	WT	E0	0	50	25	0	0.25	4	0	2	1	0	1	744	698	775	0	121	121	0	2181	2181	0	595	595	0	10	4	1	5	4	2	0	0	0	4	4	0	0	0	0	0	0	1	0	0	0	0
GC0	34	+ve	E0	50	0	25	25	0.25	4	2	0	1	1	0	1033.5	0	570	1497	267	112	422	155.5	98	213	678	949	407	24	11	5	8	6	3	2	0	0	13	2	1	0	0	0	8	0	1	2	0	0	2
GC1	33	WT	E0	0	0	50	25	0.5	4	0	0	2	1	1	355.75	0	216	482	151.333	153.5	147	127.667	102.5	178	220.667	267.5	127	14	7	4	3	4	6	1	0	0	3	4	2	0	0	0	1	0	3	0	0	0	1
GC2	32	+ve	E0	25	0	25	50	0.25	4	1	0	1	2	0	1021.33	0	1293	885.5	626.333	62	908.5	4747.67	1676	6283.5	252.333	654	51.5	7	4	1	2	3	4	0	0	0	0	3	1	0	0	0	0	0	1	0	0	0	0
GC3	27	+ve	E0	0	25	50	0	0.5	4	0	1	2	0	1	898	2808	350	0	36.5	36.5	0	71.5	71.5	0	888.5	888.5	0	26	6	20	0	10	3	4	0	0	9	4	0	0	0	0	2	6	3	4	0	0	7
GE0	27	+ve	E0	0	0	50	25	0.5	4	0	0	2	1	1	547.25	0	767.5	165	186	223	112	305.667	407.5	102	253	275.5	208	16	6	5	5	8	6	1	0	0	1	4	2	0	0	0	0	1	3	1	0	0	0
GE1	27	+ve	E0	0	0	50	25	0.5	4	0	0	2	1	1	1124.75	0	849	2183	191.333	81.5	411	54.3333	38	87	476	583	262	9	5	3	1	4	5	0	0	0	0	4	1	0	0	0	0	0	3	0	0	0	0
GE2	32	WT	E0	0	25	0	0	0	4	0	1	0	0	3	1376.25	1495	0	0	0	0	0	0	0	0	0	0	0	29	9	15	5	9	3	0	0	0	17	4	0	0	0	0	5	4	2	0	0	0	9
GE3	27	+ve	E0	0	0	50	50	0.5	4	0	0	2	2	0	164	0	186.5	141.5	237.75	84	391.5	1089.25	2087.5	91	139	19.5	258.5	10	6	2	2	4	6	0	0	0	0	4	2	0	0	0	0	0	2	0	0	0	0
GK1	35	WT	E0	25	25	0	0	0	4	1	1	0	0	0	1900	1900	0	0	0	0	0	0	0	0	0	0	0	6	2	0	4	1	1	0	0	0	4	1	1	0	0	0	0	0	0	0	0	0	0
GK2	25	WT	E0	0	0	50	25	0.5	4	0	0	2	1	1	506.5	0	377	597	81.3333	55	134	114.333	105	133	10.6667	10.5	11	37	9	20	8	8	5	5	0	7	12	4	1	0	0	1	3	4	3	4	0	5	4
GK3	33	+ve	E0	0	25	50	25	0.5	4	0	1	2	1	0	1946.5	1225	2430	1701	131.333	82.5	229	7322.67	5350.5	11267	122.333	95	177	11	5	4	2	7	3	0	0	1	0	4	0	0	0	1	0	2	2	0	0	0	0
GK4	27	+ve	E0	0	0	50	0	0.5	4	0	0	2	0	2	230.25	0	225.5	0	106	106	0	91	91	0	666	666	0	53	25	28	0	4	23	6	0	0	20	4	19	0	0	0	2	0	4	6	0	0	18
GA0	32	WT	E0	0	0	50	25	0.5	4	0	0	2	1	1	1058.75	0	624.5	2822	195	117.5	350	196.667	216	158	164.667	126.5	241	16	6	6	4	5	6	3	0	0	2	4	2	0	0	0	0	1	3	0	0	0	2
GA1	27	WT	E0	0	0	50	25	0.5	4	0	0	2	1	1	809.75	0	572	1966	244.667	312	110	98.6667	102.5	91	619.667	801	257	12	5	6	1	5	5	2	0	0	0	4	1	0	0	0	0	1	3	2	0	0	0
GA2	27	+ve	E0	25	0	50	25	0.5	4	1	0	2	1	0	944.333	0	607	1619	855.333	919.5	727	1114.33	1325.5	692	33	35	29	8	4	3	1	4	4	0	0	0	0	3	1	0	0	0	0	1	2	0	0	0	0
GJ1	35	+ve	E0	50	25	25	0	0.25	4	2	1	1	0	0	3633.5	3902	3365	0	727	727	0	4935	4935	0	4	4	0	4	2	2	0	3	1	0	0	0	0	2	0	0	0	0	0	1	1	0	0	0	0
GJ2	32	+ve	E0	0	0	25	25	0.25	4	0	0	1	1	2	1070.5	0	183	2999	748.5	486	1011	169.5	137	202	512.5	799	226	15	5	5	5	7	4	0	0	0	4	4	0	0	0	0	1	3	2	0	0	0	0
GJ3	32	WT	E0	0	0	50	25	0.5	4	0	0	2	1	1	204.75	0	246	165	115.667	85	177	259	342	93	66.6667	50	100	16	7	8	1	5	5	2	0	0	4	4	1	1	0	0	1	1	3	1	0	0	3
GG1	32	+ve	E0	0	0	50	25	0.5	4	0	0	2	1	1	1100.25	0	271.5	3616	441.667	347	631	9542.33	13530.5	1566	116.667	35.5	279	21	6	6	9	5	4	1	0	7	4	4	0	0	0	1	1	0	3	1	0	0	2
GG2	27	+ve	E0	50	0	25	0	0.25	4	2	0	1	0	1	2334.5	0	1666	0	68	68	0	317	317	0	475	475	0	9	4	5	0	2	2	3	0	0	2	2	0	0	0	0	2	0	2	3	0	0	0
WT	11		Mean	11.3636	11.3636	31.8182	15.9091	0.318182	4	0.454545	0.454545	1.27273	0.636364	1	1171.73	636.727	581.818	696.273	190.106	195.409	178.727	368.833	391.091	126.182	168.485	180	88.9091	16.7273	5.81818	6.90909	4	5.36364	4	1.27273	0	0.636364	5.45455	3.36364	1.09091	0.0909091	0	0.0909091	1.18182	1.81818	2.09091	0.636364	0	0.454545	1.90909
Grb10	12		Mean	15.3846	5.76923	40.3846	21.1538	0.403846	4	0.615385	0.230769	1.61538	0.846154	0.692308	1234.51	610.385	981.846	1139	355.596	256.538	372.538	2301.21	2312.69	1577.19	355.103	421.462	146	16.3846	6.84615	6.84615	2.69231	5.15385	5.23077	1.30769	0	0.615385	4.07692	3.38462	2.07692	0	0	0.153846	1.23077	1.07692	2.23077	1.30769	0	0	2.23077
			SE	6.18249	5.18262	6.81818	3.803	0.0681818	0	0.247299	0.207305	0.272727	0.15212	0.23355	247.349	306.691	198.632	284.465	67.5472	78.2037	62.1814	190.893	193.62	42.2309	69.2742	82.2922	30.2109	3.12495	0.685143	1.87546	0.98165	1.03812	0.504525	0.487869	0	0.636364	1.64241	0.337712	0.211254	0.0909091	0	0.0909091	0.482761	0.7606	0.342572	0.387831	0	0.454545	0.825222
			SE	6.27665	3.16481	3.65441	4.97053	0.0365441	0	0.251066	0.126592	0.146176	0.198821	0.216815	269.248	370.507	282.127	358.979	83.2235	82.4483	103.254	933.263	1104.78	975.866	81.0067	103.543	40.053	3.73151	1.68262	2.28779	0.892753	0.665062	1.59493	0.557582	0	0.559495	1.8084	0.251066	1.48353	0	0	0.108407	0.636329	0.50637	0.267547	0.557582	0	0	1.48209
Choice Total		CT		DNS	Omits	Left	Right	All Bias
GB0	27	WT	E0	25	0	70.8333	4.16667	0.708333	24	6	0	17	1	0.944444	1179.5	0	1075.88	2941	331.889	271.706	1355	725.833	744.706	405	85.9444	84.8235	105	75	29	44	2	35	24	4	0	0	12	18	6	0	0	0	5	17	17	3	0	0	7
GB1	34	WT	E0	45.8333	25	16.6667	12.5	0.166667	24	11	6	4	3	0.571429	1344.92	1216.33	1573.75	1297	962.143	611	1430.33	95.5714	87.75	106	519	689.75	291.333	43	26	8	9	17	19	0	0	0	7	13	12	0	0	0	1	1	4	0	0	0	3
GF0	32	WT	E0	70.8333	0	20.8333	8.33333	0.208333	24	17	0	5	2	0.714286	1813.43	0	1357.4	2953.5	357.857	414.2	217	2789.43	574.4	8327	58.5714	44	95	30	14	12	4	13	10	3	0	0	4	7	3	0	0	0	4	4	5	3	0	0	0
GF1	32	WT	E0	37.5	4.16667	54.1667	4.16667	0.541667	24	9	1	13	1	0.928571	667.133	1626	622	295	225.857	231.923	147	1460.21	1566.08	84	872.929	900.846	510	72	30	27	15	21	19	5	0	0	27	15	5	0	0	0	10	3	13	5	0	0	6
GC0	34	+ve	E0	4.16667	16.6667	54.1667	25	0.541667	24	1	4	13	6	0.684211	1547.09	2020	1177.38	2032.83	560.684	569.308	542	151.368	147.692	159.333	984.263	1184.85	549.667	150	47	64	39	61	31	8	2	0	48	23	12	1	1	0	10	21	13	6	1	0	23
GC1	33	WT	E0	4.16667	0	50	45.8333	0.5	24	1	0	12	11	0.521739	326.043	0	319.25	333.455	192.739	173.25	214	138.087	142.167	133.636	158.565	165.833	150.636	103	44	38	21	31	34	9	0	0	29	23	11	2	0	0	8	8	12	2	0	0	16
GC2	32	+ve	E0	8.33333	0	83.3333	8.33333	0.833333	24	2	0	20	2	0.909091	1261.45	0	1320.35	672.5	97.7727	90.1	174.5	3155.14	1971.45	14992	237.545	259.3	20	78	36	35	7	27	28	4	0	5	14	22	6	0	0	2	6	4	20	3	0	2	6
GC3	27	+ve	E0	0	0	100	0	1	24	0	0	24	0	1	745.542	0	745.542	0	67.875	67.875	0	75.0417	75.0417	0	861.958	861.958	0	120	27	93	0	57	25	33	3	0	2	24	1	0	0	0	2	33	24	33	3	0	0
GE0	27	+ve	E0	0	0	87.5	12.5	0.875	24	0	0	21	3	0.875	416.958	0	402.619	517.333	185.5	177.81	239.333	97.4583	95.2381	113	301.625	297.048	333.667	125	42	66	17	39	28	9	0	2	47	24	4	0	0	0	14	12	21	5	0	2	26
GE1	27	+ve	E0	4.16667	0	91.6667	4.16667	0.916667	24	1	0	22	1	0.956522	504.261	0	505.136	485	240.478	219.864	694	53.4783	45.7273	224	634.826	651.727	263	62	32	28	2	25	25	2	0	0	10	23	2	0	0	0	7	2	22	2	0	0	2
GE2	32	WT	E0	29.1667	0	70.8333	0	0.708333	24	7	0	17	0	1	798.706	0	798.706	0	77	77	0	1216.12	1216.12	0	33.3529	33.3529	0	72	25	41	6	37	20	1	0	1	13	17	3	0	0	1	4	16	17	1	0	0	7
GE3	27	+ve	E0	4.16667	4.16667	83.3333	8.33333	0.833333	24	1	1	20	2	0.909091	465.174	1476	415.35	458	198.727	153.45	651.5	1237.55	1354.4	69	662.955	702.65	266	68	26	37	5	32	23	4	0	7	2	23	1	0	0	2	0	9	20	3	0	4	1
GK1	35	WT	E0	25	12.5	12.5	16.6667	0.125	24	6	3	3	4	0.428571	980.2	1228	189.667	1387.25	554.143	165.667	845.5	128.857	115.667	138.75	613.286	954	357.75	57	29	13	15	14	18	4	0	0	21	10	11	0	0	0	8	1	3	3	0	0	6
GK2	25	WT	E0	0	0	66.6667	33.3333	0.666667	24	0	0	16	8	0.666667	253.292	0	266.562	226.75	130.542	123.062	145.5	330.292	419.5	151.875	41.7917	23.5625	78.25	188	70	82	36	31	33	14	4	13	93	24	9	1	0	5	31	3	16	8	3	7	45
GK3	33	+ve	E0	8.33333	4.16667	58.3333	29.1667	0.583333	24	2	1	14	7	0.666667	1189.68	1548	898.286	1721.29	111.667	98.3571	138.286	2403.9	753	5705.71	402.857	565.071	78.4286	82	31	32	19	36	25	0	0	8	13	22	4	0	0	3	2	10	14	0	0	3	5
GK4	27	+ve	E0	0	4.16667	95.8333	0	0.958333	24	0	1	23	0	1	288.083	1169	249.783	0	159.739	159.739	0	100.826	100.826	0	691.826	691.826	0	334	135	199	0	35	89	85	18	0	107	24	66	1	1	0	43	11	23	84	17	0	64
GA0	32	WT	E0	0	0	87.5	12.5	0.875	24	0	0	21	3	0.875	242.5	0	259.238	125.333	198.625	203.048	167.667	145.042	152.286	94.3333	163.042	152.571	236.333	113	55	46	12	31	31	6	0	11	34	24	7	0	0	6	18	7	21	6	0	2	10
GA1	27	WT	E0	0	0	83.3333	16.6667	0.833333	24	0	0	20	4	0.833333	447.458	0	473.6	316.75	116.667	117.2	114	105.958	62.6	322.75	653.833	737.5	235.5	81	32	32	17	30	29	8	1	1	12	24	5	0	0	0	3	5	20	2	0	0	5
GA2	27	+ve	E0	16.6667	4.16667	58.3333	20.8333	0.583333	24	4	1	14	5	0.736842	1027.45	3635	1071.86	381.6	312.632	369.143	154.4	1688.26	2061.36	643.6	29.7895	34.7857	15.8	88	35	43	10	24	25	9	0	3	27	20	6	0	0	2	7	4	14	6	0	1	18
GJ1	35	+ve	E0	62.5	0	20.8333	16.6667	0.208333	24	15	0	5	4	0.555556	1351.89	0	904.4	1911.25	794.778	895	669.5	1101.44	121.6	2326.25	630.222	880.8	317	32	10	11	11	16	9	1	0	0	6	9	0	0	0	0	1	2	5	1	0	0	3
GJ2	32	+ve	E0	4.16667	4.16667	79.1667	12.5	0.791667	24	1	1	19	3	0.863636	723.913	1376	707.737	609	244.955	205.053	497.667	136.682	134.895	148	796.091	878.632	273.333	110	39	58	13	47	29	7	0	0	27	23	7	0	0	0	9	19	19	7	0	0	13
GJ3	32	WT	E0	0	0	87.5	12.5	0.875	24	0	0	21	3	0.875	318.708	0	319.286	314.667	112.708	106.476	156.333	152.25	160.667	93.3333	126.542	126.238	128.667	99	40	53	6	38	25	4	0	5	27	24	1	2	0	2	11	14	21	2	0	2	14
GG1	32	+ve	E0	25	4.16667	62.5	8.33333	0.625	24	6	1	15	2	0.882353	1143	3229	973.667	1370	182.765	169.267	284	3095.47	3494.6	102	534.294	576.667	216.5	68	29	24	15	23	21	4	0	10	10	18	4	1	0	4	2	2	15	3	0	0	4
GG2	27	+ve	E0	33.3333	0	66.6667	0	0.666667	24	8	0	16	0	1	875.562	0	875.562	0	98.0625	98.0625	0	1385.94	1385.94	0	526.125	526.125	0	89	32	57	0	19	26	5	0	1	38	16	10	0	0	1	5	3	16	5	0	0	33
WT	11		Mean	21.5909	3.78788	56.4394	15.1515	0.564394	24	5.18182	0.909091	13.5455	3.63636	0.759913	761.081	370.03	659.576	926.428	296.379	226.776	435.667	662.514	476.54	896.062	302.442	355.68	198.952	84.8182	35.8182	36	13	27.0909	23.8182	5.27273	0.454545	2.81818	25.3636	18.0909	6.63636	0.454545	0	1.27273	9.36364	7.18182	13.5455	3.18182	0.272727	1	10.8182
Grb10	12		Mean	13.141	3.20513	72.4359	11.2179	0.724359	24	3.15385	0.769231	17.3846	2.69231	0.849151	887.697	1111.77	788.283	781.446	250.433	251.771	311.168	1129.43	903.213	1883.3	561.106	623.957	179.492	108.154	40.0769	57.4615	10.6154	33.9231	29.5385	13.1538	1.76923	2.76923	27	20.8462	9.46154	0.230769	0.153846	1.07692	8.30769	10.1538	17.3846	12.1538	1.61538	0.923077	15.2308
			SE	7.0804	2.41357	8.52736	4.06205	0.0852736	0	1.69929	0.579256	2.04657	0.974891	0.0575908	156.43	193.653	145.18	330.331	78.7202	47.8285	156.963	257.613	153.394	743.89	90.9654	113.907	44.1375	12.7706	4.72097	6.45544	2.91392	2.76818	2.24345	1.18391	0.365902	1.44485	7.37967	1.8803	1.11415	0.247299	0	0.661828	2.58764	1.77773	2.04657	0.698286	0.272727	0.64667	3.6849
			SE	5.19318	1.31339	6.29878	2.75094	0.0629878	0	1.24636	0.315213	1.51171	0.660225	0.0415229	115.462	367.862	93.1234	210.288	59.8241	68.1645	76.7559	336.632	313.434	1228.02	76.5474	88.0294	50.2383	21.5229	8.62608	13.7788	3.11702	4.04911	5.38467	6.67588	1.43447	1.02844	8.33167	1.24636	5.00779	0.126592	0.108407	0.398984	3.22831	2.69991	1.51171	6.68107	1.35677	0.398984	5.24292
Forced Total		FT		DNS	Omits	Left	Right	Inco	Trials	DNS	Omits	Left	Right	Inco
GB0	27	WT	E0	0	0	50	41.6667	0.5	12	0	0	6	5	1	1018.83	0	992.167	995.6	482.545	274.167	732.6	548.182	731	328.8	149.182	155.5	141.6	66	24	19	23	23	17	3	0	0	23	12	5	1	0	0	6	10	7	0	0	0	2
GB1	34	WT	E0	41.6667	25	16.6667	8.33333	0.166667	12	5	3	2	1	1	2081.43	2269.67	1322.5	1859	1171.67	977	1561	85.3333	78.5	99	765.667	958.5	380	27	17	8	2	9	9	1	0	0	8	7	5	1	0	0	4	1	3	0	0	0	4
GF0	32	WT	E0	33.3333	8.33333	25	25	0.25	12	4	1	3	3	1	1193.88	628	951	1804.33	483.833	347	620.667	272.333	210.333	334.333	73.3333	62	84.6667	49	16	21	12	20	13	3	0	0	13	8	6	0	0	0	2	8	4	0	0	0	9
GF1	32	WT	E0	0	16.6667	41.6667	25	0.416667	12	0	2	5	3	2	433.25	698	325.8	387.667	153.25	148.4	161.333	352.875	504.8	99.6667	782.5	1002.4	416	54	24	19	11	12	10	3	0	0	29	12	0	0	0	0	12	0	6	2	0	0	11
GC0	34	+ve	E0	25	0	33.3333	33.3333	0.333333	12	3	0	4	4	1	1265.89	0	465.25	1593	464.375	192.5	736.25	148	90.5	205.5	1007.62	1302.5	712.75	81	34	23	24	28	17	2	0	1	33	9	8	0	0	0	17	7	5	2	0	0	9
GC1	33	WT	E0	0	0	50	33.3333	0.5	12	0	0	6	4	2	497.167	0	652.333	369	172.6	138.833	223.25	120.9	108	140.25	174.5	188.833	153	51	19	25	7	13	18	4	1	0	15	12	6	0	0	0	1	1	8	2	1	0	13
GC2	32	+ve	E0	8.33333	0	41.6667	33.3333	0.416667	12	1	0	5	4	2	851	0	1094	917.5	542.222	143.4	1040.75	2432	1542.8	3543.5	331.778	465.6	164.5	37	18	13	6	11	15	2	0	3	6	11	4	0	0	2	1	0	7	1	0	0	5
GC3	27	+ve	E0	0	8.33333	50	0	0.5	12	0	1	6	0	5	509.917	2808	373.667	0	40.1667	40.1667	0	76.3333	76.3333	0	910.5	910.5	0	70	22	48	0	22	13	8	1	0	26	12	2	0	0	0	8	10	11	8	1	0	18
GE0	27	+ve	E0	0	0	50	41.6667	0.5	12	0	0	6	5	1	327.667	0	400.5	208	209	222.833	192.4	151.182	188.667	106.2	232.636	205.667	265	71	25	32	14	18	15	7	0	0	31	12	3	1	0	0	9	1	7	5	0	0	19
GE1	27	+ve	E0	0	0	50	41.6667	0.5	12	0	0	6	5	1	473.917	0	411.667	519.8	157.636	63.1667	271	51.5455	29.1667	78.4	513.545	681.5	312	36	14	13	9	14	14	2	0	0	6	12	2	0	0	0	0	2	7	0	0	0	4
GE2	32	WT	E0	0	8.33333	33.3333	8.33333	0.333333	12	0	1	4	1	6	905.833	1495	730.25	54	43	43.75	40	1357.8	1620.5	307	69.8	83.25	16	88	31	40	17	25	12	0	0	3	48	12	1	0	0	1	17	10	9	0	0	1	20
GE3	27	+ve	E0	0	0	50	33.3333	0.5	12	0	0	6	4	2	179.833	0	143.5	133.75	148.1	78.3333	252.75	2322.1	3357.17	769.5	328.1	393.167	230.5	52	27	20	5	14	16	1	0	16	5	12	4	0	0	8	3	2	8	1	0	7	2
GK1	35	WT	E0	33.3333	16.6667	16.6667	8.33333	0.166667	12	4	2	2	1	1	1209.17	2780	543	142	386.333	345.5	468	64	74	44	828.667	1019	448	32	16	8	8	7	10	1	0	0	14	6	6	0	0	0	4	0	3	1	0	0	4
GK2	25	WT	E0	0	0	41.6667	25	0.416667	12	0	0	5	3	4	446.083	0	416.6	497.333	183.75	100.4	322.667	292.625	365.2	171.667	26	22	32.6667	103	31	43	29	22	16	10	1	7	47	12	4	1	0	1	13	9	8	5	1	5	15
GK3	33	+ve	E0	0	8.33333	50	33.3333	0.5	12	0	1	6	4	1	1337.33	1225	1336.67	1621.5	203.4	106.333	349	2404.1	2048.67	2937.25	394.4	473.5	275.75	37	16	13	8	17	11	2	0	1	6	12	0	0	0	1	3	3	7	1	0	0	2
GK4	27	+ve	E0	0	0	50	0	0.5	12	0	0	6	0	6	205	0	247.833	0	125.833	125.833	0	92.8333	92.8333	0	721.667	721.667	0	194	92	102	0	19	68	21	2	0	84	12	56	2	0	0	22	7	12	19	2	0	62
GA0	32	WT	E0	0	0	50	16.6667	0.5	12	0	0	6	2	4	540.667	0	381.5	1570.5	201	197.5	211.5	125.875	120.667	141.5	149.75	81.5	354.5	56	24	23	9	16	14	5	0	6	15	12	2	0	0	4	6	4	10	1	0	0	8
GA1	27	WT	E0	0	0	50	33.3333	0.5	12	0	0	6	4	2	493.5	0	455.333	740.25	273.5	299.833	234	86.6	86.3333	87	632.1	877.167	264.5	38	16	16	6	14	14	4	0	0	6	12	2	1	0	0	1	2	8	3	0	0	3
GA2	27	+ve	E0	8.33333	0	50	41.6667	0.5	12	1	0	6	5	0	570.545	0	541.333	605.6	445.455	477.167	407.4	1690.82	2283	980.2	27.4545	28.1667	26.6	69	18	29	22	12	13	7	0	13	24	11	2	0	0	0	5	1	6	2	0	10	10
GJ1	35	+ve	E0	50	8.33333	25	16.6667	0.25	12	6	1	3	2	0	1880	3902	2405.33	81	937.8	1244	478.5	1044.8	1700	62	559.4	633	449	12	6	4	2	7	5	0	0	0	0	6	0	0	0	0	0	1	3	0	0	0	0
GJ2	32	+ve	E0	8.33333	0	33.3333	25	0.333333	12	1	0	4	3	4	1174.36	0	677.25	1843.67	367.857	172.5	628.333	196.857	127.75	289	620.429	902.75	244	48	18	23	7	27	15	0	0	0	6	11	4	0	0	0	3	16	7	0	0	0	0
GJ3	32	WT	E0	0	0	50	8.33333	0.5	12	0	0	6	1	5	235.083	0	322.833	165	83.8571	68.3333	177	218.571	239.5	93	108.143	109.5	100	55	21	31	3	17	13	2	0	0	23	12	1	1	0	0	7	4	11	1	0	0	15
GG1	32	+ve	E0	0	0	50	25	0.5	12	0	0	6	3	3	1114.5	0	967.5	1938.67	313.667	322.167	296.667	3738.22	4816.67	1581.33	312	338.5	259	57	21	18	18	17	16	2	0	7	15	12	4	0	0	1	4	1	9	1	0	0	7
GG2	27	+ve	E0	16.6667	0	41.6667	0	0.416667	12	2	0	5	0	5	770.6	0	540.8	0	130	130	0	140.4	140.4	0	833.8	833.8	0	50	23	27	0	11	16	5	0	0	18	10	6	0	0	0	7	1	10	5	0	0	11
WT	11		Mean	9.84848	6.81818	38.6364	21.2121	0.386364	12	1.18182	0.818182	4.63636	2.54545	2.63636	823.172	715.515	644.847	780.426	330.485	267.338	432.002	320.463	376.258	167.838	341.786	414.514	217.358	56.2727	21.7273	23	11.5455	16.1818	13.2727	3.27273	0.181818	1.45455	21.9091	10.6364	3.45455	0.454545	0	0.545455	6.63636	4.45455	7	1.36364	0.181818	0.545455	9.45455
Grb10	12		Mean	8.97436	1.92308	44.2308	25	0.442308	12	1.07692	0.230769	5.30769	3	2.38462	820.043	610.385	738.869	727.883	314.27	255.262	357.927	1114.55	1268.77	811.76	522.564	606.947	226.085	62.6154	25.6923	28.0769	8.84615	16.6923	18	4.53846	0.230769	3.15385	20	10.9231	7.30769	0.230769	0	0.923077	6.30769	4	7.61538	3.46154	0.230769	1.30769	11.4615
			SE	5.12695	2.71039	4.09371	3.61737	0.0409371	0	0.615234	0.325246	0.491246	0.434085	0.543937	160.952	306.962	97.8935	204.529	95.2843	78.0546	129.235	112.649	139.422	31.8123	99.8886	132.494	48.2469	6.84383	1.6954	3.42716	2.52394	1.76232	0.885139	0.810061	0.121967	0.801857	4.31373	0.716973	0.692343	0.157459	0	0.365902	1.58558	1.22373	0.8202	0.472377	0.121967	0.454545	1.77541
			SE	4.21975	1.05494	2.48153	4.60642	0.0248153	0	0.50637	0.126592	0.297784	0.552771	0.583791	147.062	370.507	175.204	220.217	69.8948	92.2243	88.7281	363.075	443.458	341.748	83.228	98.1022	58.7042	12.601	6.07063	7.14868	2.38876	1.79654	4.42844	1.62709	0.172958	1.57165	6.38792	0.50637	4.271	0.172958	0	0.639678	1.89804	1.36423	0.702559	1.51665	0.172958	0.938265	4.72966
[truncated: 95 more columns]

## Sheet: E0-Totals
				% Responses				All		Responses				% (AD/NA)	Latency to Initiate (CP)				Latency to respond (NP)			Latency to collect			Duration of first eat (PP)			Number of NPs				All NPs						Centre NPs only						Adjusted NPs only
Subject	Session	Gtype	Task	DNS	Omits	AD	NA	Bias	Trials	DNS	Omits	AD	NA	Bias	All	Omits	AD	NA	All	AD	NA	All	AD	NA	All	AD	NA	All	Centre	AD	NA	0	1	2	3	4	5	0	1	2	3	4	5	0	1	2	3	4	5
LAST
Choice - B1
GB0	29	WT	E0	0	0	100	0	1	8	0	0	8	0	1	389.375	.	389.375	.	84.625	84.625	.	1612.62	1612.62	.	113	113	.	83	28	43	12	23	10	6	.	16	28	8	2	.	.	4	14	14	8	6	.	6	9
GB1	36	WT	E0	12.5	0	75	12.5	0.75	8	1	0	6	1	0.857143	1809.57	.	1839.83	1628	381	423.667	125	75.2857	68	119	1062.71	1169.17	424	20	9	10	1	10	9	1	.	.	.	7	2	.	.	.	.	3	6	1	.	.	.
GF0	34	WT	E0	12.5	0	50	37.5	0.5	8	1	0	4	3	0.571429	785	.	691.25	910	532.143	838.5	123.667	479.714	664.75	233	146.714	110.75	194.667	24	12	9	3	8	12	1	.	.	3	7	5	.	.	.	.	1	4	1	.	.	3
GF1	34	WT	E0	0	0	100	0	1	8	0	0	8	0	1	531.625	.	531.625	.	285.875	285.875	.	77.75	77.75	.	1318.25	1318.25	.	31	14	15	2	10	9	2	.	.	10	8	1	.	.	.	5	2	8	2	.	.	3
GC0	36	+ve	E0	0	0	87.5	12.5	0.875	8	0	0	7	1	0.875	618.25	.	662	312	273.625	124.143	1320	90.25	84.4286	131	1147.25	1183	897	50	18	13	19	21	9	3	.	.	17	8	1	1	.	.	8	4	7	.	.	.	2
GC1	35	WT	E0	0	0	62.5	37.5	0.625	8	0	0	5	3	0.625	348.625	.	454.4	172.333	248.375	185.4	353.333	136	153	107.667	323.375	306.4	351.667	31	15	13	3	8	14	2	.	.	7	8	6	.	.	.	1	.	5	2	.	.	6
GC2	34	+ve	E0	0	0	100	0	1	8	0	0	8	0	1	312.25	.	312.25	.	58.25	58.25	.	75.625	75.625	.	1050.88	1050.88	.	34	18	14	2	8	11	1	.	.	14	8	3	.	.	.	7	.	8	1	.	.	5
GC3	29	+ve	E0	12.5	0	87.5	0	0.875	8	1	0	7	0	1	134.143	.	134.143	.	41.8571	41.8571	.	74.4286	74.4286	.	1126.43	1126.43	.	31	8	23	.	7	7	11	1	.	5	7	.	.	.	.	1	.	7	11	1	.	4
GE0	29	+ve	E0	0	0	100	0	1	8	0	0	8	0	1	493.625	.	493.625	.	100.625	100.625	.	59	59	.	537.375	537.375	.	44	14	27	3	17	10	3	.	.	14	8	2	.	.	.	4	9	8	3	.	.	7
GE1	29	+ve	E0	0	0	100	0	1	8	0	0	8	0	1	97.375	.	97.375	.	79	79	.	204.375	204.375	.	560.125	560.125	.	26	9	13	4	8	8	.	.	.	10	8	.	.	.	.	1	.	8	.	.	.	5
GE2	34	WT	E0	0	0	75	25	0.75	8	0	0	6	2	0.75	773.125	.	857.333	520.5	189.25	196.667	167	1123.88	1405.17	280	42.875	51.5	17	32	13	15	4	19	11	2	.	.	.	8	3	2	.	.	.	9	6	.	.	.	.
GE3	29	+ve	E0	0	0	100	0	1	8	0	0	8	0	1	155.625	.	155.625	.	76.375	76.375	.	714.625	714.625	.	511.5	511.5	.	29	9	20	.	17	9	.	.	3	.	8	1	.	.	.	.	9	8	.	.	3	.
GK1	37	WT	E0	0	0	75	25	0.75	8	0	0	6	2	0.75	437.25	.	490.167	278.5	345.625	330.667	390.5	90.25	87.3333	99	844.375	945.833	540	37	17	10	10	10	13	3	.	.	11	8	5	.	.	.	4	.	6	3	.	.	1
GK2	27	WT	E0	0	0	87.5	12.5	0.875	8	0	0	7	1	0.875	236.125	.	262.857	49	111	108.857	126	283.375	292.857	217	24.75	23.4286	34	58	23	23	12	9	14	5	1	14	15	8	6	.	.	4	5	.	7	5	1	5	5
GK3	35	+ve	E0	0	0	87.5	12.5	0.875	8	0	0	7	1	0.875	88.875	.	86.8571	103	55.375	57.1429	43	72.5	62	146	869.125	949.286	308	49	19	22	8	13	9	.	.	.	27	8	1	.	.	.	10	1	7	.	.	.	14
GK4	29	+ve	E0	0	0	100	0	1	8	0	0	8	0	1	72.375	.	72.375	.	193.75	193.75	.	135	135	.	904.125	904.125	.	166	72	94	.	9	33	24	3	.	97	8	25	2	.	.	37	1	8	22	3	.	60
GA0	34	WT	E0	0	0	100	0	1	8	0	0	8	0	1	520.875	.	520.875	.	153	153	.	68.125	68.125	.	436.875	436.875	.	51	16	31	4	15	9	.	.	3	24	8	1	.	.	2	5	7	8	.	.	1	15
GA1	29	WT	E0	0	0	100	0	1	8	0	0	8	0	1	201.25	.	201.25	.	79.125	79.125	.	50.625	50.625	.	724.5	724.5	.	33	15	13	5	13	11	1	.	.	8	8	3	.	.	.	4	3	8	1	.	.	1
GA2	29	+ve	E0	0	0	87.5	12.5	0.875	8	0	0	7	1	0.875	312	.	282	522	128.5	114.286	228	1551.38	1400.86	2605	36.375	33.4286	57	39	17	20	2	9	13	.	.	4	13	8	5	.	.	.	4	1	7	.	.	3	9
GJ1	37	+ve	E0	12.5	0	62.5	25	0.625	8	1	0	5	2	0.714286	860.857	.	858.2	867.5	524.714	553.2	453.5	65.8571	74.4	44.5	791.429	929.6	446	19	10	7	2	9	10	.	.	.	.	7	3	.	.	.	.	2	5	.	.	.	.
GJ2	34	+ve	E0	0	0	100	0	1	8	0	0	8	0	1	1651.25	.	1651.25	.	116.625	116.625	.	117.75	117.75	.	1038.12	1038.12	.	63	12	50	1	42	9	3	.	.	9	8	1	.	.	.	3	33	8	3	.	.	6
GJ3	34	WT	E0	0	0	87.5	12.5	0.875	8	0	0	7	1	0.875	250	.	229.571	393	117.5	123.143	78	101.625	101.429	103	282.25	307.143	108	39	14	22	3	14	9	2	.	.	14	8	1	1	.	.	4	6	7	1	.	.	8
GG1	34	+ve	E0	12.5	0	50	37.5	0.5	8	1	0	4	3	0.571429	392.714	.	561.25	168	318.286	129.75	569.667	175.143	83.25	297.667	540.286	771.5	232	27	9	8	10	10	7	3	.	.	7	7	.	.	.	.	2	2	4	2	.	.	.
GG2	29	+ve	E0	0	0	100	0	1	8	0	0	8	0	1	190.375	.	190.375	.	78.625	78.625	.	106.75	106.75	.	823.375	823.375	.	47	18	29	.	9	12	3	.	.	23	8	4	.	.	.	6	1	8	3	.	.	17
WT	11		Mean	2.27273	0	82.9545	14.7727	0.829545	8	0.181818	0	6.63636	1.18182	0.845779	571.166	#DIV/0!	588.049	564.476	229.774	255.411	194.786	372.659	416.515	165.524	483.607	500.622	238.476	39.9091	16	18.5455	5.36364	12.6364	11	2.5	1	11	13.3333	7.81818	3.18182	1.5	#DIV/0!	3.33333	5.25	5.625	6.63636	2.44444	1	4	5.66667
Grb10	13		Mean	2.88462	0	89.4231	7.69231	0.894231	8	0.230769	0	7.15385	0.615385	0.916209	413.824	#DIV/0!	427.487	394.5	157.354	132.587	522.833	264.821	245.576	644.833	764.338	801.442	388	48	17.9231	26.1538	5.66667	13.7692	11.3077	6.375	2	3.5	21.4545	7.76923	4.6	1.5	#DIV/0!	#DIV/0!	7.54545	6.3	7.15385	6.42857	2	3	12.9
			SE	1.52459	0	5.13254	4.40112	0.0513254	0	0.121967	0	0.410603	0.352089	0.0466449	137.411	#DIV/0!	138.453	164.367	43.6123	66.9431	37.4392	156.738	171.983	22.7484	132.946	140.606	61.2933	5.42294	1.58974	3.1748	1.2081	1.45398	0.603023	0.517375	#DIV/0!	2.11058	2.44019	0.121967	0.600275	0.213201	#DIV/0!	0.348155	1.13675	1.30869	0.410603	0.56631	#DIV/0!	0.797724	1.3568
			SE	1.52033	0	4.44116	3.33087	0.0444116	0	0.121626	0	0.355292	0.266469	0.0376308	121.884	#DIV/0!	123.052	85.8292	38.7184	36.7545	135.848	117.511	107.79	304.96	87.9542	88.4887	88.0059	10.3972	4.65263	6.4419	1.62315	2.64127	1.87215	2.1429	0.392232	0.196116	7.1837	0.121626	2.02632	0.196116	#DIV/0!	#DIV/0!	2.8267	2.74578	0.355292	2.11137	0.392232	0	4.76535
Choice - B2
GB0	29	WT	E0	0	0	100	0	1	8	0	0	8	0	1	378.125	.	378.125	.	81.375	81.375	.	913	913	.	130.75	130.75	.	38	15	18	5	12	11	1	.	.	14	8	3	.	.	.	4	4	8	1	.	.	5
GB1	36	WT	E0	75	12.5	0	12.5	0	8	6	1	0	1	0	2324	1468	.	3180	471	.	471	77	.	77	296	.	296	4	2	.	2	3	1	.	.	.	.	2	.	.	.	.	.	.	.	.	.	.	.
GF0	34	WT	E0	87.5	0	0	12.5	0	8	7	0	0	1	0	2957	.	.	2957	1580	.	1580	258	.	258	322	.	322	6	3	1	2	1	3	.	.	.	2	1	2	.	.	.	.	.	.	.	.	.	1
GF1	34	WT	E0	12.5	0	50	37.5	0.5	8	1	0	4	3	0.571429	1260.29	.	1686.25	692.333	535.286	606.75	440	99.4286	98.75	100.333	576.429	776.25	310	19	8	6	5	11	7	.	.	.	1	7	.	.	.	.	1	2	4	.	.	.	.
GC0	36	+ve	E0	0	0	75	25	0.75	8	0	0	6	2	0.75	557.5	.	338.333	1215	342.625	275.667	543.5	141	137	153	936.25	1113.5	404.5	45	13	20	12	17	8	3	.	.	17	8	.	.	.	.	5	6	6	2	.	.	6
GC1	35	WT	E0	0	0	75	25	0.75	8	0	0	6	2	0.75	640	.	760.167	279.5	252.25	228.5	323.5	117.625	118.167	116	238.25	226.833	272.5	34	12	17	5	12	12	7	.	.	3	8	4	.	.	.	.	4	6	4	.	.	3
GC2	34	+ve	E0	25	0	50	25	0.5	8	2	0	4	2	0.666667	366.5	.	426.5	246.5	96	77.75	132.5	230.167	87.75	515	870.333	1108	395	25	11	10	4	6	7	1	.	.	11	6	1	1	.	.	3	.	4	.	.	.	6
GC3	29	+ve	E0	0	0	100	0	1	8	0	0	8	0	1	178.875	.	178.875	.	51.375	51.375	.	68.125	68.125	.	1020.38	1020.38	.	40	13	27	.	8	11	17	.	.	4	8	3	.	.	.	2	.	8	17	.	.	2
GE0	29	+ve	E0	0	0	100	0	1	8	0	0	8	0	1	369.125	.	369.125	.	70.875	70.875	.	139.875	139.875	.	413.125	413.125	.	42	15	22	5	9	10	4	.	1	18	8	2	.	.	1	4	1	8	4	.	.	9
GE1	29	+ve	E0	0	0	100	0	1	8	0	0	8	0	1	273.25	.	273.25	.	154	154	.	201.125	201.125	.	574.75	574.75	.	26	16	10	.	9	12	1	.	.	4	8	4	.	.	.	4	1	8	1	.	.	.
GE2	34	WT	E0	12.5	12.5	62.5	12.5	0.625	8	1	1	5	1	0.833333	2271.71	3871	2159.2	1235	90.5	84.6	120	1992.67	1767.2	3120	38.6667	45.2	6	21	8	9	4	14	6	1	.	.	.	7	.	1	.	.	.	4	5	.	.	.	.
GE3	29	+ve	E0	0	0	87.5	12.5	0.875	8	0	0	7	1	0.875	181.125	.	187.143	139	141.75	113.143	342	1371.12	1556	77	409.375	420.571	331	20	10	8	2	9	9	1	.	1	.	8	1	.	.	1	.	1	7	.	.	.	.
GK1	37	WT	E0	50	12.5	25	12.5	0.25	8	4	1	2	1	0.666667	825.25	884	746.5	924	1617.67	1567.5	1718	203	264	81	638	811	292	29	8	13	8	5	6	6	1	2	9	4	3	.	.	.	1	1	2	5	1	2	2
GK2	27	WT	E0	0	0	87.5	12.5	0.875	8	0	0	7	1	0.875	382.875	.	430.857	47	140.375	105	388	247.75	261.857	149	23	20.1429	43	40	14	17	9	10	11	2	.	7	10	8	3	.	.	1	2	1	7	2	.	4	3
GK3	35	+ve	E0	0	0	100	0	1	8	0	0	8	0	1	1113.38	.	1113.38	.	74.125	74.125	.	198.5	198.5	.	631.25	631.25	.	20	8	9	3	12	8	.	.	.	.	8	.	.	.	.	.	1	8	.	.	.	.
GK4	29	+ve	E0	0	0	100	0	1	8	0	0	8	0	1	147.25	.	147.25	.	138.125	138.125	.	89.375	89.375	.	1007.38	1007.38	.	162	78	84	.	21	31	19	3	.	88	8	23	6	1	.	40	13	8	13	2	.	48
GA0	34	WT	E0	25	0	75	0	0.75	8	2	0	6	0	1	831.167	.	831.167	.	305.333	305.333	.	91.1667	91.1667	.	232.5	232.5	.	21	8	12	1	11	6	1	.	3	.	6	.	.	.	2	.	5	6	1	.	.	.
GA1	29	WT	E0	0	0	50	50	0.5	8	0	0	4	4	0.5	361.5	.	334.25	388.75	148.5	171	126	73.125	54.5	91.75	579	825	333	22	9	9	4	12	9	1	.	.	.	8	1	.	.	.	.	4	4	1	.	.	.
GA2	29	+ve	E0	12.5	0	62.5	25	0.625	8	1	0	5	2	0.714286	2172.71	.	2120.2	2304	551.571	458.4	784.5	1461.14	1709.8	839.5	25.4286	28	19	17	9	5	3	7	9	1	.	.	.	7	2	.	.	.	.	.	5	.	.	.	.
GJ1	37	+ve	E0	37.5	0	37.5	25	0.375	8	3	0	3	2	0.6	2512.2	.	2867.33	1979.5	1141	864.333	1556	1769.4	130	4228.5	342.4	525.667	67.5	18	5	6	7	10	5	1	.	.	2	5	.	.	.	.	.	3	3	.	.	.	.
GJ2	34	+ve	E0	37.5	0	62.5	0	0.625	8	3	0	5	0	1	934.4	.	934.4	.	156.4	156.4	.	113.2	113.2	.	654	654	.	31	11	17	3	17	7	1	.	.	6	5	2	.	.	.	4	10	5	1	.	.	1
GJ3	34	WT	E0	0	0	100	0	1	8	0	0	8	0	1	242.5	.	242.5	.	187.625	187.625	.	94.25	94.25	.	215.125	215.125	.	26	14	12	.	10	11	.	.	.	5	8	3	.	.	.	3	2	8	.	.	.	2
GG1	34	+ve	E0	50	0	37.5	12.5	0.375	8	4	0	3	1	0.75	1479.5	.	1468	1514	311	310.667	312	148.25	148.333	148	583.75	708.333	210	22	10	6	6	10	9	2	.	.	1	4	5	.	.	.	1	1	3	2	.	.	.
GG2	29	+ve	E0	37.5	0	62.5	0	0.625	8	3	0	5	0	1	625.4	.	625.4	.	205.6	205.6	.	287.2	287.2	.	726.2	726.2	.	16	5	11	.	6	5	4	.	.	1	5	.	.	.	.	.	1	5	4	.	.	1
WT	11		Mean	23.8636	3.40909	56.8182	15.9091	0.568182	8	1.90909	0.272727	4.54545	1.27273	0.654221	1134.04	2074.33	841.002	1212.95	491.81	370.854	645.812	378.819	406.988	499.135	299.065	364.756	234.312	23.6364	9.18182	11.4	4.5	9.18182	7.54545	2.71429	1	4	6.28571	6.09091	2.71429	1	#DIV/0!	1.5	2.2	3	5.55556	2.33333	1	3	2.66667
Grb10	13		Mean	15.3846	0	75	9.61538	0.75	8	1.23077	0	6	0.769231	0.873535	839.324	#DIV/0!	849.937	1233	264.188	226.958	611.75	478.345	374.329	993.5	630.355	687.011	237.833	37.2308	15.6923	18.0769	5	10.8462	10.0769	4.58333	3	1	15.2	6.76923	4.77778	3.5	1	1	7.875	3.8	6	5.5	2	#DIV/0!	10.4286
			SE	9.74891	1.76045	10.8402	4.79432	0.108402	0	0.779913	0.140836	0.867217	0.383546	0.110185	286.164	477.329	198.435	363.534	170.816	143.895	191.109	177.023	173.466	319.791	64.5425	101.959	39.5552	3.50395	1.29206	1.61558	0.768706	1.27078	1.08178	0.792279	#DIV/0!	0.797724	1.45346	0.779913	0.286794	#DIV/0!	#DIV/0!	0.213201	0.393123	0.452267	0.605113	0.528004	#DIV/0!	0.426401	0.411943
			SE	5.32476	0	6.78776	3.21313	0.0678776	0	0.425981	0	0.543021	0.25705	0.0427765	216.456	#DIV/0!	234.529	246.627	82.6205	62.1004	142.419	169.337	155.985	446.855	80.2762	87.6331	46.2161	10.7502	5.27377	5.81384	0.85485	1.29519	1.83436	1.7718	#DIV/0!	0	7.3039	0.425981	1.93041	0.980581	#DIV/0!	0	3.61753	1.22509	0.543021	1.68379	#DIV/0!	#DIV/0!	4.67085
Choice - B3
GB0	29	WT	E0	12.5	0	87.5	0	0.875	8	1	0	7	0	1	440.571	.	440.571	.	68	68	.	879.143	879.143	.	121.429	121.429	.	28	9	16	3	16	7	1	.	.	4	7	.	.	.	.	2	8	7	1	.	.	.
GB1	36	WT	E0	62.5	12.5	12.5	12.5	0.125	8	5	1	1	1	0.5	1142.33	1077	2095	255	508	168	848	798	92	1504	535	1056	14	9	4	2	3	6	3	.	.	.	.	3	1	.	.	.	.	1	1	.	.	.	.
GF0	34	WT	E0	75	0	25	0	0.25	8	6	0	2	0	1	1594.5	.	1594.5	.	339.5	339.5	.	1191.5	1191.5	.	25	25	.	7	3	3	1	3	3	1	.	.	.	2	1	.	.	.	.	.	2	1	.	.	.
GF1	34	WT	E0	50	0	37.5	12.5	0.375	8	4	0	3	1	0.75	518.25	.	556.667	403	599.25	187.667	1834	5950.75	7494	1321	534.5	602.667	330	17	7	7	3	6	4	.	.	5	2	4	.	.	.	3	.	1	3	.	.	2	1
GC0	36	+ve	E0	100	0	0	0	0	8	8	0	0	0	0	.	.	.	.	.	.	.	.	.	.	.	.	.	33	7	12	14	7	.	.	.	.	26	.	.	.	.	.	7	4	.	.	.	.	8
GC1	35	WT	E0	0	12.5	75	12.5	0.75	8	0	1	6	1	0.857143	1155.12	1324	670.667	3893	330.286	343.667	250	206.714	218	139	96.4286	84.3333	169	15	8	6	1	8	7	.	.	.	.	8	.	.	.	.	.	.	6	.	.	.	.
GC2	34	+ve	E0	50	0	37.5	12.5	0.375	8	4	0	3	1	0.75	2159.5	.	2516	1090	546.25	696.667	95	2566.25	2770	1955	170.5	114.333	339	15	7	6	2	6	6	.	1	1	1	4	2	.	.	.	1	1	3	.	1	1	.
GC3	29	+ve	E0	0	0	100	0	1	8	0	0	8	0	1	648.625	.	648.625	.	113.125	113.125	.	100.75	100.75	.	547.5	547.5	.	28	11	17	.	8	11	9	.	.	.	8	3	.	.	.	.	.	8	9	.	.	.
GE0	29	+ve	E0	0	0	87.5	12.5	0.875	8	0	0	7	1	0.875	760.5	.	780.286	622	149.125	136.286	239	173	174.429	163	319.25	341.286	165	19	8	9	2	9	8	1	.	1	.	8	.	.	.	.	.	1	7	1	.	.	.
GE1	29	+ve	E0	0	12.5	62.5	25	0.625	8	0	1	5	2	0.714286	577.875	75	626.8	707	265.571	90	704.5	83.1429	36.8	199	490.571	586	252	18	9	5	4	8	8	2	.	.	.	8	1	.	.	.	.	.	5	.	.	.	.
GE2	34	WT	E0	62.5	0	12.5	25	0.125	8	5	0	1	2	0.333333	503.667	.	81	715	106	27	145.5	617.667	651	601	110	20	155	12	3	3	6	9	3	.	.	.	.	3	.	.	.	.	.	2	1	.	.	.	.
GE3	29	+ve	E0	12.5	0	87.5	0	0.875	8	1	0	7	0	1	962.571	.	962.571	.	137.571	137.571	.	661.143	661.143	.	532.571	532.571	.	19	10	9	.	8	10	.	.	.	1	7	3	.	.	.	.	1	7	.	.	.	1
GK1	37	WT	E0	100	0	0	0	0	8	8	0	0	0	0	.	.	.	.	.	.	.	.	.	.	.	.	.	12	2	3	7	4	.	.	.	.	8	.	.	.	.	.	2	.	.	.	.	.	3
GK2	27	WT	E0	0	12.5	50	37.5	0.5	8	0	1	4	3	0.571429	637.5	154	1067.25	225.667	228.571	150.25	333	307.857	418.25	160.667	33.8571	32.5	35.6667	35	15	13	7	10	11	1	.	.	13	8	4	.	.	.	3	1	4	1	.	.	7
GK3	35	+ve	E0	75	0	12.5	12.5	0.125	8	6	0	1	1	0.5	2221	.	3996	446	186	255	117	2685.5	4214	1157	407.5	85	730	8	2	3	3	5	2	.	.	.	1	2	.	.	.	.	.	2	1	.	.	.	.
GK4	29	+ve	E0	0	0	100	0	1	8	0	0	8	0	1	405	.	405	.	268.625	268.625	.	107.625	107.625	.	806.375	806.375	.	101	61	40	.	11	45	25	9	.	11	8	37	8	1	.	7	3	8	17	8	.	4
GA0	34	WT	E0	12.5	0	87.5	0	0.875	8	1	0	7	0	1	843.571	.	843.571	.	311.714	311.714	.	116.714	116.714	.	401	401	.	26	8	15	3	13	8	1	.	.	4	7	1	.	.	.	.	6	7	1	.	.	1
GA1	29	WT	E0	0	0	100	0	1	8	0	0	8	0	1	816.75	.	816.75	.	253.375	253.375	.	64.625	64.625	.	853	853	.	28	11	15	2	16	10	1	.	.	1	8	2	.	.	.	1	6	8	1	.	.	.
GA2	29	+ve	E0	62.5	0	25	12.5	0.25	8	5	0	2	1	0.666667	542.333	.	662	303	350	295.5	459	1222.33	1472.5	722	23	29	11	10	6	3	1	3	5	1	.	.	1	3	2	.	.	.	1	.	2	1	.	.	.
GJ1	37	+ve	E0	62.5	12.5	25	0	0.25	8	5	1	2	0	1	1491	1987	1243	.	980.5	980.5	.	1275	1275	.	26.5	26.5	.	12	4	7	1	6	3	1	.	.	2	3	1	.	.	.	.	3	2	1	.	.	1
GJ2	34	+ve	E0	25	12.5	37.5	25	0.375	8	2	1	3	2	0.6	1110.5	1062	463	2106	368.4	327.333	430	208.2	266.333	121	301.2	404	147	37	10	21	6	16	7	4	2	.	8	6	2	.	.	.	2	8	3	3	2	.	5
GJ3	34	WT	E0	25	12.5	50	12.5	0.5	8	2	1	4	1	0.8	1838.17	3487	1388.75	1987	424.6	141.5	1557	91.6	87	110	204.8	241	60	16	6	7	3	11	5	.	.	.	.	6	.	.	.	.	.	3	4	.	.	.	.
GG1	34	+ve	E0	62.5	0	37.5	0	0.375	8	5	0	3	0	1	1175.33	.	1175.33	.	98	98	.	777.333	777.333	.	529.333	529.333	.	11	3	5	3	6	3	2	.	.	.	3	.	.	.	.	.	.	3	2	.	.	.
GG2	29	+ve	E0	75	12.5	12.5	0	0.125	8	6	1	1	0	1	2435	948	3922	.	352	352	.	897	897	.	357	357	.	9	3	6	.	5	2	.	.	.	2	2	1	.	.	.	.	3	1	.	.	.	2
WT	11		Mean	36.3636	4.54545	48.8636	10.2273	0.488636	8	2.90909	0.363636	3.90909	0.818182	0.710173	949.043	1510.5	955.473	1246.44	316.93	199.067	827.917	1022.46	1121.22	639.278	291.501	343.693	127.278	18.6364	6.90909	8.18182	3.54545	9.27273	6.1	1	#DIV/0!	5	5.33333	5.6	1.8	#DIV/0!	#DIV/0!	3	2	3.5	4.3	1	#DIV/0!	2	3
Grb10	13		Mean	40.3846	3.84615	48.0769	7.69231	0.480769	8	3.23077	0.307692	3.84615	0.615385	0.777381	1207.44	1018	1450.05	879	317.931	312.551	340.75	896.44	1062.74	719.5	375.942	363.242	274	24.6154	10.8462	11	4	7.53846	9.16667	5.625	4	1	5.88889	5.16667	5.77778	8	1	#DIV/0!	3.6	2.88889	4.16667	4.85714	3.66667	1	3.5
			SE	10.5871	1.9015	10.4521	3.69973	0.104521	0	0.846968	0.15212	0.836166	0.295979	0.0989504	144.08	425.311	180.035	438.416	49.9317	33.3102	216.954	534.958	685.059	189.422	83.5121	113.152	35.5109	2.75771	1.17902	1.66142	0.651762	1.34226	0.892732	0	#DIV/0!	#DIV/0!	1.3439	0.713506	0.393123	#DIV/0!	#DIV/0!	#DIV/0!	0.246183	0.837436	0.779147	0	#DIV/0!	#DIV/0!	0.852803
			SE	9.82151	1.66543	9.79008	2.66238	0.0979008	0	0.785721	0.133235	0.783206	0.21299	0.081516	197.645	216.916	360.076	182.502	68.4382	74.7035	65.053	253.947	351.241	202.169	63.4082	70.1082	69.04	6.8627	4.259	2.83296	1.1266	0.903096	3.24055	2.29638	1.20894	0	2.32232	0.70793	3.25452	#DIV/0!	#DIV/0!	#DIV/0!	0.868243	0.611499	0.746398	1.68271	1.05003	#DIV/0!	0.759555
LAST -1
Choice - B1
GB0	33	WT	E0	0	0	100	0	1	8	0	0	8	0	1	390.75	.	390.75	.	173.125	173.125	.	1039.38	1039.38	.	165.125	165.125	.	48	22	17	9	14	11	1	.	.	22	8	3	.	.	.	11	6	8	1	.	.	2
GB1	35	WT	E0	37.5	12.5	25	25	0.25	8	3	1	2	2	0.5	1002.6	454	1326	953.5	801.75	881.5	722	101	76.5	125.5	654	958.5	349.5	18	11	4	3	6	8	2	.	.	2	5	4	2	.	.	.	.	2	.	.	.	2
GF0	34	WT	E0	37.5	0	25	37.5	0.25	8	3	0	2	3	0.4	810.2	.	1090	623.667	267.6	344.5	216.333	407.6	666.5	235	130.4	93	155.333	20	6	9	5	12	5	2	.	.	1	5	.	1	.	.	.	6	2	1	.	.	.
GF1	33	WT	E0	0	0	87.5	12.5	0.875	8	0	0	7	1	0.875	285.75	.	303.571	161	159.375	162.286	139	82.875	75.4286	135	1129	1224.71	459	28	15	9	4	9	8	.	.	.	11	8	.	.	.	.	7	1	7	.	.	.	1
GC0	28	+ve	E0	0	0	37.5	62.5	0.375	8	0	0	3	5	0.375	1154.62	.	2206.67	523.4	421	140.333	589.4	135.375	92	161.4	731.625	1154.67	477.8	63	22	24	17	27	10	5	.	.	21	8	2	4	.	.	8	11	3	.	.	.	10
GC1	28	WT	E0	0	12.5	37.5	50	0.375	8	0	1	3	4	0.428571	725.375	1788	463	656.5	303.429	166.667	406	137.857	104.667	162.75	277.571	390.667	192.75	49	28	13	8	12	23	6	.	.	8	8	16	4	.	.	.	4	3	1	.	.	5
GC2	28	+ve	E0	0	0	100	0	1	8	0	0	8	0	1	365.75	.	365.75	.	57.75	57.75	.	616	616	.	544.125	544.125	.	24	11	11	2	8	11	1	.	.	4	8	3	.	.	.	.	.	8	1	.	.	2
GC3	33	+ve	E0	0	0	100	0	1	8	0	0	8	0	1	168	.	168	.	39.25	39.25	.	81.875	81.875	.	1109.5	1109.5	.	40	9	31	.	11	9	19	1	.	.	8	1	.	.	.	.	3	8	19	1	.	.
GE0	28	+ve	E0	0	0	87.5	12.5	0.875	8	0	0	7	1	0.875	372.875	.	405.143	147	190.875	172	323	104.25	108.714	73	263.5	269.286	223	38	14	18	6	9	10	4	1	3	11	8	2	.	.	2	2	1	7	3	.	.	7
GE1	36	+ve	E0	0	0	100	0	1	8	0	0	8	0	1	93.75	.	93.75	.	100	100	.	213.875	213.875	.	562.125	562.125	.	28	12	15	1	10	9	1	.	.	8	8	1	.	.	.	3	2	8	1	.	.	4
GE2	26	WT	E0	0	0	87.5	12.5	0.875	8	0	0	7	1	0.875	868	.	790.143	1413	144.25	77	615	1141	1260.43	305	22.375	21.7143	27	32	10	19	3	19	9	1	.	.	3	8	1	1	.	.	.	9	7	.	.	.	3
GE3	34	+ve	E0	0	0	100	0	1	8	0	0	8	0	1	203.875	.	203.875	.	66.375	66.375	.	1478.75	1478.75	.	166.875	166.875	.	34	10	24	.	13	8	.	.	3	10	8	.	.	.	1	1	5	8	.	.	2	9
GK1	28	WT	E0	0	0	62.5	37.5	0.625	8	0	0	5	3	0.625	316.375	.	343.2	271.667	309.25	183.8	518.333	85.625	63.4	122.667	766.125	953.4	454	52	19	15	18	10	13	8	.	.	21	8	5	.	.	.	6	.	5	4	.	.	6
GK2	33	WT	E0	0	0	62.5	37.5	0.625	8	0	0	5	3	0.625	324.5	.	328.4	318	123.375	92.6	174.667	382	533.2	130	31.5	33.8	27.6667	72	25	34	13	9	13	8	2	6	34	8	5	2	.	2	8	1	5	5	2	.	21
GK3	28	+ve	E0	0	0	100	0	1	8	0	0	8	0	1	170.625	.	170.625	.	81.625	81.625	.	197.75	197.75	.	888	888	.	43	18	24	1	10	9	.	.	.	24	8	1	.	.	.	9	2	8	.	.	.	14
GK4	28	+ve	E0	0	0	100	0	1	8	0	0	8	0	1	121.375	.	121.375	.	203.25	203.25	.	129	129	.	852.375	852.375	.	180	74	106	.	23	37	21	12	.	87	8	29	4	.	.	33	15	8	17	12	.	54
GA0	36	WT	E0	0	0	100	0	1	8	0	0	8	0	1	305.875	.	305.875	.	230.75	230.75	.	96.625	96.625	.	128.875	128.875	.	42	17	24	1	14	8	.	.	10	10	8	.	.	.	5	4	6	8	.	.	4	6
GA1	33	WT	E0	0	0	75	25	0.75	8	0	0	6	2	0.75	175.625	.	194.667	118.5	57.75	51.1667	77.5	48.875	40.6667	73.5	669	798.333	281	33	15	16	2	8	11	1	.	.	13	8	3	1	.	.	3	.	6	.	.	.	10
GA2	33	+ve	E0	0	0	87.5	12.5	0.875	8	0	0	7	1	0.875	380.75	.	353.429	572	117.625	74.7143	418	894.5	944.429	545	30.75	30.5714	32	34	15	16	3	10	8	1	.	.	15	8	.	1	.	.	6	2	7	.	.	.	7
GJ1	33	+ve	E0	0	12.5	50	37.5	0.5	8	0	1	4	3	0.571429	616.375	419	774	472	553.429	866.25	136.333	71.4286	80.5	59.3333	713.571	956.5	389.667	19	9	5	5	10	8	.	.	.	1	8	1	.	.	.	.	1	4	.	.	.	.
GJ2	28	+ve	E0	12.5	0	75	12.5	0.75	8	1	0	6	1	0.857143	646.714	.	657.667	581	131.143	141.667	68	251.857	234	359	733.143	818.167	223	46	12	31	3	19	9	2	.	.	16	7	2	.	.	.	3	10	6	2	.	.	13
GJ3	-1	WT	E0	0	0	87.5	12.5	0.875	8	0	0	7	1	0.875	253.125	.	250	275	59.625	58	71	108.25	107.571	113	85.25	89.7143	54	35	12	21	2	13	8	2	.	8	4	8	.	1	.	3	.	5	7	1	.	5	3
GG1	10	+ve	E0	12.5	0	87.5	0	0.875	8	1	0	7	0	1	573.143	.	573.143	.	157.857	157.857	.	138.429	138.429	.	720.857	720.857	.	43	14	23	6	11	10	1	.	.	21	7	3	.	.	.	4	1	7	1	.	.	14
GG2	12	+ve	E0	0	0	100	0	1	8	0	0	8	0	1	175.375	.	175.375	.	103.5	103.5	.	120.5	120.5	.	945.875	945.875	.	57	21	36	.	15	12	3	.	.	27	8	4	.	.	.	9	7	8	3	.	.	18
WT	11		Mean	6.81818	2.27273	68.1818	22.7273	0.681818	8	0.545455	0.181818	5.45455	1.81818	0.723052	496.198	1121	525.964	532.315	239.116	220.127	326.648	330.098	369.487	155.824	369.02	441.622	222.25	39	16.3636	16.4545	6.18182	11.4545	10.6364	3.44444	2	8	11.7273	7.45455	5.28571	1.71429	#DIV/0!	3.33333	6.5	4.75	5.45455	2.16667	2	4.5	5.9
Grb10	12		Mean	1.92308	0.961538	86.5385	10.5769	0.865385	8	0.153846	0.0769231	6.92308	0.846154	0.888736	387.941	419	482.215	459.08	171.052	169.582	306.947	341.045	341.217	239.547	635.563	693.763	269.093	49.9231	18.5385	28	4.88889	13.5385	11.5385	5.8	4.66667	3	20.4167	7.84615	4.45455	3	#DIV/0!	1.5	7.8	5	6.92308	5.875	6.5	2	13.8182
			SE	4.57378	1.52459	8.48857	5.00516	0.0848857	0	0.365902	0.121967	0.679085	0.400413	0.066295	88.4769	284.41	113.076	129.069	62.1372	70.9872	73.8857	119.182	132.968	21.4001	112.234	135.996	52.1192	4.74054	2.01933	2.47299	1.61143	1.08178	1.4351	0.905929	#DIV/0!	0.603023	3.09278	0.365902	1.48441	0.335491	#DIV/0!	0.460566	0.868646	0.817821	0.679085	0.553227	#DIV/0!	0.213201	1.78914
			SE	1.35509	1.0008	5.97694	5.48161	0.0597694	0	0.108407	0.0800641	0.478155	0.438529	0.0568271	86.3734	#DIV/0!	162.074	51.904	43.582	62.0454	60.9943	120.584	122.699	60.1893	91.3405	103.222	49.6989	11.8172	4.96182	7.20243	1.42481	1.70219	2.23487	2.20185	1.83333	0	6.4766	0.108407	2.36771	0.5	#DIV/0!	0.204124	2.69017	1.35959	0.478155	2.17911	2.24537	#DIV/0!	4.08211
Choice - B2
GB0	33	WT	E0	0	0	100	0	1	8	0	0	8	0	1	852.875	.	852.875	.	160.625	160.625	.	2011.5	2011.5	.	79.375	79.375	.	39	12	17	10	15	11	3	.	3	7	8	3	.	.	.	1	6	8	3	.	.	.
GB1	35	WT	E0	37.5	12.5	50	0	0.5	8	3	1	4	0	1	1986.6	1960	1993.25	.	574.25	574.25	.	80.5	80.5	.	918	918	.	10	6	4	.	5	5	.	.	.	.	5	1	.	.	.	.	.	4	.	.	.	.
GF0	34	WT	E0	87.5	0	12.5	0	0.125	8	7	0	1	0	1	2668	.	2668	.	206	206	.	1115	1115	.	29	29	.	4	2	2	.	2	2	.	.	.	.	1	1	.	.	.	.	1	1	.	.	.	.
GF1	33	WT	E0	50	25	25	0	0.25	8	4	2	2	0	1	1728.5	1382.5	2074.5	.	148	148	.	2305.5	2305.5	.	650	650	.	9	6	2	1	5	3	.	.	.	1	4	1	.	.	.	1	.	2	.	.	.	.
GC0	28	+ve	E0	25	12.5	12.5	50	0.125	8	2	1	1	4	0.2	2072.17	2197	1443	2198.25	860.2	620	920.25	137.6	95	148.25	503.4	916	400.25	44	18	7	19	13	11	2	.	.	18	6	6	.	.	.	6	3	1	.	.	.	3
GC1	28	WT	E0	0	0	75	25	0.75	8	0	0	6	2	0.75	732.25	.	691.5	854.5	313.625	257.833	481	117.25	108.5	143.5	247.375	262.667	201.5	42	13	25	4	9	11	5	.	.	17	8	3	.	.	.	2	1	6	3	.	.	15
GC2	28	+ve	E0	50	0	50	0	0.5	8	4	0	4	0	1	1637.25	.	1637.25	.	160.5	160.5	.	508.5	508.5	.	691.5	691.5	.	8	4	4	.	4	4	.	.	.	.	4	.	.	.	.	.	.	4	.	.	.	.
GC3	33	+ve	E0	0	0	100	0	1	8	0	0	8	0	1	454.5	.	454.5	.	49.25	49.25	.	77.5	77.5	.	1022.25	1022.25	.	41	10	31	.	15	9	15	1	.	1	8	1	.	.	.	1	7	8	15	1	.	.
GE0	28	+ve	E0	0	0	87.5	12.5	0.875	8	0	0	7	1	0.875	371	.	401	161	176.125	152.429	342	119.125	116.286	139	172.5	164.571	228	28	10	13	5	8	8	3	.	.	9	8	.	.	.	.	2	.	7	3	.	.	3
GE1	36	+ve	E0	0	0	100	0	1	8	0	0	8	0	1	210.25	.	210.25	.	73.5	73.5	.	24.875	24.875	.	620.25	620.25	.	26	11	12	3	9	11	1	.	.	5	8	3	.	.	.	.	1	8	1	.	.	2
GE2	26	WT	E0	12.5	0	75	12.5	0.75	8	1	0	6	1	0.857143	1542.29	.	1494	1832	148.714	103.667	419	1278.29	1444.5	281	27.7143	27.8333	27	32	13	14	5	19	11	1	.	.	1	7	4	1	.	.	1	8	6	.	.	.	.
GE3	34	+ve	E0	0	0	87.5	12.5	0.875	8	0	0	7	1	0.875	374.25	.	125.857	2113	164.5	158.571	206	594.75	668.714	77	511.125	540.286	307	22	13	8	1	8	11	1	2	.	.	8	3	1	1	.	.	.	7	.	1	.	.
GK1	28	WT	E0	100	0	0	0	0	8	8	0	0	0	0	.	.	.	.	.	.	.	.	.	.	.	.	.	24	2	3	19	3	.	.	.	.	21	.	.	.	.	.	2	.	.	.	.	.	3
GK2	33	WT	E0	0	0	37.5	62.5	0.375	8	0	0	3	5	0.375	559.375	.	149.667	805.2	221.5	85.6667	303	211.125	230.667	199.4	38	19.3333	49.2	61	24	20	17	11	17	5	1	4	23	8	9	1	.	.	6	2	3	2	1	3	9
GK3	28	+ve	E0	0	0	100	0	1	8	0	0	8	0	1	543.625	.	543.625	.	70.625	70.625	.	340.5	340.5	.	646	646	.	28	11	16	1	15	9	1	.	.	3	8	1	.	.	.	2	6	8	1	.	.	1
GK4	28	+ve	E0	0	0	100	0	1	8	0	0	8	0	1	132.625	.	132.625	.	170.375	170.375	.	134.25	134.25	.	868.5	868.5	.	106	42	64	.	13	26	16	7	3	41	8	18	2	.	.	14	5	8	14	7	3	27
GA0	36	WT	E0	0	0	100	0	1	8	0	0	8	0	1	358.625	.	358.625	.	189	189	.	65.375	65.375	.	213.375	213.375	.	48	20	25	3	16	9	1	.	5	17	8	1	.	.	2	9	8	8	1	.	3	5
GA1	33	WT	E0	0	0	87.5	12.5	0.875	8	0	0	7	1	0.875	426.625	.	235.143	1767	59.5	51.8571	113	57.25	53.2857	85	737.25	803.857	271	26	12	11	3	10	10	1	.	.	5	8	2	.	.	.	2	2	7	1	.	.	1
GA2	33	+ve	E0	0	0	100	0	1	8	0	0	8	0	1	310.125	.	310.125	.	189.5	189.5	.	1369.62	1369.62	.	21.625	21.625	.	24	10	14	.	8	8	1	.	.	7	8	.	.	.	.	2	.	8	1	.	.	5
GJ1	33	+ve	E0	87.5	12.5	0	0	0	8	7	1	0	0	0	1045	1045	.	.	.	.	.	.	.	.	.	.	.	3	2	1	.	2	.	.	.	.	1	1	.	.	.	.	1	1	.	.	.	.	.
GJ2	28	+ve	E0	12.5	0	62.5	25	0.625	8	1	0	5	2	0.714286	1287.57	.	1490.6	780	265.286	302	173.5	149	143.6	162.5	673.857	843.2	250.5	44	15	26	3	20	12	5	.	.	7	7	5	1	.	.	2	13	5	4	.	.	4
GJ3	-1	WT	E0	0	0	62.5	37.5	0.625	8	0	0	5	3	0.625	261.5	.	261	262.333	65.375	61.6	71.6667	203.75	213.2	188	61.75	62.8	60	44	15	23	6	16	9	3	.	1	15	8	1	1	.	.	5	7	5	2	.	1	8
GG1	10	+ve	E0	50	12.5	37.5	0	0.375	8	4	1	3	0	1	1310.5	68	1724.67	.	59.6667	59.6667	.	285	285	.	501.333	501.333	.	13	4	3	6	5	3	.	.	.	5	4	.	.	.	.	.	.	3	.	.	.	.
GG2	12	+ve	E0	12.5	0	87.5	0	0.875	8	1	0	7	0	1	849.429	.	849.429	.	275.286	275.286	.	128.429	128.429	.	681.429	681.429	.	24	12	12	.	10	10	1	.	.	3	7	3	.	.	.	2	3	7	1	.	.	1
WT	11		Mean	26.1364	3.40909	56.8182	13.6364	0.568182	8	2.09091	0.272727	4.54545	1.09091	0.771104	1111.66	1671.25	1077.86	1104.21	208.659	183.85	277.533	744.554	762.803	179.38	300.184	306.624	121.74	30.8182	11.3636	13.2727	7.55556	10.0909	8.8	2.71429	1	3.25	11.8889	6.5	2.6	1	#DIV/0!	2	3.22222	4.375	5	2	1	2.33333	6.83333
Grb10	12		Mean	18.2692	2.88462	71.1538	7.69231	0.711538	8	1.46154	0.230769	5.69231	0.615385	0.82033	815.253	1103.33	776.911	1313.06	209.568	190.142	410.438	322.429	324.357	131.688	576.147	626.412	296.438	31.6154	12.4615	16.2308	5.42857	10	10.1667	4.6	3.33333	3	9.09091	6.53846	5	1.33333	1	#DIV/0!	3.55556	4.875	6.16667	5	3	3	5.75
			SE	11.3636	2.43723	10.4397	6.18249	0.104397	0	0.909091	0.194978	0.835177	0.494599	0.0978615	246.771	123.123	275.041	203.91	44.6753	45.9099	54.671	262.255	265.844	21.8448	101.879	105.313	32.575	5.45364	2.10313	2.82872	1.943	1.7656	1.33938	0.542561	#DIV/0!	0.514929	2.56038	0.728219	0.754783	0	#DIV/0!	#DIV/0!	0.849837	0.952611	0.738549	0.26968	#DIV/0!	0.348155	1.50655
Choice - B3
GB0	33	WT	E0	25	0	50	25	0.5	8	2	0	4	2	0.666667	1162.83	.	1482.25	524	264.5	220.25	353	514.667	664.5	215	161.833	128	229.5	23	10	6	7	8	6	3	.	.	6	6	.	2	.	.	2	2	4	.	.	.	.
GB1	33	WT	E0	62.5	0	25	12.5	0.25	8	5	0	2	1	0.666667	2077	.	1466	3299	1151.67	775	1905	3408	88	10048	569.333	829	50	7	3	3	1	3	3	1	.	.	.	3	.	.	.	.	.	.	2	1	.	.	.
GF0	35	WT	E0	75	0	0	25	0	8	6	0	0	2	0	1861	.	.	1861	122.5	.	122.5	386.5	.	386.5	103.5	.	103.5	10	3	2	5	5	2	.	.	.	3	2	.	.	.	.	1	.	.	.	.	.	2
GF1	34	WT	E0	62.5	0	25	12.5	0.25	8	5	0	2	1	0.666667	632.667	.	625	648	443	224	881	3398.33	3723.5	2748	435.333	643	20	16	7	2	7	3	5	1	.	2	5	3	2	.	.	.	2	.	2	.	.	.	.
GC0	33	+ve	E0	75	12.5	12.5	0	0.125	8	6	1	1	0	1	1832	810	2854	.	365	365	.	170	170	.	811	811	.	33	13	5	15	12	3	.	.	.	18	2	2	.	.	.	9	.	1	.	.	.	4
GC1	28	WT	E0	25	0	75	0	0.75	8	2	0	6	0	1	874.333	.	874.333	.	300	300	.	135.833	135.833	.	262.667	262.667	.	28	12	15	1	10	11	1	.	.	6	6	5	.	.	.	1	4	6	1	.	.	4
GC2	28	+ve	E0	12.5	0	75	12.5	0.75	8	1	0	6	1	0.857143	1084.14	.	1115	899	300.714	58.5	1754	4058.29	4157.5	3463	51.7143	52.3333	48	18	7	8	3	9	7	1	.	.	1	7	.	.	.	.	.	.	6	1	.	.	1
GC3	28	+ve	E0	0	0	100	0	1	8	0	0	8	0	1	569.625	.	569.625	.	55.25	55.25	.	82.125	82.125	.	931.625	931.625	.	33	10	23	.	8	10	14	1	.	.	8	2	.	.	.	.	.	8	14	1	.	.
GE0	33	+ve	E0	0	0	87.5	12.5	0.875	8	0	0	7	1	0.875	582.5	.	471.143	1362	317.375	342.857	139	160.125	105	546	151.5	150.429	159	25	9	13	3	9	9	2	.	.	5	8	1	.	.	.	.	.	7	2	.	.	4
GE1	28	+ve	E0	0	0	100	0	1	8	0	0	8	0	1	498.5	.	498.5	.	136.25	136.25	.	49.875	49.875	.	521.125	521.125	.	23	10	13	.	10	10	3	.	.	.	8	2	.	.	.	.	2	8	3	.	.	.
GE2	36	WT	E0	50	0	25	25	0.25	8	4	0	2	2	0.5	1988	.	2460.5	1515.5	144.25	38	250.5	957.25	812.5	1102	23	36	10	21	7	5	9	9	4	1	.	6	1	4	.	1	.	2	.	1	2	.	.	1	1
GE3	26	+ve	E0	25	0	75	0	0.75	8	2	0	6	0	1	891.167	.	891.167	.	141	141	.	489.5	489.5	.	582.5	582.5	.	16	7	9	.	7	7	2	.	.	.	6	1	.	.	.	.	1	6	2	.	.	.
GK1	34	WT	E0	50	12.5	25	12.5	0.25	8	4	1	2	1	0.666667	1622.75	2961	1009	1512	727.333	141.5	1899	310.667	371.5	189	547	684.5	272	26	9	9	8	10	7	1	.	.	8	4	4	.	.	.	1	3	2	1	.	.	3
GK2	28	WT	E0	12.5	0	62.5	25	0.625	8	1	0	5	2	0.714286	227.857	.	129.8	473	114.857	114	117	190.143	205.2	152.5	38.2857	29	61.5	62	23	23	16	16	11	4	.	7	24	7	4	.	.	1	11	5	5	4	.	5	4
GK3	33	+ve	E0	50	0	25	25	0.25	8	4	0	2	2	0.5	1592.25	.	1751.5	1433	145.25	49.5	241	5707	1896	9518	325.25	450.5	200	11	4	4	3	6	4	.	.	1	.	4	.	.	.	.	.	1	2	.	.	1	.
GK4	28	+ve	E0	0	0	100	0	1	8	0	0	8	0	1	197.75	.	197.75	.	166	166	.	151.625	151.625	.	835	835	.	72	28	44	.	10	28	29	4	1	.	8	20	.	.	.	.	2	8	29	4	1	.
GA0	28	WT	E0	0	0	87.5	12.5	0.875	8	0	0	7	1	0.875	1351.88	.	1502.14	300	332.875	366.714	96	145.625	158.429	56	205.5	200.429	241	24	13	10	1	10	13	1	.	.	.	8	5	.	.	.	.	2	7	1	.	.	.
GA1	36	WT	E0	0	0	87.5	12.5	0.875	8	0	0	7	1	0.875	170.875	.	186	65	76.125	81.1429	41	49.625	43.8571	90	828.75	912	246	24	10	13	1	13	9	1	.	.	1	8	1	.	.	.	1	5	7	1	.	.	.
GA2	33	+ve	E0	0	0	100	0	1	8	0	0	8	0	1	1198.88	.	1198.88	.	278.125	278.125	.	1351.25	1351.25	.	20.625	20.625	.	22	12	10	.	9	12	1	.	.	.	8	4	.	.	.	.	1	8	1	.	.	.
GJ1	33	+ve	E0	87.5	0	0	12.5	0	8	7	0	0	1	0	3127	.	.	3127	839	.	839	169	.	169	263	.	263	6	1	3	2	3	1	1	.	.	1	1	.	.	.	.	.	2	.	.	.	.	1
GJ2	33	+ve	E0	37.5	0	62.5	0	0.625	8	3	0	5	0	1	2249	.	2249	.	391.6	391.6	.	121.4	121.4	.	829	829	.	56	5	51	.	46	5	2	.	.	3	5	.	.	.	.	.	41	5	2	.	.	3
GJ3	28	WT	E0	0	0	100	0	1	8	0	0	8	0	1	278.625	.	278.625	.	124.875	124.875	.	169.25	169.25	.	102.75	102.75	.	21	8	13	.	11	8	1	.	.	1	8	.	.	.	.	.	3	8	1	.	.	1
GG1	-1	+ve	E0	87.5	12.5	0	0	0	8	7	1	0	0	0	3667	3667	.	.	.	.	.	.	.	.	.	.	.	7	3	2	2	4	2	.	.	.	1	1	2	.	.	.	.	2	.	.	.	.	.
GG2	10	+ve	E0	37.5	37.5	25	0	0.25	8	3	3	2	0	1	1941.4	2498	1106.5	.	340	340	.	864	864	.	310.5	310.5	.	11	8	3	.	6	4	.	.	.	1	5	2	.	.	.	1	1	2	.	.	.	.
WT	11		Mean	32.9545	1.13636	51.1364	14.7727	0.511364	8	2.63636	0.0909091	4.09091	1.18182	0.693723	1113.44	2961	1001.37	1133.06	345.635	238.548	629.444	878.718	637.257	1665.22	297.996	382.735	137.056	23.8182	9.54545	9.18182	5.6	8.90909	7.18182	1.5	#DIV/0!	5	6.11111	5.36364	3.5	1.5	#DIV/0!	1.5	2.71429	3.125	4.5	1.42857	#DIV/0!	3	2.5
Grb10	12		Mean	31.7308	4.80769	58.6538	4.80769	0.586538	8	2.53846	0.384615	4.69231	0.384615	0.787088	1494.71	2325	1173.01	1705.25	289.63	211.28	743.25	1114.52	858.025	3424	469.403	499.512	167.5	25.6154	9	14.4615	4.66667	10.6923	7.84615	6.11111	2.5	1	4.28571	5.46154	4	#DIV/0!	#DIV/0!	#DIV/0!	5	5.88889	5.54545	6.75	2.5	1	2.6
			SE	8.47334	1.13636	10.0361	2.82952	0.100361	0	0.677867	0.0909091	0.802887	0.226362	0.0839624	218.023	#DIV/0!	223.192	308.731	99.0254	64.4619	230.428	383.804	335.857	983.023	78.8297	104.174	32.6287	4.29761	1.65345	1.96246	1.47162	1.20947	1.07719	0.325669	#DIV/0!	0.797724	2.16608	0.677867	0.495434	0.213201	#DIV/0!	0.213201	1.11075	0.439525	0.728219	0.341882	#DIV/0!	0.852803	0.415605
			SE	9.8398	3.13833	11.6354	2.34709	0.116354	0	0.787184	0.251066	0.930835	0.187767	0.108549	303.427	414.634	235.74	282.024	58.9124	38.8344	213.968	529.979	361.481	1247.4	94.3212	95.8081	26.1029	5.59829	1.9329	4.5592	1.46818	3.14772	2.00294	2.74789	0.612372	0	1.80057	0.787184	1.75	#DIV/0!	#DIV/0!	#DIV/0!	1.63299	3.80363	0.778499	2.87746	0.612372	0	0.437798
LAST -2
Choice - B1
GB0	#REF!	WT	E0	0	0	87.5	12.5	0.875	8	0	0	7	1	0.875	885.875	.	592.286	2941	399.5	263	1355	827.375	887.714	405	73.75	69.2857	105	27	13	12	2	13	11	1	.	.	2	8	3	.	.	.	2	5	7	.	.	.	.
GB1	#REF!	WT	E0	37.5	12.5	37.5	12.5	0.375	8	3	1	3	1	0.75	1591.8	1601	1656	1390	708.75	789.667	466	95.5	96	94	587.25	671.667	334	22	13	4	5	8	12	.	.	.	2	5	8	.	.	.	.	1	3	.	.	.	.
GF0	#REF!	WT	E0	50	0	50	0	0.5	8	4	0	4	0	1	1040.5	.	1040.5	.	276.5	276.5	.	531.75	531.75	.	46.25	46.25	.	17	7	10	.	8	7	2	.	.	.	4	3	.	.	.	.	4	4	2	.	.	.
GF1	#REF!	WT	E0	0	0	87.5	12.5	0.875	8	0	0	7	1	0.875	208.875	.	196.571	295	139.625	138.571	147	84.125	84.1429	84	1034.12	1109	510	48	21	18	9	10	12	3	.	.	23	8	4	.	.	.	9	2	7	3	.	.	6
GC0	#REF!	+ve	E0	0	0	75	25	0.75	8	0	0	6	2	0.75	909.625	.	768.5	1333	587.75	582.667	603	155.75	152.5	165.5	1161.25	1337.5	632.5	49	19	17	13	17	15	3	1	.	13	8	7	.	1	.	3	5	6	2	.	.	4
GC1	#REF!	WT	E0	0	0	50	50	0.5	8	0	0	4	4	0.5	205.75	.	91.75	319.75	153.25	182.5	124	117.25	115.25	119.25	161.25	149.5	173	32	15	7	10	10	11	2	.	.	9	8	3	.	.	.	4	2	4	.	.	.	1
GC2	#REF!	+ve	E0	0	0	100	0	1	8	0	0	8	0	1	893.875	.	893.875	.	135.75	135.75	.	548.625	548.625	.	557.75	557.75	.	41	19	19	3	11	14	3	.	.	13	8	6	.	.	.	5	2	8	3	.	.	6
GC3	#REF!	+ve	E0	0	0	100	0	1	8	0	0	8	0	1	461.25	.	461.25	.	46.625	46.625	.	73.625	73.625	.	957.5	957.5	.	42	9	33	.	24	9	7	2	.	.	8	1	.	.	.	.	16	8	7	2	.	.
GE0	#REF!	+ve	E0	0	0	87.5	12.5	0.875	8	0	0	7	1	0.875	331.875	.	340.429	272	133.25	137.286	105	67.875	62.7143	104	465.125	491.571	280	55	20	27	8	8	10	4	.	1	32	8	2	.	.	.	10	.	7	1	.	1	18
GE1	#REF!	+ve	E0	0	0	100	0	1	8	0	0	8	0	1	155.125	.	155.125	.	99.625	99.625	.	30.625	30.625	.	702.625	702.625	.	27	16	10	1	9	9	.	.	.	9	8	1	.	.	.	7	1	8	.	.	.	1
GE2	#REF!	WT	E0	0	0	100	0	1	8	0	0	8	0	1	255.375	.	255.375	.	44.625	44.625	.	983.5	983.5	.	18.125	18.125	.	31	12	17	2	14	10	.	.	1	6	8	2	.	.	1	1	5	8	.	.	.	4
GE3	#REF!	+ve	E0	0	0	100	0	1	8	0	0	8	0	1	163.875	.	163.875	.	103.625	103.625	.	2319.88	2319.88	.	662.25	662.25	.	31	10	20	1	14	8	1	.	7	1	8	.	.	.	2	.	6	8	1	.	4	1
GK1	#REF!	WT	E0	25	12.5	37.5	25	0.375	8	2	1	3	2	0.6	760.5	900	189.667	1547	449.2	165.667	874.5	109.4	115.667	100	755	954	456.5	38	17	13	8	9	12	3	.	.	14	6	7	.	.	.	4	1	3	3	.	.	6
GK2	#REF!	WT	E0	0	0	75	25	0.75	8	0	0	6	2	0.75	214.125	.	241.167	133	115	130.167	69.5	346.875	404.5	174	36.75	16.5	97.5	73	29	25	19	11	11	5	1	9	36	8	3	1	.	4	13	1	6	1	.	5	12
GK3	#REF!	+ve	E0	0	0	100	0	1	8	0	0	8	0	1	666.875	.	666.875	.	103.375	103.375	.	321.875	321.875	.	784.875	784.875	.	29	10	13	6	9	8	.	.	.	12	8	.	.	.	.	2	.	8	.	.	.	5
GK4	#REF!	+ve	E0	0	0	100	0	1	8	0	0	8	0	1	90.125	.	90.125	.	167.25	167.25	.	94.375	94.375	.	722.125	722.125	.	178	86	92	.	9	45	22	3	.	99	8	37	.	.	.	41	1	8	22	3	.	58
GA0	#REF!	WT	E0	0	0	87.5	12.5	0.875	8	0	0	7	1	0.875	227.25	.	259	5	221.125	242.857	69	133	142.143	69	171.375	152.143	306	42	22	17	3	12	11	1	.	6	12	8	3	.	.	4	7	4	7	1	.	.	5
GA1	#REF!	WT	E0	0	0	87.5	12.5	0.875	8	0	0	7	1	0.875	257.125	.	264.571	205	159.375	141.429	285	71.125	58.5714	159	682.125	743	256	35	14	13	8	10	11	3	.	.	11	8	3	.	.	.	3	1	7	.	.	.	5
GA2	#REF!	+ve	E0	0	0	62.5	37.5	0.625	8	0	0	5	3	0.625	484.25	.	572.2	337.667	164.125	165.6	161.667	1566.75	2135.4	619	27.625	33	18.6667	47	17	24	6	11	10	4	.	3	19	8	2	.	.	2	5	3	5	3	.	1	12
GJ1	#REF!	+ve	E0	12.5	0	50	37.5	0.5	8	1	0	4	3	0.571429	1045.29	.	791	1384.33	653.714	781.5	483.333	123.143	95	160.667	681.714	926	356	14	7	4	3	7	7	.	.	.	.	7	.	.	.	.	.	.	4	.	.	.	.
GJ2	#REF!	+ve	E0	0	0	87.5	12.5	0.875	8	0	0	7	1	0.875	800.75	.	787.286	895	203.875	110.571	857	157.875	154.714	180	887.5	972.429	293	37	10	21	6	20	9	1	.	.	7	8	1	.	.	.	1	10	7	1	.	.	3
GJ3	#REF!	WT	E0	0	0	87.5	12.5	0.875	8	0	0	7	1	0.875	187.75	.	174.429	281	87.375	94.2857	39	98.75	98.5714	100	182.625	183.429	177	41	16	23	2	14	9	1	.	3	14	8	1	1	.	1	5	6	7	.	.	1	9
GG1	#REF!	+ve	E0	0	0	87.5	12.5	0.875	8	0	0	7	1	0.875	412.5	.	324.714	1027	163.5	135.429	360	95.5	97.5714	81	759.875	833.429	245	27	11	12	4	8	10	1	.	.	8	8	2	.	.	.	1	.	7	1	.	.	4
GG2	#REF!	+ve	E0	0	0	100	0	1	8	0	0	8	0	1	277.5	.	277.5	.	93.375	93.375	.	110.625	110.625	.	730.625	730.625	.	56	15	41	.	8	11	4	.	.	33	8	3	.	.	.	4	.	8	4	.	.	29
WT	11		Mean	10.2273	2.27273	71.5909	15.9091	0.715909	8	0.818182	0.181818	5.72727	1.27273	0.815909	530.448	1250.5	451.029	790.75	250.393	224.479	381	308.968	319.801	144.917	340.784	373.9	268.333	36.9091	16.2727	14.4545	6.8	10.8182	10.6364	2.33333	1	4.75	12.9	7.18182	3.63636	1	#DIV/0!	2.5	5.33333	2.90909	5.72727	2	#DIV/0!	3	6
Grb10	12		Mean	0.961538	0	88.4615	10.5769	0.884615	8	0.0769231	0	7.07692	0.846154	0.89011	514.839	#DIV/0!	484.058	874.833	204.295	204.821	428.333	435.886	476.733	218.361	700.065	747.052	304.194	48.6923	19.1538	25.6154	5.1	11.9231	12.6923	5	2	3.66667	22.3636	7.92308	6.2	#DIV/0!	1	2	7.9	5.5	7.07692	4.5	2.5	2	12.8182
			SE	5.54378	1.52459	6.96805	4.15977	0.0696805	0	0.443502	0.121967	0.557444	0.332782	0.0467431	142.526	149.454	144.976	295.327	59.5913	60.427	136.549	99.0519	102.381	31.1609	107.454	124.025	44.3366	4.52157	1.78423	1.91816	1.6005	0.658071	0.452724	0.398862	#DIV/0!	1.05529	3.08614	0.443502	0.621914	0	#DIV/0!	0.522233	1.13818	0.579256	0.557444	0.301511	#DIV/0!	0.852803	0.993485
			SE	1.0008	0	4.76477	4.12641	0.0476477	0	0.0800641	0	0.381181	0.330113	0.0438343	92.1501	#DIV/0!	80.4204	138.144	54.7627	62.9346	81.4057	202.017	228.05	57.7426	77.0861	87.6252	57.1852	11.7564	5.93348	6.41671	1.04039	1.53416	2.87804	1.80534	0.288675	0.881917	7.87959	0.0800641	3.18213	#DIV/0!	#DIV/0!	0	3.45192	1.50396	0.381181	1.85717	0.204124	0.5	4.97463
Choice - B2
GB0	27	WT	E0	37.5	0	62.5	0	0.625	8	3	0	5	0	1	1449.8	.	1449.8	.	338	338	.	734.8	734.8	.	97.2	97.2	.	29	8	21	.	12	5	2	.	.	10	5	.	.	.	.	3	7	5	2	.	.	7
GB1	34	WT	E0	50	37.5	0	12.5	0	8	4	3	0	1	0	1562.75	1568.33	.	1546	1899	.	1899	132	.	132	285	.	285	9	6	.	3	5	3	.	.	.	1	4	2	.	.	.	.	.	.	.	.	.	.
GF0	32	WT	E0	87.5	0	12.5	0	0.125	8	7	0	1	0	1	2625	.	2625	.	965	965	.	745	745	.	35	35	.	9	5	2	2	3	1	1	.	.	4	1	.	.	.	.	4	.	1	1	.	.	.
GF1	32	WT	E0	37.5	0	62.5	0	0.625	8	3	0	5	0	1	1046	.	1046	.	325.2	325.2	.	421.8	421.8	.	789.2	789.2	.	15	6	7	2	7	5	2	.	.	1	5	.	.	.	.	1	.	5	2	.	.	.
GC0	34	+ve	E0	12.5	0	50	37.5	0.5	8	1	0	4	3	0.571429	1946.29	.	2005.5	1867.33	397	379.5	420.333	152.143	147	159	932.571	1208.5	564.667	42	10	18	14	24	7	1	.	.	10	7	.	1	.	.	2	10	4	.	.	.	4
GC1	33	WT	E0	0	0	37.5	62.5	0.375	8	0	0	3	5	0.375	384.75	.	571.333	272.8	236	176.333	271.8	173	240	132.8	181.625	227	154.4	35	14	14	7	11	10	4	.	.	10	8	2	2	.	.	2	3	3	.	.	.	8
GC2	32	+ve	E0	0	0	87.5	12.5	0.875	8	0	0	7	1	0.875	1453	.	1578.57	574	80.875	52	283	6387	3215.14	28590	66.125	72	25	21	10	9	2	8	8	.	.	5	.	8	.	.	.	2	.	.	7	.	.	2	.
GC3	27	+ve	E0	0	0	100	0	1	8	0	0	8	0	1	685.875	.	685.875	.	48.75	48.75	.	77.25	77.25	.	872.875	872.875	.	39	10	29	.	18	8	11	.	.	2	8	.	.	.	.	2	10	8	11	.	.	.
GE0	27	+ve	E0	0	0	87.5	12.5	0.875	8	0	0	7	1	0.875	294.5	.	313.429	162	230.625	255.286	58	64.25	62.7143	75	281.5	248.571	512	42	14	22	6	16	10	3	.	.	13	8	2	.	.	.	4	6	7	3	.	.	6
GE1	27	+ve	E0	0	0	100	0	1	8	0	0	8	0	1	463.5	.	463.5	.	165.25	165.25	.	34.75	34.75	.	628.5	628.5	.	18	8	10	.	8	8	1	.	.	1	8	.	.	.	.	.	.	8	1	.	.	1
GE2	32	WT	E0	12.5	0	87.5	0	0.875	8	1	0	7	0	1	810.857	.	810.857	.	61	61	.	1415	1415	.	38.1429	38.1429	.	33	11	20	2	17	8	1	.	.	7	7	1	.	.	.	3	9	7	1	.	.	3
GE3	27	+ve	E0	0	0	87.5	12.5	0.875	8	0	0	7	1	0.875	438.25	.	472.714	197	142.5	147.714	106	833.125	951.571	4	587.5	622.143	345	20	9	10	1	11	9	.	.	.	.	8	1	.	.	.	.	3	7	.	.	.	.
GK1	35	WT	E0	50	25	0	25	0	8	4	2	0	2	0	1309.75	1392	.	1227.5	816.5	.	816.5	177.5	.	177.5	259	.	259	19	12	.	7	5	6	1	.	.	7	4	4	.	.	.	4	.	.	.	.	.	.
GK2	25	WT	E0	0	0	62.5	37.5	0.625	8	0	0	5	3	0.625	314.625	.	329	290.667	137.5	94.4	209.333	341.75	478.4	114	53.25	29.8	92.3333	61	26	26	9	9	12	6	1	1	32	8	4	.	.	.	14	.	5	4	1	1	15
GK3	33	+ve	E0	12.5	0	50	37.5	0.5	8	1	0	4	3	0.571429	1791.43	.	1591.5	2058	111.714	94.75	134.333	3288.43	371.5	7177.67	281.143	392.25	133	35	12	16	7	17	10	.	.	7	1	7	3	.	.	2	.	9	4	.	.	3	.
GK4	27	+ve	E0	0	0	100	0	1	8	0	0	8	0	1	190.375	.	190.375	.	95.75	95.75	.	92.25	92.25	.	717.125	717.125	.	86	26	60	.	13	24	32	9	.	8	8	16	.	.	.	2	5	8	32	9	.	6
GA0	32	WT	E0	0	0	75	25	0.75	8	0	0	6	2	0.75	149.25	.	137.167	185.5	229.25	233.333	217	116.125	119.167	107	205.125	206.333	201.5	34	15	13	6	8	10	2	.	3	11	8	2	.	.	1	4	.	6	2	.	2	3
GA1	27	WT	E0	0	0	75	25	0.75	8	0	0	6	2	0.75	369.375	.	421.833	212	88	100.667	50	67.25	60.8333	86.5	596.625	721.833	221	22	10	10	2	10	10	2	.	.	.	8	2	.	.	.	.	2	6	2	.	.	.
GA2	27	+ve	E0	12.5	0	62.5	25	0.625	8	1	0	5	2	0.714286	842.429	.	1000.4	447.5	381.143	476.2	143.5	1823.71	2281	680.5	27.2857	33.6	11.5	30	13	13	4	8	11	3	.	.	8	7	4	.	.	.	2	1	5	1	.	.	6
GJ1	35	+ve	E0	75	0	12.5	12.5	0.125	8	6	0	1	1	0.5	2425	.	1358	3492	1288.5	1349	1228	4525.5	228	8823	450	700	200	15	3	7	5	8	2	1	.	.	4	2	.	.	.	.	1	2	1	1	.	.	3
GJ2	32	+ve	E0	0	0	87.5	12.5	0.875	8	0	0	7	1	0.875	647.875	.	681.857	410	321.25	343.429	166	122.25	122.571	120	778.375	851.571	266	29	9	17	3	14	9	2	.	.	4	8	1	.	.	.	.	4	7	2	.	.	4
GJ3	32	WT	E0	0	0	87.5	12.5	0.875	8	0	0	7	1	0.875	285.75	.	292.429	239	112.375	118.429	70	263.125	287	96	93.5	85	153	35	16	16	3	11	8	2	.	2	12	8	.	1	.	1	6	3	7	1	.	1	4
GG1	32	+ve	E0	25	0	62.5	12.5	0.625	8	2	0	5	1	0.833333	1212.17	.	1112	1713	103.5	82.6	208	1760.5	2088	123	350.167	382.6	188	17	8	6	3	7	7	2	.	1	.	6	1	1	.	.	.	.	5	1	.	.	.
GG2	27	+ve	E0	62.5	0	37.5	0	0.375	8	5	0	3	0	1	354.667	.	354.667	.	87.3333	87.3333	.	98	98	.	638.667	638.667	.	13	7	6	.	4	7	.	.	.	2	3	4	.	.	.	.	1	3	.	.	.	2
WT	11		Mean	25	5.68182	51.1364	18.1818	0.511364	8	2	0.454545	4.09091	1.45455	0.670455	937.082	1480.17	853.713	567.638	473.439	268.04	504.805	417.032	500.222	120.829	239.424	247.723	195.176	27.3636	11.7273	14.3333	4.3	8.90909	7.09091	2.3	1	2	9.5	6	2.42857	1.5	#DIV/0!	1	4.55556	4.8	5	1.875	1	1.33333	6.66667
Grb10	12		Mean	15.3846	0	71.1538	13.4615	0.711538	8	1.23077	0	5.69231	1.07692	0.822344	980.412	#DIV/0!	908.338	1213.43	265.707	275.197	305.241	1481.47	751.519	5083.57	508.603	566.8	249.463	31.3077	10.6923	17.1538	5	12	9.23077	6.22222	9	4.33333	5.3	6.76923	4	1	#DIV/0!	2	2.16667	5.1	5.69231	6.5	9	2.5	4
			SE	8.91883	3.90354	10.0361	5.92655	0.100361	0	0.713506	0.312283	0.802887	0.474124	0.115887	228.231	37.5944	236.01	171.304	168.139	84.4059	200.804	122.286	126.573	9.13911	73.5656	89.5647	20.1761	4.52523	1.82453	2.24114	0.804658	1.1867	1.02207	0.472475	#DIV/0!	0.301511	2.66382	0.713506	0.341882	0.213201	#DIV/0!	0	1.14922	0.914529	0.583874	0.298807	#DIV/0!	0.174078	1.38389
			SE	7.23997	0	7.98553	3.74465	0.0798553	0	0.579198	0	0.638842	0.299572	0.0512996	207.803	#DIV/0!	167.419	328.538	94.9494	101.241	104.596	593.616	308.66	2728.5	84.39	96.2392	56.3173	5.60058	1.55181	4.19961	1.11803	1.62447	1.42962	2.9325	#DIV/0!	0.881917	1.20991	0.579198	1.44749	0	#DIV/0!	0	0.283823	1.02243	0.638842	3.13202	#DIV/0!	0.204124	0.556349
Choice - B3
GB0	27	WT	E0	37.5	0	62.5	0	0.625	8	3	0	5	0	1	1379	.	1379	.	217.6	217.6	.	554.4	554.4	.	94.2	94.2	.	19	8	11	.	10	8	1	.	.	.	5	3	.	.	.	.	5	5	1	.	.	.
GB1	34	WT	E0	50	25	12.5	12.5	0.125	8	4	2	1	1	0.5	818.5	496	1327	955	1000.5	75	1926	77.5	63	92	499.5	744	255	12	7	4	1	4	4	.	.	.	4	4	2	.	.	.	1	.	1	.	.	.	3
GF0	32	WT	E0	75	0	0	25	0	8	6	0	0	2	0	2953.5	.	.	2953.5	217	.	217	8327	.	8327	95	.	95	4	2	.	2	2	2	.	.	.	.	2	.	.	.	.	.	.	.	.	.	.	.
GF1	32	WT	E0	75	12.5	12.5	0	0.125	8	6	1	1	0	1	1553	1626	1480	.	419	419	.	17661	17661	.	2	2	.	9	3	2	4	4	2	.	.	.	3	2	1	.	.	.	.	1	1	.	.	.	.
GC0	34	+ve	E0	0	50	37.5	12.5	0.375	8	0	4	3	1	0.75	1835.25	2020	891	3929	793	795.667	785	141.25	139	148	720.75	848	339	59	18	29	12	20	9	4	1	.	25	8	5	.	.	.	5	6	3	4	1	.	15
GC1	33	WT	E0	12.5	0	62.5	25	0.625	8	1	0	5	2	0.714286	396.429	.	350	512.5	188.429	164	249.5	122	105	164.5	129.143	142.2	96.5	36	15	17	4	10	13	3	.	.	10	7	6	.	.	.	2	3	5	2	.	.	7
GC2	32	+ve	E0	25	0	62.5	12.5	0.625	8	2	0	5	1	0.833333	1496.17	.	1641.2	771	69.6667	70.4	66	2321.33	2506.8	1394	39.1667	44	15	16	7	7	2	8	6	1	.	.	1	6	.	.	.	.	1	2	5	.	.	.	.
GC3	27	+ve	E0	0	0	100	0	1	8	0	0	8	0	1	1089.5	.	1089.5	.	108.25	108.25	.	74.25	74.25	.	755.5	755.5	.	39	8	31	.	15	8	15	1	.	.	8	.	.	.	.	.	7	8	15	1	.	.
GE0	27	+ve	E0	0	0	87.5	12.5	0.875	8	0	0	7	1	0.875	624.5	.	554	1118	192.625	140.857	555	160.25	160.286	160	158.25	151	209	28	8	17	3	15	8	2	.	1	2	8	.	.	.	.	.	6	7	1	.	1	2
GE1	27	+ve	E0	12.5	0	75	12.5	0.75	8	1	0	6	1	0.857143	949.857	.	1027.33	485	487.429	453	694	101	80.5	224	564.571	614.833	263	17	8	8	1	8	8	1	.	.	.	7	1	.	.	.	.	1	6	1	.	.	.
GE2	32	WT	E0	75	0	25	0	0.25	8	6	0	2	0	1	2929.5	.	2929.5	.	262.5	262.5	.	1450.5	1450.5	.	77.5	77.5	.	8	2	4	2	6	2	.	.	.	.	2	.	.	.	.	.	2	2	.	.	.	.
GE3	27	+ve	E0	12.5	12.5	62.5	12.5	0.625	8	1	1	5	1	0.833333	840.286	1476	737.4	719	400.5	241.2	1197	333.667	373.6	134	764.5	880	187	17	7	7	3	7	6	3	.	.	1	7	.	.	.	.	.	.	5	2	.	.	.
GK1	35	WT	E0	0	0	0	0	0	8	0	0	0	0	0	.	.	.	.	.	.	.	.	.	.	.	.	.	.	.	.	.	.	.	.	.	.	.	.	.	.	.	.	.	.	.	.	.	.	.
GK2	25	WT	E0	0	0	62.5	37.5	0.625	8	0	0	5	3	0.625	231.125	.	234.6	225.333	139.125	143.2	132.333	302.25	378.6	175	35.375	25.8	51.3333	54	15	31	8	11	10	3	2	3	25	8	2	.	.	1	4	2	5	3	2	1	18
GK3	33	+ve	E0	12.5	12.5	25	50	0.25	8	1	1	2	4	0.333333	1185.43	1548	437.5	1468.75	122.667	85.5	141.25	4148	3240.5	4601.75	35.5	31.5	37.5	18	9	3	6	10	7	.	.	1	.	7	1	.	.	1	.	1	2	.	.	.	.
GK4	27	+ve	E0	0	12.5	87.5	0	0.875	8	0	1	7	0	1	583.75	1169	500.143	.	224.286	224.286	.	118	118	.	628.286	628.286	.	70	23	47	.	13	20	31	6	.	.	8	13	1	1	.	.	5	7	30	5	.	.
GA0	32	WT	E0	0	0	100	0	1	8	0	0	8	0	1	351	.	351	.	145.5	145.5	.	186	186	.	112.625	112.625	.	37	18	16	3	11	10	3	.	2	11	8	2	.	.	1	7	3	8	3	.	.	2
GA1	27	WT	E0	0	0	87.5	12.5	0.875	8	0	0	7	1	0.875	715.875	.	727	638	102.625	107.143	71	179.5	68.1429	959	682.75	745.429	244	24	8	9	7	10	8	3	1	1	1	8	.	.	.	.	.	2	7	.	.	.	.
GA2	27	+ve	E0	37.5	12.5	50	0	0.5	8	3	1	4	0	1	2155.6	3635	1785.75	.	489.75	489.75	.	1694.25	1694.25	.	38.5	38.5	.	11	5	6	.	5	4	2	.	.	.	5	.	.	.	.	.	.	4	2	.	.	.
GJ1	35	+ve	E0	100	0	0	0	0	8	8	0	0	0	0	.	.	.	.	.	.	.	.	.	.	.	.	.	3	.	.	3	1	.	.	.	.	2	.	.	.	.	.	.	.	.	.	.	.	.
GJ2	32	+ve	E0	12.5	12.5	62.5	12.5	0.625	8	1	1	5	1	0.833333	723	1376	632.6	522	198	143.6	470	127.667	124.4	144	697.833	785.2	261	44	20	20	4	13	11	4	.	.	16	7	5	.	.	.	8	5	5	4	.	.	6
GJ3	32	WT	E0	0	0	87.5	12.5	0.875	8	0	0	7	1	0.875	482.625	.	491	424	138.375	106.714	360	94.875	96.4286	84	103.5	110.286	56	23	8	14	1	13	8	1	.	.	1	8	.	.	.	.	.	5	7	1	.	.	1
GG1	32	+ve	E0	50	12.5	37.5	0	0.375	8	4	1	3	0	1	2500.25	3229	2257.33	.	392.667	392.667	.	13765.3	13765.3	.	301	301	.	24	10	6	8	8	4	1	.	9	2	4	1	.	.	4	1	2	3	1	.	.	.
GG2	27	+ve	E0	37.5	0	62.5	0	0.625	8	3	0	5	0	1	2145	.	2145	.	112	112	.	4199.2	4199.2	.	131.4	131.4	.	20	10	10	.	7	8	1	.	1	3	5	3	.	.	1	1	2	5	1	.	.	2
WT	11		Mean	29.5455	3.40909	46.5909	11.3636	0.465909	8	2.36364	0.272727	3.72727	0.909091	0.689935	1181.06	1061	1029.9	951.389	283.065	182.295	492.639	2895.5	2284.79	1633.58	183.159	228.227	132.972	22.6	8.6	12	3.55556	8.1	6.7	2.33333	1.5	2	7.85714	5.4	2.66667	#DIV/0!	#DIV/0!	1	3.5	2.875	4.55556	2	2	1	6.2
Grb10	12		Mean	23.0769	9.61538	57.6923	9.61538	0.576923	8	1.84615	0.769231	4.61538	0.769231	0.793498	1344.05	2064.71	1141.56	1287.54	299.237	271.431	558.321	2265.35	2206.34	972.25	402.938	434.102	187.357	28.1538	11.0833	15.9167	4.66667	10	8.25	5.90909	2.66667	3	6.5	6.66667	4.14286	1	1	2	3.2	3.7	5	6.1	2.33333	1	6.25
			SE	10.1512	2.43723	11.3181	3.93648	0.113181	0	0.812099	0.194978	0.905447	0.314918	0.114652	308.447	240.917	260.224	304.649	80.6763	31.9442	213.831	1740.81	1743.65	993.801	67.0752	89.2539	27.824	4.76138	1.71859	2.70521	0.755452	1.13217	1.1896	0.3114	0.213201	0.301511	2.5845	0.818967	0.528004	#DIV/0!	#DIV/0!	0	0.797724	0.439525	0.799305	0.301511	#DIV/0!	#DIV/0!	2.10411
			SE	8.18171	3.94016	8.00641	3.94016	0.0800641	0	0.654537	0.315213	0.640513	0.315213	0.0862793	192.314	281.7	188.087	350.774	62.5919	63.5865	111.918	1138.86	1130.11	480.723	89.7831	100.277	34.7158	5.64068	1.68531	3.89533	1	1.45297	1.21309	2.66913	0.833333	1.1547	2.59578	0.395684	1.24084	#DIV/0!	#DIV/0!	0.5	0.921954	0.667361	0.522233	2.71638	0.666667	#DIV/0!	1.76973
TOTALS				% Responses				All		Responses		Total	Total	% (AD/AD+NA)	Latency to Initiate (CP)				Latency to respond (NP)			Latency to collect			Duration of first eat (PP)			Number of NPs				All NPs						Centre NPs only						Adjusted NPs only
Subject	Session	Gtype	Task	DNS	Omits	AD	NA	Bias	Trials	DNS	Omits	AD	NA	Bias	All	Omits	AD	NA	All	AD	NA	All	AD	NA	All	AD	NA	All	Centre	AD	NA	0	1	2	3	4	5	0	1	2	3	4	5	0	1	2	3	4	5
GB0	-1	WT	E0	0	0	95.8333	4.16667	0.958333	24	0	0	23	1	0.958333	555.333	#DIV/0!	457.47	2941	219.083	173.583	1355	1159.79	1179.9	405	117.292	115.804	105	52.6667	21	24	7.66667	16.6667	10.6667	2.66667	#DIV/0!	16	17.3333	8	2.66667	#DIV/0!	#DIV/0!	4	9	8.33333	7.66667	3.5	#DIV/0!	6	5.5
GB1	26	WT	E0	29.1667	8.33333	45.8333	16.6667	0.458333	24	7	2	11	4	0.733333	1467.99	1027.5	1607.28	1323.83	630.5	698.278	437.667	90.5952	80.1667	112.833	767.988	933.111	369.167	20	11	6	3	8	9.66667	1.5	#DIV/0!	#DIV/0!	2	5.66667	4.66667	2	#DIV/0!	#DIV/0!	#DIV/0!	2	3.66667	1	#DIV/0!	#DIV/0!	2
GF0	33	WT	E0	33.3333	0	41.6667	25	0.416667	24	8	0	10	6	0.625	878.567	#DIV/0!	940.583	766.833	358.748	486.5	170	473.021	621	234	107.788	83.3333	175	20.3333	8.33333	9.33333	4	9.33333	8	1.66667	#DIV/0!	#DIV/0!	2	5.33333	4	1	#DIV/0!	#DIV/0!	#DIV/0!	3.66667	3.33333	1.33333	#DIV/0!	#DIV/0!	3
GF1	31	WT	E0	0	0	91.6667	8.33333	0.916667	24	0	0	22	2	0.916667	342.083	#DIV/0!	343.923	228	194.958	195.577	143	81.5833	79.1071	109.5	1160.46	1217.32	484.5	35.6667	16.6667	14	5	9.66667	9.66667	2.5	#DIV/0!	#DIV/0!	14.6667	8	2.5	#DIV/0!	#DIV/0!	#DIV/0!	7	1.66667	7.33333	2.5	#DIV/0!	#DIV/0!	3.33333
GC0	31	+ve	E0	0	0	66.6667	33.3333	0.666667	24	0	0	16	8	0.666667	894.167	#DIV/0!	1212.39	722.8	427.458	282.381	837.467	127.125	109.643	152.633	1013.38	1225.06	669.1	54	19.6667	18	16.3333	21.6667	11.3333	3.66667	1	#DIV/0!	17	8	3.33333	2.5	1	#DIV/0!	6.33333	6.66667	5.33333	2	#DIV/0!	#DIV/0!	5.33333
GC1	33	WT	E0	0	4.16667	50	45.8333	0.5	24	0	1	12	11	0.521739	426.583	1788	336.383	382.861	235.018	178.189	294.444	130.369	124.306	129.889	254.065	282.189	239.139	37.3333	19.3333	11	7	10	16	3.33333	#DIV/0!	#DIV/0!	8	8	8.33333	4	#DIV/0!	#DIV/0!	2.5	3	4	1.5	#DIV/0!	#DIV/0!	4
GC2	32	+ve	E0	0	0	100	0	1	24	0	0	24	0	1	523.958	#DIV/0!	523.958	#DIV/0!	83.9167	83.9167	#DIV/0!	413.417	413.417	#DIV/0!	717.583	717.583	#DIV/0!	33	16	14.6667	2.33333	9	12	1.66667	#DIV/0!	#DIV/0!	10.3333	8	4	#DIV/0!	#DIV/0!	#DIV/0!	6	2	8	1.66667	#DIV/0!	#DIV/0!	4.33333
GC3	31	+ve	E0	4.16667	0	95.8333	0	0.958333	24	1	0	23	0	1	254.464	#DIV/0!	254.464	#DIV/0!	42.5774	42.5774	#DIV/0!	76.6429	76.6429	#DIV/0!	1064.48	1064.48	#DIV/0!	37.6667	8.66667	29	#DIV/0!	14	8.33333	12.3333	1.33333	#DIV/0!	5	7.66667	1	#DIV/0!	#DIV/0!	#DIV/0!	1	9.5	7.66667	12.3333	1.33333	#DIV/0!	4
GE0	26	+ve	E0	0	0	91.6667	8.33333	0.916667	24	0	0	22	2	0.916667	399.458	#DIV/0!	413.065	209.5	141.583	136.637	214	77.0417	76.8095	88.5	422	432.744	251.5	45.6667	16	24	5.66667	11.3333	10	3.66667	1	2	19	8	2	#DIV/0!	#DIV/0!	2	5.33333	5	7.33333	2.33333	#DIV/0!	1	10.6667
GE1	26	+ve	E0	0	0	100	0	1	24	0	0	24	0	1	115.417	#DIV/0!	115.417	#DIV/0!	92.875	92.875	#DIV/0!	149.625	149.625	#DIV/0!	608.292	608.292	#DIV/0!	27	12.3333	12.6667	2	9	8.66667	1	#DIV/0!	#DIV/0!	9	8	1	#DIV/0!	#DIV/0!	#DIV/0!	3.66667	1.5	8	1	#DIV/0!	#DIV/0!	3.33333
GE2	26	WT	E0	0	0	87.5	12.5	0.875	24	0	0	21	3	0.875	632.167	#DIV/0!	634.284	966.75	126.042	106.097	391	1082.79	1216.37	292.5	27.7917	30.4464	22	31.6667	11.6667	17	3	17.3333	10	1.5	#DIV/0!	1	4.5	8	2	1.5	#DIV/0!	1	1	7.66667	7	#DIV/0!	#DIV/0!	#DIV/0!	3.5
GE3	31	+ve	E0	0	0	100	0	1	24	0	0	24	0	1	174.458	#DIV/0!	174.458	#DIV/0!	82.125	82.125	#DIV/0!	1504.42	1504.42	#DIV/0!	446.875	446.875	#DIV/0!	31.3333	9.66667	21.3333	1	14.6667	8.33333	1	#DIV/0!	4.33333	5.5	8	1	#DIV/0!	#DIV/0!	1.5	1	6.66667	8	1	#DIV/0!	3	5
GK1	26	WT	E0	8.33333	4.16667	58.3333	29.1667	0.583333	24	2	1	14	7	0.666667	504.708	900	341.011	699.056	368.025	226.711	594.444	95.0917	88.8	107.222	788.5	951.078	483.5	42.3333	17.6667	12.6667	12	9.66667	12.6667	4.66667	#DIV/0!	#DIV/0!	15.3333	7.33333	5.66667	#DIV/0!	#DIV/0!	#DIV/0!	4.66667	1	4.66667	3.33333	#DIV/0!	#DIV/0!	4.33333
GK3	34	+ve	E0	0	0	75	25	0.75	24	0	0	18	6	0.75	258.25	#DIV/0!	277.475	166.667	116.458	110.541	123.389	337.417	410.186	173.667	31	24.5762	53.0556	67.6667	25.6667	27.3333	14.6667	9.66667	12.6667	6	1.33333	9.66667	28.3333	8	4.66667	1.5	#DIV/0!	3.33333	8.66667	1	6	3.66667	1.5	5	12.6667
GK4	24	+ve	E0	0	0	95.8333	4.16667	0.958333	24	0	0	23	1	0.958333	308.792	#DIV/0!	308.119	103	80.125	80.7143	43	197.375	193.875	146	847.333	874.054	308	40.3333	15.6667	19.6667	5	10.6667	8.66667	#DIV/0!	#DIV/0!	#DIV/0!	21	8	1	#DIV/0!	#DIV/0!	#DIV/0!	7	1.5	7.66667	#DIV/0!	#DIV/0!	#DIV/0!	11
GA0	32	WT	E0	0	0	100	0	1	24	0	0	24	0	1	94.625	#DIV/0!	94.625	#DIV/0!	188.083	188.083	#DIV/0!	119.458	119.458	#DIV/0!	826.208	826.208	#DIV/0!	174.667	77.3333	97.3333	#DIV/0!	13.6667	38.3333	22.3333	6	#DIV/0!	94.3333	8	30.3333	3	#DIV/0!	#DIV/0!	37	5.66667	8	20.3333	6	#DIV/0!	57.3333
GA1	26	WT	E0	0	0	95.8333	4.16667	0.958333	24	0	0	23	1	0.958333	351.333	#DIV/0!	361.917	5	201.625	208.869	69	99.25	102.298	69	245.708	239.298	306	45	18.3333	24	2.66667	13.6667	9.33333	1	#DIV/0!	6.33333	15.3333	8	2	#DIV/0!	#DIV/0!	3.66667	5.33333	5.66667	7.66667	1	#DIV/0!	2.5	8.66667
GA2	31	+ve	E0	0	0	87.5	12.5	0.875	24	0	0	21	3	0.875	211.333	#DIV/0!	220.163	161.75	98.75	90.5734	181.25	56.875	49.9544	116.25	691.875	755.278	268.5	33.6667	14.6667	14	5	10.3333	11	1.66667	#DIV/0!	#DIV/0!	10.6667	8	3	1	#DIV/0!	#DIV/0!	3.33333	2	7	1	#DIV/0!	#DIV/0!	5.33333
GJ1	26	+ve	E0	0	0	79.1667	20.8333	0.791667	24	0	0	19	5	0.791667	392.333	#DIV/0!	402.543	477.222	136.75	118.2	269.222	1337.54	1493.56	1256.33	31.5833	32.3333	35.8889	40	16.3333	20	3.66667	10	10.3333	2.5	#DIV/0!	3.5	15.6667	8	3.5	1	#DIV/0!	2	5	2	6.33333	3	#DIV/0!	2	9.33333
GJ2	26	+ve	E0	8.33333	4.16667	54.1667	33.3333	0.541667	24	2	1	13	8	0.619048	840.839	419	807.733	907.944	577.286	733.65	357.722	86.8095	83.3	88.1667	728.905	937.367	397.222	17.3333	8.66667	5.33333	3.33333	8.66667	8.33333	#DIV/0!	#DIV/0!	#DIV/0!	1	7.33333	2	#DIV/0!	#DIV/0!	#DIV/0!	#DIV/0!	1.5	4.33333	#DIV/0!	#DIV/0!	#DIV/0!	#DIV/0!
GJ3	34	WT	E0	4.16667	0	87.5	8.33333	0.875	24	1	0	21	2	0.913043	1032.9	#DIV/0!	1032.07	738	150.548	122.954	462.5	175.827	168.821	269.5	886.256	942.907	258	48.6667	11.3333	34	3.33333	27	9	2	#DIV/0!	#DIV/0!	10.6667	7.66667	1.33333	#DIV/0!	#DIV/0!	#DIV/0!	2.33333	17.6667	7	2	#DIV/0!	#DIV/0!	7.33333
GG1	31	+ve	E0	0	0	87.5	12.5	0.875	24	0	0	21	3	0.875	230.292	#DIV/0!	218	316.333	88.1667	91.8095	62.6667	102.875	102.524	105.333	183.375	193.429	113	38.3333	14	22	2.33333	13.6667	8.66667	1.66667	#DIV/0!	5.5	10.6667	8	1	1	#DIV/0!	2	4.5	5.66667	7	1	#DIV/0!	3	6.66667
GG2	31	+ve	E0	8.33333	0	75	16.6667	0.75	24	2	0	18	4	0.818182	459.452	#DIV/0!	486.369	597.5	213.214	141.012	464.833	136.357	106.417	189.333	673.673	775.262	238.5	32.3333	11.3333	14.3333	6.66667	9.66667	9	1.66667	#DIV/0!	#DIV/0!	12	7.33333	2.5	#DIV/0!	#DIV/0!	#DIV/0!	2.33333	1.5	6	1.33333	#DIV/0!	#DIV/0!	9
WT	10	Mean	#DIV/0!	7.5	1.66667	75.4167	15.4167	0.754167	24	1.8	0.4	18.1	3.7	0.816812	628.63	#DIV/0!	614.954	#DIV/0!	267.263	258.484	#DIV/0!	350.778	378.023	#DIV/0!	518.206	562.17	#DIV/0!	50.8333	21.2667	24.9333	#DIV/0!	13.5	13.3333	4.31667	#DIV/0!	#DIV/0!	18.4167	7.4	6.35	#DIV/0!	#DIV/0!	#DIV/0!	#DIV/0!	5.63333	6.03333	#DIV/0!	#DIV/0!	#DIV/0!	9.9
Grb10	13	Mean	#DIV/0!	1.60256	0.320513	85.2564	12.8205	0.852564	24	0.384615	0.0769231	20.4615	3.07692	0.866966	389.478	#DIV/0!	416.473	#DIV/0!	167.791	160.539	#DIV/0!	354.117	366.952	#DIV/0!	573.873	622.102	#DIV/0!	38.3333	14.5128	18.641	#DIV/0!	11.7179	9.79487	#DIV/0!	#DIV/0!	#DIV/0!	12.7051	7.87179	2.30769	#DIV/0!	#DIV/0!	#DIV/0!	#DIV/0!	3.57692	6.82051	#DIV/0!	#DIV/0!	#DIV/0!	#DIV/0!
		SE	#DIV/0!	4.06354	0.921285	7.41334	4.48118	0.0741334	0	0.975249	0.221108	1.7792	1.07548	0.0526629	126.322	#DIV/0!	143.402	#DIV/0!	47.5156	58.9765	#DIV/0!	133.616	145.968	#DIV/0!	128.753	142.464	#DIV/0!	14.1851	6.37139	8.46865	#DIV/0!	1.81438	2.86916	2.03024	#DIV/0!	#DIV/0!	8.62738	0.325083	2.74744	#DIV/0!	#DIV/0!	#DIV/0!	#DIV/0!	1.55432	0.593067	#DIV/0!	#DIV/0!	#DIV/0!	5.30962
		SE	#DIV/0!	0.88746	0.320513	3.9925	3.41713	0.039925	0	0.21299	0.0769231	0.958199	0.820112	0.0362553	67.0775	#DIV/0!	83.4994	#DIV/0!	43.5535	50.3227	#DIV/0!	134.834	143.172	#DIV/0!	93.3309	105.241	#DIV/0!	3.46369	1.30832	1.79405	#DIV/0!	0.997751	0.424564	#DIV/0!	#DIV/0!	#DIV/0!	2.05118	0.0709968	0.35947	#DIV/0!	#DIV/0!	#DIV/0!	#DIV/0!	0.767627	0.3194	#DIV/0!	#DIV/0!	#DIV/0!	#DIV/0!
Choice - B2
GB0	60	WT	E0	12.5	0	87.5	0	0.875	24	3	0	21	0	1	893.6	#DIV/0!	893.6	#DIV/0!	193.333	193.333	#DIV/0!	1219.77	1219.77	#DIV/0!	102.442	102.442	#DIV/0!	35.3333	11.6667	18.6667	7.5	13	9	2	#DIV/0!	3	10.3333	7	3	#DIV/0!	#DIV/0!	#DIV/0!	2.66667	5.66667	7	2	#DIV/0!	#DIV/0!	6
GB1	65	WT	E0	54.1667	20.8333	16.6667	8.33333	0.166667	24	13	5	4	2	0.666667	1957.78	1665.44	1993.25	2363	981.417	574.25	1185	96.5	80.5	104.5	499.667	918	290.5	7.66667	4.66667	4	2.5	4.33333	3	#DIV/0!	#DIV/0!	#DIV/0!	1	3.66667	1.5	#DIV/0!	#DIV/0!	#DIV/0!	#DIV/0!	#DIV/0!	4	#DIV/0!	#DIV/0!	#DIV/0!	#DIV/0!
GF0	65	WT	E0	87.5	0	8.33333	4.16667	0.0833333	24	21	0	2	1	0.666667	2750	#DIV/0!	2646.5	2957	917	585.5	1580	706	930	258	128.667	32	322	6.33333	3.33333	1.66667	2	2	2	1	#DIV/0!	#DIV/0!	3	1	1.5	#DIV/0!	#DIV/0!	#DIV/0!	4	1	1	1	#DIV/0!	#DIV/0!	1
GF1	65	WT	E0	33.3333	8.33333	45.8333	12.5	0.458333	24	8	2	11	3	0.785714	1344.93	1382.5	1602.25	692.333	336.162	359.983	440	942.243	942.017	100.333	671.876	738.483	310	14.3333	6.66667	5	2.66667	7.66667	5	2	#DIV/0!	#DIV/0!	1	5.33333	1	#DIV/0!	#DIV/0!	#DIV/0!	1	2	3.66667	2	#DIV/0!	#DIV/0!	#DIV/0!
GC0	65	+ve	E0	12.5	4.16667	45.8333	37.5	0.458333	24	3	1	11	9	0.55	1525.32	2197	1262.28	1760.19	533.275	425.056	628.028	143.581	126.333	153.417	790.74	1079.33	456.472	43.6667	13.6667	15	15	18	8.66667	2	#DIV/0!	#DIV/0!	15	7	6	1	#DIV/0!	#DIV/0!	4.33333	6.33333	3.66667	2	#DIV/0!	#DIV/0!	4.33333
GC1	65	WT	E0	0	0	62.5	37.5	0.625	24	0	0	15	9	0.625	585.667	#DIV/0!	674.333	468.933	267.292	220.889	358.767	135.958	155.556	130.767	222.417	238.833	209.467	37	13	18.6667	5.33333	10.6667	11	5.33333	#DIV/0!	#DIV/0!	10	8	3	2	#DIV/0!	#DIV/0!	2	2.66667	5	3.5	#DIV/0!	#DIV/0!	8.66667
GC2	65	+ve	E0	25	0	62.5	12.5	0.625	24	6	0	15	3	0.833333	1152.25	#DIV/0!	1214.11	410.25	112.458	96.75	207.75	2375.22	1270.46	14552.5	542.653	623.833	210	18	8.33333	7.66667	3	6	6.33333	1	#DIV/0!	5	11	6	1	1	#DIV/0!	2	3	#DIV/0!	5	#DIV/0!	#DIV/0!	2	6
GC3	60	+ve	E0	0	0	100	0	1	24	0	0	24	0	1	439.75	#DIV/0!	439.75	#DIV/0!	49.7917	49.7917	#DIV/0!	74.2917	74.2917	#DIV/0!	971.833	971.833	#DIV/0!	40	11	29	#DIV/0!	13.6667	9.33333	14.3333	1	#DIV/0!	2.33333	8	2	#DIV/0!	#DIV/0!	#DIV/0!	1.66667	8.5	8	14.3333	1	#DIV/0!	2
GE0	60	+ve	E0	0	0	91.6667	8.33333	0.916667	24	0	0	22	2	0.916667	344.875	#DIV/0!	361.185	161.5	159.208	159.53	200	107.75	106.292	107	289.042	275.423	370	37.3333	13	19	5.33333	11	9.33333	3.33333	#DIV/0!	1	13.3333	8	2	#DIV/0!	#DIV/0!	1	3.33333	3.5	7.33333	3.33333	#DIV/0!	#DIV/0!	6
GE1	60	+ve	E0	0	0	100	0	1	24	0	0	24	0	1	315.667	#DIV/0!	315.667	#DIV/0!	130.917	130.917	#DIV/0!	86.9167	86.9167	#DIV/0!	607.833	607.833	#DIV/0!	23.3333	11.6667	10.6667	3	8.66667	10.3333	1	#DIV/0!	#DIV/0!	3.33333	8	3.5	#DIV/0!	#DIV/0!	#DIV/0!	4	1	8	1	#DIV/0!	#DIV/0!	1.5
GE2	65	WT	E0	12.5	4.16667	75	8.33333	0.75	24	3	1	18	2	0.9	1541.62	3871	1488.02	1533.5	100.071	83.0889	269.5	1561.98	1542.23	1700.5	34.8413	37.0587	16.5	28.6667	10.6667	14.3333	3.66667	16.6667	8.33333	1	#DIV/0!	#DIV/0!	4	7	2.5	1	#DIV/0!	#DIV/0!	2	7	6	1	#DIV/0!	#DIV/0!	3
GE3	60	+ve	E0	0	0	87.5	12.5	0.875	24	0	0	21	3	0.875	331.208	#DIV/0!	261.905	816.333	149.583	139.81	218	933	1058.76	52.6667	502.667	527.667	327.667	20.6667	10.6667	8.66667	1.33333	9.33333	9.66667	1	2	1	#DIV/0!	8	1.66667	1	1	1	#DIV/0!	2	7	#DIV/0!	1	#DIV/0!	#DIV/0!
GK1	65	WT	E0	66.6667	12.5	8.33333	12.5	0.0833333	24	16	3	2	3	0.4	1067.5	1138	746.5	1075.75	1217.08	1567.5	1267.25	190.25	264	129.25	448.5	811	275.5	24	7.33333	8	11.3333	4.33333	6	3.5	1	2	12.3333	4	3.5	#DIV/0!	#DIV/0!	#DIV/0!	2.33333	1	2	5	1	2	2.5
GK3	65	+ve	E0	0	0	62.5	37.5	0.625	24	0	0	15	9	0.625	418.958	#DIV/0!	303.175	380.956	166.458	95.0222	300.111	266.875	323.641	154.133	38.0833	23.0921	61.5111	54	21.3333	21	11.6667	10	13.3333	4.33333	1	4	21.6667	8	5.33333	1	#DIV/0!	1	7.33333	1.5	5	2.66667	1	2.66667	9
GK4	60	+ve	E0	4.16667	0	83.3333	12.5	0.833333	24	1	0	20	3	0.869565	1149.48	#DIV/0!	1082.83	2058	85.4881	79.8333	134.333	1275.81	303.5	7177.67	519.464	556.5	133	27.6667	10.3333	13.6667	3.66667	14.6667	9	1	#DIV/0!	7	2	7.66667	2	#DIV/0!	#DIV/0!	2	2	5.33333	6.66667	1	#DIV/0!	3	1
GA0	65	WT	E0	0	0	100	0	1	24	0	0	24	0	1	156.75	#DIV/0!	156.75	#DIV/0!	134.75	134.75	#DIV/0!	105.292	105.292	#DIV/0!	864.333	864.333	#DIV/0!	118	48.6667	69.3333	#DIV/0!	15.6667	27	22.3333	6.33333	3	45.6667	8	19	4	1	#DIV/0!	18.6667	7.66667	8	19.6667	6	3	27
GA1	60	WT	E0	8.33333	0	83.3333	8.33333	0.833333	24	2	0	20	2	0.909091	446.347	#DIV/0!	442.319	185.5	241.194	242.556	217	90.8889	91.9028	107	217	217.403	201.5	34.3333	14.3333	16.6667	3.33333	11.6667	8.33333	1.33333	#DIV/0!	3.66667	14	7.33333	1.5	#DIV/0!	#DIV/0!	1.66667	6.5	6.5	6.66667	1.33333	#DIV/0!	2.5	4
GA2	60	+ve	E0	0	0	70.8333	29.1667	0.708333	24	0	0	17	7	0.708333	385.833	#DIV/0!	330.409	789.25	98.6667	107.841	96.3333	65.875	56.2063	87.75	637.625	783.563	275	23.3333	10.3333	10	3	10.6667	9.66667	1.33333	#DIV/0!	#DIV/0!	5	8	1.66667	#DIV/0!	#DIV/0!	#DIV/0!	2	2.66667	5.66667	1.33333	#DIV/0!	#DIV/0!	1
GJ1	65	+ve	E0	8.33333	0	75	16.6667	.	24	2	0	18	4	0.818182	1108.42	#DIV/0!	1143.58	1375.75	374.071	374.7	464	1551.49	1786.81	760	24.7798	27.7417	15.25	23.6667	10.6667	10.6667	3.5	7.66667	9.33333	1.66667	#DIV/0!	#DIV/0!	7.5	7.33333	3	#DIV/0!	#DIV/0!	#DIV/0!	2	1	6	1	#DIV/0!	#DIV/0!	5.5
GJ2	65	+ve	E0	66.6667	4.16667	16.6667	12.5	0.166667	24	16	1	4	3	0.571429	1994.07	1045	2112.67	2735.75	1214.75	1106.67	1392	3147.45	179	6525.75	396.2	612.833	133.75	12	3.33333	4.66667	6	6.66667	3.5	1	#DIV/0!	#DIV/0!	2.33333	2.66667	#DIV/0!	#DIV/0!	#DIV/0!	#DIV/0!	1	2	2	1	#DIV/0!	#DIV/0!	3
GJ3	65	WT	E0	16.6667	0	70.8333	12.5	0.708333	24	4	0	17	3	0.85	956.615	#DIV/0!	1035.62	595	247.645	267.276	169.75	128.15	126.457	141.25	702.077	782.924	258.25	34.6667	11.6667	20	3	17	9.33333	2.66667	#DIV/0!	#DIV/0!	5.66667	6.66667	2.66667	1	#DIV/0!	#DIV/0!	3	9	5.66667	2.33333	#DIV/0!	#DIV/0!	3
GG1	65	+ve	E0	0	0	83.3333	16.6667	0.833333	24	0	0	20	4	0.833333	263.25	#DIV/0!	265.31	250.667	121.792	122.551	70.8333	187.042	198.15	142	123.458	120.975	106.5	35	15	17	4.5	12.3333	9.33333	2.5	#DIV/0!	1.5	10.6667	8	2	1	#DIV/0!	1	4.66667	4	6.66667	1.5	#DIV/0!	1	4.66667
GG2	60	+ve	E0	41.6667	4.16667	45.8333	8.33333	0.458333	24	10	1	11	2	0.846154	1334.06	68	1434.89	1613.5	158.056	150.978	260	731.25	840.444	135.5	478.417	530.756	199	17.3333	7.33333	5	5	7.33333	6.33333	2	#DIV/0!	1	3	4.66667	3	1	#DIV/0!	#DIV/0!	1	1	3.66667	1.5	#DIV/0!	#DIV/0!	#DIV/0!
WT	10	Mean	#DIV/0!	29.1667	4.58333	55.8333	10.4167	0.558333	24	7	1.1	13.4	2.5	0.780314	1170.08	#DIV/0!	1167.91	#DIV/0!	463.595	422.913	#DIV/0!	517.703	545.772	#DIV/0!	389.182	474.248	#DIV/0!	34.0333	13.2	17.6333	#DIV/0!	10.3	8.9	#DIV/0!	#DIV/0!	#DIV/0!	10.7	5.8	3.91667	#DIV/0!	#DIV/0!	#DIV/0!	#DIV/0!	#DIV/0!	4.9	#DIV/0!	#DIV/0!	#DIV/0!	#DIV/0!
Grb10	13	Mean	#DIV/0!	12.1795	0.961538	71.1538	15.7051	0.708333	24	2.92308	0.230769	17.0769	3.76923	0.803615	827.933	#DIV/0!	809.827	#DIV/0!	258.04	233.804	#DIV/0!	842.043	493.139	#DIV/0!	455.6	518.568	#DIV/0!	28.9231	11.2821	13.2308	#DIV/0!	10.4615	8.78205	2.80769	#DIV/0!	#DIV/0!	#DIV/0!	7.02564	#DIV/0!	#DIV/0!	#DIV/0!	#DIV/0!	#DIV/0!	#DIV/0!	5.74359	#DIV/0!	#DIV/0!	#DIV/0!	#DIV/0!
		SE	#DIV/0!	9.60244	2.27795	10.7977	3.35927	0.107977	0	2.30458	0.546707	2.59144	0.806226	0.0602688	242.898	#DIV/0!	240.864	#DIV/0!	129.343	137.928	#DIV/0!	174.276	175.621	#DIV/0!	91.4341	118.974	#DIV/0!	10.023	4.10636	6.13338	#DIV/0!	1.7338	2.20832	#DIV/0!	#DIV/0!	#DIV/0!	4.15605	0.720425	1.69626	#DIV/0!	#DIV/0!	#DIV/0!	#DIV/0!	#DIV/0!	0.706321	#DIV/0!	#DIV/0!	#DIV/0!	#DIV/0!
		SE	#DIV/0!	5.72903	0.506775	6.7295	3.37428	0.0702075	0	1.37497	0.121626	1.61508	0.809826	0.0410098	159.414	#DIV/0!	166.176	#DIV/0!	87.6651	79.0152	#DIV/0!	276.5	155.751	#DIV/0!	78.0791	92.103	#DIV/0!	3.37456	1.17053	1.92205	#DIV/0!	0.964866	0.649727	1.00211	#DIV/0!	#DIV/0!	#DIV/0!	0.458322	#DIV/0!	#DIV/0!	#DIV/0!	#DIV/0!	#DIV/0!	#DIV/0!	0.505178	#DIV/0!	#DIV/0!	#DIV/0!	#DIV/0!
Choice - B3
GB0	60	WT	E0	25	0	66.6667	8.33333	0.666667	24	6	0	16	2	0.888889	994.135	#DIV/0!	1100.61	524	183.367	168.617	353	649.403	699.348	215	125.821	114.543	229.5	23.3333	9	11	5	11.3333	7	1.66667	#DIV/0!	#DIV/0!	5	6	3	2	#DIV/0!	#DIV/0!	2	5	5.33333	1	#DIV/0!	#DIV/0!	#DIV/0!
GB1	65	WT	E0	58.3333	12.5	16.6667	12.5	0.166667	24	14	3	4	3	0.571429	1345.94	786.5	1629.33	1503	886.722	339.333	1559.67	1427.83	81	3881.33	534.611	876.333	106.333	9.33333	4.66667	3	1.66667	4.33333	3.33333	1	#DIV/0!	#DIV/0!	4	3.33333	1.5	#DIV/0!	#DIV/0!	#DIV/0!	1	1	1.33333	1	#DIV/0!	#DIV/0!	3
GF0	65	WT	E0	75	0	8.33333	16.6667	0.0833333	24	18	0	2	4	0.333333	2136.33	#DIV/0!	1594.5	2407.25	226.333	339.5	169.75	3301.67	1191.5	4356.75	74.5	25	99.25	7	2.66667	2.5	2.66667	3.33333	2.33333	1	#DIV/0!	#DIV/0!	3	2	1	#DIV/0!	#DIV/0!	#DIV/0!	1	#DIV/0!	2	1	#DIV/0!	#DIV/0!	2
GF1	65	WT	E0	62.5	4.16667	25	8.33333	0.25	24	15	1	6	2	0.75	901.306	1626	887.222	525.5	487.083	276.889	1357.5	9003.36	9626.17	2034.5	323.944	415.889	175	14	5.66667	3.66667	4.66667	4.33333	3.66667	1	#DIV/0!	3.5	3.33333	3	1.5	#DIV/0!	#DIV/0!	3	2	1	2	#DIV/0!	#DIV/0!	2	1
GC0	65	+ve	E0	58.3333	20.8333	16.6667	4.16667	0.166667	24	14	5	4	1	0.8	1833.62	1415	1872.5	3929	579	580.333	785	155.625	154.5	148	765.875	829.5	339	41.6667	12.6667	15.3333	13.6667	13	6	4	1	#DIV/0!	23	5	3.5	#DIV/0!	#DIV/0!	#DIV/0!	7	5	2	4	1	#DIV/0!	9
GC1	65	WT	E0	12.5	4.16667	70.8333	12.5	0.708333	24	3	1	17	3	0.85	808.629	1324	631.667	2202.75	272.905	269.222	249.75	154.849	152.944	151.75	162.746	163.067	132.75	26.3333	11.6667	12.6667	2	9.33333	10.3333	2	#DIV/0!	#DIV/0!	8	7	5.5	#DIV/0!	#DIV/0!	#DIV/0!	1.5	3.5	5.66667	1.5	#DIV/0!	#DIV/0!	5.5
GC2	65	+ve	E0	29.1667	0	58.3333	12.5	0.583333	24	7	0	14	3	0.823529	1579.94	#DIV/0!	1757.4	920	305.544	275.189	638.333	2981.96	3144.77	2270.67	87.127	70.2222	134	16.3333	7	7	2.33333	7.66667	6.33333	1	1	1	1	5.66667	2	#DIV/0!	#DIV/0!	#DIV/0!	1	1.5	4.66667	1	1	1	1
GC3	60	+ve	E0	0	0	100	0	1	24	0	0	24	0	1	769.25	#DIV/0!	769.25	#DIV/0!	92.2083	92.2083	#DIV/0!	85.7083	85.7083	#DIV/0!	744.875	744.875	#DIV/0!	33.3333	9.66667	23.6667	#DIV/0!	10.3333	9.66667	12.6667	1	#DIV/0!	#DIV/0!	8	2.5	#DIV/0!	#DIV/0!	#DIV/0!	#DIV/0!	7	8	12.6667	1	#DIV/0!	#DIV/0!
GE0	60	+ve	E0	0	0	87.5	12.5	0.875	24	0	0	21	3	0.875	655.833	#DIV/0!	601.81	1034	219.708	206.667	311	164.458	146.571	289.667	209.667	214.238	177.667	24	8.33333	13	2.66667	11	8.33333	1.66667	#DIV/0!	1	3.5	8	1	#DIV/0!	#DIV/0!	#DIV/0!	#DIV/0!	3.5	7	1.33333	#DIV/0!	1	3
GE1	60	+ve	E0	4.16667	4.16667	79.1667	12.5	0.791667	24	1	1	19	3	0.863636	675.411	75	717.544	596	296.417	226.417	699.25	78.006	55.725	211.5	525.423	573.986	257.5	19.3333	9	8.66667	2.5	8.66667	8.66667	2	#DIV/0!	#DIV/0!	#DIV/0!	7.66667	1.33333	#DIV/0!	#DIV/0!	#DIV/0!	#DIV/0!	1.5	6.33333	2	#DIV/0!	#DIV/0!	#DIV/0!
GE2	65	WT	E0	62.5	0	20.8333	16.6667	0.208333	24	15	0	5	4	0.555556	1807.06	#DIV/0!	1823.67	1115.25	170.917	109.167	198	1008.47	971.333	851.5	70.1667	44.5	82.5	13.6667	4	4	5.66667	8	3	1	#DIV/0!	6	1	3	#DIV/0!	1	#DIV/0!	2	#DIV/0!	1.66667	1.66667	#DIV/0!	#DIV/0!	1	1
GE3	60	+ve	E0	16.6667	4.16667	75	4.16667	0.75	24	4	1	18	1	0.947368	898.008	1476	863.713	719	226.357	173.257	1197	494.77	508.081	134	626.524	665.024	187	17.3333	8	8.33333	3	7.33333	7.66667	2.5	#DIV/0!	#DIV/0!	1	6.66667	2	#DIV/0!	#DIV/0!	#DIV/0!	#DIV/0!	1	6	2	#DIV/0!	#DIV/0!	1
GK1	65	WT	E0	50	4.16667	8.33333	4.16667	0.0833333	24	12	1	2	1	0.666667	1622.75	2961	1009	1512	727.333	141.5	1899	310.667	371.5	189	547	684.5	272	19	5.5	6	7.5	7	7	1	#DIV/0!	#DIV/0!	8	4	4	#DIV/0!	#DIV/0!	#DIV/0!	1.5	3	2	1	#DIV/0!	#DIV/0!	3
GK3	65	+ve	E0	4.16667	4.16667	58.3333	33.3333	0.583333	24	1	1	14	8	0.636364	365.494	154	477.217	308	160.851	135.817	194.111	266.75	334.017	162.722	35.8393	29.1	49.5	50.3333	17.6667	22.3333	10.3333	12.3333	10.6667	2.66667	2	5	20.6667	7.66667	3.33333	#DIV/0!	#DIV/0!	1	6	2.66667	4.66667	2.66667	2	3	9.66667
GK4	60	+ve	E0	45.8333	4.16667	20.8333	29.1667	0.208333	24	11	1	5	7	0.416667	1666.23	1548	2061.67	1115.92	151.306	130	166.417	4180.17	3116.83	5092.25	256.083	189	322.5	12.3333	5	3.33333	4	7	4.33333	#DIV/0!	#DIV/0!	1	1	4.33333	1	#DIV/0!	#DIV/0!	1	#DIV/0!	1.33333	1.66667	#DIV/0!	#DIV/0!	1	#DIV/0!
GA0	65	WT	E0	0	4.16667	95.8333	0	0.958333	24	0	1	23	0	1	395.5	1169	367.631	#DIV/0!	219.637	219.637	#DIV/0!	125.75	125.75	#DIV/0!	756.554	756.554	#DIV/0!	81	37.3333	43.6667	#DIV/0!	11.3333	31	28.3333	6.33333	1	11	8	23.3333	4.5	1	#DIV/0!	7	3.33333	7.66667	25.3333	5.66667	1	4
GA1	60	WT	E0	4.16667	0	91.6667	4.16667	0.916667	24	1	0	22	1	0.956522	848.815	#DIV/0!	898.905	300	263.363	274.643	96	149.446	153.714	56	239.708	238.018	241	29	13	13.6667	2.33333	11.3333	10.3333	1.66667	#DIV/0!	2	7.5	7.66667	2.66667	#DIV/0!	#DIV/0!	1	7	3.66667	7.33333	1.66667	#DIV/0!	#DIV/0!	1.5
GA2	60	+ve	E0	0	0	91.6667	8.33333	0.916667	24	0	0	22	2	0.916667	567.833	#DIV/0!	576.583	351.5	144.042	147.22	56	97.9167	58.875	524.5	788.167	836.81	245	25.3333	9.66667	12.3333	3.33333	13	9	1.66667	1	1	1	8	1.5	#DIV/0!	#DIV/0!	#DIV/0!	1	4.33333	7.33333	1	#DIV/0!	#DIV/0!	#DIV/0!
GJ1	65	+ve	E0	33.3333	4.16667	58.3333	4.16667	0.583333	24	8	1	14	1	0.933333	1298.94	3635	1215.54	303	372.625	354.458	459	1422.61	1506	722	27.375	29.375	11	14.3333	7.66667	6.33333	1	5.66667	7	1.33333	#DIV/0!	#DIV/0!	1	5.33333	3	#DIV/0!	#DIV/0!	#DIV/0!	1	1	4.66667	1.33333	#DIV/0!	#DIV/0!	#DIV/0!
GJ2	65	+ve	E0	83.3333	4.16667	8.33333	4.16667	0.0833333	24	20	1	2	1	0.666667	2309	1987	1243	3127	909.75	980.5	839	722	1275	169	144.75	26.5	263	7	2.5	5	2	3.33333	2	1	#DIV/0!	#DIV/0!	1.66667	2	1	#DIV/0!	#DIV/0!	#DIV/0!	#DIV/0!	2.5	2	1	#DIV/0!	#DIV/0!	1
GJ3	65	WT	E0	25	8.33333	54.1667	12.5	0.541667	24	6	2	13	3	0.8125	1360.83	1219	1114.87	1314	319.333	287.511	450	152.422	170.711	132.5	609.344	672.733	204	45.6667	11.6667	30.6667	5	25	7.66667	3.33333	2	#DIV/0!	9	6	3.5	#DIV/0!	#DIV/0!	#DIV/0!	5	18	4.33333	3	2	#DIV/0!	4.66667
GG1	65	+ve	E0	8.33333	4.16667	79.1667	8.33333	0.791667	24	2	1	19	2	0.904762	866.472	3487	719.458	1205.5	229.283	124.363	958.5	118.575	117.56	97	137.017	151.345	58	20	7.33333	11.3333	2	11.6667	7	1	#DIV/0!	#DIV/0!	1	7.33333	#DIV/0!	#DIV/0!	#DIV/0!	#DIV/0!	#DIV/0!	3.66667	6.33333	1	#DIV/0!	#DIV/0!	1
GG2	60	+ve	E0	66.6667	8.33333	25	0	0.25	24	16	2	6	0	1	2447.53	3448	1716.33	#DIV/0!	245.333	245.333	#DIV/0!	7271.33	7271.33	#DIV/0!	415.167	415.167	#DIV/0!	14	5.33333	4.33333	4.33333	6	3	1.5	#DIV/0!	9	1.5	2.66667	1.5	#DIV/0!	#DIV/0!	4	1	2	3	1.5	#DIV/0!	#DIV/0!	#DIV/0!
WT	10	Mean	#DIV/0!	37.5	3.75	45.8333	9.58333	0.458333	24	9	0.9	11	2.3	0.738489	1222.13	#DIV/0!	1105.74	#DIV/0!	375.699	242.602	#DIV/0!	1628.39	1354.4	#DIV/0!	344.44	399.114	#DIV/0!	26.8333	10.5167	13.0833	#DIV/0!	9.53333	8.56667	4.2	#DIV/0!	#DIV/0!	5.98333	5	#DIV/0!	#DIV/0!	#DIV/0!	#DIV/0!	#DIV/0!	#DIV/0!	3.93333	#DIV/0!	#DIV/0!	#DIV/0!	#DIV/0!
Grb10	13	Mean	#DIV/0!	26.9231	4.48718	58.3333	10.2564	0.583333	24	6.46154	1.07692	14	2.46154	0.829538	1225.66	#DIV/0!	1122.46	#DIV/0!	302.494	282.443	#DIV/0!	1387.68	1367.31	#DIV/0!	366.453	367.319	#DIV/0!	22.7179	8.44872	10.8462	#DIV/0!	9	6.89744	#DIV/0!	#DIV/0!	#DIV/0!	#DIV/0!	6.02564	#DIV/0!	#DIV/0!	#DIV/0!	#DIV/0!	#DIV/0!	2.84615	4.89744	#DIV/0!	#DIV/0!	#DIV/0!	#DIV/0!
		SE	#DIV/0!	8.62901	1.31028	10.7762	1.7623	0.107762	0	2.07096	0.314466	2.58629	0.422953	0.0655976	167.383	#DIV/0!	145.22	#DIV/0!	78.1135	25.3205	#DIV/0!	876.257	927.41	#DIV/0!	78.7046	102.223	#DIV/0!	6.99599	3.19243	4.32615	#DIV/0!	1.97278	2.65927	2.69164	#DIV/0!	#DIV/0!	1.00199	0.690321	#DIV/0!	#DIV/0!	#DIV/0!	#DIV/0!	#DIV/0!	#DIV/0!	0.772682	#DIV/0!	#DIV/0!	#DIV/0!	#DIV/0!
		SE	#DIV/0!	7.93121	1.52595	8.62213	2.85478	0.0862213	0	1.90349	0.366227	2.06931	0.685148	0.0463035	189.567	#DIV/0!	154.571	#DIV/0!	61.1694	68.2962	#DIV/0!	605.286	580.17	#DIV/0!	80.7308	89.339	#DIV/0!	3.42748	1.03524	1.7953	#DIV/0!	0.865614	0.71151	#DIV/0!	#DIV/0!	#DIV/0!	#DIV/0!	0.572968	#DIV/0!	#DIV/0!	#DIV/0!	#DIV/0!	#DIV/0!	0.498738	0.600788	#DIV/0!	#DIV/0!	#DIV/0!	#DIV/0!
[truncated: 103 more columns]

## Sheet: E3-first
Grb10 - DelRei									First E3 session				Delays are : Adjusted=1s, non-adjusted=1s in all blocks									FE0F										The following data are responses/zone (as in parts of each trial):								Z0:Initiation Stimulus on, Z1: Choice stimuli on, Z2: in delay to reward, Z3:Reward delivery, Z4: In ITI
																	All latencines are in s				All latencines are in s				All latencines are in s
				% Responses				All		Responses				% (AD/NA)	Latency to Initiate (CP)				Latency to respond (NP)			Latency to collect			Duration of first eat (PP)			Number of NPs				All NPs						Centre NPs only						Adjusted NPs only
Subject	Session	Gtype	Task	DNS	Omits	AD	NA	Bias	Trials	DNS	Omits	AD	NA	Bias	All	Omits	AD	NA	All	AD	NA	All	AD	NA	All	AD	NA	All	Centre	AD	NA	0	1	2	3	4	5	0	1	2	3	4	5	0	1	2	3	4	5
Choice - B1		C1
GB0	40	WT	E3	0	0	100	0	1	8	0	0	8	0	1	166.625	0	166.625	0	113.75	113.75	0	1206.62	1206.62	0	50.75	50.75	0	26	15	10	1	9	13	0	0	0	4	8	5	0	0	0	2	0	8	0	0	0	2
GB1	48	WT	E3	12.5	0	75	12.5	0.75	8	1	0	6	1	0.857143	1111.57	0	1245.33	309	761.286	823.833	386	53.5714	51.5	66	1477.29	1640	501	16	9	6	1	7	9	0	0	0	0	7	2	0	0	0	0	0	6	0	0	0	0
GF0	48	WT	E3	0	0	12.5	87.5	0.125	8	0	0	1	7	0.125	599.375	0	294	643	91.875	41	99.1429	174	667	103.571	258.5	385	240.429	47	15	15	17	17	9	4	1	0	16	8	1	0	0	0	6	7	1	1	1	0	5
GF1	48	WT	E3	0	0	62.5	37.5	0.625	8	0	0	5	3	0.625	159.875	0	142.6	188.667	182.625	197.6	157.667	59.75	51.4	73.6667	879.125	1074.8	553	41	19	14	8	8	11	2	0	0	20	8	3	0	0	0	8	0	5	1	0	0	8
GC0	48	+ve	E3	0	0	50	50	0.5	8	0	0	4	4	0.5	474.125	0	487	461.25	572.375	450.5	694.25	98.75	84	113.5	951.75	1293	610.5	47	16	18	13	13	12	1	1	0	20	8	4	1	1	0	2	0	4	0	0	0	14
GC1	48	WT	E3	0	0	87.5	12.5	0.875	8	0	0	7	1	0.875	478.625	0	504.857	295	244.375	231.143	337	559.375	624.714	102	36.875	37.1429	35	28	15	12	1	9	11	4	0	0	4	8	3	0	0	0	4	1	7	4	0	0	0
GC2	48	+ve	E3	0	0	100	0	1	8	0	0	8	0	1	125.75	0	125.75	0	46.375	46.375	0	297.875	297.875	0	448	448	0	23	13	8	2	8	10	0	0	0	5	8	2	0	0	0	3	0	8	0	0	0	0
GC3	40	+ve	E3	0	0	100	0	1	8	0	0	8	0	1	148.625	0	148.625	0	36	36	0	63.25	63.25	0	1494.25	1494.25	0	32	9	23	0	8	9	14	1	0	0	8	1	0	0	0	0	0	8	14	1	0	0
GE0	40	+ve	E3	0	0	87.5	12.5	0.875	8	0	0	7	1	0.875	214.25	0	207	265	69.875	71.1429	61	70.875	71.5714	66	334.25	335	329	23	9	13	1	8	8	1	0	0	6	8	0	0	0	0	1	0	7	1	0	0	5
GE1	40	+ve	E3	0	0	100	0	1	8	0	0	8	0	1	67.125	0	67.125	0	55.875	55.875	0	1601.12	1601.12	0	350	350	0	23	9	14	0	8	8	1	0	0	6	8	0	0	0	0	1	0	8	1	0	0	5
GE2	48	WT	E3	0	0	75	25	0.75	8	0	0	6	2	0.75	468.5	0	563.833	182.5	62	33.6667	147	529.75	678.833	82.5	53.25	40.5	91.5	38	13	18	7	14	8	2	0	0	14	8	0	1	0	0	4	3	6	1	0	0	8
GE3	40	+ve	E3	0	0	75	25	0.75	8	0	0	6	2	0.75	104.25	0	105.667	100	103.875	116.833	65	784.625	850.167	588	317.5	420.833	7.5	25	9	14	2	13	9	1	0	1	1	8	1	0	0	0	0	5	6	1	0	1	1
GK1	48	WT	E3	0	0	62.5	37.5	0.625	8	0	0	5	3	0.625	1115.88	0	411.4	2290	356.5	340	384	61.75	57	69.6667	1064.12	1277.2	709	30	10	11	9	15	9	4	0	0	2	8	1	0	0	0	1	4	5	2	0	0	0
GK3	48	+ve	E3	0	0	100	0	1	8	0	0	8	0	1	147.75	0	147.75	0	95.625	95.625	0	76	76	0	592.25	592.25	0	30	11	16	3	10	9	0	0	0	11	8	1	0	0	0	2	1	8	0	0	0	7
GK4	40	+ve	E3	0	0	100	0	1	8	0	0	8	0	1	389.25	0	389.25	0	104.25	104.25	0	104.5	104.5	0	1160.12	1160.12	0	98	32	66	0	17	22	28	4	0	27	8	14	0	0	0	10	9	8	28	4	0	17
GA0	48	WT	E3	0	0	87.5	12.5	0.875	8	0	0	7	1	0.875	396.25	0	432.143	145	116.625	125.286	56	54.25	49.5714	87	275.5	268.714	323	34	12	17	5	14	8	1	0	3	8	8	0	0	0	0	4	6	7	0	0	0	4
GA1	40	WT	E3	0	0	75	25	0.75	8	0	0	6	2	0.75	128.625	0	148.833	68	111.75	127.667	64	39.5	36.8333	47.5	880.5	1075.33	296	28	11	15	2	8	8	2	0	0	10	8	0	1	0	0	2	0	6	1	0	0	8
GA2	40	+ve	E3	0	0	100	0	1	8	0	0	8	0	1	242.625	0	242.625	0	60.5	60.5	0	460.75	460.75	0	44.625	44.625	0	20	10	10	0	8	8	0	0	0	4	8	0	0	0	0	2	0	8	0	0	0	2
GJ1	48	+ve	E3	0	0	75	25	0.75	8	0	0	6	2	0.75	191.5	0	149	319	85	92.1667	63.5	360.375	211.333	807.5	530.5	700.5	20.5	33	15	12	6	9	12	2	0	1	9	8	4	0	0	0	3	0	6	2	0	1	3
GJ2	48	+ve	E3	12.5	0	87.5	0	0.875	8	1	0	7	0	1	1784.71	0	1784.71	0	421.143	421.143	0	115.286	115.286	0	989.429	989.429	0	36	11	22	3	17	9	1	0	0	9	7	2	0	0	0	2	8	7	1	0	0	6
GJ3	48	WT	E3	0	0	87.5	12.5	0.875	8	0	0	7	1	0.875	826.375	0	651.714	2049	183.5	161.286	339	470.125	509	198	26	27.8571	13	33	11	20	2	20	10	3	0	0	0	8	2	1	0	0	0	11	7	2	0	0	0
GG1	48	+ve	E3	0	0	100	0	1	8	0	0	8	0	1	190.625	0	190.625	0	96.625	96.625	0	92.125	92.125	0	510.375	510.375	0	43	21	15	7	9	11	2	0	0	21	8	3	0	0	0	10	0	8	2	0	0	5
GG2	40	+ve	E3	0	0	100	0	1	8	0	0	8	0	1	178.625	0	178.625	0	55.25	55.25	0	81.875	81.875	0	1045.62	1045.62	0	28	13	15	0	8	9	2	0	0	9	8	1	0	0	0	4	0	8	2	0	0	5
WT	10		Mean	1.25	0	72.5	26.25	0.725	8	0.1	0	5.8	2.1	0.735714	545.17	0	456.134	617.017	222.429	219.523	196.981	320.87	393.248	82.9905	500.191	587.73	276.193	32.1	13	13.8	5.3	12.1	9.6	2.2	0.1	0.3	7.8	7.9	1.7	0.3	0	0	3.1	3.2	5.8	1.2	0.1	0	3.5
Grb10	13		Mean	0.961538	0	90.3846	8.65385	0.903846	8	0.0769231	0	7.23077	0.692308	0.913462	327.632	0	324.904	88.0962	138.674	130.945	67.9808	323.647	316.143	121.154	674.514	721.847	74.4231	35.4615	13.6923	18.9231	2.84615	10.4615	10.4615	4.07692	0.461538	0.153846	9.84615	7.92308	2.53846	0.0769231	0.0769231	0	3.07692	1.76923	7.23077	4	0.384615	0.153846	5.38462
			SE	1.25	0	7.63763	7.78398	0.0763763	0	0.1	0	0.61101	0.622718	0.0775091	116.727	0	104.375	265.119	65.8247	72.9255	47.1942	119.534	128.102	15.8915	167.037	194.506	78.6118	2.73841	0.954521	1.31487	1.62652	1.41774	0.520683	0.489898	0.1	0.3	2.22011	0.1	0.517472	0.152753	0	0	0.822598	1.2	0.61101	0.38873	0.1	0	1.12793
			SE	0.961538	0	4.28218	4.33582	0.0428218	0	0.0769231	0	0.342574	0.346865	0.0433582	125.342	0	125.809	43.4007	45.3267	38.1664	52.7381	121.749	123.883	72.6875	115.265	120.508	51.23	5.67226	1.813	4.09262	1.06124	0.944725	1.03537	2.23739	0.312463	0.104154	2.24707	0.0769231	1.02916	0.0769231	0.0769231	0	0.909082	0.913951	0.342574	2.24751	0.310881	0.104154	1.40301
Choice - B2		C2
GB0	40	WT	E3	0	0	87.5	12.5	0.875	8	0	0	7	1	0.875	141.875	0	133.286	202	73.125	77.8571	40	1379.5	1532.14	311	41.625	40.8571	47	34	18	11	5	8	9	3	0	6	8	8	1	1	0	2	6	0	7	2	0	2	0
GB1	48	WT	E3	100	0	0	0	0	8	8	0	0	0	0	0	0	0	0	0	0	0	0	0	0	0	0	0	2	0	0	2	2	0	0	0	0	0	0	0	0	0	0	0	0	0	0	0	0	0
GF0	48	WT	E3	87.5	0	12.5	0	0.125	8	7	0	1	0	1	1089	0	1089	0	142	142	0	850	850	0	99	99	0	7	1	5	1	2	1	4	0	0	0	1	0	0	0	0	0	1	1	3	0	0	0
GF1	48	WT	E3	0	0	87.5	12.5	0.875	8	0	0	7	1	0.875	372	0	405.571	137	289.125	265	458	103.875	111.571	50	1001.88	1077	476	38	16	20	2	15	11	6	0	0	6	8	3	2	0	0	3	7	7	3	0	0	3
GC0	48	+ve	E3	12.5	12.5	62.5	12.5	0.625	8	1	1	5	1	0.833333	868	83	1104.2	472	468.5	289.2	1365	96.6667	95.2	104	1235.17	1384.4	489	58	20	22	16	9	11	8	0	0	30	7	5	0	0	0	8	0	5	7	0	0	10
GC1	48	WT	E3	0	25	75	0	0.75	8	0	2	6	0	1	1430.12	1566	1384.83	0	303	303	0	16046.5	16046.5	0	54.1667	54.1667	0	20	10	9	1	9	7	3	0	1	0	8	1	1	0	0	0	1	6	2	0	0	0
GC2	48	+ve	E3	0	0	87.5	12.5	0.875	8	0	0	7	1	0.875	409.625	0	433.714	241	69.5	57.8571	151	319.25	347.714	120	498.25	531.857	263	18	10	7	1	8	9	0	0	0	1	8	1	0	0	0	1	0	7	0	0	0	0
GC3	40	+ve	E3	12.5	0	87.5	0	0.875	8	1	0	7	0	1	348.143	0	348.143	0	88.2857	88.2857	0	80.8571	80.8571	0	1640.71	1640.71	0	33	10	23	0	7	7	16	0	0	3	7	0	0	0	0	3	0	7	16	0	0	0
GE0	40	+ve	E3	0	0	87.5	12.5	0.875	8	0	0	7	1	0.875	205.25	0	202.571	224	69.75	71	61	149.875	155.571	110	328.625	350.286	177	22	10	11	1	8	9	5	0	0	0	8	1	1	0	0	0	0	7	4	0	0	0
GE1	40	+ve	E3	0	0	87.5	12.5	0.875	8	0	0	7	1	0.875	339.625	0	372.714	108	73.875	63.1429	149	117.125	117.429	115	944.25	1038.86	282	20	9	10	1	9	9	2	0	0	0	8	1	0	0	0	0	1	7	2	0	0	0
GE2	48	WT	E3	0	0	100	0	1	8	0	0	8	0	1	426	0	426	0	65.125	65.125	0	469.875	469.875	0	40.875	40.875	0	47	16	20	11	12	9	9	0	0	17	8	1	1	0	0	6	1	8	6	0	0	5
GE3	40	+ve	E3	0	0	87.5	12.5	0.875	8	0	0	7	1	0.875	140.25	0	145.143	106	132.625	127.857	166	167.625	176	109	1049.88	1129.71	491	20	9	10	1	10	9	0	0	0	1	8	1	0	0	0	0	2	7	0	0	0	1
GK1	48	WT	E3	25	12.5	50	12.5	0.5	8	2	1	4	1	0.8	1182	948	1186.75	1397	725.8	678.25	916	158.8	175.25	93	1196.4	1325.25	681	32	15	12	5	12	13	5	0	0	2	6	8	0	0	0	1	2	4	5	0	0	1
GK3	48	+ve	E3	0	0	87.5	12.5	0.875	8	0	0	7	1	0.875	707.5	0	562.571	1722	181.125	136	497	94.25	94.8571	90	596.25	641.714	278	17	8	8	1	9	8	0	0	0	0	8	0	0	0	0	0	1	7	0	0	0	0
GK4	40	+ve	E3	0	0	100	0	1	8	0	0	8	0	1	525.875	0	525.875	0	101.875	101.875	0	104.125	104.125	0	1033	1033	0	64	26	38	0	8	16	40	0	0	0	8	8	10	0	0	0	0	8	30	0	0	0
GA0	48	WT	E3	0	0	87.5	12.5	0.875	8	0	0	7	1	0.875	592.875	0	677.143	3	153.5	154.143	149	148.25	160.143	65	384.75	401.286	269	21	12	8	1	9	12	0	0	0	0	8	4	0	0	0	0	1	7	0	0	0	0
GA1	40	WT	E3	0	0	87.5	12.5	0.875	8	0	0	7	1	0.875	371.375	0	411	94	45.5	45	49	102.625	106.571	75	1002	1103.86	289	22	11	9	2	10	9	0	0	0	3	8	1	0	0	0	2	1	7	0	0	0	1
GA2	40	+ve	E3	0	0	100	0	1	8	0	0	8	0	1	284.875	0	284.875	0	69.25	69.25	0	867.375	867.375	0	40.75	40.75	0	17	9	8	0	8	9	0	0	0	0	8	1	0	0	0	0	0	8	0	0	0	0
GJ1	48	+ve	E3	12.5	12.5	25	50	0.25	8	1	1	2	4	0.333333	1027	2251	375	1047	155.333	271	97.5	56.3333	98.5	35.25	570.333	882.5	414.25	19	9	5	5	7	7	4	0	0	1	7	1	1	0	0	0	0	2	3	0	0	0
GJ2	48	+ve	E3	25	0	62.5	12.5	0.625	8	2	0	5	1	0.833333	1025.17	0	716.4	2569	114.667	124.6	65	151.333	160.6	105	1000.83	1029.8	856	41	9	29	3	16	6	12	0	0	7	6	0	1	0	0	2	10	5	11	0	0	3
GJ3	48	WT	E3	100	0	0	0	0	8	8	0	0	0	0	0	0	0	0	0	0	0	0	0	0	0	0	0	2	1	1	0	1	0	0	0	0	1	0	0	0	0	0	1	1	0	0	0	0	0
GG1	48	+ve	E3	0	0	100	0	1	8	0	0	8	0	1	646.25	0	646.25	0	228.375	228.375	0	154.75	154.75	0	529.75	529.75	0	24	13	9	2	8	10	3	0	0	3	8	2	0	0	0	3	0	8	1	0	0	0
GG2	40	+ve	E3	87.5	0	12.5	0	0.125	8	7	0	1	0	1	976	0	976	0	56	56	0	442	442	0	834	834	0	3	1	2	0	1	1	1	0	0	0	1	0	0	0	0	0	0	1	1	0	0	0
WT	10		Mean	31.25	3.75	58.75	6.25	0.5875	8	2.5	0.3	4.7	0.5	0.73	560.525	251.4	571.358	183.3	179.718	173.037	161.2	1925.94	1945.21	59.4	382.069	414.229	176.2	22.5	10	9.5	3	8	7.1	3	0	0.7	3.7	5.5	1.9	0.5	0	0.2	1.9	1.5	4.7	2.1	0	0.2	1
Grb10	13		Mean	11.5385	1.92308	75.9615	10.5769	0.759615	8	0.923077	0.153846	6.07692	0.846154	0.875	577.197	179.538	514.881	499.154	139.166	129.573	196.269	215.505	222.691	60.6346	792.446	851.334	250.019	27.3846	11	14	2.38462	8.30769	8.53846	7	0	0	3.53846	7.07692	1.61538	1	0	0	1.30769	1.07692	6.07692	5.76923	0	0	1.07692
			SE	14.3433	2.66797	12.645	2.08333	0.12645	0	1.14746	0.213437	1.0116	0.166667	0.123536	160.41	173.815	157.717	136.79	69.4893	64.8836	95.1705	1575.2	1574.18	30.2648	154.328	169.835	77.3135	4.89047	2.18072	2.14606	1.0328	1.52023	1.57374	0.977525	0	0.597216	1.7195	1.14746	0.795124	0.223607	0	0.2	0.752034	0.636832	1.0116	0.690411	0	0.2	0.537484
			SE	6.70784	1.30193	7.81158	3.70328	0.0781158	0	0.536627	0.104154	0.624926	0.296262	0.049029	88.5314	172.739	79.3202	223.265	30.8847	22.6206	104.374	61.799	61.3823	14.9774	116.89	119.925	72.9077	4.81256	1.68325	2.95045	1.20117	0.879865	0.924145	3.08221	0	0	2.27477	0.536627	0.645879	0.759555	0	0	0.64435	0.76344	0.624926	2.43414	0	0	0.780052
Choice - B3		C3
GB0	40	WT	E3	0	0	100	0	1	8	0	0	8	0	1	608.625	0	608.625	0	205.375	205.375	0	1649.88	1649.88	0	72	72	0	39	16	16	7	9	11	4	0	15	0	8	3	0	0	5	0	1	8	4	0	3	0
GB1	48	WT	E3	87.5	0	12.5	0	0.125	8	7	0	1	0	1	3090	0	3090	0	771	771	0	183	183	0	1259	1259	0	5	2	3	0	3	2	0	0	0	0	1	1	0	0	0	0	2	1	0	0	0	0
GF0	48	WT	E3	75	0	0	25	0	8	6	0	0	2	0	1335.5	0	0	1335.5	320.5	0	320.5	154.5	0	154.5	139.5	0	139.5	8	3	0	5	5	3	0	0	0	0	2	1	0	0	0	0	0	0	0	0	0	0
GF1	48	WT	E3	37.5	0	37.5	25	0.375	8	3	0	3	2	0.6	863.6	0	756.333	1024.5	243	63.6667	512	125	153	83	850.8	1125	439.5	20	9	6	5	7	6	7	0	0	0	5	1	3	0	0	0	1	3	2	0	0	0
GC0	48	+ve	E3	75	0	12.5	12.5	0.125	8	6	0	1	1	0.5	1325.5	0	851	1800	495.5	256	735	216	239	193	801.5	1189	414	35	8	10	17	17	2	0	0	0	16	2	0	0	0	0	6	4	1	0	0	0	5
GC1	48	WT	E3	50	12.5	0	37.5	0	8	4	1	0	3	0	1851.75	2069	0	1779.33	1284	0	1284	1329.33	0	1329.33	9.33333	0	9.33333	11	5	1	5	5	4	2	0	0	0	4	1	0	0	0	0	1	0	0	0	0	0
GC2	48	+ve	E3	0	0	87.5	12.5	0.875	8	0	0	7	1	0.875	661.75	0	467.714	2020	115.25	49.2857	577	407.375	428.571	259	686.375	757.714	187	22	8	12	2	10	8	2	0	0	2	8	0	0	0	0	0	1	7	2	0	0	2
GC3	40	+ve	E3	0	12.5	87.5	0	0.875	8	0	1	7	0	1	1050.75	1570	976.571	0	104.714	104.714	0	81.2857	81.2857	0	1541.71	1541.71	0	26	9	17	0	9	8	9	0	0	0	8	1	0	0	0	0	1	7	9	0	0	0
GE0	40	+ve	E3	0	0	75	25	0.75	8	0	0	6	2	0.75	192.375	0	171.333	255.5	61.625	69.8333	37	136.125	124.167	172	131	78.6667	288	27	11	14	2	10	9	8	0	0	0	8	1	2	0	0	0	2	6	6	0	0	0
GE1	40	+ve	E3	25	0	62.5	12.5	0.625	8	2	0	5	1	0.833333	1937.5	0	2092.8	1161	606.5	509.6	1091	420	481.8	111	929.5	1065.2	251	17	7	8	2	7	7	3	0	0	0	6	1	0	0	0	0	0	5	3	0	0	0
GE2	48	WT	E3	12.5	0	12.5	75	0.125	8	1	0	1	6	0.142857	1323.86	0	432	1472.5	150.286	121	155.167	407.571	1356	249.5	26.4286	47	23	27	9	7	11	17	8	1	0	0	1	7	1	1	0	0	0	5	1	0	0	0	1
GE3	40	+ve	E3	12.5	0	87.5	0	0.875	8	1	0	7	0	1	197.429	0	197.429	0	76.2857	76.2857	0	116.571	116.571	0	893	893	0	15	7	8	0	7	7	1	0	0	0	7	0	0	0	0	0	0	7	1	0	0	0
GK1	48	WT	E3	87.5	0	12.5	0	0.125	8	7	0	1	0	1	3742	0	3742	0	1514	1514	0	190	190	0	871	871	0	16	3	13	0	11	3	1	0	0	1	1	2	0	0	0	0	10	1	1	0	0	1
GK3	48	+ve	E3	62.5	12.5	25	0	0.25	8	5	1	2	0	1	1506	1334	1592	0	91.5	91.5	0	322.5	322.5	0	536.5	536.5	0	7	3	4	0	5	2	0	0	0	0	3	0	0	0	0	0	2	2	0	0	0	0
GK4	40	+ve	E3	12.5	0	87.5	0	0.875	8	1	0	7	0	1	873.143	0	873.143	0	117.286	117.286	0	155.286	155.286	0	1083	1083	0	46	14	32	0	7	11	28	0	0	0	7	4	3	0	0	0	0	7	25	0	0	0
GA0	48	WT	E3	12.5	0	50	37.5	0.5	8	1	0	4	3	0.571429	824.571	0	1159.5	378	126.143	171.25	66	113.857	133	88.3333	447.571	590.25	257.333	20	11	6	3	8	11	0	0	0	1	7	4	0	0	0	0	1	4	0	0	0	1
GA1	40	WT	E3	12.5	0	62.5	25	0.625	8	1	0	5	2	0.714286	1248.43	0	1408.4	848.5	484	595.4	205.5	111.143	128	69	830.714	1038.6	311	26	13	10	3	8	11	1	1	0	5	7	4	0	1	0	1	1	5	1	0	0	3
GA2	40	+ve	E3	12.5	0	87.5	0	0.875	8	1	0	7	0	1	886.571	0	886.571	0	122.286	122.286	0	1092.43	1092.43	0	30	30	0	19	10	9	0	7	10	2	0	0	0	7	3	0	0	0	0	0	7	2	0	0	0
GJ1	48	+ve	E3	37.5	25	37.5	0	0.375	8	3	2	3	0	1	1943.8	1471.5	2258.67	0	782.667	782.667	0	5014	5014	0	435.333	435.333	0	18	6	7	5	9	4	3	0	0	2	5	1	0	0	0	0	2	3	2	0	0	0
GJ2	48	+ve	E3	37.5	0	62.5	0	0.625	8	3	0	5	0	1	630.4	0	630.4	0	257.6	257.6	0	115.8	115.8	0	984.8	984.8	0	26	10	11	5	7	9	8	0	0	2	5	4	1	0	0	0	0	5	6	0	0	0
GJ3	48	WT	E3	100	0	0	0	0	8	8	0	0	0	0	0	0	0	0	0	0	0	0	0	0	0	0	0	3	0	2	1	3	0	0	0	0	0	0	0	0	0	0	0	2	0	0	0	0	0
GG1	48	+ve	E3	25	0	50	25	0.5	8	2	0	4	2	0.666667	1686.17	0	1364.5	2329.5	409.667	371.25	486.5	142.167	173	80.5	397.167	497.25	197	16	8	6	2	7	8	1	0	0	0	6	2	0	0	0	0	1	4	1	0	0	0
GG2	40	+ve	E3	100	0	0	0	0	8	8	0	0	0	0	0	0	0	0	0	0	0	0	0	0	0	0	0	0	0	0	0	0	0	0	0	0	0	0	0	0	0	0	0	0	0	0	0	0	0
WT	10		Mean	47.5	1.25	28.75	22.5	0.2875	8	3.8	0.1	2.3	1.8	0.502857	1488.83	206.9	1119.69	683.833	509.83	344.169	254.317	426.428	379.288	197.367	450.635	500.285	117.967	17.5	7.1	6.4	4	7.6	5.9	1.6	0.1	1.5	0.8	4.2	1.8	0.4	0.1	0.5	0.1	2.4	2.3	0.8	0	0.3	0.6
Grb10	13		Mean	30.7692	3.84615	58.6538	6.73077	0.586538	8	2.46154	0.307692	4.69231	0.538462	0.817308	991.645	336.577	950.933	582	249.298	216.024	225.115	632.272	641.878	62.7308	649.991	699.398	102.846	21.0769	7.76923	10.6154	2.69231	7.84615	6.53846	5	0	0	1.69231	5.53846	1.30769	0.461538	0	0	0.461538	1	4.69231	4.38462	0	0	0.538462
			SE	11.9024	1.25	10.5492	7.63763	0.105492	0	0.95219	0.1	0.843933	0.61101	0.136971	360.621	206.9	414.606	219.949	163.732	154.446	126.377	181.699	190.009	128.373	147.298	168.027	51.3178	3.55668	1.66966	1.668	1.07497	1.32665	1.30341	0.718022	0.1	1.5	0.489898	0.95219	0.442217	0.305505	0.1	0.5	0.1	0.945163	0.843933	0.416333	0	0.3	0.305505
			SE	8.68051	2.18561	8.65385	2.69116	0.0865385	0	0.694441	0.174848	0.692308	0.215293	0.0813791	182.232	177.899	196.654	250.087	68.0834	61.8358	102.616	373.189	372.599	25.515	125.456	134.264	40.3203	3.23733	0.975034	2.14697	1.2929	1.04296	0.951486	2.11224	0	0	1.21626	0.694441	0.414243	0.268313	0	0	0.461538	0.339683	0.692308	1.87951	0	0	0.402164
Forced - B1		F1		DNS	Omits	Left	Right	Inco	Trials	DNS	Omits	Left	Right	Inco
GB0	40	WT	E3	0	0	50	50	0.5	4	0	0	2	2	0	152.75	0	143	162.5	110.25	132.5	88	2170.75	1075.5	3266	40.5	4	77	46	19	15	12	5	7	2	0	24	8	4	3	0	0	9	3	1	2	1	0	9	2
GB1	48	WT	E3	0	0	50	0	0.5	4	0	0	2	0	2	704.25	0	456.5	0	624	624	0	77.5	77.5	0	1824.5	1824.5	0	15	9	6	0	5	7	2	0	0	1	4	3	2	0	0	0	1	4	0	0	0	1
GF0	48	WT	E3	0	0	25	50	0.25	4	0	0	1	2	1	357.25	0	597	313.5	98.6667	154	71	88.6667	78	94	294	173	354.5	29	9	11	9	11	6	0	0	0	12	4	2	0	0	0	3	5	1	0	0	0	5
GF1	48	WT	E3	0	0	50	50	0.5	4	0	0	2	2	0	231.25	0	297	165.5	223.75	164	283.5	57	59.5	54.5	981	1299	663	21	11	6	4	4	6	0	0	0	11	4	2	0	0	0	5	0	2	0	0	0	4
GC0	48	+ve	E3	50	0	25	0	0.25	4	2	0	1	0	1	465	0	633	0	128	128	0	99	99	0	2002	2002	0	28	10	12	6	9	2	0	0	0	17	2	0	0	0	0	8	3	2	0	0	0	7
GC1	48	WT	E3	0	25	25	0	0.25	4	0	1	1	0	2	1038.75	3411	234	0	279	279	0	1062	1062	0	65	65	0	27	10	8	9	7	7	1	0	0	12	4	4	0	0	0	2	0	2	1	0	0	5
GC2	48	+ve	E3	0	0	50	25	0.5	4	0	0	2	1	1	268	0	372.5	153	143	34.5	360	135.333	161.5	83	612	753	330	13	5	3	5	4	4	2	0	0	3	4	0	1	0	0	0	0	3	0	0	0	0
GC3	40	+ve	E3	0	25	50	0	0.5	4	0	1	2	0	1	134.25	63	132	0	39.5	39.5	0	81.5	81.5	0	1395	1395	0	19	10	9	0	4	8	4	1	0	2	4	5	0	0	0	1	0	3	4	1	0	1
GE0	40	+ve	E3	0	0	50	25	0.5	4	0	0	2	1	1	157.25	0	114	91	152	69.5	317	300	383	134	126	70	238	16	9	6	1	4	6	2	0	2	2	4	2	1	0	2	0	0	3	1	0	0	2
GE1	40	+ve	E3	0	0	50	50	0.5	4	0	0	2	2	0	138.25	0	105.5	171	97.25	95.5	99	1159	2264.5	53.5	529.25	632	426.5	12	6	3	3	4	5	2	0	1	0	4	1	0	0	1	0	0	2	1	0	0	0
GE2	48	WT	E3	0	0	50	0	0.5	4	0	0	2	0	2	582	0	400	0	27.5	27.5	0	1675	1675	0	30	30	0	24	10	7	7	9	4	0	0	2	9	4	0	0	0	1	5	2	4	0	0	0	1
GE3	40	+ve	E3	0	0	50	0	0.5	4	0	0	2	0	2	118	0	146	0	140.5	140.5	0	51.5	51.5	0	1154.5	1154.5	0	13	6	7	0	4	6	2	0	0	1	4	2	0	0	0	0	0	4	2	0	0	1
GK1	48	WT	E3	0	0	50	50	0.5	4	0	0	2	2	0	302.5	0	123.5	481.5	544.25	263.5	825	56.5	51.5	61.5	945.25	1168	722.5	23	12	4	7	6	8	3	0	0	6	4	4	0	0	0	4	0	2	0	0	0	2
GK3	48	+ve	E3	0	0	50	25	0.5	4	0	0	2	1	1	118.25	0	144	163	106.333	67.5	184	63.3333	52.5	85	541.667	680.5	264	18	8	7	3	4	6	0	0	0	8	4	2	0	0	0	2	0	3	0	0	0	4
GK4	40	+ve	E3	25	0	25	0	0.25	4	1	0	1	0	2	485.333	0	230	0	105	105	0	121	121	0	1278	1278	0	31	8	23	0	7	7	4	1	0	12	3	4	0	0	0	1	4	3	4	1	0	11
GA0	48	WT	E3	0	0	25	0	0.25	4	0	0	1	0	3	270.5	0	370	0	41	41	0	83	83	0	82	82	0	25	10	12	3	6	5	0	0	1	13	4	1	0	0	0	5	2	3	0	0	1	6
GA1	40	WT	E3	0	0	50	25	0.5	4	0	0	2	1	1	69.5	0	62	118	165.667	169.5	158	40	39.5	41	801.333	1050	304	27	15	10	2	5	9	0	0	0	13	4	5	0	0	0	6	0	3	0	0	0	7
GA2	40	+ve	E3	0	0	50	50	0.5	4	0	0	2	2	0	298.75	0	364.5	233	275	45.5	504.5	396.25	482	310.5	44.25	47.5	41	14	6	2	6	4	4	1	0	0	5	4	0	0	0	0	2	0	2	0	0	0	0
GJ1	48	+ve	E3	0	0	50	50	0.5	4	0	0	2	2	0	124.75	0	133.5	116	664.5	1266.5	62.5	26.25	40.5	12	645.25	886	404.5	13	6	3	4	5	4	1	0	0	3	4	0	0	0	0	2	1	2	0	0	0	0
GJ2	48	+ve	E3	0	0	50	25	0.5	4	0	0	2	1	1	1178	0	1974.5	604	425	68.5	1138	122.333	125	117	955.333	1231	404	15	5	8	2	5	5	2	0	0	3	4	1	0	0	0	0	1	3	2	0	0	2
GJ3	48	WT	E3	0	0	50	0	0.5	4	0	0	2	0	2	164.25	0	182	0	35.5	35.5	0	740	740	0	55	55	0	16	5	7	4	4	4	0	0	0	8	4	0	0	0	0	1	0	4	0	0	0	3
GG1	48	+ve	E3	0	0	50	0	0.5	4	0	0	2	0	2	239.25	0	95	0	72.5	72.5	0	49	49	0	678.5	678.5	0	20	7	11	2	6	5	1	0	0	8	4	1	0	0	0	2	1	4	1	0	0	5
GG2	40	+ve	E3	25	0	50	0	0.5	4	1	0	2	0	1	109	0	105	0	262	262	0	84.5	84.5	0	937	937	0	27	12	15	0	3	6	0	1	0	17	3	3	0	0	0	6	0	3	0	1	0	11
WT	10		Mean	0	2.5	42.5	22.5	0.425	4	0	0.1	1.7	0.9	1.3	387.3	341.1	286.5	124.1	214.958	189.05	142.55	605.042	494.15	351.7	511.858	575.05	212.1	25.3	11	8.6	5.7	6.2	6.3	0.8	0	2.7	9.3	4	2.4	0.2	0	1	3.4	1.1	2.7	0.2	0	1	3.6
Grb10	13		Mean	7.69231	1.92308	46.1538	19.2308	0.461538	4	0.307692	0.0769231	1.84615	0.769231	1	294.929	4.84615	349.962	117.769	200.814	184.231	205	206.846	307.346	61.1538	838.365	903.462	162.154	18.3846	7.53846	8.38462	2.46154	4.84615	5.23077	1.61538	0.230769	0.230769	6.23077	3.69231	1.61538	0.153846	0	0.230769	1.84615	0.769231	2.84615	1.15385	0.230769	0	3.38462
			SE	0	2.5	3.81881	7.86165	0.0381881	0	0	0.1	0.152753	0.314466	0.334996	95.1375	341.1	53.3867	52.0509	67.0366	55.762	81.3457	248.58	189.228	323.987	191.768	216.562	90.4143	2.7205	1.19257	1.0562	1.17426	0.711805	0.517472	0.359011	0	2.37604	1.19304	0	0.541603	0.2	0	0.894427	0.618241	0.504425	0.334996	0.133333	0	0.894427	0.669992
			SE	4.37121	1.92308	2.60386	5.76923	0.0260386	0	0.174848	0.0769231	0.104154	0.230769	0.196116	81.8145	4.84615	142.171	46.6682	48.0715	91.7025	90.6137	84.5556	167.339	24.879	147.984	147.291	50.8794	1.77785	0.605693	1.63118	0.626502	0.450728	0.425981	0.367571	0.121626	0.166173	1.61386	0.174848	0.446331	0.104154	0	0.166173	0.687304	0.360801	0.191021	0.405825	0.121626	0	1.11251
Forced - B2		F2		DNS	Omits	Left	Right	Inco	Trials	DNS	Omits	Left	Right	Inco
GB0	40	WT	E3	0	0	50	0	0.5	4	0	0	2	0	2	103.5	0	181	0	205	205	0	1396.5	1396.5	0	29.5	29.5	0	12	6	6	0	4	4	0	0	3	1	4	0	0	0	1	1	0	4	0	0	2	0
GB1	48	WT	E3	50	50	0	0	0	4	2	2	0	0	0	2107.5	2107.5	0	0	0	0	0	0	0	0	0	0	0	8	7	1	0	2	1	0	0	0	5	2	1	0	0	0	4	0	0	0	0	0	1
GF0	48	WT	E3	50	0	25	25	0.25	4	2	0	1	1	0	1905.5	0	3245	566	561.5	907	216	450.5	806	95	251.5	216	287	21	4	10	7	4	2	5	0	0	10	2	0	1	0	0	1	1	1	3	0	0	5
GF1	48	WT	E3	0	0	50	50	0.5	4	0	0	2	2	0	144.75	0	181.5	108	254.25	312	196.5	66.25	79.5	53	843.5	1114.5	572.5	21	9	6	6	5	8	2	0	0	6	4	4	0	0	0	1	0	2	1	0	0	3
GC0	48	+ve	E3	0	0	50	50	0.5	4	0	0	2	2	0	518.75	0	308	729.5	521.25	668	374.5	105.25	74	136.5	1445.75	1979.5	912	24	12	8	4	4	7	6	0	0	7	4	3	2	0	0	3	0	2	3	0	0	3
GC1	48	WT	E3	0	0	50	50	0.5	4	0	0	2	2	0	1104	0	595	1613	311	123.5	498.5	613.5	957.5	269.5	73	62.5	83.5	14	5	4	5	4	5	5	0	0	0	4	1	0	0	0	0	0	2	2	0	0	0
GC2	48	+ve	E3	0	0	50	0	0.5	4	0	0	2	0	2	173.25	0	147.5	0	99.5	99.5	0	373	373	0	356	356	0	9	4	5	0	4	4	1	0	0	0	4	0	0	0	0	0	0	4	1	0	0	0
GC3	40	+ve	E3	0	0	50	0	0.5	4	0	0	2	0	2	156.5	0	245	0	56	56	0	83	83	0	1312.5	1312.5	0	16	5	11	0	4	5	4	0	0	3	4	1	0	0	0	0	0	4	4	0	0	3
GE0	40	+ve	E3	0	0	50	0	0.5	4	0	0	2	0	2	175.75	0	228.5	0	42	42	0	164.5	164.5	0	279	279	0	10	4	6	0	6	4	0	0	0	0	4	0	0	0	0	0	2	4	0	0	0	0
GE1	40	+ve	E3	0	0	50	25	0.5	4	0	0	2	1	1	95	0	110	54	104.333	75	163	111.667	137.5	60	892	1153.5	369	12	5	5	2	5	4	3	0	0	0	4	0	1	0	0	0	1	3	1	0	0	0
GE2	48	WT	E3	0	0	25	50	0.25	4	0	0	1	2	1	634.25	0	527	836.5	262.333	281	253	3785.33	2839	4258.5	34.6667	47	28.5	16	6	2	8	9	4	0	0	2	1	4	0	0	0	1	1	1	1	0	0	0	0
GE3	40	+ve	E3	0	0	50	0	0.5	4	0	0	2	0	2	109.5	0	102.5	0	81	81	0	86.5	86.5	0	961.5	961.5	0	9	4	5	0	4	4	1	0	0	0	4	0	0	0	0	0	0	4	1	0	0	0
GK1	48	WT	E3	0	0	50	25	0.5	4	0	0	2	1	1	769	0	516	1516	756.333	583	1103	56.6667	57	56	1017.67	1266	521	17	10	5	2	6	10	1	0	0	0	4	6	0	0	0	0	1	3	1	0	0	0
GK3	48	+ve	E3	0	0	50	50	0.5	4	0	0	2	2	0	360.75	0	604	117.5	301	56	546	165.75	229	102.5	517.5	703	332	10	5	3	2	4	4	0	0	0	2	4	0	0	0	0	1	0	2	0	0	0	1
GK4	40	+ve	E3	0	0	50	0	0.5	4	0	0	2	0	2	369.75	0	574	0	113	113	0	111	111	0	958	958	0	57	24	33	0	6	15	17	0	0	19	4	11	5	0	0	4	2	4	12	0	0	15
GA0	48	WT	E3	0	0	50	25	0.5	4	0	0	2	1	1	231	0	294.5	34	297.333	162.5	567	62.3333	60	67	520	648	264	16	6	7	3	5	5	1	0	0	5	4	1	0	0	0	1	1	3	0	0	0	3
GA1	40	WT	E3	0	0	50	25	0.5	4	0	0	2	1	1	182.75	0	259.5	48	650	877	196	99.6667	102	95	808.667	1056	314	12	7	3	2	4	6	0	0	0	2	4	2	0	0	0	1	0	3	0	0	0	0
GA2	40	+ve	E3	0	0	50	50	0.5	4	0	0	2	2	0	228.5	0	369	88	297.75	71	524.5	766.75	1188.5	345	31	37	25	14	8	4	2	5	5	0	0	0	4	4	1	0	0	0	3	1	2	0	0	0	1
GJ1	48	+ve	E3	0	0	25	50	0.25	4	0	0	1	2	1	205.25	0	206	218.5	78.3333	111	62	52.6667	126	16	493	732	373.5	12	4	5	3	7	4	1	0	0	0	4	0	0	0	0	0	3	1	1	0	0	0
GJ2	48	+ve	E3	0	0	25	25	0.25	4	0	0	1	1	2	628.5	0	110	1828	173	43	303	128	124	132	626	954	298	30	8	16	6	10	4	4	0	0	12	4	0	2	0	0	2	5	2	2	0	0	7
GJ3	48	WT	E3	75	25	0	0	0	4	3	1	0	0	0	959	959	0	0	0	0	0	0	0	0	0	0	0	3	2	1	0	2	1	0	0	0	0	1	1	0	0	0	0	1	0	0	0	0	0
GG1	48	+ve	E3	0	0	50	50	0.5	4	0	0	2	2	0	321.75	0	307.5	336	267.25	229	305.5	70	83.5	56.5	365	518	212	15	8	5	2	4	6	3	0	0	2	4	2	1	0	0	1	0	2	2	0	0	1
GG2	40	+ve	E3	0	0	50	0	0.5	4	0	0	2	0	2	347.5	0	182.5	0	112	112	0	116.5	116.5	0	850.5	850.5	0	14	6	8	0	6	5	3	0	0	0	4	1	1	0	0	0	2	4	2	0	0	0
WT	10		Mean	17.5	7.5	35	25	0.35	4	0.7	0.3	1.4	1	0.6	814.125	306.65	579.95	472.15	329.775	345.1	303	653.075	629.75	489.4	357.85	443.95	207.05	14	6.2	4.5	3.3	4.5	4.6	1.4	0	0.5	3	3.3	1.6	0.1	0	0.2	1	0.5	1.9	0.7	0	0.2	1.2
Grb10	13		Mean	0	0	46.1538	23.0769	0.461538	4	0	0	1.84615	0.923077	1.23077	283.904	0	268.808	259.346	172.801	135.115	175.269	179.583	222.846	65.2692	699.058	830.346	193.962	17.8462	7.46154	8.76923	1.61538	5.30769	5.46154	3.30769	0	0	3.76923	4	1.46154	0.923077	0	0	1.07692	1.23077	2.92308	2.23077	0	0	2.38462
			SE	9.16667	5.33594	6.66667	6.45497	0.0666667	0	0.366667	0.213437	0.266667	0.258199	0.221108	228.401	221.633	303.395	202.923	80.4792	105.447	108.331	374.383	291.248	419.534	127.435	165.416	69.0367	1.76383	0.727247	0.909823	0.955103	0.636832	0.921352	0.635959	0	0.341565	1.06458	0.366667	0.618241	0.1	0	0.133333	0.365148	0.166667	0.433333	0.334996	0	0.2	0.573488
			SE	0	0	2.60386	6.61531	0.0260386	0	0	0	0.104154	0.264612	0.25705	44.4469	0	45.6412	142.875	38.2151	46.4082	58.2693	53.7196	83.5298	27.4159	114.99	138.409	74.3748	3.67571	1.52591	2.23651	0.525485	0.48549	0.836778	1.25261	0	0	1.60589	0	0.836778	0.399704	0	0	0.399704	0.425981	0.309291	0.878182	0	0	1.19045
Forced - B3		F3		DNS	Omits	Left	Right	Inco	Trials	DNS	Omits	Left	Right	Inco
GB0	40	WT	E3	0	0	50	50	0.5	4	0	0	2	2	0	113.25	0	110.5	116	171.25	162.5	180	650.5	950.5	350.5	38.75	48	29.5	15	6	5	4	6	5	2	0	0	2	4	1	0	0	0	1	2	2	0	0	0	1
GB1	48	WT	E3	100	0	0	0	0	4	4	0	0	0	0	0	0	0	0	0	0	0	0	0	0	0	0	0	0	0	0	0	0	0	0	0	0	0	0	0	0	0	0	0	0	0	0	0	0	0
GF0	48	WT	E3	50	25	0	25	0	4	2	1	0	1	0	2076.5	3756	0	397	378	0	378	90	0	90	239	0	239	5	2	1	2	3	1	1	0	0	0	2	0	0	0	0	0	1	0	0	0	0	0
GF1	48	WT	E3	50	0	0	25	0	4	2	0	0	1	1	345.5	0	0	125	292	0	292	74	0	74	564	0	564	19	14	1	4	2	4	0	0	0	13	2	2	0	0	0	10	0	0	0	0	0	1
GC0	48	+ve	E3	0	0	50	25	0.5	4	0	0	2	1	1	1280.75	0	974	739	550	525	600	93.6667	78.5	124	907.333	1140.5	441	19	7	8	4	11	5	3	0	0	0	4	1	2	0	0	0	4	3	1	0	0	0
GC1	48	WT	E3	75	25	0	0	0	4	3	1	0	0	0	2326	2326	0	0	0	0	0	0	0	0	0	0	0	1	1	0	0	1	0	0	0	0	0	1	0	0	0	0	0	0	0	0	0	0	0
GC2	48	+ve	E3	0	0	50	0	0.5	4	0	0	2	0	2	796.75	0	687	0	54.5	54.5	0	137.5	137.5	0	720	720	0	11	5	6	0	4	5	2	0	0	0	4	1	0	0	0	0	0	4	2	0	0	0
GC3	40	+ve	E3	0	50	50	0	0.5	4	0	2	2	0	0	1037	1897	177	0	47.5	47.5	0	79	79	0	1509.5	1509.5	0	11	4	7	0	4	2	5	0	0	0	4	0	0	0	0	0	0	2	5	0	0	0
GE0	40	+ve	E3	0	0	50	25	0.5	4	0	0	2	1	1	331	0	468.5	239	321.333	43.5	877	154.667	140	184	122.333	39	289	8	4	3	1	4	4	0	0	0	0	4	0	0	0	0	0	0	3	0	0	0	0
GE1	40	+ve	E3	0	0	50	50	0.5	4	0	0	2	2	0	682.5	0	240	1125	425.5	114	737	116.25	121.5	111	723.75	1127.5	320	9	4	3	2	4	4	1	0	0	0	4	0	0	0	0	0	0	2	1	0	0	0
GE2	48	WT	E3	0	0	50	25	0.5	4	0	0	2	1	1	230.5	0	96.5	165	143.333	35	360	498.333	716.5	62	56.6667	35	100	16	6	6	4	7	6	1	0	0	2	4	2	0	0	0	0	2	3	1	0	0	0
GE3	40	+ve	E3	0	0	50	25	0.5	4	0	0	2	1	1	222.75	0	233	78	210.667	166	300	94.6667	98.5	87	593.333	719	342	11	5	5	1	6	5	0	0	0	0	4	1	0	0	0	0	2	3	0	0	0	0
GK1	48	WT	E3	75	25	0	0	0	4	3	1	0	0	0	1351	1351	0	0	0	0	0	0	0	0	0	0	0	14	1	6	7	14	0	0	0	0	0	1	0	0	0	0	0	6	0	0	0	0	0
GK3	48	+ve	E3	0	0	50	25	0.5	4	0	0	2	1	1	408	0	343	607	443.333	85.5	1159	216.667	266	118	481	605.5	232	9	5	3	1	4	5	0	0	0	0	4	1	0	0	0	0	0	3	0	0	0	0
GK4	40	+ve	E3	0	25	50	0	0.5	4	0	1	2	0	1	619	450	505.5	0	56	56	0	98.5	98.5	0	954.5	954.5	0	37	8	29	0	4	4	17	0	0	12	4	1	3	0	0	0	0	3	14	0	0	12
GA0	48	WT	E3	0	0	50	25	0.5	4	0	0	2	1	1	959.25	0	461.5	1571	164.333	123	247	482.667	684	80	305.667	352	213	14	9	4	1	4	9	0	0	0	1	4	5	0	0	0	0	0	3	0	0	0	1
GA1	40	WT	E3	0	0	50	50	0.5	4	0	0	2	2	0	550	0	270	830	337	279.5	394.5	77.75	83.5	72	658	1047	269	12	5	5	2	6	5	1	0	0	0	4	1	0	0	0	0	2	2	1	0	0	0
GA2	40	+ve	E3	0	0	50	50	0.5	4	0	0	2	2	0	297	0	311	283	86	79.5	92.5	896.25	1182.5	610	29.25	29.5	29	13	5	5	3	5	5	2	0	0	1	4	1	0	0	0	0	0	2	2	0	0	1
GJ1	48	+ve	E3	100	0	0	0	0	4	4	0	0	0	0	0	0	0	0	0	0	0	0	0	0	0	0	0	0	0	0	0	0	0	0	0	0	0	0	0	0	0	0	0	0	0	0	0	0	0
GJ2	48	+ve	E3	0	0	50	50	0.5	4	0	0	2	2	0	604.5	0	438.5	770.5	521	295	747	142.25	156	128.5	723.5	1041	406	18	6	5	7	5	4	7	0	0	2	4	0	2	0	0	0	1	2	2	0	0	0
GJ3	48	WT	E3	75	25	0	0	0	4	3	1	0	0	0	478	478	0	0	0	0	0	0	0	0	0	0	0	4	2	1	1	1	1	0	0	0	2	1	1	0	0	0	0	0	0	0	0	0	1
GG1	48	+ve	E3	0	0	50	25	0.5	4	0	0	2	1	1	446.5	0	440.5	754	320	343.5	273	170.333	221.5	68	435.333	558	190	14	6	7	1	4	6	2	0	0	2	4	2	0	0	0	0	0	3	2	0	0	2
GG2	40	+ve	E3	75	25	0	0	0	4	3	1	0	0	0	2952	2952	0	0	0	0	0	0	0	0	0	0	0	2	2	0	0	1	1	0	0	0	0	1	1	0	0	0	0	0	0	0	0	0	0
WT	10		Mean	42.5	10	20	20	0.2	4	1.7	0.4	0.8	0.8	0.3	843	791.1	93.85	320.4	148.592	60	185.15	187.325	243.45	72.85	186.208	148.2	141.45	10	4.6	2.9	2.5	4.4	3.1	0.5	0	0	2	2.3	1.2	0	0	0	1.1	1.3	1	0.2	0	0	0.4
Grb10	13		Mean	13.4615	7.69231	42.3077	21.1538	0.423077	4	0.538462	0.307692	1.69231	0.846154	0.615385	744.442	407.615	370.615	353.5	233.526	139.231	368.115	169.212	198.423	110.038	553.833	649.538	173	12.4615	4.69231	6.23077	1.53846	4.30769	3.84615	3	0	0	1.30769	3.46154	0.692308	0.538462	0	0	0	0.538462	2.30769	2.23077	0	0	1.15385
			SE	12.3884	4.08248	8.16497	6.2361	0.0816497	0	0.495536	0.163299	0.326599	0.249444	0.152753	259.857	412.487	49.3656	161.393	46.8803	30.7102	54.1584	79.8031	120.138	33.1299	78.8522	105.62	58.0934	2.16025	1.38404	0.795124	0.703167	1.30979	0.99387	0.223607	0	0	1.2561	0.495536	0.489898	0	0	0	0.99387	0.597216	0.421637	0.133333	0	0	0.163299
			SE	9.22275	4.37121	5.20772	5.55144	0.0520772	0	0.36891	0.174848	0.208309	0.222058	0.180401	207.053	257.645	73.9869	109.227	57.0866	43.3436	112.804	62.9028	84.5692	45.2112	123.512	140.429	48.2973	2.52326	0.570477	2.01963	0.573064	0.710585	0.491546	1.31071	0	0	0.915568	0.36891	0.174848	0.291226	0	0	0	0.332346	0.327864	1.05705	0	0	0.918793
Choice Total		CT		DNS	Omits	Left	Right	All Bias
GB0	40	WT	E3	0	0	95.8333	4.16667	0.958333	24	0	0	23	1	0.958333	305.708	0	310.217	202	130.75	134.696	40	1412	1459.87	311	54.7917	55.1304	47	99	49	37	13	26	33	7	0	21	12	24	9	1	0	7	8	1	23	6	0	5	2
GB1	48	WT	E3	66.6667	0	29.1667	4.16667	0.291667	24	16	0	7	1	0.875	1358.88	0	1508.86	309	762.5	816.286	386	69.75	70.2857	66	1450	1585.57	501	23	11	9	3	12	11	0	0	0	0	8	3	0	0	0	0	2	7	0	0	0	0
GF0	48	WT	E3	54.1667	0	8.33333	37.5	0.0833333	24	13	0	2	9	0.181818	777.727	0	691.5	796.889	138	91.5	148.333	231.909	758.5	114.889	222.364	242	218	62	19	20	23	24	13	8	1	0	16	11	2	0	0	0	6	8	2	4	1	0	5
GF1	48	WT	E3	12.5	0	62.5	25	0.625	24	3	0	15	6	0.714286	408.238	0	388.067	458.667	237.571	202.267	325.833	92.0952	99.8	72.8333	919.143	1085.87	502.333	99	44	40	15	30	28	15	0	0	26	21	7	5	0	0	11	8	15	6	0	0	11
GC0	48	+ve	E3	29.1667	4.16667	41.6667	25	0.416667	24	7	1	10	6	0.625	736.471	83	832	686.167	523.812	350.4	812.833	112.625	105.1	125.167	1039.25	1328.3	557.5	140	44	50	46	39	25	9	1	0	66	17	9	1	1	0	16	4	10	7	0	0	29
GC1	48	WT	E3	16.6667	12.5	54.1667	16.6667	0.541667	24	4	3	13	4	0.764706	1133.85	1733.67	911	1408.25	448.529	264.308	1047.25	6161.29	7742.46	1022.5	38.1176	45	15.75	59	30	22	7	23	22	9	0	1	4	20	5	1	0	0	4	3	13	6	0	0	0
GC2	48	+ve	E3	0	0	91.6667	8.33333	0.916667	24	0	0	22	2	0.916667	399.042	0	332.545	1130.5	77.0417	50.9545	364	341.5	355.318	189.5	544.208	573.227	225	63	31	27	5	26	27	2	0	0	8	24	3	0	0	0	4	1	22	2	0	0	2
GC3	40	+ve	E3	4.16667	4.16667	91.6667	0	0.916667	24	1	1	22	0	1	523.13	1570	475.545	0	74.5	74.5	0	74.5909	74.5909	0	1555.95	1555.95	0	91	28	63	0	24	24	39	1	0	3	23	2	0	0	0	3	1	22	39	1	0	0
GE0	40	+ve	E3	0	0	83.3333	16.6667	0.833333	24	0	0	20	4	0.833333	203.958	0	194.75	250	67.0833	70.7	49	118.958	116.75	130	264.625	263.45	270.5	72	30	38	4	26	26	14	0	0	6	24	2	3	0	0	1	2	20	11	0	0	5
GE1	40	+ve	E3	8.33333	0	83.3333	8.33333	0.833333	24	2	0	20	2	0.909091	676.318	0	680.5	634.5	212.591	171.85	620	739.364	802	113	724.136	769.9	266.5	60	25	32	3	24	24	6	0	0	6	22	2	0	0	0	1	1	20	6	0	0	5
GE2	48	WT	E3	4.16667	0	62.5	33.3333	0.625	24	1	0	15	8	0.652174	714.043	0	481.533	1150	89.9565	56.2667	153.125	471.739	612.533	207.75	40.7826	41.1333	40.125	112	38	45	29	43	25	12	0	0	32	23	2	3	0	0	10	9	15	7	0	0	14
GE3	40	+ve	E3	4.16667	0	83.3333	12.5	0.833333	24	1	0	20	3	0.869565	145.13	0	151.6	102	105.478	106.5	98.6667	366.696	357.45	428.333	747.391	834.2	168.667	60	25	32	3	30	25	2	0	1	2	23	2	0	0	0	0	7	20	2	0	1	2
GK1	48	WT	E3	37.5	4.16667	41.6667	16.6667	0.416667	24	9	1	10	4	0.714286	1317.4	948	1054.6	2066.75	571.071	592.7	517	105.571	117.6	75.5	1097.57	1255.8	702	78	28	36	14	38	25	10	0	0	5	15	11	0	0	0	2	16	10	8	0	0	2
GK3	48	+ve	E3	20.8333	4.16667	70.8333	4.16667	0.708333	24	5	1	17	1	0.944444	597.895	1334	488.471	1722	133.167	111.765	497	111.5	112.765	90	587.833	606.059	278	54	22	28	4	24	19	0	0	0	11	19	1	0	0	0	2	4	17	0	0	0	7
GK4	40	+ve	E3	4.16667	0	95.8333	0	0.958333	24	1	0	23	0	1	584.043	0	584.043	0	107.391	107.391	0	119.826	119.826	0	1092.43	1092.43	0	208	72	136	0	32	49	96	4	0	27	23	26	13	0	0	10	9	23	83	4	0	17
GA0	48	WT	E3	4.16667	0	75	20.8333	0.75	24	1	0	18	5	0.782609	595	0	689.056	256.4	132.348	146.722	80.6	105.087	111.111	83.4	365.87	391.722	272.8	75	35	31	9	31	31	1	0	3	9	23	8	0	0	0	4	8	18	0	0	0	5
GA1	40	WT	E3	4.16667	0	75	20.8333	0.75	24	1	0	18	5	0.782609	553.87	0	600.667	385.4	202	225.444	117.6	83.2609	89.2778	61.6	907.609	1076.22	300.6	76	35	34	7	26	28	3	1	0	18	23	5	1	1	0	5	2	18	2	0	0	12
GA2	40	+ve	E3	4.16667	0	95.8333	0	0.958333	24	1	0	23	0	1	453.304	0	453.304	0	82.3478	82.3478	0	794.435	794.435	0	38.8261	38.8261	0	56	29	27	0	23	27	2	0	0	4	23	4	0	0	0	2	0	23	2	0	0	2
GJ1	48	+ve	E3	16.6667	12.5	45.8333	25	0.458333	24	4	3	11	6	0.647059	922	1731.33	765.455	804.333	232.941	313	86.1667	1074.29	1500.64	292.667	527.765	661.273	283	70	30	24	16	25	23	9	0	1	12	20	6	1	0	0	3	2	11	7	0	1	3
GJ2	48	+ve	E3	25	0	70.8333	4.16667	0.708333	24	6	0	17	1	0.944444	1210.89	0	1131	2569	273.556	285.824	65	127.444	128.765	105	991.944	999.941	856	103	30	62	11	40	24	21	0	0	18	18	6	2	0	0	4	18	17	18	0	0	9
GJ3	48	WT	E3	66.6667	0	29.1667	4.16667	0.291667	24	16	0	7	1	0.875	826.375	0	651.714	2049	183.5	161.286	339	470.125	509	198	26	27.8571	13	38	12	23	3	24	10	3	0	0	1	8	2	1	0	0	1	14	7	2	0	0	0
GG1	48	+ve	E3	8.33333	0	83.3333	8.33333	0.833333	24	2	0	20	2	0.909091	764.182	0	607.65	2329.5	229.909	204.25	486.5	128.545	133.35	80.5	486.545	515.5	197	83	42	30	11	24	29	6	0	0	24	22	7	0	0	0	13	1	20	4	0	0	5
GG2	40	+ve	E3	62.5	0	37.5	0	0.375	24	15	0	9	0	1	267.222	0	267.222	0	55.3333	55.3333	0	121.889	121.889	0	1022.11	1022.11	0	31	14	17	0	9	10	3	0	0	9	9	1	0	0	0	4	0	9	3	0	0	5
WT	10		Mean	26.6667	1.66667	53.3333	18.3333	0.533333	24	6.4	0.4	12.8	4.4	0.730082	799.109	268.167	728.721	908.236	289.623	269.147	315.474	920.283	1157.04	221.347	512.225	580.63	261.261	72.1	30.1	29.7	12.3	27.7	22.6	6.8	0.2	2.5	12.3	17.6	5.4	1.2	0.1	0.7	5.1	7.1	12.8	4.1	0.1	0.5	5.1
Grb10	13		Mean	14.4231	1.92308	75	8.65385	0.75	24	3.46154	0.461538	18	2.07692	0.892207	575.66	362.949	535.699	786.769	167.319	152.678	236.859	325.513	363.298	119.551	740.233	789.321	238.628	83.9231	32.4615	43.5385	7.92308	26.6154	25.5385	16.0769	0.461538	0.153846	15.0769	20.5385	5.46154	1.53846	0.0769231	0	4.84615	3.84615	18	14.1538	0.384615	0.153846	7
			SE	8.56619	1.27294	8.3287	3.73712	0.083287	0	2.05589	0.305505	1.99889	0.896908	0.0673284	115.493	188.124	111.834	229.07	71.6906	76.8859	94.648	596.526	744.969	92.7335	168.064	190.807	76.7472	8.78439	4.05641	3.46426	2.67519	2.70411	2.65497	1.56205	0.133333	2.07766	3.38969	2.05589	1.02415	0.512076	0.1	0.7	1.16857	1.62925	1.99889	0.924362	0.1	0.5	1.69607
			SE	4.80235	1.01355	5.72005	2.47232	0.0572005	0	1.15256	0.243252	1.37281	0.593356	0.0347684	82.553	188.386	76.511	250.843	36.1445	28.7575	78.2723	91.719	117.969	34.9149	110.689	115.539	68.0651	12.7473	3.92333	8.64738	3.46496	2.15888	2.35507	7.28052	0.312463	0.104154	4.76427	1.15256	1.84882	0.991085	0.0769231	0	1.37676	1.39985	1.37281	6.41597	0.310881	0.104154	2.18386
Forced Total		FT		DNS	Omits	Left	Right	Inco	Trials	DNS	Omits	Left	Right	Inco
GB0	40	WT	E3	0	0	50	33.3333	0.5	12	0	0	6	4	2	123.167	0	144.833	139.25	153.6	166.667	134	1407.8	1140.83	1808.25	37.6	27.1667	53.25	73	31	26	16	15	16	4	0	27	11	12	4	0	0	10	5	3	8	1	0	11	3
GB1	48	WT	E3	50	16.6667	16.6667	0	0.166667	12	6	2	2	0	2	1172	2107.5	456.5	0	624	624	0	77.5	77.5	0	1824.5	1824.5	0	23	16	7	0	7	8	2	0	0	6	6	4	2	0	0	4	1	4	0	0	0	2
GF0	48	WT	E3	33.3333	8.33333	16.6667	33.3333	0.166667	12	4	1	2	4	1	1174.12	3756	1921	397.5	299.5	530.5	184	209.5	442	93.25	270.667	194.5	308.75	55	15	22	18	18	9	6	0	0	22	8	2	1	0	0	4	7	2	3	0	0	10
GF1	48	WT	E3	16.6667	0	33.3333	41.6667	0.333333	12	2	0	4	5	1	219.5	0	239.25	134.4	244.889	238	250.4	63	69.5	57.8	873.556	1206.75	607	61	34	13	14	11	18	2	0	0	30	10	8	0	0	0	16	0	4	1	0	0	8
GC0	48	+ve	E3	16.6667	0	41.6667	25	0.416667	12	2	0	5	3	2	812.8	0	639.4	732.667	482.875	502.8	449.667	100.125	80.8	132.333	1313.38	1648.4	755	71	29	28	14	24	14	9	0	0	24	10	4	4	0	0	11	7	7	4	0	0	10
GC1	48	WT	E3	25	16.6667	25	16.6667	0.25	12	3	2	3	2	2	1210.78	2868.5	474.667	1613	304.6	175.333	498.5	703.2	992.333	269.5	71.4	63.3333	83.5	42	16	12	14	12	12	6	0	0	12	9	5	0	0	0	2	0	4	3	0	0	5
GC2	48	+ve	E3	0	0	50	8.33333	0.5	12	0	0	6	1	5	412.667	0	402.333	153	105.286	62.8333	360	203.857	224	83	569.714	609.667	330	33	14	14	5	12	13	5	0	0	3	12	1	1	0	0	0	0	11	3	0	0	0
GC3	40	+ve	E3	0	25	50	0	0.5	12	0	3	6	0	3	442.583	1285.67	184.667	0	47.6667	47.6667	0	81.1667	81.1667	0	1405.67	1405.67	0	46	19	27	0	12	15	13	1	0	5	12	6	0	0	0	1	0	9	13	1	0	4
GE0	40	+ve	E3	0	0	50	16.6667	0.5	12	0	0	6	2	4	221.333	0	270.333	165	188	51.6667	597	211.625	229.167	159	162.875	129.333	263.5	34	17	15	2	14	14	2	0	2	2	12	2	1	0	2	0	2	10	1	0	0	2
GE1	40	+ve	E3	0	0	50	41.6667	0.5	12	0	0	6	5	1	305.25	0	151.833	529.2	218.545	94.8333	367	494.182	841.167	77.8	698.909	971	372.4	33	15	11	7	13	13	6	0	1	0	12	1	1	0	1	0	1	7	3	0	0	0
GE2	48	WT	E3	0	0	41.6667	25	0.416667	12	0	0	5	3	4	482.25	0	304	612.667	159	81.2	288.667	2025.12	1524.4	2859.67	41.75	35.4	52.3333	56	22	15	19	25	14	1	0	4	12	12	2	0	0	2	6	5	8	1	0	0	1
GE3	40	+ve	E3	0	0	50	8.33333	0.5	12	0	0	6	1	5	150.083	0	160.5	78	153.571	129.167	300	80	78.8333	87	858.857	945	342	33	15	17	1	14	15	3	0	0	1	12	3	0	0	0	0	2	11	3	0	0	1
GK1	48	WT	E3	25	8.33333	33.3333	25	0.333333	12	3	1	4	3	1	626.333	1351	319.75	826.333	635.143	423.25	917.667	56.5714	54.25	59.6667	976.286	1217	655.333	54	23	15	16	26	18	4	0	0	6	9	10	0	0	0	4	7	5	1	0	0	2
GK3	48	+ve	E3	0	0	50	33.3333	0.5	12	0	0	6	4	2	295.667	0	363.667	251.25	285.3	69.6667	608.75	150.3	182.5	102	513.8	663	290	37	18	13	6	12	15	0	0	0	10	12	3	0	0	0	3	0	8	0	0	0	5
GK4	40	+ve	E3	8.33333	8.33333	41.6667	0	0.416667	12	1	1	5	0	5	491.909	450	477.8	0	88.6	88.6	0	108	108	0	1020.6	1020.6	0	125	40	85	0	17	26	38	1	0	43	11	16	8	0	0	5	6	10	30	1	0	38
GA0	48	WT	E3	0	0	41.6667	16.6667	0.416667	12	0	0	5	2	5	486.917	0	376.4	802.5	203.714	122.4	407	245.429	314.2	73.5	365.571	416.4	238.5	55	25	23	7	15	19	1	0	1	19	12	7	0	0	0	6	3	9	0	0	1	10
GA1	40	WT	E3	0	0	50	33.3333	0.5	12	0	0	6	4	2	267.417	0	197.167	456.5	379.5	442	285.75	73	75	70	746.2	1051	289	51	27	18	6	15	20	1	0	0	15	12	8	0	0	0	7	2	8	1	0	0	7
GA2	40	+ve	E3	0	0	50	50	0.5	12	0	0	6	6	0	274.75	0	348.167	201.333	219.583	65.3333	373.833	686.417	951	421.833	34.8333	38	31.6667	41	19	11	11	14	14	3	0	0	10	12	2	0	0	0	5	1	6	2	0	0	2
GJ1	48	+ve	E3	33.3333	0	25	33.3333	0.25	12	4	0	3	4	1	165	0	157.667	167.25	413.286	881.333	62.25	37.5714	69	14	580	834.667	389	25	10	8	7	12	8	2	0	0	3	8	0	0	0	0	2	4	3	1	0	0	0
GJ2	48	+ve	E3	0	0	41.6667	33.3333	0.416667	12	0	0	5	4	3	803.667	0	987.2	993.25	411.667	154	733.75	132.444	137.2	126.5	779.111	1099.6	378.5	63	19	29	15	20	13	13	0	0	17	12	1	4	0	0	2	7	7	6	0	0	9
GJ3	48	WT	E3	50	16.6667	16.6667	0	0.166667	12	6	2	2	0	2	349	718.5	182	0	35.5	35.5	0	740	740	0	55	55	0	23	9	9	5	7	6	0	0	0	10	6	2	0	0	0	1	1	4	0	0	0	4
GG1	48	+ve	E3	0	0	50	25	0.5	12	0	0	6	3	3	335.833	0	281	475.333	241.556	215	294.667	98.7778	118	60.3333	458.111	584.833	204.667	49	21	23	5	14	17	6	0	0	12	12	5	1	0	0	3	1	9	5	0	0	8
GG2	40	+ve	E3	33.3333	8.33333	33.3333	0	0.333333	12	4	1	4	0	3	583.625	2952	143.75	0	187	187	0	100.5	100.5	0	893.75	893.75	0	43	20	23	0	10	12	3	1	0	17	8	5	1	0	0	6	2	7	2	1	0	11
WT	10		Mean	20	6.66667	32.5	22.5	0.325	12	2.4	0.8	3.9	2.7	2.2	611.149	1080.15	461.557	498.215	303.945	283.885	296.598	560.112	543.002	529.163	526.253	609.105	228.767	49.3	21.8	16	11.5	15.1	14	2.7	0	3.2	14.3	9.6	5.2	0.3	0	1.2	5.5	2.9	5.6	1.1	0	1.2	5.2
Grb10	13		Mean	7.05128	3.20513	44.8718	21.1538	0.448718	12	0.846154	0.384615	5.38462	2.53846	2.84615	407.321	360.59	351.409	288.176	234.072	196.146	318.994	191.151	246.256	97.2154	714.585	834.117	258.21	48.6923	19.6923	23.3846	5.61538	14.4615	14.5385	7.92308	0.230769	0.230769	11.3077	11.1538	3.76923	1.61538	0	0.230769	2.92308	2.53846	8.07692	5.61538	0.230769	0	6.92308
			SE	6.35862	2.42161	4.20354	4.48764	0.0420354	0	0.763035	0.290593	0.504425	0.538516	0.416333	133.405	440.348	166.004	157.255	62.099	64.7562	85.3783	213.71	167.418	311.731	184.108	207.656	76.2194	5.02228	2.47117	1.96073	2.04532	2.06263	1.58465	0.683943	0	2.67416	2.37136	0.763035	0.916515	0.213437	0	0.997775	1.30171	0.835996	0.763035	0.34801	0	1.09341	1.06249
			SE	3.51104	2.01014	2.22058	4.68139	0.0222058	0	0.421325	0.241217	0.266469	0.561767	0.450728	60.2381	238.578	67.09	85.414	36.8647	66.306	68.3824	52.0601	81.5797	30.8666	110.324	124.084	59.8521	7.28397	2.09206	5.49655	1.43464	1.05985	1.1187	2.74904	0.121626	0.166173	3.33279	0.421325	1.13879	0.655729	0	0.166173	0.887676	0.721602	0.624926	2.22612	0.121626	0	2.81585
[truncated: 103 more columns]

## Sheet: E3-Last
Grb10 - DelRei									Last E3 session				Delays are : Adjusted=1s, non-adjusted=1s in all blocks									FE0F										The following data are responses/zone (as in parts of each trial):								Z0:Initiation Stimulus on, Z1: Choice stimuli on, Z2: in delay to reward, Z3:Reward delivery, Z4: In ITI
																	All latencines are in s				All latencines are in s				All latencines are in s
				% Responses				All		Responses				% (AD/NA)	Latency to Initiate (CP)				Latency to respond (NP)			Latency to collect			Duration of first eat (PP)			Number of NPs				All NPs						Centre NPs only						Adjusted NPs only
Subject	Session	Gtype	Task	DNS	Omits	AD	NA	Bias	Trials	DNS	Omits	AD	NA	Bias	All	Omits	AD	NA	All	AD	NA	All	AD	NA	All	AD	NA	All	Centre	AD	NA	0	1	2	3	4	5	0	1	2	3	4	5	0	1	2	3	4	5
Choice - B1		C1
GB0	44	WT	E3	0	0	100	0	1	8	0	0	8	0	1	108.125	0	108.125	0	108.125	108.125	0	1738.12	1738.12	0	41	41	0	21	10	10	1	8	9	0	0	0	4	8	1	0	0	0	1	0	8	0	0	0	2
GB1	52	WT	E3	0	0	100	0	1	8	0	0	8	0	1	475.75	0	475.75	0	608.375	608.375	0	46.125	46.125	0	1110	1110	0	18	10	8	0	8	10	0	0	0	0	8	2	0	0	0	0	0	8	0	0	0	0
GF0	52	WT	E3	0	0	37.5	62.5	0.375	8	0	0	3	5	0.375	218.625	0	129.333	272.2	91.875	66	107.4	450.125	756.333	266.4	219.25	118.667	279.6	77	18	30	29	19	11	13	1	0	33	8	3	0	0	0	7	8	3	4	0	0	15
GF1	52	WT	E3	0	0	62.5	37.5	0.625	8	0	0	5	3	0.625	465.875	0	251.8	822.667	298.25	197.4	466.333	57.375	60.8	51.6667	1328.88	1428	1163.67	30	13	10	7	12	8	1	0	0	9	8	0	0	0	0	5	2	5	1	0	0	2
GC0	52	+ve	E3	0	0	87.5	12.5	0.875	8	0	0	7	1	0.875	567.375	0	630.571	125	256.125	232.857	419	92.625	83.2857	158	1303.62	1399.29	634	55	17	25	13	19	9	1	0	0	26	8	1	0	0	0	8	4	7	1	0	0	13
GC1	52	WT	E3	0	0	87.5	12.5	0.875	8	0	0	7	1	0.875	220.25	0	240.857	76	139.25	140.286	132	711.25	764	342	93.625	101.714	37	26	12	12	2	11	10	2	0	0	3	8	2	0	0	0	2	3	7	1	0	0	1
GC2	52	+ve	E3	0	0	100	0	1	8	0	0	8	0	1	131	0	131	0	37.125	37.125	0	448.75	448.75	0	411.75	411.75	0	28	12	16	0	8	9	4	0	0	7	8	1	0	0	0	3	0	8	4	0	0	4
GC3	44	+ve	E3	0	0	100	0	1	8	0	0	8	0	1	230.125	0	230.125	0	41.625	41.625	0	59.75	59.75	0	1227.25	1227.25	0	30	11	19	0	11	10	8	0	0	1	8	2	0	0	0	1	3	8	8	0	0	0
GE0	44	+ve	E3	0	0	100	0	1	8	0	0	8	0	1	201.875	0	201.875	0	56.5	56.5	0	84.375	84.375	0	577.5	577.5	0	30	15	13	2	8	10	1	0	0	11	8	2	0	0	0	5	0	8	1	0	0	4
GE1	44	+ve	E3	0	0	100	0	1	8	0	0	8	0	1	188.75	0	188.75	0	167.25	167.25	0	32	32	0	1078.5	1078.5	0	26	13	13	0	12	9	3	0	0	2	8	1	2	0	0	2	4	8	1	0	0	0
GE2	52	WT	E3	0	0	87.5	12.5	0.875	8	0	0	7	1	0.875	189.25	0	208.286	56	70.75	75.8571	35	488.5	488.429	489	69.625	76.7143	20	57	22	17	18	16	9	0	0	8	24	8	1	0	0	3	10	3	7	0	0	1	6
GE3	44	+ve	E3	0	0	62.5	37.5	0.625	8	0	0	5	3	0.625	105.75	0	96.4	121.333	62.25	46	89.3333	995.875	1231.8	602.667	8.875	9	8.66667	22	8	11	3	12	8	0	0	0	2	8	0	0	0	0	0	4	5	0	0	0	2
GK1	52	WT	E3	0	0	75	25	0.75	8	0	0	6	2	0.75	304.25	0	297.167	325.5	207.5	133.667	429	50.875	46.6667	63.5	1068.62	1230	584.5	32	11	14	7	9	9	1	0	0	13	8	1	0	0	0	2	1	6	0	0	0	7
GK3	52	+ve	E3	0	0	100	0	1	8	0	0	8	0	1	252.75	0	252.75	0	163.125	163.125	0	66.25	66.25	0	695.375	695.375	0	23	10	12	1	10	9	0	0	0	4	8	1	0	0	0	1	2	8	0	0	0	2
GK4	44	+ve	E3	0	0	100	0	1	8	0	0	8	0	1	372.875	0	372.875	0	151.75	151.75	0	230	230	0	1240.5	1240.5	0	148	50	98	0	24	36	28	6	23	31	8	28	0	0	1	13	16	8	28	6	22	18
GA0	52	WT	E3	0	0	62.5	37.5	0.625	8	0	0	5	3	0.625	157.75	0	163	149	122.625	109.4	144.667	91.875	103.2	73	369.375	435.6	259	67	32	19	16	11	14	0	0	0	42	8	6	0	0	0	18	3	5	0	0	0	11
GA1	44	WT	E3	0	12.5	0	87.5	0	8	0	1	0	7	0	736.5	423	0	781.286	424.143	0	424.143	66.2857	0	66.2857	423	0	423	33	22	0	11	8	17	5	0	0	3	8	10	2	0	0	2	0	0	0	0	0	0
GA2	44	+ve	E3	0	0	100	0	1	8	0	0	8	0	1	230.625	0	230.625	0	146	146	0	281.75	281.75	0	115.75	115.75	0	18	8	10	0	8	8	2	0	0	0	8	0	0	0	0	0	0	8	2	0	0	0
GJ1	52	+ve	E3	0	0	62.5	37.5	0.625	8	0	0	5	3	0.625	187.75	0	183.2	195.333	111.75	89	149.667	274.375	24.4	691	617.625	907.4	134.667	28	14	9	5	10	9	1	0	0	8	8	1	0	0	0	5	0	5	1	0	0	3
GJ2	52	+ve	E3	12.5	0	87.5	0	0.875	8	1	0	7	0	1	640.857	0	640.857	0	112.429	112.429	0	93.1429	93.1429	0	1149	1149	0	26	10	13	3	15	9	0	0	0	2	7	2	0	0	0	1	5	7	0	0	0	1
GJ3	52	WT	E3	0	0	100	0	1	8	0	0	8	0	1	497.375	0	497.375	0	71	71	0	786.5	786.5	0	53.375	53.375	0	31	13	17	1	14	10	2	0	0	5	8	2	1	0	0	2	6	8	1	0	0	2
GG1	52	+ve	E3	0	0	62.5	37.5	0.625	8	0	0	5	3	0.625	453.875	0	402.2	540	233.875	190.6	306	65.125	59.6	74.3333	396.375	491.2	238.333	26	10	13	3	8	9	0	0	0	9	8	1	0	0	0	1	0	5	0	0	0	8
GG2	44	+ve	E3	0	0	100	0	1	8	0	0	8	0	1	248.5	0	248.5	0	83.25	83.25	0	94.125	94.125	0	925.5	925.5	0	29	12	17	0	9	11	3	2	0	4	8	3	0	1	0	0	1	8	3	1	0	4
WT	10		Mean	0	1.25	71.25	27.5	0.7125	8	0	0.1	5.7	2.2	0.7125	337.375	42.3	237.169	248.265	214.189	151.011	173.854	448.704	479.018	135.185	477.675	459.507	276.677	39.2	16.3	13.7	9.2	11.6	10.7	2.4	0.1	0.8	13.6	8	2.8	0.3	0	0.3	4.9	2.6	5.7	0.7	0	0.1	4.6
Grb10	13		Mean	0.961538	0	89.4231	9.61538	0.894231	8	0.0769231	0	7.15385	0.769231	0.903846	293.239	0	293.056	75.5128	124.85	116.732	74.1538	216.78	214.556	117.385	749.817	786.77	78.1282	37.6154	14.6154	20.6923	2.30769	11.8462	11.2308	3.92308	0.615385	1.76923	8.23077	7.92308	3.30769	0.153846	0.0769231	0.0769231	3.07692	3	7.15385	3.76923	0.538462	1.69231	4.53846
			SE	0	1.25	10.2147	9.27961	0.102147	0	0	0.1	0.817177	0.742369	0.102147	62.9144	42.3	49.3649	98.9943	56.555	53.4791	60.5772	169.78	175.057	53.8236	157.756	179.422	118.144	6.4253	2.26593	2.50799	2.98068	1.18509	0.869866	1.27541	0.1	0.8	4.58064	0	0.95219	0.213437	0	0.3	1.7477	0.845905	0.817177	0.395811	0	0.1	1.60693
			SE	0.961538	0	4.44116	4.51002	0.0444116	0	0.0769231	0	0.355292	0.360801	0.0451002	46.101	0	48.0939	42.8155	19.4182	17.5862	38.2379	73.2159	91.1911	66.6049	121.793	123.01	50.4859	9.51014	3.03724	6.54901	1.00246	1.34853	2.07597	2.10147	0.474186	1.76923	2.67504	0.0769231	2.0705	0.153846	0.0769231	0.0769231	1.06495	1.20363	0.355292	2.1127	0.461538	1.69231	1.50901
Choice - B2		C2
GB0	44	WT	E3	0	0	87.5	12.5	0.875	8	0	0	7	1	0.875	292.375	0	318.714	108	154.875	168	63	639.375	712.714	126	125	68.1429	523	21	9	9	3	8	9	4	0	0	0	8	1	0	0	0	0	0	7	2	0	0	0
GB1	52	WT	E3	62.5	0	37.5	0	0.375	8	5	0	3	0	1	1657.33	0	1657.33	0	298	298	0	126.333	126.333	0	812	812	0	6	3	3	0	3	3	0	0	0	0	3	0	0	0	0	0	0	3	0	0	0	0
GF0	52	WT	E3	12.5	0	37.5	50	0.375	8	1	0	3	4	0.428571	620	0	750	522.5	98.1429	122.333	80	181.286	163.333	194.75	148.714	42.3333	228.5	37	9	13	15	11	8	10	0	0	8	7	1	0	0	0	1	4	3	4	0	0	2
GF1	52	WT	E3	12.5	12.5	62.5	12.5	0.625	8	1	1	5	1	0.833333	1314	2338	1221.6	752	244.667	235.4	291	97.8333	107.2	51	1147.67	1211.6	828	18	8	8	2	8	7	3	0	0	0	7	1	0	0	0	0	1	5	2	0	0	0
GC0	52	+ve	E3	0	0	50	50	0.5	8	0	0	4	4	0.5	1174.88	0	1598	751.75	518.25	692	344.5	118.5	107.5	129.5	1052	1427.25	676.75	48	22	14	12	16	12	10	1	0	9	8	4	5	1	0	4	3	4	4	0	0	3
GC1	52	WT	E3	12.5	12.5	50	25	0.5	8	1	1	4	2	0.666667	1234.57	1901	777.75	1815	356.833	267	536.5	880	1127.5	385	38.8333	43.5	29.5	16	8	5	3	8	7	1	0	0	0	7	1	0	0	0	0	0	4	1	0	0	0
GC2	52	+ve	E3	0	0	75	25	0.75	8	0	0	6	2	0.75	369.625	0	463.333	88.5	82	47.6667	185	480.375	563.5	231	289.625	313.333	218.5	25	12	9	4	10	10	4	1	0	0	8	2	2	0	0	0	0	6	2	1	0	0
GC3	44	+ve	E3	0	0	100	0	1	8	0	0	8	0	1	1278.75	0	1278.75	0	49.25	49.25	0	70	70	0	1228	1228	0	27	8	19	0	8	8	11	0	0	0	8	0	0	0	0	0	0	8	11	0	0	0
GE0	44	+ve	E3	0	0	87.5	12.5	0.875	8	0	0	7	1	0.875	281.75	0	266	392	51.25	50.5714	56	181.875	187.286	144	280.75	278.714	295	29	11	13	5	10	9	7	0	0	3	8	1	2	0	0	0	0	7	5	0	0	1
GE1	44	+ve	E3	0	0	100	0	1	8	0	0	8	0	1	728.25	0	728.25	0	136.875	136.875	0	89	89	0	1122.62	1122.62	0	21	10	11	0	9	10	2	0	0	0	8	2	0	0	0	0	1	8	2	0	0	0
GE2	52	WT	E3	0	0	62.5	37.5	0.625	8	0	0	5	3	0.625	143	0	122.4	177.333	98.375	37	200.667	791	1095	284.333	44.375	25.8	75.3333	55	25	13	17	11	9	7	0	0	28	8	1	4	0	0	12	1	5	1	0	0	6
GE3	44	+ve	E3	0	0	100	0	1	8	0	0	8	0	1	129.5	0	129.5	0	113.625	113.625	0	116.5	116.5	0	984.25	984.25	0	21	8	13	0	13	8	0	0	0	0	8	0	0	0	0	0	5	8	0	0	0	0
GK1	52	WT	E3	12.5	25	50	12.5	0.5	8	1	2	4	1	0.8	525	960	423	63	485.2	487.25	477	70.8	66.25	89	1090.4	1263.25	399	17	11	5	1	8	7	0	0	0	2	7	2	0	0	0	2	1	4	0	0	0	0
GK3	52	+ve	E3	12.5	0	87.5	0	0.875	8	1	0	7	0	1	844.857	0	844.857	0	179.714	179.714	0	168.143	168.143	0	660	660	0	17	8	9	0	8	8	1	0	0	0	7	1	0	0	0	0	1	7	1	0	0	0
GK4	44	+ve	E3	25	0	75	0	0.75	8	2	0	6	0	1	635.833	0	635.833	0	112.833	112.833	0	128.333	128.333	0	1115.17	1115.17	0	81	19	62	0	8	16	57	0	0	0	6	10	3	0	0	0	2	6	54	0	0	0
GA0	52	WT	E3	0	0	50	50	0.5	8	0	0	4	4	0.5	761.125	0	519.5	1002.75	127	155	99	274.875	465.5	84.25	167.375	98	236.75	34	17	6	11	9	13	1	0	3	8	8	5	0	0	0	4	0	4	0	0	0	2
GA1	44	WT	E3	0	0	0	100	0	8	0	0	0	8	0	854.875	0	0	854.875	333.875	0	333.875	57.625	0	57.625	410.625	0	410.625	31	18	0	13	11	18	2	0	0	0	8	10	0	0	0	0	0	0	0	0	0	0
GA2	44	+ve	E3	0	0	50	50	0.5	8	0	0	4	4	0.5	282.625	0	320.25	245	280.75	138.5	423	729.375	933	525.75	46.5	48	45	19	10	4	5	8	9	1	0	0	1	8	1	0	0	0	1	0	4	0	0	0	0
GJ1	52	+ve	E3	25	0	50	25	0.5	8	2	0	4	2	0.666667	953	0	733.75	1391.5	304	174.75	562.5	80.5	117.5	6.5	748.833	950.5	345.5	20	11	5	4	6	8	5	0	0	1	6	2	3	0	0	0	0	4	1	0	0	0
GJ2	52	+ve	E3	37.5	0	37.5	25	0.375	8	3	0	3	2	0.6	1019.8	0	655.667	1566	274.2	240.667	324.5	253.2	232.667	284	1028.4	1238.67	713	13	7	3	3	5	7	1	0	0	0	5	2	0	0	0	0	0	3	0	0	0	0
GJ3	52	WT	E3	75	25	0	0	0	8	6	2	0	0	0	1963.5	1963.5	0	0	0	0	0	0	0	0	0	0	0	10	2	1	7	9	0	0	0	0	1	2	0	0	0	0	0	1	0	0	0	0	0
GG1	52	+ve	E3	37.5	12.5	50	0	0.5	8	3	1	4	0	1	1878.4	2605	1696.75	0	175.5	175.5	0	166.5	166.5	0	468	468	0	18	7	7	4	9	6	3	0	0	0	5	2	0	0	0	0	0	4	3	0	0	0
GG2	44	+ve	E3	75	0	25	0	0.25	8	6	0	2	0	1	850	0	850	0	59	59	0	178.5	178.5	0	820.5	820.5	0	5	3	2	0	2	3	0	0	0	0	2	1	0	0	0	0	0	2	0	0	0	0
WT	10		Mean	18.75	7.5	43.75	30	0.4375	8	1.5	0.6	3.5	2.4	0.572857	936.578	716.25	579.03	529.546	219.697	176.998	208.104	311.913	386.383	127.196	398.499	356.463	273.071	24.5	11	6.3	7.2	8.6	8.1	2.8	0	0.3	4.7	6.5	2.2	0.4	0	0	1.9	0.8	3.5	1	0	0	1
Grb10	13		Mean	16.3462	0.961538	68.2692	14.4231	0.682692	8	1.30769	0.0769231	5.46154	1.15385	0.837821	802.097	200.385	784.688	341.135	179.788	166.996	145.808	212.369	235.264	101.596	757.281	819.616	176.442	26.4615	10.4615	13.1538	2.84615	8.61538	8.76923	7.84615	0.153846	0	1.07692	6.69231	2.15385	1.15385	0.0769231	0	0.384615	0.923077	5.46154	6.38462	0.0769231	0	0.307692
			SE	8.5898	3.33333	8.5898	9.71825	0.085898	0	0.687184	0.266667	0.687184	0.77746	0.109907	187.295	311.392	170.59	185.949	47.0987	48.0992	61.3622	104.258	139.862	39.725	142.021	165.699	85.3788	4.66011	2.24103	1.42244	1.99332	0.748331	1.55956	1.06249	0	0.3	2.78109	0.687184	0.975249	0.4	0	0	1.19675	0.38873	0.687184	0.421637	0	0	0.614636
			SE	6.39019	0.961538	7.1633	5.26656	0.071633	0	0.511215	0.0769231	0.573064	0.421325	0.0570261	134.26	200.385	134.145	153.222	37.3417	46.834	55.4873	52.1873	67.6423	44.8499	105.71	119.518	72.4041	5.31521	1.40336	4.29347	0.966398	0.957685	0.848482	4.21816	0.104154	0	0.702208	0.511215	0.714736	0.464733	0.0769231	0	0.310881	0.430586	0.573064	4.05655	0.0769231	0	0.237093
Choice - B3		C3
GB0	44	WT	E3	0	0	87.5	12.5	0.875	8	0	0	7	1	0.875	1078.62	0	1076.14	1096	293.875	313	160	800.625	861.714	373	48.5	46	66	29	17	9	3	9	16	4	0	0	0	8	8	1	0	0	0	1	7	1	0	0	0
GB1	52	WT	E3	62.5	12.5	12.5	12.5	0.125	8	5	1	1	1	0.5	1903.67	743	995	3973	556	193	919	119.5	152	87	453	712	194	13	9	3	1	3	4	1	0	0	5	3	2	1	0	0	3	0	1	0	0	0	2
GF0	52	WT	E3	0	0	50	50	0.5	8	0	0	4	4	0.5	890	0	1250	530	305.375	322	288.75	246	266.5	225.5	117.5	131	104	48	11	13	24	22	10	16	0	0	0	8	2	1	0	0	0	5	4	4	0	0	0
GF1	52	WT	E3	87.5	0	12.5	0	0.125	8	7	0	1	0	1	2292	0	2292	0	64	64	0	86	86	0	1331	1331	0	2	1	1	0	1	1	0	0	0	0	1	0	0	0	0	0	0	1	0	0	0	0
GC0	52	+ve	E3	25	12.5	37.5	25	0.375	8	2	1	3	2	0.6	1385.67	1445	1352.33	1406	545.8	453.667	684	126.2	101.667	163	1010	1256.67	640	60	16	25	19	19	5	12	0	0	24	6	0	4	0	0	6	7	3	7	0	0	8
GC1	52	WT	E3	25	25	37.5	12.5	0.375	8	2	2	3	1	0.75	2146.17	2589.5	2056	1530	445.75	533	184	8984.75	11081.7	2694	33.25	29.3333	45	20	11	5	4	7	8	5	0	0	0	6	4	1	0	0	0	0	3	2	0	0	0
GC2	52	+ve	E3	0	0	87.5	12.5	0.875	8	0	0	7	1	0.875	1214.38	0	1005.43	2677	102	97.7143	132	612.625	657.571	298	293.375	288.286	329	17	9	7	1	8	9	0	0	0	0	8	1	0	0	0	0	0	7	0	0	0	0
GC3	44	+ve	E3	12.5	25	62.5	0	0.625	8	1	2	5	0	1	718.714	1786	291.8	0	37.2	37.2	0	268.2	268.2	0	1060.8	1060.8	0	17	7	10	0	7	5	5	0	0	0	7	0	0	0	0	0	0	5	5	0	0	0
GE0	44	+ve	E3	0	0	62.5	37.5	0.625	8	0	0	5	3	0.625	724.625	0	805.2	590.333	249.75	82.2	529	183.625	158.6	225.333	200.375	163.8	261.333	30	18	8	4	8	14	6	1	0	1	8	6	3	0	0	1	0	5	2	1	0	0
GE1	44	+ve	E3	50	0	50	0	0.5	8	4	0	4	0	1	612.5	0	612.5	0	292	292	0	122.75	122.75	0	1147.25	1147.25	0	8	4	4	0	4	4	0	0	0	0	4	0	0	0	0	0	0	4	0	0	0	0
GE2	52	WT	E3	0	0	87.5	12.5	0.875	8	0	0	7	1	0.875	181.375	0	179.571	194	39.25	39	41	696.375	770.571	177	35	37.5714	17	73	21	34	18	13	8	27	1	0	24	8	0	5	0	0	8	1	7	14	1	0	11
GE3	44	+ve	E3	0	0	87.5	12.5	0.875	8	0	0	7	1	0.875	471.75	0	484.286	384	135.125	147.714	47	71.125	70.2857	77	877.5	963.143	278	18	10	7	1	8	10	0	0	0	0	8	2	0	0	0	0	0	7	0	0	0	0
GK1	52	WT	E3	50	37.5	0	12.5	0	8	4	3	0	1	0	1199.75	1274.67	0	975	694	0	694	190	0	190	302	0	302	14	8	3	3	9	3	0	0	0	2	4	2	0	0	0	2	3	0	0	0	0	0
GK3	52	+ve	E3	75	12.5	12.5	0	0.125	8	6	1	1	0	1	2292.5	1099	3486	0	430	430	0	461	461	0	747	747	0	6	2	1	3	4	1	0	0	0	1	2	0	0	0	0	0	0	1	0	0	0	0
GK4	44	+ve	E3	37.5	0	62.5	0	0.625	8	3	0	5	0	1	1239.4	0	1239.4	0	198.8	198.8	0	115	115	0	1060.4	1060.4	0	62	12	50	0	5	11	46	0	0	0	5	6	1	0	0	0	0	5	45	0	0	0
GA0	52	WT	E3	0	0	62.5	37.5	0.625	8	0	0	5	3	0.625	473.875	0	234.6	872.667	72.375	67.4	80.6667	182.125	212.8	131	233.5	252.8	201.333	29	13	9	7	10	8	1	0	0	10	8	0	0	0	0	5	2	5	0	0	0	2
GA1	44	WT	E3	0	12.5	0	87.5	0	8	0	1	0	7	0	403.625	301	0	418.286	273.143	0	273.143	58.5714	0	58.5714	408.857	0	408.857	37	22	0	15	11	21	2	0	0	3	8	14	0	0	0	0	0	0	0	0	0	0
GA2	44	+ve	E3	12.5	0	75	12.5	0.75	8	1	0	6	1	0.857143	809.714	0	838	640	293.143	297.333	268	891.714	1010.83	177	75.1429	75.1667	75	22	14	7	1	7	14	1	0	0	0	7	7	0	0	0	0	0	6	1	0	0	0
GJ1	52	+ve	E3	100	0	0	0	0	8	8	0	0	0	0	0	0	0	0	0	0	0	0	0	0	0	0	0	2	0	1	1	1	0	0	0	0	1	0	0	0	0	0	0	0	0	0	0	0	1
GJ2	52	+ve	E3	50	0	50	0	0.5	8	4	0	4	0	1	1725.25	0	1725.25	0	500	500	0	164.75	164.75	0	883.25	883.25	0	18	9	6	3	5	9	3	0	0	1	4	5	0	0	0	0	0	4	1	0	0	1
GJ3	52	WT	E3	100	0	0	0	0	8	8	0	0	0	0	0	0	0	0	0	0	0	0	0	0	0	0	0	1	0	0	1	0	0	0	0	0	1	0	0	0	0	0	0	0	0	0	0	0	0
GG1	52	+ve	E3	62.5	0	37.5	0	0.375	8	5	0	3	0	1	3402.67	0	3402.67	0	636.667	636.667	0	221.333	221.333	0	525.333	525.333	0	8	3	4	1	4	3	0	0	0	1	3	0	0	0	0	0	0	3	0	0	0	1
GG2	44	+ve	E3	87.5	0	12.5	0	0.125	8	7	0	1	0	1	1482	0	1482	0	1728	1728	0	557	557	0	309	309	0	3	1	2	0	1	1	1	0	0	0	1	0	0	0	0	0	0	1	1	0	0	0
WT	10		Mean	32.5	8.75	35	23.75	0.35	8	2.6	0.7	2.8	1.9	0.5125	1056.91	490.817	808.331	958.895	274.377	153.14	264.056	1136.39	1343.13	393.607	296.261	253.97	133.819	26.6	11.3	7.7	7.6	8.5	7.9	5.6	0.1	0	4.5	5.4	3.2	0.9	0	0	1.8	1.2	2.8	2.1	0.1	0	1.5
Grb10	13		Mean	39.4231	3.84615	49.0385	7.69231	0.490385	8	3.15385	0.307692	3.92308	0.615385	0.833242	1236.86	333.077	1286.53	438.256	396.037	377.023	127.692	291.948	300.692	72.3333	629.956	652.315	121.795	20.8462	8.07692	10.1538	2.61538	6.23077	6.61538	5.69231	0.0769231	0	2.23077	4.84615	2.07692	0.615385	0	0	0.538462	0.538462	3.92308	4.76923	0.0769231	0	0.846154
			SE	12.5277	4.18745	11.1492	8.63013	0.111492	0	1.00222	0.334996	0.891939	0.690411	0.122828	260.938	270.06	273.746	370.251	74.665	57.6033	97.4434	876.183	1086.52	258.068	126.071	138.201	44.0895	6.97488	2.34307	3.22852	2.65079	2.03443	2.08407	2.82528	0.1	0	2.3863	1.00222	1.43604	0.481894	0	0	0.879394	0.533333	0.891939	1.38604	0.1	0	1.08781
			SE	9.58328	2.18561	7.81158	3.33087	0.0781158	0	0.766662	0.174848	0.624926	0.266469	0.0796939	244.749	179.804	297.504	220.021	123.731	124.983	63.4067	72.3354	80.7949	29.4597	114.313	123.16	55.2502	5.41939	1.62694	3.72938	1.41212	1.25654	1.34707	3.49979	0.0769231	0	1.81925	0.766662	0.780052	0.367571	0	0	0.461538	0.538462	0.624926	3.40654	0.0769231	0	0.60813
Forced - B1		F1		DNS	Omits	Left	Right	Inco	Trials	DNS	Omits	Left	Right	Inco
GB0	44	WT	E3	0	0	50	25	0.5	4	0	0	2	1	1	141.5	0	178.5	150	128.667	116.5	153	697.667	858.5	376	153.333	129	202	21	12	4	5	4	5	0	0	0	12	4	1	0	0	0	7	0	3	0	0	0	1
GB1	52	WT	E3	0	0	50	25	0.5	4	0	0	2	1	1	776	0	655.5	1431	371.667	360.5	394	52	53.5	49	1310	1739.5	451	13	6	5	2	5	6	1	0	0	1	4	2	0	0	0	0	0	3	1	0	0	1
GF0	52	WT	E3	25	0	25	25	0.25	4	1	0	1	1	1	656.667	0	912	518	110	83	137	472	741	203	134	95	173	54	7	29	18	13	4	1	0	0	36	3	1	0	0	0	3	7	1	0	0	0	21
GF1	52	WT	E3	0	25	25	50	0.25	4	0	1	1	2	0	806	1944	2	639	259.667	480	149.5	56.6667	44	63	1099	1737	780	13	7	4	2	4	4	0	0	0	5	4	1	0	0	0	2	0	1	0	0	0	3
GC0	52	+ve	E3	0	0	25	25	0.25	4	0	0	1	1	2	822.75	0	2283	151	300	94	506	163	90	236	1251	1334	1168	35	13	13	9	10	5	1	0	0	19	4	1	1	0	0	7	2	2	0	0	0	9
GC1	52	WT	E3	0	0	50	25	0.5	4	0	0	2	1	1	284.25	0	271	535	123	86.5	196	577.333	745.5	241	42	22.5	81	16	8	5	3	5	8	1	0	0	2	4	4	0	0	0	0	1	3	0	0	0	1
GC2	52	+ve	E3	0	0	50	25	0.5	4	0	0	2	1	1	134.5	0	129	169	206.667	50.5	519	104.333	77	159	658.333	742.5	490	11	5	3	3	4	5	0	0	0	2	4	1	0	0	0	0	0	3	0	0	0	0
GC3	44	+ve	E3	0	0	50	0	0.5	4	0	0	2	0	2	222.25	0	319.5	0	40	40	0	58.5	58.5	0	1289	1289	0	11	4	7	0	4	4	2	0	0	1	4	0	0	0	0	0	0	4	2	0	0	1
GE0	44	+ve	E3	0	0	50	0	0.5	4	0	0	2	0	2	179	0	170	0	64.5	64.5	0	73.5	73.5	0	813	813	0	24	13	9	2	4	6	1	0	0	13	4	2	0	0	0	7	0	4	1	0	0	4
GE1	44	+ve	E3	0	0	50	0	0.5	4	0	0	2	0	2	133.75	0	79	0	55	55	0	23	23	0	1281.5	1281.5	0	11	5	6	0	4	4	0	0	0	3	4	0	0	0	0	1	0	4	0	0	0	2
GE2	52	WT	E3	0	0	25	25	0.25	4	0	0	1	1	2	123.75	0	182	45	45	30	60	61.5	59	64	107	117	97	20	9	4	7	4	4	2	0	0	10	4	0	1	0	0	4	0	2	1	0	0	1
GE3	44	+ve	E3	0	0	50	50	0.5	4	0	0	2	2	0	78.75	0	63	94.5	64.25	54	74.5	577	585.5	568.5	349.75	482.5	217	12	7	3	2	4	6	1	0	1	0	4	2	0	0	1	0	0	2	1	0	0	0
GK1	52	WT	E3	0	0	50	50	0.5	4	0	0	2	2	0	274.25	0	500.5	48	360.25	370.5	350	42.5	39.5	45.5	835.5	1004.5	666.5	17	8	2	7	4	8	2	0	0	3	4	4	0	0	0	0	0	2	0	0	0	0
GK3	52	+ve	E3	0	0	50	25	0.5	4	0	0	2	1	1	199.75	0	273.5	95	133.667	86	229	52.3333	52	53	603.667	756	299	20	7	8	5	6	4	0	0	0	10	4	0	0	0	0	3	0	3	0	0	0	5
GK4	44	+ve	E3	0	0	50	0	0.5	4	0	0	2	0	2	449.25	0	592	0	218.5	218.5	0	106.5	106.5	0	1830	1830	0	81	41	40	0	11	27	9	4	0	30	4	23	0	0	0	14	7	4	9	4	0	16
GA0	52	WT	E3	0	0	50	25	0.5	4	0	0	2	1	1	151.75	0	102.5	296	156.667	66.5	337	165	214.5	66	108.333	93.5	138	23	13	6	4	4	6	0	0	0	13	4	2	0	0	0	7	0	3	0	0	0	3
GA1	44	WT	E3	0	50	0	50	0	4	0	2	0	2	0	141.25	156	0	126.5	261.5	0	261.5	103	0	103	485	0	485	16	14	0	2	4	8	0	0	0	4	4	6	0	0	0	4	0	0	0	0	0	0
GA2	44	+ve	E3	0	0	50	25	0.5	4	0	0	2	1	1	313.25	0	259.5	266	92.6667	86	106	166.667	65.5	369	98	131	32	9	5	3	1	4	4	0	0	0	1	4	0	0	0	0	1	0	3	0	0	0	0
GJ1	52	+ve	E3	0	0	50	50	0.5	4	0	0	2	2	0	137.5	0	154.5	120.5	239.25	412.5	66	192.5	35	350	536	877	195	20	10	7	3	5	5	1	0	0	9	4	1	0	0	0	5	1	2	1	0	0	3
GJ2	52	+ve	E3	0	0	25	25	0.25	4	0	0	1	1	2	637.25	0	738	845	258	60	456	81	81	81	764	1098	430	13	5	4	4	5	4	0	0	0	4	4	0	0	0	0	1	1	2	0	0	0	1
GJ3	52	WT	E3	0	0	50	0	0.5	4	0	0	2	0	2	400	0	454	0	33	33	0	485.5	485.5	0	42	42	0	12	5	7	0	6	4	0	0	0	2	4	0	0	0	0	1	2	4	0	0	0	1
GG1	52	+ve	E3	0	0	50	25	0.5	4	0	0	2	1	1	408.75	0	451.5	261	265	167.5	460	62.3333	62	63	557	690	291	24	12	9	3	6	5	1	0	0	12	4	1	0	0	0	7	1	3	1	0	0	4
GG2	44	+ve	E3	0	0	50	0	0.5	4	0	0	2	0	2	1040.25	0	1871	0	65.5	65.5	0	84	84	0	970	970	0	12	6	6	0	4	5	0	0	0	3	4	1	0	0	0	1	0	4	0	0	0	2
WT	10		Mean	2.5	7.5	37.5	30	0.375	4	0.1	0.3	1.5	1.2	0.9	375.542	210	325.8	378.85	184.942	162.65	203.8	271.317	324.1	121.05	431.617	498	307.35	20.5	8.9	6.6	5	5.3	5.7	0.7	0	0	8.8	3.9	2.1	0.1	0	0	2.8	1	2.2	0.2	0	0	3.2
Grb10	13		Mean	0	0	46.1538	19.2308	0.461538	4	0	0	1.84615	0.769231	1.38462	365.923	0	567.962	154	154.077	111.846	185.885	134.205	107.192	144.577	846.25	945.731	240.154	21.7692	10.2308	9.07692	2.46154	5.46154	6.46154	1.23077	0.307692	0.0769231	8.23077	4	2.46154	0.0769231	0	0.0769231	3.61538	0.923077	3.07692	1.15385	0.307692	0	3.61538
			SE	2.5	5.33594	5.59017	5	0.0559017	0	0.1	0.213437	0.223607	0.2	0.233333	86.0901	193.289	94.6057	137.671	38.4612	54.5115	40.9454	81.0869	109.698	36.7629	151.38	226.627	85.1375	3.89658	0.971253	2.56558	1.61245	0.882547	0.558768	0.260342	0	0	3.32265	0.1	0.622718	0.1	0	0	0.85375	0.699206	0.38873	0.133333	0	0	2.00444
			SE	0	0	2.60386	5.02705	0.0260386	0	0	0	0.104154	0.201082	0.21299	82.9689	0	195.166	63.4697	26.4968	28.7674	60.4113	39.3872	40.3385	50.917	129.613	119.573	91.276	5.3579	2.71783	2.69962	0.712664	0.65648	1.7232	0.671335	0.307692	0.0769231	2.42094	0	1.7232	0.0769231	0	0.0769231	1.16321	0.536627	0.239164	0.677913	0.307692	0	1.24827
Forced - B2		F2		DNS	Omits	Left	Right	Inco	Trials	DNS	Omits	Left	Right	Inco
GB0	44	WT	E3	0	0	50	25	0.5	4	0	0	2	1	1	170.5	0	164	166	234.333	292.5	118	611.333	779.5	275	95	66.5	152	8	4	3	1	4	4	0	0	0	0	4	0	0	0	0	0	0	3	0	0	0	0
GB1	52	WT	E3	0	0	50	25	0.5	4	0	0	2	1	1	1251.5	0	944.5	1707	1007.67	751	1521	119.333	147	64	733.667	932.5	336	8	4	3	1	4	4	0	0	0	0	4	0	0	0	0	0	0	3	0	0	0	0
GF0	52	WT	E3	0	0	50	0	0.5	4	0	0	2	0	2	175.25	0	169	0	100	100	0	871	871	0	102	102	0	43	10	18	15	4	7	11	1	0	20	4	3	2	0	0	1	0	4	6	0	0	8
GF1	52	WT	E3	0	0	50	50	0.5	4	0	0	2	2	0	421.75	0	553.5	290	161	189	133	63.5	80	47	828	1167.5	488.5	21	11	6	4	7	5	0	0	0	9	4	1	0	0	0	6	3	2	0	0	0	1
GC0	52	+ve	E3	0	0	25	0	0.25	4	0	0	1	0	3	568.75	0	301	0	392	392	0	87	87	0	1215	1215	0	27	10	12	5	8	5	1	0	0	13	4	1	0	0	0	5	3	3	1	0	0	5
GC1	52	WT	E3	0	0	50	50	0.5	4	0	0	2	2	0	939.5	0	1033	846	360.5	525	196	684.25	1164.5	204	65.75	56	75.5	13	6	3	4	4	4	3	0	0	2	4	0	0	0	0	2	0	2	1	0	0	0
GC2	52	+ve	E3	0	0	50	25	0.5	4	0	0	2	1	1	194.25	0	111	395	57	39.5	92	478.667	627	182	287.667	317.5	228	10	5	4	1	4	5	1	0	0	0	4	1	0	0	0	0	0	3	1	0	0	0
GC3	44	+ve	E3	0	0	50	0	0.5	4	0	0	2	0	2	223	0	281.5	0	41.5	41.5	0	61.5	61.5	0	1181.5	1181.5	0	13	4	9	0	4	4	2	0	0	3	4	0	0	0	0	0	0	4	2	0	0	3
GE0	44	+ve	E3	0	0	50	0	0.5	4	0	0	2	0	2	400.5	0	477.5	0	72.5	72.5	0	128.5	128.5	0	274.5	274.5	0	18	10	7	1	4	9	0	0	0	5	4	5	0	0	0	1	0	4	0	0	0	3
GE1	44	+ve	E3	0	50	50	0	0.5	4	0	2	2	0	0	284.25	464	104.5	0	180	180	0	91	91	0	1137	1137	0	9	7	2	0	4	4	0	0	0	1	4	2	0	0	0	1	0	2	0	0	0	0
GE2	52	WT	E3	0	0	25	25	0.25	4	0	0	1	1	2	127.25	0	93	158	101.5	23	180	552.5	935	170	23	19	27	29	12	7	10	8	4	2	0	0	15	4	0	2	0	0	6	1	2	0	0	0	4
GE3	44	+ve	E3	0	0	50	0	0.5	4	0	0	2	0	2	106	0	124.5	0	249	249	0	125	125	0	1072	1072	0	10	4	6	0	6	4	0	0	0	0	4	0	0	0	0	0	2	4	0	0	0	0
GK1	52	WT	E3	0	0	50	50	0.5	4	0	0	2	2	0	324.25	0	129	519.5	394	338.5	449.5	94.25	89	99.5	838	1183.5	492.5	14	5	5	4	4	4	1	0	0	5	4	0	0	0	0	1	0	2	1	0	0	2
GK3	52	+ve	E3	0	0	50	25	0.5	4	0	0	2	1	1	217.5	0	276.5	208	275	200.5	424	246.667	333.5	73	460.333	532	317	12	7	4	1	4	7	0	0	0	1	4	3	0	0	0	0	0	3	0	0	0	1
GK4	44	+ve	E3	0	0	50	0	0.5	4	0	0	2	0	2	106.75	0	65.5	0	83.5	83.5	0	86	86	0	958.5	958.5	0	80	25	55	0	4	9	17	0	0	50	4	5	4	0	0	12	0	4	13	0	0	38
GA0	52	WT	E3	0	0	25	50	0.25	4	0	0	1	2	1	189.25	0	183	155	258.667	39	368.5	159.333	363	57.5	181.333	4	270	27	14	5	8	6	10	0	0	0	11	4	6	0	0	0	4	2	1	0	0	0	2
GA1	44	WT	E3	0	75	0	25	0	4	0	3	0	1	0	1085.5	697.667	0	2249	1160	0	1160	44	0	44	421	0	421	10	9	0	1	4	6	0	0	0	0	4	5	0	0	0	0	0	0	0	0	0	0
GA2	44	+ve	E3	0	0	50	50	0.5	4	0	0	2	2	0	692.5	0	825.5	559.5	359.25	579.5	139	736.75	1187.5	286	37.75	40	35.5	10	4	3	3	4	4	2	0	0	0	4	0	0	0	0	0	0	2	1	0	0	0
GJ1	52	+ve	E3	0	0	50	50	0.5	4	0	0	2	2	0	125.5	0	177	74	144.75	46	243.5	431.75	102	761.5	566.25	943.5	189	11	5	4	2	4	5	1	0	0	1	4	1	0	0	0	0	0	2	1	0	0	1
GJ2	52	+ve	E3	0	0	50	50	0.5	4	0	0	2	2	0	296	0	249.5	342.5	374.25	324	424.5	126.5	164	89	835.5	1135.5	535.5	16	8	4	4	5	7	4	0	0	0	4	3	1	0	0	0	0	2	2	0	0	0
GJ3	52	WT	E3	75	25	0	0	0	4	3	1	0	0	0	951	951	0	0	0	0	0	0	0	0	0	0	0	3	2	1	0	2	0	0	0	0	1	1	0	0	0	0	1	1	0	0	0	0	0
GG1	52	+ve	E3	0	0	50	25	0.5	4	0	0	2	1	1	1139.25	0	832	2109	278.667	96.5	643	199.333	251.5	95	329	406	175	15	7	7	1	7	7	1	0	0	0	4	3	0	0	0	0	3	3	1	0	0	0
GG2	44	+ve	E3	0	0	50	0	0.5	4	0	0	2	0	2	276.5	0	334.5	0	86	86	0	146.5	146.5	0	750	750	0	15	9	6	0	4	9	1	0	0	1	4	5	0	0	0	0	0	4	1	0	0	1
WT	10		Mean	7.5	10	35	30	0.35	4	0.3	0.4	1.4	1.2	0.7	563.575	164.867	326.9	609.05	377.767	225.8	412.6	319.95	442.9	96.1	328.775	353.1	226.25	17.6	7.7	5.1	4.8	4.7	4.8	1.7	0.1	0	6.3	3.7	1.5	0.4	0	0	2.1	0.7	1.9	0.8	0	0	1.7
Grb10	13		Mean	0	3.84615	48.0769	17.3077	0.480769	4	0	0.153846	1.92308	0.692308	1.23077	356.212	35.6923	320.038	283.692	199.494	183.885	151.231	226.551	260.846	114.346	700.385	766.385	113.846	18.9231	8.07692	9.46154	1.38462	4.76923	6.07692	2.30769	0	0	5.76923	4	2.23077	0.384615	0	0	1.46154	0.615385	3.07692	1.76923	0	0	4
			SE	7.5	7.63763	6.66667	6.2361	0.0666667	0	0.3	0.305505	0.266667	0.249444	0.260342	139.454	111.521	120.698	245.146	124.148	80.1165	163.195	102.014	141.525	28.913	109.523	163.463	63.4094	3.89358	1.2741	1.5878	1.52607	0.558768	0.81377	1.08577	0.1	0	2.26102	0.3	0.734091	0.266667	0	0	0.752034	0.334996	0.406885	0.592546	0	0	0.817177
			SE	0	3.84615	1.92308	5.92732	0.0192308	0	0	0.153846	0.0769231	0.237093	0.280883	81.2488	35.6923	70.0255	160.862	35.6844	45.5607	60.0845	55.948	88.1126	59.2205	110.845	112.233	46.5714	5.26169	1.53365	3.86738	0.460469	0.378151	0.560008	1.2628	0	0	3.81823	0	0.532939	0.310881	0	0	0.958199	0.330859	0.239164	0.955107	0	0	2.8667
Forced - B3		F3		DNS	Omits	Left	Right	Inco	Trials	DNS	Omits	Left	Right	Inco
GB0	44	WT	E3	0	0	50	50	0.5	4	0	0	2	2	0	358.5	0	558.5	158.5	151	63.5	238.5	596.75	802	391.5	41.5	38.5	44.5	9	4	2	3	4	4	1	0	0	0	4	0	0	0	0	0	0	2	0	0	0	0
GB1	52	WT	E3	75	0	25	0	0.25	4	3	0	1	0	0	723	0	723	0	69	69	0	125	125	0	856	856	0	2	1	1	0	1	1	0	0	0	0	1	0	0	0	0	0	0	1	0	0	0	0
GF0	52	WT	E3	0	0	25	50	0.25	4	0	0	1	2	1	582	0	510	694	216	54	297	193.333	119	230.5	156.333	39	215	20	7	4	9	4	6	6	0	0	4	4	2	1	0	0	0	0	1	1	0	0	2
GF1	52	WT	E3	25	0	50	25	0.5	4	1	0	2	1	0	628	0	879.5	125	413.667	128.5	984	113.667	121	99	1215.67	1557	533	12	6	3	3	4	6	2	0	0	0	3	3	0	0	0	0	0	2	1	0	0	0
GC0	52	+ve	E3	0	0	0	0	0	4	0	0	0	0	4	308	0	0	0	0	0	0	0	0	0	0	0	0	25	11	9	5	7	7	0	0	0	11	4	3	0	0	0	4	1	2	0	0	0	6
GC1	52	WT	E3	50	0	25	25	0.25	4	2	0	1	1	0	2095.5	0	1719	2472	469.5	844	95	10570	21014	126	51.5	8	95	5	2	2	1	2	2	1	0	0	0	2	0	0	0	0	0	0	1	1	0	0	0
GC2	52	+ve	E3	0	0	50	25	0.5	4	0	0	2	1	1	205.5	0	224.5	197	242.333	103.5	520	394	461	260	451.333	517.5	319	9	5	3	1	4	5	0	0	0	0	4	1	0	0	0	0	0	3	0	0	0	0
GC3	44	+ve	E3	0	25	50	0	0.5	4	0	1	2	0	1	159.25	169	159.5	0	36	36	0	51.5	51.5	0	1243	1243	0	11	5	6	0	4	3	3	0	0	1	4	0	1	0	0	0	0	3	2	0	0	1
GE0	44	+ve	E3	0	0	50	0	0.5	4	0	0	2	0	2	1055.25	0	1490	0	47	47	0	78.5	78.5	0	136.5	136.5	0	11	6	5	0	4	6	0	0	0	1	4	2	0	0	0	0	0	4	0	0	0	1
GE1	44	+ve	E3	50	25	25	0	0.25	4	2	1	1	0	0	1530.5	770	2291	0	495	495	0	99	99	0	1152	1152	0	4	3	1	0	2	2	0	0	0	0	2	1	0	0	0	0	0	1	0	0	0	0
GE2	52	WT	E3	0	0	50	0	0.5	4	0	0	2	0	2	348.5	0	593.5	0	53	53	0	932.5	932.5	0	58	58	0	29	8	15	6	6	5	3	0	0	15	4	1	1	0	0	2	1	4	1	0	0	9
GE3	44	+ve	E3	0	0	50	25	0.5	4	0	0	2	1	1	408.5	0	432.5	325	201.333	111.5	381	116	140	68	800.667	1044.5	313	9	4	4	1	5	4	0	0	0	0	4	0	0	0	0	0	1	3	0	0	0	0
GK1	52	WT	E3	75	25	0	0	0	4	3	1	0	0	0	1042	1042	0	0	0	0	0	0	0	0	0	0	0	4	4	0	0	1	3	0	0	0	0	1	3	0	0	0	0	0	0	0	0	0	0
GK3	52	+ve	E3	75	25	0	0	0	4	3	1	0	0	0	1788	1788	0	0	0	0	0	0	0	0	0	0	0	1	1	0	0	1	0	0	0	0	0	1	0	0	0	0	0	0	0	0	0	0	0
GK4	44	+ve	E3	0	25	50	0	0.5	4	0	1	2	0	1	1474	2850	768	0	73.5	73.5	0	97.5	97.5	0	1093	1093	0	36	8	28	0	4	6	23	0	0	3	4	3	1	0	0	0	0	3	22	0	0	3
GA0	52	WT	E3	0	0	25	25	0.25	4	0	0	1	1	2	1252.5	0	892	239	78	32	124	329.5	589	70	369.5	479	260	12	7	2	3	5	7	0	0	0	0	4	3	0	0	0	0	0	2	0	0	0	0
GA1	44	WT	E3	0	50	0	50	0	4	0	2	0	2	0	411	131.5	0	690.5	1080	0	1080	44.5	0	44.5	677	0	677	24	18	0	6	5	13	0	0	0	6	4	11	0	0	0	3	0	0	0	0	0	0
GA2	44	+ve	E3	25	0	50	25	0.5	4	1	0	2	1	0	532	0	639	318	169	168.5	170	970.333	1180	551	58.3333	63.5	48	11	6	4	1	3	5	2	0	0	1	3	2	0	0	0	1	0	2	2	0	0	0
GJ1	52	+ve	E3	75	25	0	0	0	4	3	1	0	0	0	872	872	0	0	0	0	0	0	0	0	0	0	0	1	1	0	0	1	0	0	0	0	0	1	0	0	0	0	0	0	0	0	0	0	0
GJ2	52	+ve	E3	50	0	25	25	0.25	4	2	0	1	1	0	2027.5	0	1385	2670	915.5	1174	657	100.5	104	97	689.5	959	420	13	4	7	2	4	2	4	0	0	3	2	0	0	0	0	2	2	1	3	0	0	1
GJ3	52	WT	E3	100	0	0	0	0	4	4	0	0	0	0	0	0	0	0	0	0	0	0	0	0	0	0	0	2	0	2	0	2	0	0	0	0	0	0	0	0	0	0	0	2	0	0	0	0	0
GG1	52	+ve	E3	75	0	25	0	0.25	4	3	0	1	0	0	852	0	852	0	1303	1303	0	63	63	0	586	586	0	7	2	5	0	4	2	1	0	0	0	1	1	0	0	0	0	3	1	1	0	0	0
GG2	44	+ve	E3	100	0	0	0	0	4	4	0	0	0	0	0	0	0	0	0	0	0	0	0	0	0	0	0	0	0	0	0	0	0	0	0	0	0	0	0	0	0	0	0	0	0	0	0	0	0
WT	10		Mean	32.5	7.5	25	22.5	0.25	4	1.3	0.3	1	0.9	0.5	744.1	117.35	587.55	437.9	253.017	124.4	281.85	1290.53	2370.25	96.15	342.55	303.55	182.45	11.9	5.7	3.1	3.1	3.4	4.7	1.3	0	0	2.5	2.7	2.3	0.2	0	0	0.5	0.3	1.3	0.4	0	0	1.1
Grb10	13		Mean	34.6154	9.61538	28.8462	7.69231	0.288462	4	1.38462	0.384615	1.15385	0.307692	0.769231	862.5	496.077	633.962	270	267.897	270.154	132.923	151.564	174.962	75.0769	477.718	522.692	84.6154	10.6154	4.30769	5.53846	0.769231	3.30769	3.23077	2.53846	0	0	1.53846	2.61538	1	0.153846	0	0	0.538462	0.538462	1.76923	2.30769	0	0	0.923077
			SE	12.3884	5.33594	6.45497	6.92219	0.0645497	0	0.495536	0.213437	0.258199	0.276887	0.268742	188.076	103.567	167.298	241.512	105.456	80.9415	129.519	1035.33	2074.48	40.3473	135.983	165.712	77.0547	3.01644	1.6128	1.378	0.971253	0.561743	1.17426	0.61554	0	0	1.5438	0.495536	1.05462	0.133333	0	0	0.341565	0.213437	0.395811	0.163299	0	0	0.9
			SE	10.4154	3.51104	6.23148	3.33087	0.0623148	0	0.416617	0.140442	0.249259	0.133235	0.323321	185.435	246.801	198.539	202.971	112.794	124.879	64.3717	73.9802	90.2091	44.7184	133.628	142.317	42.7693	2.79317	0.850223	2.03058	0.394739	0.523605	0.680816	1.74538	0	0	0.844404	0.416617	0.320256	0.104154	0	0	0.332346	0.268313	0.378151	1.66558	0	0	0.486504
Choice Total		CT		DNS	Omits	Left	Right	All Bias
GB0	44	WT	E3	0	0	91.6667	8.33333	0.916667	24	0	0	22	2	0.916667	493.042	0	483.136	602	185.625	192.364	111.5	1059.38	1133	249.5	71.5	51.2273	294.5	71	36	28	7	25	34	8	0	0	4	24	10	1	0	0	1	1	22	3	0	0	2
GB1	52	WT	E3	41.6667	4.16667	50	4.16667	0.5	24	10	1	12	1	0.923077	1034.93	743	814.417	3973	528.692	496.167	919	75.9231	75	87	940.154	1002.33	194	37	22	14	1	14	17	1	0	0	5	14	4	1	0	0	3	0	12	0	0	0	2
GF0	52	WT	E3	4.16667	0	41.6667	54.1667	0.416667	24	1	0	10	13	0.434783	574.304	0	763.8	428.538	168.043	185.3	154.769	297.304	382.5	231.769	162.391	100.7	209.846	162	38	56	68	52	29	39	1	0	41	23	6	1	0	0	8	17	10	12	0	0	17
GF1	52	WT	E3	33.3333	4.16667	45.8333	16.6667	0.458333	24	8	1	11	4	0.733333	951.062	2338	878.091	805	261.2	202.545	422.5	75.4667	84.1818	51.5	1256.53	1320.82	1079.75	50	22	19	9	21	16	4	0	0	9	16	1	0	0	0	5	3	11	3	0	0	2
GC0	52	+ve	E3	8.33333	4.16667	58.3333	29.1667	0.583333	24	2	1	14	7	0.666667	1011.45	1445	1061.64	849.143	424.952	411.357	452.143	110.476	94.1429	143.143	1137.86	1376.71	660.143	163	55	64	44	54	26	23	1	0	59	22	5	9	1	0	18	14	14	12	0	0	24
GC1	52	WT	E3	12.5	12.5	58.3333	16.6667	0.583333	24	3	3	14	4	0.777778	1108.62	2360	783.214	1309	279.889	260.643	347.25	2606.06	3078.79	951.5	61.9444	69.5714	35.25	62	31	22	9	26	25	8	0	0	3	21	7	1	0	0	2	3	14	4	0	0	1
GC2	52	+ve	E3	0	0	87.5	12.5	0.875	24	0	0	21	3	0.875	571.667	0	517.429	951.333	73.7083	60.3333	167.333	513.917	551.143	253.333	331.583	342.476	255.333	70	33	32	5	26	28	8	1	0	7	24	4	2	0	0	3	0	21	6	1	0	4
GC3	44	+ve	E3	4.16667	8.33333	87.5	0	0.875	24	1	2	21	0	1	743.565	1786	644.286	0	43.4762	43.4762	0	113.286	113.286	0	1187.9	1187.9	0	74	26	48	0	26	23	24	0	0	1	23	2	0	0	0	1	3	21	24	0	0	0
GE0	44	+ve	E3	0	0	83.3333	16.6667	0.833333	24	0	0	20	4	0.833333	402.75	0	375.15	540.75	119.167	60.85	410.75	149.958	138.95	205	352.875	369.5	269.75	89	44	34	11	26	33	14	1	0	15	24	9	5	0	0	6	0	20	8	1	0	5
GE1	44	+ve	E3	16.6667	0	83.3333	0	0.833333	24	4	0	20	0	1	489.3	0	489.3	0	180.05	180.05	0	72.95	72.95	0	1109.9	1109.9	0	55	27	28	0	25	23	5	0	0	2	20	3	2	0	0	2	5	20	3	0	0	0
GE2	52	WT	E3	0	0	79.1667	20.8333	0.791667	24	0	0	19	5	0.791667	171.208	0	175.105	156.4	69.4583	52.0526	135.6	658.625	752	303.8	49.6667	48.8947	52.6	185	68	64	53	40	26	34	1	8	76	24	2	9	0	3	30	5	19	15	1	1	23
GE3	44	+ve	E3	0	0	83.3333	16.6667	0.833333	24	0	0	20	4	0.833333	235.667	0	245.4	187	103.667	108.65	78.75	394.5	379.15	471.25	623.542	733.05	76	61	26	31	4	33	26	0	0	0	2	24	2	0	0	0	0	9	20	0	0	0	2
GK1	52	WT	E3	20.8333	20.8333	41.6667	16.6667	0.416667	24	5	5	10	4	0.714286	574.105	1148.8	347.5	422.25	341.429	275.1	507.25	67.9286	54.5	101.5	1021.64	1243.3	467.5	63	30	22	11	26	19	1	0	0	17	19	5	0	0	0	6	5	10	0	0	0	7
GK3	52	+ve	E3	29.1667	4.16667	66.6667	0	0.666667	24	7	1	16	0	1	736.529	1099	713.875	0	187.062	187.062	0	135.5	135.5	0	683.125	683.125	0	46	20	22	4	22	18	1	0	0	5	17	2	0	0	0	1	3	16	1	0	0	2
GK4	44	+ve	E3	20.8333	0	79.1667	0	0.791667	24	5	0	19	0	1	683.947	0	683.947	0	151.842	151.842	0	167.632	167.632	0	1153.53	1153.53	0	291	81	210	0	37	63	131	6	23	31	19	44	4	0	1	13	18	19	127	6	22	18
GA0	52	WT	E3	0	0	58.3333	41.6667	0.583333	24	0	0	14	10	0.583333	464.25	0	290.429	707.6	107.333	107.429	107.2	182.958	245.857	94.9	256.75	273.857	232.8	130	62	34	34	30	35	2	0	3	60	24	11	0	0	0	27	5	14	0	0	0	15
GA1	44	WT	E3	0	8.33333	0	91.6667	0	24	0	2	0	22	0	665	362	0	692.545	343.273	0	343.273	60.6818	0	60.6818	414	0	414	101	62	0	39	30	56	9	0	0	6	24	34	2	0	0	2	0	0	0	0	0	0
GA2	44	+ve	E3	4.16667	0	75	20.8333	0.75	24	1	0	18	5	0.782609	424.957	0	453	324	237.652	194.778	392	623.087	669.5	456	79.3043	87.1667	51	59	32	21	6	23	31	4	0	0	1	23	8	0	0	0	1	0	18	3	0	0	0
GJ1	52	+ve	E3	41.6667	0	37.5	20.8333	0.375	24	10	0	9	5	0.642857	515.714	0	427.889	673.8	194.143	127.111	314.8	191.286	65.7778	417.2	673.857	926.556	219	50	25	15	10	17	17	6	0	0	10	14	3	3	0	0	5	0	9	2	0	0	4
GJ2	52	+ve	E3	33.3333	0	58.3333	8.33333	0.583333	24	8	0	14	2	0.875	1030.38	0	953.857	1566	259.875	250.643	324.5	161.062	143.5	284	1044.88	1092.29	713	57	26	22	9	25	25	4	0	0	3	16	9	0	0	0	1	5	14	1	0	0	2
GJ3	52	WT	E3	58.3333	8.33333	33.3333	0	0.333333	24	14	2	8	0	1	790.6	1963.5	497.375	0	71	71	0	786.5	786.5	0	53.375	53.375	0	42	15	18	9	23	10	2	0	0	7	10	2	1	0	0	2	7	8	1	0	0	2
GG1	52	+ve	E3	33.3333	4.16667	50	12.5	0.5	24	8	1	12	3	0.8	1451.94	2605	1583.83	540	298.867	297.083	306	123.4	135.667	74.3333	441.267	492	238.333	52	20	24	8	21	18	3	0	0	10	16	3	0	0	0	1	0	12	3	0	0	9
GG2	44	+ve	E3	54.1667	0	45.8333	0	0.458333	24	13	0	11	0	1	470	0	470	0	228.364	228.364	0	151.545	151.545	0	850.364	850.364	0	37	16	21	0	12	15	4	2	0	4	11	4	0	1	0	0	1	11	4	1	0	4
WT	10		Mean	17.0833	5.83333	50	27.0833	0.5	24	4.1	1.4	12	6.5	0.687492	682.712	891.53	503.307	909.633	235.594	184.26	304.834	587.082	659.232	213.215	428.796	416.408	298.025	90.3	38.6	27.7	24	28.7	26.7	10.8	0.2	1.1	22.8	19.9	8.2	1.6	0	0.3	8.6	4.6	12	3.8	0.1	0.1	7.1
Grb10	13		Mean	18.9103	1.60256	68.9103	10.5769	0.689103	24	4.53846	0.384615	16.5385	2.53846	0.869908	674.451	533.462	663.047	433.233	192.525	177.046	188.175	223.738	216.826	177.251	743.845	800.351	190.966	84.9231	33.1538	44	7.76923	26.6923	26.6154	17.4615	0.846154	1.76923	11.5385	19.4615	7.53846	1.92308	0.153846	0.0769231	4	4.46154	16.5385	14.9231	0.692308	1.69231	5.69231
			SE	6.61584	2.16951	7.93006	8.87695	0.0793006	0	1.5878	0.520683	1.90321	2.13047	0.0927878	91.791	315.273	95.133	359.027	45.8891	44.961	85.3629	250.802	294.831	87.7002	147.038	171.882	99.6791	16.5046	5.96881	6.09927	7.27553	3.35012	4.13132	4.40404	0.133333	0.822598	8.40873	1.5878	3.05432	0.845905	0	0.3	3.39346	1.56489	1.90321	1.69837	0.1	0.1	2.59251
			SE	5.00657	0.751669	4.77912	2.77572	0.0477912	0	1.20158	0.180401	1.14699	0.666173	0.0351475	91.0728	247.709	99.3589	134.365	28.2663	28.9291	50.556	47.8543	53.3278	51.1728	102.384	108.127	67.992	19.2748	4.92488	14.3017	3.21286	2.86084	3.3884	9.70105	0.464733	1.76923	4.561	1.20158	3.12068	0.76344	0.104154	0.0769231	1.52753	1.62361	1.14699	9.50807	0.458322	1.69231	2.03301
Forced Total		FT		DNS	Omits	Left	Right	Inco	Trials	DNS	Omits	Left	Right	Inco
GB0	44	WT	E3	0	0	50	33.3333	0.5	12	0	0	6	4	2	223.5	0	300.333	158.25	169.3	157.5	187	631.4	813.333	358.5	91.1	78	110.75	38	20	9	9	12	13	1	0	0	12	12	1	0	0	0	7	0	8	0	0	0	1
GB1	52	WT	E3	25	0	41.6667	16.6667	0.416667	12	3	0	5	2	2	981.444	0	784.6	1569	601	458.4	957.5	91.2857	105.2	56.5	998.143	1240	393.5	23	11	9	3	10	11	1	0	0	1	9	2	0	0	0	0	0	7	1	0	0	1
GF0	52	WT	E3	8.33333	0	33.3333	25	0.333333	12	1	0	4	3	4	454.455	0	440	635.333	152.571	84.25	243.667	466.571	650.5	221.333	134.429	84.5	201	117	24	51	42	21	17	18	1	0	60	11	6	3	0	0	4	7	6	7	0	0	31
GF1	52	WT	E3	8.33333	8.33333	41.6667	41.6667	0.416667	12	1	1	5	5	0	617.727	1944	573.6	396.6	266.4	223	309.8	76.5	89.2	63.8	1025.6	1437.2	614	46	24	13	9	15	15	2	0	0	14	11	5	0	0	0	8	3	5	1	0	0	4
GC0	52	+ve	E3	0	0	16.6667	8.33333	0.166667	12	0	0	2	1	9	566.5	0	1292	151	330.667	243	506	137.667	88.5	236	1239	1274.5	1168	87	34	34	19	25	17	2	0	0	43	12	5	1	0	0	16	6	7	1	0	0	20
GC1	52	WT	E3	16.6667	0	41.6667	33.3333	0.416667	12	2	0	5	4	1	908.6	0	865.4	1174.75	305.556	413.4	170.75	2845.44	4966.8	193.75	54.6667	33	81.75	34	16	10	8	11	14	5	0	0	4	10	4	0	0	0	2	1	6	2	0	0	1
GC2	52	+ve	E3	0	0	50	25	0.5	12	0	0	6	3	3	178.083	0	154.833	253.667	168.667	64.5	377	325.667	388.333	200.333	465.778	525.833	345.667	30	15	10	5	12	15	1	0	0	2	12	3	0	0	0	0	0	9	1	0	0	0
GC3	44	+ve	E3	0	8.33333	50	0	0.5	12	0	1	6	0	5	201.5	169	253.5	0	39.1667	39.1667	0	57.1667	57.1667	0	1237.83	1237.83	0	35	13	22	0	12	11	7	0	0	5	12	0	1	0	0	0	0	11	6	0	0	5
GE0	44	+ve	E3	0	0	50	0	0.5	12	0	0	6	0	6	544.917	0	712.5	0	61.3333	61.3333	0	93.5	93.5	0	408	408	0	53	29	21	3	12	21	1	0	0	19	12	9	0	0	0	8	0	12	1	0	0	8
GE1	44	+ve	E3	16.6667	25	41.6667	0	0.416667	12	2	3	5	0	2	473.3	566	531.6	0	193	193	0	65.4	65.4	0	1197.8	1197.8	0	24	15	9	0	10	10	0	0	0	4	10	3	0	0	0	2	0	7	0	0	0	2
GE2	52	WT	E3	0	0	33.3333	16.6667	0.333333	12	0	0	4	2	6	199.833	0	365.5	101.5	66.5	39.75	120	515.5	714.75	117	62.6667	63	62	78	29	26	23	18	13	7	0	0	40	12	1	4	0	0	12	2	8	2	0	0	14
GE3	44	+ve	E3	0	0	50	25	0.5	12	0	0	6	3	3	197.75	0	206.667	171.333	151	138.167	176.667	322.889	283.5	401.667	660.556	866.333	249	31	15	13	3	15	14	1	0	1	0	12	2	0	0	1	0	3	9	1	0	0	0
GK1	52	WT	E3	25	8.33333	33.3333	33.3333	0.333333	12	3	1	4	4	0	381.778	1042	314.75	283.75	377.125	354.5	399.75	68.375	64.25	72.5	836.75	1094	579.5	35	17	7	11	9	15	3	0	0	8	9	7	0	0	0	1	0	4	1	0	0	2
GK3	52	+ve	E3	25	8.33333	33.3333	16.6667	0.333333	12	3	1	4	2	2	384.111	1788	275	151.5	204.333	143.25	326.5	149.5	192.75	63	532	644	308	33	15	12	6	11	11	0	0	0	11	9	3	0	0	0	3	0	6	0	0	0	6
GK4	44	+ve	E3	0	8.33333	50	0	0.5	12	0	1	6	0	5	676.667	2850	475.167	0	125.167	125.167	0	96.6667	96.6667	0	1293.83	1293.83	0	197	74	123	0	19	42	49	4	0	83	12	31	5	0	0	26	7	11	44	4	0	57
GA0	52	WT	E3	0	0	33.3333	33.3333	0.333333	12	0	0	4	4	4	531.167	0	320	211.25	175.25	51	299.5	204	345.25	62.75	201	167.5	234.5	62	34	13	15	15	23	0	0	0	24	12	11	0	0	0	11	2	6	0	0	0	5
GA1	44	WT	E3	0	58.3333	0	41.6667	0	12	0	7	0	5	0	545.917	381.143	0	776.6	768.6	0	768.6	67.8	0	67.8	549	0	549	50	41	0	9	13	27	0	0	0	10	12	22	0	0	0	7	0	0	0	0	0	0
GA2	44	+ve	E3	8.33333	0	50	33.3333	0.5	12	1	0	6	4	1	510.818	0	574.667	425.75	222.2	278	138.5	635.8	811	373	62	78.1667	37.75	30	15	10	5	11	13	4	0	0	2	11	2	0	0	0	2	0	7	3	0	0	0
GJ1	52	+ve	E3	25	8.33333	33.3333	33.3333	0.333333	12	3	1	4	4	0	213.778	872	165.75	97.25	192	229.25	154.75	312.125	68.5	555.75	551.125	910.25	192	32	16	11	5	10	10	2	0	0	10	9	2	0	0	0	5	1	4	2	0	0	4
GJ2	52	+ve	E3	16.6667	0	33.3333	33.3333	0.333333	12	2	0	4	4	2	778.8	0	655.5	1050	480.5	470.5	490.5	108.625	128.25	89	781.125	1082	480.25	42	17	15	10	14	13	8	0	0	7	10	3	1	0	0	3	3	5	5	0	0	2
GJ3	52	WT	E3	58.3333	8.33333	16.6667	0	0.166667	12	7	1	2	0	2	510.2	951	454	0	33	33	0	485.5	485.5	0	42	42	0	17	7	10	0	10	4	0	0	0	3	5	0	0	0	0	2	5	4	0	0	0	1
GG1	52	+ve	E3	25	0	41.6667	16.6667	0.416667	12	3	0	5	2	2	782.667	0	683.8	1185	419.143	366.2	551.5	121.143	138	79	463.429	555.6	233	46	21	21	4	17	14	3	0	0	12	9	5	0	0	0	7	7	7	3	0	0	4
GG2	44	+ve	E3	33.3333	0	33.3333	0	0.333333	12	4	0	4	0	4	658.375	0	1102.75	0	75.75	75.75	0	115.25	115.25	0	860	860	0	27	15	12	0	8	14	1	0	0	4	8	6	0	0	0	1	0	8	1	0	0	3
WT	10		Mean	14.1667	8.33333	32.5	27.5	0.325	12	1.7	1	3.9	3.3	2.1	535.462	431.814	441.818	530.703	291.53	181.48	345.657	545.238	823.478	121.393	399.535	423.92	282.6	50	22.3	14.8	12.9	13.4	15.2	3.7	0.1	0	17.6	10.3	5.9	0.7	0	0	5.4	2	5.4	1.4	0	0	6
Grb10	13		Mean	11.5385	4.48718	41.0256	14.7436	0.410256	12	1.38462	0.538462	4.92308	1.76923	3.38462	474.405	480.385	544.903	268.115	204.84	186.714	209.34	195.492	194.371	153.673	750.191	841.088	231.821	51.3077	22.6154	24.0769	4.61538	13.5385	15.7692	6.07692	0.307692	0.0769231	15.5385	10.6154	5.69231	0.615385	0	0.0769231	5.61538	2.07692	7.92308	5.23077	0.307692	0	8.53846
			SE	5.83333	5.69275	4.55589	4.12946	0.0455589	0	0.7	0.68313	0.546707	0.495536	0.640312	80.6786	212.13	79.3355	161.585	74.2944	54.1863	94.0533	264.714	469.77	33.7357	130.336	184.12	73.6822	9.35474	3.2865	4.51614	3.78726	1.22202	1.99332	1.75151	0.1	0	5.97067	0.7	2.07873	0.472582	0	0	1.335	0.760117	0.748331	0.669992	0	0	3.06594
			SE	3.47181	2.0271	2.90237	3.90798	0.0290237	0	0.416617	0.243252	0.348284	0.468957	0.665433	61.6087	245.847	98.1549	110.43	37.0044	35.7048	59.6007	45.4217	57.8371	51.6574	108.449	105.327	90.0556	12.9716	4.61955	8.47278	1.4524	1.26904	2.34016	3.64351	0.307692	0.0769231	6.42473	0.416617	2.19961	0.384615	0	0.0769231	2.09865	0.788227	0.664691	3.27021	0.307692	0	4.29313
[truncated: 103 more columns]

[truncated: 4 more sheets: E3-Averages, E3-Totals, E3-FORCED, Sheet2]
